# Supplementary material for: Plant protein peptidase inhibitors: an evolutionary overview based on comparative genomics
Source: PubMed Central journal article supplement (PMC4189545; doi:10.1186/1471-2164-15-812), 2014-09-25
Supplement: 12864_2014_6493_MOESM1_ESM.pdf [file 12864_2014_6493_MOESM1_ESM.pdf]

**Additional File 1.** Comparison of the amino acid sequences of the different peptidase inhibitor families. The alignments were generated using the MUSCLE program. Rc, *Ricinus communis*; Pt, *Populus trichocarpa*; Mt, *Medicago truncatula*; Gm, *Glycine max*; Cs, *Cucumis sativus*; Ppe, *Prunus persica*; Fv, *Fragaria vesca*; At, *Arabidopsis thaliana*; Tc, *Theobroma cacao*; Vv, *Vitis vinifera*; Mg, *Mimulus guttatus*; Sb, *Sorghum bicolor*; Zm, *Zea mays*; Os, *Oryza sativa*; Bd, *Brachypodium distachyon*; Sm, *Selaginella moellendorffii*; Pp, *Physcomitrella patens*; Cr, *Chlamydomonas reinhardtii*; Vc, *Volvox carterii*; Csu, *Coccomyxa subellipsoidea*; Mp, *Micromonas pusilla*.

## A. I1 Kazal.

```

CsuKaz-1      -----TSGAQAPKAAAPTAQPPKAATPGQA
VcKaz-2      -----KSICQELAGAMPQGG
CrKaz-3      -----MSKSRR
PpKaz-3      -----MATSGW
PpKaz-2      -----MAALG
PpKaz-1      -----
SmKaz-1      -----MG
PpKaz-4      -----MATPGSK
RcKaz-2      -----M
PtKaz-5      -----M
PtKaz-3      -----M
PtKaz-4      -----M
RcKaz-4      -----M
RcKaz-3      -----
PtKaz-6      -----MA
AtKaz-2      -----
AtKaz-1      -----MKFKIRISAMST
ZmKaz-3      -----QRKLLKAPTGFHGRNFNRPHRRGLLLTDPEGRDLSRSPATP
OsKaz-1      -----MPPSY
BdKaz-1      -----
ZmKaz-2      -----
SbKaz-1      -----
ZmKaz-1      -----
PtKaz-2      -----M
PtKaz-7      -----M
TcKaz-2      -----M
RcKaz-5      -----MA
VvKaz-1      -----MEF
PtKaz-1      -----MIYPKKMMMMM
RcKaz-1      -----MIPIILFP
TcKaz-1      MLISFLVVSDEVNGTFCPVWIKILDGPPFFHPYYNFYPNWGLGFGFENLLQTLISIAAQM
GmKaz-3      -----MA
MgKaz-1      -----MQLFS
MtKaz-1      -----MA
MtKaz-2      -----
GmKaz-1      -----
GmKaz-2      -----
CsKaz-1      -----
FvKaz-2      -----MDL
FvKaz-1      -----MEHTHFL
PpeKaz-1     -----MEPQF
PpeKaz-2     -----MDTQFP

CsuKaz-1     PSPAPLPPCNCAGVAESLVCGFDDKT-----
VcKaz-2     SRFRGACDSFTLGAVFDLSSPDAAPLPWSFQSFTVNSQVDLERMRSTLGASLEYMEVDLQ
CrKaz-3     GLARLQPVRSRLVAFWLLAVSRLA-----
PpKaz-3     NPRRVHVFVVLVFTVFSFAAVVHARTEE-----NSFVVSRRHRAEGSVNVVGGGSPCD
PpKaz-2     RGPRCFEALLLLSVVVFHCGVVIQARTEENSFVVSQHGGGGGGGDSVNLVTRGASPCR
PpKaz-1     MESVRECPSSVLLLLLALSLMFAVSAEE-----LFLGKP
SmKaz-1     RKNSLLWALQLLAFLLALVSGDQDQ-----
PpKaz-4     QLRLLCFVASLMLFFANVNYAAVEETWSSVSGDAGEGLTVVLADTSPCHSPFETQYRQ
RcKaz-2     ATFKNIAPLCMMLLVFIVCVSVAQSQ-----
PtKaz-5     ATSKILAPLCLMVLVFGCLCLSMVESQ-----
PtKaz-3     ATSKIVAPLCLMVLVFGCLCLPKAQSQ-----
PtKaz-4     ATSKIVAPLCLMVLVFCCLSLMVKSQ-----
RcKaz-4     TTSFKKRTLLCMIVVVATCVLLLTNG-----
RcKaz-3     -----MMVVVVLGVCLTMVESK-----
PtKaz-6     TSIRVAQLCIVMVLVGLCLTMVQAQ-----
AtKaz-2     ---MPSLTLIRFLFLVLCCLIGLQAA-D-----
AtKaz-1     ISPSLAVIAFLFLIILLNLSSVFADPS-----T
ZmKaz-3     GMPSSRLVHLIILLATLSLLLAQTLAS-----
OsKaz-1     TPTARLRLVLFVFLASLSLLFAQTLASS-----
BdKaz-1     -TTARFLLFVAALSLLVLLPFPPTLAA-----
ZmKaz-2     -MPSSRLVHLIILLATLSLLLAQTLAS-----
SbKaz-1     -MPPSRLVHLIILLATLSLLLAQTLAT-----
ZmKaz-1     -----LASSSPAPASA-----

```

PtKaz-2 SKFSAIFTCVTIFLLSSLCPFIALSE-----T  
PtKaz-7 SKLSLISTLCIAIFLSSLCFQIARSE-----P  
TcKaz-2 SFPPIFRKPALSLLLLLLVVFPSSSS-----  
RcKaz-5 RSVPI LAPLCLLLALIGLCWPVEAQS-----KP  
VvKaz-1 NRSRLSSFVVIFIVFAICFPPTVTS-----  
PtKaz-1 MIPSTLLIHFLLIASIALFSAPTURS-----  
RcKaz-1 FSDSTFRRPILFLIFLIFSLCLIPVLR-----  
TcKaz-1 PCFTATALHILTFVLLLFCSAPIAQL-----Q  
GmKaz-3 GITKTSHFVSVLIVVALCVFPAATS-----DN  
MgKaz-1 CKPPSIFILAVLLTTLTPATVRSDPN-----  
MtKaz-1 GISAVIIVISIFLMVLVADDSSSS-L-----SS  
MtKaz-2 ---MPKFSIILTFIALIFIFPILTTA-----EN  
GmKaz-1 -MPKSSRFLVVAIAVAALCVILPVAAAA-----DL  
GmKaz-2 MPKFSRFLAVVAIAVAALCVILPVAAAV-----DL  
CsKaz-1 -----RSEDISS-----  
FvKaz-2 KSPKSHLLLFTVFIITILCSFSAVRS-----  
FvKaz-1 KSPISLILPILFTAFILGCFPTVRSE-----  
PpeKaz-1 AKSPIPLILLILFPILCSFPTVRS-----E  
PpeKaz-2 KSLISFFTLILFAFFIVLCSFPTVRSEL-----Q

CsuKaz-1 ----YTSSCAAGCANVGVKSQGACPAV-----GP-----AP-----G  
VcKaz-2 ASLGVVTTTHS---NTANGTSSNPRGGPNASASPKP-----VPR---EDC---  
CrKaz-3 -----GAADAAL-----SE-----ES---FDC---R  
PpKaz-3 SAVEVQSDEPLIQSVTSEDAADVASNLSKGPICRQ-----TT---MSC---P  
PpKaz-2 SGAEELRPEESLIRSUVSKAAADGANNVLIIEPCILQ-----TT---KSC---P  
PpKaz-1 NQGSAWELPL-QHAAPCDHFSLVCGEKGDNFKSSGLEADFNILSEGDPPIEKEPLC--T  
SmKaz-1 -----RLSIIIDSGSRVLDGGDAK-----IEC---P  
PpKaz-4 LSQGVASVAS---GGGASDTPTELCNHH-----MK-----KL---TSC---P  
RcKaz-2 -----ITINLCPGP-----MS-----PP---EGC---P  
PtKaz-5 -----SYGVCGEF-----DP-----EA---PRC---A  
PtKaz-3 -----DVCAGVE-----RP-----DPET---IPC---T  
PtKaz-4 -----SYGVCAGAA-----RP-----DPET---IPC---T  
RcKaz-4 -----VQAQNLCPG-----SE-----PP---PSCAGP  
RcKaz-3 -----VQVPNLCDLAKSASPGKDCS-----A  
PtKaz-6 -----RGSVNLCPG-----ST-----SR---GTCTGP  
AtKaz-2 -----DFPD-----KSRGDVCPR-----VK-----DR---GGC---T  
AtKaz-1 EGGEIIRLPS-EKINGEKNRGEFCEG-----IA-----KP---ASC---P  
ZmKaz-3 ----SAPVPA--AGSASAESGDPCAATVADG--EA-----DV---PLC---P  
OsKaz-1 -----AEAESVSDPCAAAPVSDG--GS-----EA---QLC---P  
BdKaz-1 -----SAAADPCAAAESDAASG-----EI---PLC---P  
ZmKaz-2 ----SAPVPA--AASASTESGDPCAAADVADG--EA-----DV---PLC---P  
SbKaz-1 ----SSPTPAAASAAAESGDPCAAADVADG--GDGD-----VP---LC---P  
ZmKaz-1 -----ATAGEPGDPCAAADVADG--DG-----DV---PLC---P  
PtKaz-2 GAGILIQEVT----REDGKG DACAG-----LK-----AP---ASC---P  
PtKaz-7 DAAILIQEVT----NKDGKGEACAG-----LK-----AP---ASC---P  
TcKaz-2 TGGSQQQLSA----TRLLSEADLCAS-----TP-----QP---SSC---P  
RcKaz-5 ENGMLEQIT----SKGNVDVCKG-----VT-----AP---ASC---P  
VvKaz-1 ----VIRLPS--DAVDGESDGLCGG-----SE-----VA---ASC---P  
PtKaz-1 -DANPIRLPTLDHNNNNDDDDACGEWS-----RR-----SPV---SSC---P  
RcKaz-1 -DPNP IRLPT-HIIDNQDDNVDPCEG-----YG-----RP---VSC---P  
TcKaz-1 DNSGSIRLPS-DGFTSAHENEVGCAR-----FT-----KP---ASC---P  
GmKaz-3 VASAVLGLPS---HVAGEGKNLCSAA-----AP---SSC---P  
MgKaz-1 ----FLKLPS-----DYENDVCPL-----NS-----DA---DTC---P  
MtKaz-1 SSSSVIRLPS---KVTAEGKNVCAGA-----VA-----S---SWC---P  
MtKaz-2 EESSVIRLPS-----QNVCS-----VT-----TP---SSC---P  
GmKaz-1 EDPGVLRLPS-----DSLGC-----KT-----TP---SSC---P  
GmKaz-2 EDPGVLQLPS-----ESLCG-----KT-----MP---LSC---P  
CsKaz-1 ----AIRLPS--EATNNHGDI DLCS-----VS-----AP---SYC---P  
FvKaz-2 --DPIIKLPS-----DSDSDSGACGSSSL---SR-----SP---VVC---P  
FvKaz-1 QEPSFIKLPS-----ESQPADVCPVV-----VK-----SPVHA--LSC---P  
PpeKaz-1 HESTIIRLPS-----DSQSADRCGTPSSPLSSS-----SSPWSR--PMC---P  
PpeKaz-2 TESTIIRLPS-----ESEPADACAGS-----IR-----SP---SLC---P

CsuKaz-1 VQCADS-TEVCGDGVTYSNCT- PKSKGVAI INNGPCK-----  
VcKaz-2 -VCAEVYKPVCGSDGQDYSSAC-HAWCAGLNSWAAGTCNGTGVD-----ASNGG  
CrKaz-3 AGCKRAFKPACGADGRTYASACL-AKCGVQVAHHGPC-----  
PpKaz-3 VKCFRS-YPVCGTDKVTYRCGAADANCAGVEVAYDGF CNLWEGDR-----NVGSS  
PpKaz-2 VKCVRT-DPVCVGVKVTYWC GAADAKCAGVEVAHDGSCNLWELGT-----ATSST  
PpKaz-1 VNCVRA-DPVCVGS DGVTYWCGVAEAKCAKVEVAHDGYCDI-----W-----NGGTK  
SmKaz-1 VSCLRA-DPVCVANGVTYWCGRDAACDGV ELSHTGYCSP---G-----N-GGA  
PpKaz-4 VQCFRA-DPVCVGT DNI TYWCGAADAKCAGVEVAHDGYC NVWELDA-----NVGST  
RcKaz-2 IACLVP-DPVCVANGVTYWC GCPDALCAGVRVVKFGEC-----  
PtKaz-5 VRCSVP-DYVCGTDGVTYTCGCKDAFCNGVDVVKKGK-----  
PtKaz-3 INCFVP-DPVCVGT DGVTYSCGLDAFCHGVVDVKEGEC-----  
PtKaz-4 INCLVA-DPVCVGT DGVTYTCGCDAFCHGVVVKKGEC-----  
RcKaz-4 INCFRP-DPVCVANGVTYWC GCPDAACAGV PVKLEAC-----  
RcKaz-3 IRCLRY-DPVCVNGVTYGC GCP EANFYAVRVVKLGAC-----  
PtKaz-6 INCFRA-DPVCVANGVTYGC GCP EAAARVRVVKLGAC-----  
AtKaz-2 INCFRA-DPVCVGT DGVTYWC GCP DAACHGARVVKKGACDT---G-----N-AGS  
AtKaz-1 VQCFRP-DPVCGEDSVTYWC G CADALCHGVRVVKQGACDV---G-----N-GVG  
ZmKaz-3 VRCFRP-DPVCVADGVTYWC GCP EATCAGARVARRGYCEVSGMGVADPRHHGRAQRGGA

OsKaz-1 VRCFRP-DPVCGADGVTYWCGCPEAACAGARVARRGYCEV---G-----A--GS  
BdKaz-1 VRCFRP-DPVCGADGVTYWCGCPEAVCAGARVARRGYCEV---G-----A--GS  
ZmKaz-2 VRCFRP-DPVCGADGVTYWCGCPEATCAGARVARRGYCEV---G-----AGSGS  
SbKaz-1 VRCFRP-DPVCGADGVTYWCGCPEATCAGARVARRGYCEV---G-----A--GS  
ZmKaz-1 VRCFRP-DPVCGADGVTYWCGCPEAACAGARVARRGYCEV---G-----A--GS  
PtKaz-2 INCFRA-DPVCGVDGVTYWCGCADALCSGTRVDKLGACEV---G-----S--GGS  
PtKaz-7 INCFRA-DPVCGFDFGVTYWCGCADAMCSGTRVAKLGACEV---G-----S--GGS  
TcKaz-2 INCFRA-DPVCGDDGVTYWCGCADAHACAGAKVVKIGFCEV---G-----NSGGN  
RcKaz-5 INCFRA-DPVCGVDGRVTYWCGCDDALCSGTTVAKIGACDM---G-----N--GGS  
VvKaz-1 VKCFRP-DPVCGVDGVTYWCGCPEARCAGTAVAHFGICEV---G-----N--GSA  
PtKaz-1 VKCFRP-DPVCGVDGVTYWCGCDDARCACTKVKKGFCEV---G-----N--NGA  
RcKaz-1 VNCFRP-DPVCGVDGVTYWCGCRDAWCACTKVKKGFCEV---G-----N--NGA  
TcKaz-1 VNCFRP-EPVCGVDGVTYWCGCADALCAGTRVAKLGFCDV---G-----N--GGS  
GmKaz-3 VKCFRT-DPVCSDGVTYWCGCSEAYASAIKLGACEV---G-----N--GGS  
MgKaz-1 VKCFRT-DPVCVDGVTYWCGCAEAHCAGARVKKFGFCEV---G-----N--GGP  
MtKaz-1 VKCFRT-DPVCVDGVTYWCGCAEAACAGVKVKGKMGFCEV---G-----S--GGS  
MtKaz-2 AKCFRT-DPVCADGVTYWCGCAEAACAGAKVAKLGFCEV---G-----N--GGS  
GmKaz-1 AKCFRA-DPVCADGVTYWCGCAEAACAGVEVAKLGFCEV---G-----N--GGS  
GmKaz-2 AKCFRA-DPVCADGVTYWCGCAEAACAGVEVAKLGFCEV---G-----N--GGS  
CsKaz-1 VKCFRT-DPVCVDGVTYWCGCADALCSGTVKAKMGFCEV---G-----N--GGS  
FvKaz-2 VNCFRP-DPVCVDGVTYWCGCPDAQCAGVKVAKLGFCEV---G-----N--GGS  
FvKaz-1 VNCFRP-DPVCVNGVTYWCGCQEAQCAGVKVAKLGFCEV---G-----N--GGA  
PpeKaz-1 VNCFRP-DPVCVDGVTYWCGCQEAQCAGVKVAKLGFCEV---G-----N--GGS  
PpeKaz-2 VNCFRP-DPVCVDGVTYWCGCQDAQCAGVKVAKLGFCEV---G-----S--GGS  
\* . \* . \*

CsuKaz-1 -----PVTA-----  
VcKaz-2 FR----SAETSESNSRWSW-----GLD-----  
CrKaz-3 -----  
PpKaz-3 TALY--AVQSLQLVHMLWLVF-----AGSF-----  
PpKaz-2 TALY--ALHSLQLNRMFCLVI-----AGLF-----  
PpKaz-1 ANLGLHAAQSLQLVHMVWLVL-----AGLL-----  
SmKaz-1 MTIAITISSNLVGISVVRLLVP-----CGCPQQS-----  
PpKaz-4 TAVR--AAQSLQLVHMLWLVV-----AGLL-----  
RcKaz-2 -----  
PtKaz-5 -----  
PtKaz-3 -----  
PtKaz-4 -----  
RcKaz-4 -----  
RcKaz-3 -----  
PtKaz-6 -----  
AtKaz-2 ASV---PGQALLLIHIVWLFL-----LGLS-----  
AtKaz-1 LSV---PGQALLLIHIVWMLL-----LGFS-----  
ZmKaz-3 GAG---AGQQLLCRGLRRAAVRCGRPLLDGSGSLQMALN-----  
OsKaz-1 APV---SGQALLLVHIVWLVFV-----LGAA-----  
BdKaz-1 APV---SGQALLLVHIVWLVFV-----LGAA-----  
ZmKaz-2 APV---SGQALLLVHIVWLVFV-----LGAA-----  
SbKaz-1 APV---SGQALLLVHIVWLVFV-----LGAA-----  
ZmKaz-1 APV---SGQALLLVHIVWLVFV-----LGAA-----  
PtKaz-2 SSL---PGQALLLIHIVWLIL-----LGFS-----  
PtKaz-7 ASL---PGQALLLIHIVWLIL-----IGFS-----  
TcKaz-2 GSF---PGQALLLVHILWLIV-----LGFS-----  
RcKaz-5 ASL---PRQALLLVHILWLIL-----LGFS-----  
VvKaz-1 -----GQALLLVHIVWLMV-----LGFS-----  
PtKaz-1 A-----AQALLLVHIVWLIV-----LGFS-----  
RcKaz-1 A-----AQALLLVHIVWLIV-----LGFC-----  
TcKaz-1 ASF---PGQALLLVHIVWLIL-----LGFS-----  
GmKaz-3 VTL---SGQALLLVHIVWLIV-----LGFS-----  
MgKaz-1 A-----GQALLLVHIVWLIL-----LGVF-----  
MtKaz-1 APL---SAQAFLLLVHIVWLIV-----LAFS-----  
MtKaz-2 ATF---PGQALLLVHIVWLIV-----LGFS-----  
GmKaz-1 API---PGQALLLVHIVWLIV-----LGFS-----  
GmKaz-2 API---PGQALLLVHIVWLIV-----LGFS-----  
CsKaz-1 API---PAQALLLVHILWLII-----LGVV-----  
FvKaz-2 AP-----QALLLVHIVWLIV-----LGISKGVGYSDFLYEQAVSQRSLI  
FvKaz-1 APL---SAQALLLVHIVWLIV-----LGFS-----  
PpeKaz-1 APL---SAQALLLVHIVWLIV-----LGFS-----  
PpeKaz-2 APH---SAQALLLVHIVWLIV-----LGFS-----

CsuKaz-1 -----  
VcKaz-2 -----RI-----  
CrKaz-3 -----  
PpKaz-3 -----VVLGML-----  
PpKaz-2 -----VALRVV-----  
PpKaz-1 -----IVIGLL-----  
SmKaz-1 A-----CTKGI-----  
PpKaz-4 -----IVLGSV-----  
RcKaz-2 -----  
PtKaz-5 -----  
PtKaz-3 -----  
PtKaz-4 -----  
RcKaz-4 -----

RcKaz-3 -----  
PtKaz-6 -----  
AtKaz-2 -----LLVGGF-----  
AtKaz-1 -----ILFGLF-----  
ZmKaz-3 -----SCRDLFW-----  
OsKaz-1 -----VLLGFL-----  
BdKaz-1 -----VLLGFL-----  
ZmKaz-2 -----VLLGFL-----  
SbKaz-1 -----VLLGFL-----  
ZmKaz-1 -----VLLGFL-----  
PtKaz-2 -----LLFGFF-----  
PtKaz-7 -----LLFGFF-----  
TcKaz-2 -----VLFGLI-----  
RcKaz-5 -----LLFGLF-----  
VvKaz-1 -----VLFGLF-----  
PtKaz-1 -----ILFGLF-----  
RcKaz-1 -----VLFGLF-----  
TcKaz-1 -----VLCGLF-----  
GmKaz-3 -----VFFGLF-----  
MgKaz-1 -----VLFGLL-----  
MtKaz-1 -----VFFGLF-----  
MtKaz-2 -----VLFGLF-----  
GmKaz-1 -----VLFGLF-----  
GmKaz-2 -----VLFGLF-----  
CsKaz-1 -----VLFGLF-----  
FvKaz-2 QRLLVLVFPVFRGTYVEHGGTFTGSSTGCVGGKTDSDRFGCREDIGLQKAGAGFAAGRTLA  
FvKaz-1 -----VLFGLF-----  
PpeKaz-1 -----VLFGLF-----  
PpeKaz-2 -----VLFGLF-----

CsuKaz-1 -----  
VcKaz-2 -----  
CrKaz-3 -----  
PpKaz-3 -----  
PpKaz-2 -----  
PpKaz-1 -----  
SmKaz-1 -----  
PpKaz-4 -----  
RcKaz-2 -----  
PtKaz-5 -----  
PtKaz-3 -----  
PtKaz-4 -----  
RcKaz-4 -----  
RcKaz-3 -----  
PtKaz-6 -----  
AtKaz-2 -----  
AtKaz-1 -----  
ZmKaz-3 -----  
OsKaz-1 -----  
BdKaz-1 -----  
ZmKaz-2 -----  
SbKaz-1 -----  
ZmKaz-1 -----  
PtKaz-2 -----  
PtKaz-7 -----  
TcKaz-2 -----  
RcKaz-5 -----  
VvKaz-1 -----  
PtKaz-1 -----  
RcKaz-1 -----  
TcKaz-1 -----  
GmKaz-3 -----  
MgKaz-1 -----  
MtKaz-1 -----  
MtKaz-2 -----  
GmKaz-1 -----  
GmKaz-2 -----  
CsKaz-1 -----  
FvKaz-2 WTKKAGAVAW  
FvKaz-1 -----  
PpeKaz-1 -----  
PpeKaz-2 -----

## B. I3 Kunitz-P.

AtKun-2 -----MKNPSVIS---FLIILLFAATICHTGN-----  
AtKun-1 -----MKATISIT---TIFLVVALAAPSLARP-----  
MtKun-7 -----  
MtKun-11 -----NVDDSVRICOQSTAVKCLERFAIDVYHIFEAKYLGMPNTNEYIERVL  
MtKun-9 -----MKPTLVTT---LCFLLFSFTIYFPLPF-----T  
MtKun-14 -----MKPTLVTT---LCFLLFSFTIYFPLPF-----T  
MtKun-20 -----MKSTLFT---FSLLLFSFTYFPLAFT-----  
MtKun-24 -----MKSTLF---TFLLLFSFTYFPLAFT-----  
MtKun-15 -----MKPTFLT---LSLILFALTICFSLAF-----  
MtKun-16 -----MKPTFLT---LSLLLALATYFPLAF-----  
MtKun-19 -----MNSVCSLTILSLSFLFVFITNLSLVF-----S  
MtKun-17 -----MNPILSLT---ISFLLFAFITNLSFNPN-----  
MtKun-22 -----MKHVLST---LSFLLFVFTTNLSLAF-----S  
MtKun-25 -----MKHLLSLT---LSFFIFVFITNLSLAT-----  
AtKun-3 -----MEKLTLSFI---TLTVLSAIFTAASAAD-----  
BdKun-1 -----MKILLPL---LQVLAIALCLANDAT-----  
MtKun-1b EPIYYVRFQKASTFAQSNQDLKTMKFIQLCF---LISLLVLLNTKALQGA-----  
MtKun-1a -----MKFIQLFC---FLSLLVLFNTKPLQGA-----  
MtKun-4 -----MKFIQLFC---FLSLSALFNTKALQGD-----  
MtKun-2 -----MSIRPLT---IFI IAHVLLFMITTSV-----  
MtKun-3 -----MSTRSLT---IFI IAHVLLFMITTSV-----  
MtKun-26 -----MSMRLSI---RTLII LAHVCLFITTT-----  
FvKun-3 -----SMISSIFMAVETINQT-----  
FvKun-4 -----MMKSMKMI---GSLSCCMWLVMMAMVTS-----  
FvKun-5 -----MSMKLIG---SIWLVMMAMATVAQADN-----  
MtKun-27 -----MSTTLKITS---LSLMLCLFMSIKTLAQ-----  
MtKun-28 -----MTTRMIKITS---LSLMLWLFMTIPTSAQ-----  
BdKun-2 -----MSSSPRARLLLI---SLVAAATLLVSCRGA-----A  
OsKun-1 -----MVSRLR---PLILLSLAI SFSCSA-----  
SbKun-1 -----MGIPRAARLLV---LVSVLAALISLSCGAAA-----  
ZmKun-1 -----MPMSIPRAAHLV---LLSVLAISLSSCGAAA-----  
AtKun-4 -----MTKTTKTMNPKFYLVLAALTAVLASNAY-----  
MtKun-5 -----MKLHFPL---LFLLLTFTTKPLQGA-----  
MtKun-8 -----MKSTFL---AFLLLIALTSQPLLSS-----  
MtKun-12 -----MKNLLA---FFLFTFLSSQPLLGA-----A  
MtKun-21 -----MKNLLA---FFLFTFLSSQPLLGA-----A  
MtKun-10 -----MKCTIML---ALLLLALSSQPLFVS-----S  
MtKun-18 -----MKGTML---AFLLLFALSSQPLLGS-----A  
MtKun-13 -----MKTSFLA---FSILCLAFICKTIAA-----  
MtKun-23 -----MKTSFLA---FSIIFLAFICKTFAA-----  
AtKun-5 -----MSSLLY---IFLLAVFISHRGVTT-----  
MtKun-6 -----MKSICI---LLAVLFALSTQPLLGE-----A  
FvKun-1 -----MRFCTLASQVLI---CYLSLLAFRGKPLLVA-----VHA  
FvKun-2 -----MFLSRFPVRLTLASQVLI---CYLSLLAFRGKPLLVA-----VH  
VvKun-1 -----MKTSSLLL---FSLFLIALAFNPLPGA-----A  
VvKun-4 -----MKTTLFL---FSLLLIALAVKPPFVA-----A  
VvKun-2 -----MLSKTSSRHQMVSHISSKRSTTMKTTSSL---FSLLLIALAVKPPFVA-----A  
VvKun-3 -----

AtKun-2 -----EPVKDTAGNPLNTREQYFIQPVKTE---SKNG-----GGLVPAAITVL-----PF-  
AtKun-1 -----DNHVEDSVGRLLRPGQTYHIPAN---PETG-----GGIFSNS-EEI-----  
MtKun-7 -----MDTLGAPLRSGESYQISVVV---ADHP-----GALTIGK-TDD-----LD-  
MtKun-11 QMGEAQLRDKNGNPILVSKKYIWPAAAA---DGS-----GGLRLNE-TEQ-----  
MtKun-9 HANDFIVKDFGNPVPVPSGSYYIWPDY---LVSG-----GELRLGE-TEN-----ST-  
MtKun-14 HANKIIVKDFGNPVPVPSGSYYIWPDY---LING-----GELRLGE-TEN-----ST-  
MtKun-20 ---ETVEDINGNPVFPGGKYYIAPLIS---KGG-----GGLKLGK-TGD-----SE-  
MtKun-24 ---ETVEDINGNPVFPGGKYYIAPLIS---KGG-----GGLKLGK-TGD-----SE-  
MtKun-15 AQVSEQVFDITNGNPIFPGGTFYIMPSIF---GAAG-----GGLRLGK-TKN-----SK-  
MtKun-16 ---TEQVRDSNGNPIFPSSRFVVKPSIF---GAAG-----GGVCLGE-TGN-----SS-  
MtKun-19 NDNVEIVVDKNGIPLIPGTSYYISPAN-----TG-----GRITLKG-TVD-----SD-  
MtKun-17 ---AAQVLDIHGTPLIPGSQYYIFPASE---NPNS-----GGLTLNK-VGD-----LE-  
MtKun-22 NDAVEQVLDINGNPIFPGGKYYILPAIR---GPLG-----GGLRLGK-SSN-----SD-  
MtKun-25 SNDVEQVLDINGNPIFPGGQYYILPALR---GPG-----GGVRLGR-TGD-----LK-  
AtKun-3 ATPSQVVLDIAGHPVQSNVQYYIIPAKA---IGTG-----GGLIPSN-RNL-----STQ  
BdKun-1 ---QLAHDITQKTLRESYIIPAKA---QSG-----GGLTATP-NGQ-----R--  
MtKun-1b ---KPDVVDRHGKPLESGKYYVWQFW---AHD-----GGLTLSS-TRN-----KT-  
MtKun-1a ---EPEAVVDKQGNPLKPGEGYVFPPLW---ADN-----GGITLGH-TRN-----KT-  
MtKun-4 ---KPEAVVDKQGNPLKPGEGYVFPPLW---ADN-----GGITLQK-TRN-----KT-  
MtKun-2 ---AQIVIDTSGEPVEDDEEYFIRPAI---TGNG-----GGSILVTRNGP-----  
MtKun-3 ---AQIVIDTSGEPVEDDEEYFIRPAI---TGNG-----GGSILVTRNAP-----  
MtKun-26 ---TIAQFVLDITVGEVPEGDEEYFIRPVI---TNKG-----GRSTMVSRNES-----  
FvKun-3 ---SPVFDTSKALKSGIDYIKPAG---TDKG-----GRLTLIN-REP-----KL-  
FvKun-4 AQDNAPVLDITSGQALQSGVDYIIPAKA---TDIG-----GRFTLID-RND-----S--  
FvKun-5 ---AAVLDITGQALQSGVDYIIPAKA---TDNG-----GRFTLID-RNN-----S--  
MtKun-27 ---SENEKILDTKGHPLEGRKEYIIPAKA---TDSG-----GRFTLID-RNG-----S--  
MtKun-28 ---PENEVLDLITGRPLESGRKYIIRSDV---SDFG-----GRITLVN-KNG-----S--  
BdKun-2 SPPPPVYDITDGHELADTSYHVLPLI---RRGGPYGARRGGLTLAPLHGG-----QR-  
OsKun-1 ---APPVYDITDGHELSADGSYVLPASP---GHG-----GGLTMAP-RVL-----P--  
SbKun-1 ---AALPVYDITDGHELSADADYVLPVPHG---SGSG-----GGLTMAP-NGL-----R--  
ZmKun-1 ---ALPVYDITDGHELSADADYVLPAPPRGSGGGG---GGLTMAP-KGL-----HP-

AtKun-4 ----GAVVDIDGNAMF-HESYYVLPVI----RGRG-----GGLTLGAG-RGG-----QP-  
MtKun-5 -EQPEEVRDTSGNLVRNSINYFILPSSIQ--CGTR-----CEMALLNTNKT-----  
MtKun-8 --SLEHVVDITGKNLRANAYYNVLLSMPYTNRSRSP-----EGLGLSNNIGQ-----P--  
MtKun-12 EASNEQVVDTLGKKLRADANAYIIPVPIYKCGPYGKCRSS-GSSLALA-SNG-----KT-  
MtKun-21 EASNEQVVDTLGKKLRADANAYIIPVPIYKCGPYGKCRSS-GSSLALA-SIG-----KT-  
MtKun-10 KTSLNQVLDISGKKLRDSDYYIIPA-----NG-----GDISLES-SIG-----ES-  
MtKun-18 EASPDQVLDISGKKLRADTNYIIPAKPFTTTCDFVSCFNS-GGIALET-VGE-----S--  
MtKun-13 ---PEPVLDISGKQLTTGVKYYILPVI----RGGK-----GGLTVAN-HGE-----NNQ  
MtKun-23 ---PEPVLDISGKVTGKYYILPV----IRGG-----GGLTVVN-ENNLNGNNT-  
AtKun-5 EAAVEPVKIDINGKSLTGVNYYILPVI----RGRG-----GGLTMSN-LKT-----ET-  
MtKun-6 DASPEQVVDTEGKKVRAGVDYIIRPVPTPCDGRGPCVVGSGFVLIAR-SPN-----ET-  
FvKun-1 DSDPAPVLDIKGHNIQTGEVYILPVI----RGRG-----GGLTLAT-TGN-----RNR  
FvKun-2 AADPAPVRDIKGNLQGTGEVYILPVI----RGGK-----GGLTLAS-NRN-----KTI  
VvKun-1 EAAPDPVLDIEGKQLRSGVDYYILPVI----RGRG-----GGLTVAS-VRN-----KT-  
VvKun-4 ESSPDVLDTEGKQLWSGVDYYILPVI----RGRG-----GGLTLAS-TGN-----EN-  
VvKun-2 ESAPDPVLDTEGKKLRSGVDYYILPVF----RGRG-----GGLTLAS-TGN-----ET-  
VvKun-3 -----MSGVDYYILPVF----RGRG-----GGLTLAS-TGN-----ET-

: :

AtKun-2 --C-PLGITQTLLPYQPGLPVSF-VLALG-----VGST----VMTSSA-VNIE-FKS  
AtKun-1 --C-PLDIFQSNPLDLGLPIKF-KS-----ELWF----VKEMNS-ITIE-FEA  
MtKun-7 --C--VYLVSSQDDSSHGLSVKF-----HSTD-----ILG  
MtKun-11 --C-PLVVQAFSEDEVKSLPLKF-IPTEN-----INDF-----IFTGYTSLDIV-FEK  
MtKun-9 --C-PFTVLQDYSNLGPGLPVKF-TPQNQ-----TSGDDP--ITLSLH-IDIA-FEN  
MtKun-14 --C-PFTVLQDYSNLGPGLPVKF-TPQNQ---TS--SDDP----ITLMLP-IEIT-FEN  
MtKun-20 --C-PVTVLQDFSEVVRGLPVRF-TIIV-----KRGV----IFTTDE-VDIE-FVK  
MtKun-24 --C-PVTVIQDFSEVVRGFPVRF-IIRV-----RRGV----IFTTDE-LDIE-FVK  
MtKun-15 --C-PLTVLQDYSEVNVNGLPVKF-TRLEA-----GHDI----ISTNTA-LDIA-FTT  
MtKun-16 --C-PLTVLQDYSEVNVNGLPVKFSTDAEI-----FIDL----ISTDTSRVDIV-FPE  
MtKun-19 --C-SFLVLQDDEKMIYGRQVKF-SLSVG----II--PASL----IFTNTA-LDIE-FVY  
MtKun-17 --C-PVTVLQNNAMI--GLPVKFTVPEN-----NTGN----ILTGTD-LEIE-FTK  
MtKun-22 --C-EVTVVQDYNEVINGVPVKF-SIPEI-----SPGI----IFTGTP-IDIE-FTK  
MtKun-25 --C-PVTVLQDRREVKNGLPVKF-TIPGI-----SPGI----IFTGTP-LEIE-YTK  
AtKun-3 DLCLNLDIVQSSSPFVSGPLVTF-SPLNT-----KVKH----VQLSAS-LNLE-FDS  
BdKun-1 --C-LAFVVFQVRDETFGLGDLRF-TPLPP-----NHSADP-IRLSTD-IWIE-FRN  
MtKun-1b --C-PLDVIRNPKELGS--PVYFSA-----GFKH----IPTQTD-LSIK-IRF  
MtKun-1a --C-PLDVIRNPAIGT--PVYF-SAS-----GLDY----IPTLTD-LTIE-IPV  
MtKun-4 --C-PLDVIRNPEAIGS--PVYF-YEY-----EHDY----IPTLTD-LTVE-IPV  
MtKun-2 --C-PLHVGLGNSEGTLMGAVKF-TPFAP-----RHDDDDDDVRLNRD-LRVT-FQG  
MtKun-3 --C-PLHVGLGNSEGTLMGAVKF-TPFAP-----RHDDDDDDVRLNRD-LRVT-FQG  
MtKun-26 --C-PLHVGLLELTGLGRGLVVKF-TPFAP-----HHDFDD--VRVNRD-LRIT-FQA  
FvKun-3 --S-PLYVQGQNIS--GLPFHF-KPFFT-----GETV----VRESRD-QMII-SSV  
FvKun-4 --C-PLYVQGQNTSGSEDFPVTF-APFVE-----GETV----VREGRD-QKIT-FSA  
FvKun-5 --C-PLYVQENTSGPEGFPVIF-APFEE-----GETV----VREGRD-QKIT-FSA  
MtKun-27 --C-PLYVQENTDLGKGLPVIF-TPFAK-----EDKV----IKDSRD-FKVK-FSA  
MtKun-28 --C-PLYVQETTDFQGQLSVIL-TPLEN-----DDTV----VKVNRD-FKVK-FSS  
BdKun-2 --C-PLFVAQDASREHLGGLPVRF-APHGKASASAD--PTTV----VRVSTD-VRVS-FRA  
OsKun-1 --C-PLLVAQETDERKGFVRF-TPWGG-----AAAPEDRT----IRVSTD-VRIR-FNA  
SbKun-1 --C-PLFVAQEADPLRKGFPVRF-TPLPQ---Q---GDRT----VRVSTD-VGVH-FAA  
ZmKun-1 --C-PLFVAQETDPLRKGFPVRF-APLQQ-----DQGGSDRAVRVSSD-VGVH-FAA  
AtKun-4 --C-PYDIVQESSEVDEGIPVKF-SNWR-----KVAF----VPESQN-LNIE-TDV  
MtKun-5 --C-PLDVVEEEEAM---QFSF-VPFNF-----KKGV----IRVSTD-LNVI-HSF  
MtKun-8 --C-PLDVIV--VSRYQSLPIRF-TPLNL-----KKGV----IRVSTD-LNIM-FRS  
MtKun-12 --C-PLDVVV--VDRYQALPLTF-IPVNP-----KKGV----IRVSTD-LNIK-FSS  
MtKun-21 --C-PLDVVV--VDRYQALPLTF-IPVNP-----KKGV----IRVSTD-LNIK-FSS  
MtKun-10 --C-PLHVVVVKHRQGLGFPRL-AP-----VKGD----IRVSTD-LNIM-LGN  
MtKun-18 --C-PLDVVV--VKHNQGLPLRF-TPVNN-----KKGV----VRVSTD-LNIK-FSN  
MtKun-13 T-C-PLYVVQEKLEVKNGEAVTF-TPYNA-----KQGV----ILTSTD-LNIKSFTV  
MtKun-23 --C-PLYVLEKLEVKNGQAVTF-TPYNA-----KQGV----ILTSTD-LNIKSFTV  
AtKun-5 --C-PTSVIQDQFEVSGQLPVKF-SPYD-----KSRT----IPVSTD-VNIK-FS-  
MtKun-6 --C-PLNVVV--VEGFRGQGVTF-TPVNP-----KKGV----IRVSTD-LNIK-TSL  
FvKun-1 SIC-PLDVVQEQEVSNGPLPLTF-SPVNL-----KIGV----VRLSTD-LNIK-FST  
FvKun-2 G-C-PLDVVQEQEVSNGPLPLTF-SPVNL-----TKGV----VRLSTD-LNIK-FST  
VvKun-1 --C-PLDVVQDKLEVSHGLPLTF-TPVNP-----KQDV----IRVSTD-HNIK-FSA  
VvKun-4 --C-PLDVVQEQEVSNGPLPLTF-TPVNP-----KKGV----IRVSTD-HNIK-FSA  
VvKun-2 --C-PLDVVQEQEVSNGPLPLTF-TPVNP-----KKGV----IRVSTD-HNIK-FSA  
VvKun-3 --C-PLDVVQEQEVSNGPLPLTF-TPVNP-----KKGV----IRVSTD-HNIK-FSA

. : . :

AtKun-2 NIW-PFCKEFSK-FWEVDDSSS-----APKEPSILIGGKMGR-----NSSF  
AtKun-1 PNW-FLCPKESK-GWRVVYSEE-----FKKSLIISTGSSNPSG-----F  
MtKun-7 S--PACVESA--KWLVFVDSELD-----PLPIHYVIGGPNYPSHTEIFDGTFF  
MtKun-11 K---TKCAESS--KVVVVKG-----GFMEPWIGIGGGVNGKSV--IDGLF  
MtKun-9 K---PDCAESS--KWLVEAEN-----EYPTPWLAIIDGTGKKVYD---DGMF  
MtKun-14 K---PDCAESS--KWLVEAEN-----EYPTPWWTIDGTNKNVY---DGYF  
MtKun-20 K---PKCAESA--KWLVAHD-----DFPTSWVIGDNIDAF-----QKGF  
MtKun-24 K---PKCAESA--KWLVAHD-----DFPTSWVIGDNIDA-----FQKGF  
MtKun-15 K---PDCAESS--KWLVDVDFN-----KLTGPVWVIGGTEDNEDI-----  
MtKun-16 K---PECAESS--KWLIED-----DFPRPWWVIGGIEDYIGK-HIIDGKF  
MtKun-19 K---DSCVESS--KWLIFVDNV-----NNNKSFVIGGPNYPSHTQILNGKF  
MtKun-17 K---PDCAESS--KWLIFVDN-----NTQLSCVIGGATNYHGI-ETISGKF  
MtKun-22 K---PNCVESS--KWLIFVDS-----VIQKACVIGGPNYPSG-RTLSGTF  
MtKun-25 K---PSCAEST--KWLIFVDN-----VIGKACVIGGPNYPSG-QTLKGF

AtKun-3 TV--WLCPSDK--VWRIDHSV-----QLRKSFVSI GGQKGG-----NSWF  
BdKun-1 LS--NFCVERL--DWHLTNKSP-----ETAGLHVAAAGNEDGTRS-----FGLF  
MtKun-1b RS--SSCNQSK--VLKLSKE-----GGGFWFLSTGGVAGDV-----VSKF  
MtKun-1a LG--SPCNEPK--VWRLKLV-----GGGFVFWSTGGAAGDL-----VSKF  
MtKun-4 LG--SPCSERK--VWKLSEKGT-----RARFWFVSTGGFPGNL-----FSQF  
MtKun-2 F---TGCGQST--DWRLGEKDA-----TSGRRLIVTGRDNGAGSH-----GNFF  
MtKun-3 F---TGCGQST--DWRLGEKDA-----TSGRRLIVTGRDNGAGSH-----GNFF  
MtKun-26 S---SSCVQST--EWRLGEKDT-----KSGRRLIITGTD SATNGS---YGNFF  
FvKun-3 S---THCRRFS--SWSIVTANA-----EDQRKLI VMREPARGKVP--DSI--YF  
FvKun-4 V---TTCVQST--TWKVGEKQS-----ETQRRLIVTG-IDQNEGIAGPAGNYF  
FvKun-5 S---TTCVQST--TWKLGEKQA-----ETQRRLIVTGSDVEVESPR--GATSNYF  
MtKun-27 S---SICVQST--EWKLGDRDT-----KSGRRVI IAGSD-----GSYF  
MtKun-28 S---SSCGQST--EWKLGDRDN-----RSGRRLI IAGSD-----GNSF  
BdKun-2 Y---TTCVQST--EWHVESGKNI-----LGARRHVVTGPPVGGPSPISGRENAF  
OsKun-1 A---TICVQST--EWHVGDDEP-----LTGARRVVTGPLIGPSPSGR--ENAF  
SbKun-1 V---TTCVQTT--EWHVSGD DALATAPAPAPVLSGRRRLVLTGPVR--SPSP--NGREKVF  
ZmKun-1 A---TTCVQTT--EWHVSGDGAAP-----RSGRRLVLTGPVLS SSP--NGREKVF  
AtKun-4 GA--TTCIQST--YWRVGEFDH-----ERKQYFV VAGPKPEGFGQ--DSLK SFF  
MtKun-5 P---TNCSTSSVTVWKVDKVDV-----ATSQR FVTGGVQGNPGR--ETVDNWF  
MtKun-8 N---SSCPYHTT--VWKLDRFDA-----SKGKSFVTTDGFIGNPGP--QSI SNWF  
MtKun-12 R---ATCLHHS M-VWKLDRFNV-----SKRQWFITIGGVAGNPGW--ETINNWF  
MtKun-21 R---ATCLHHS M-VWKLDRFNV-----SKRQWFITIGGVAGNPGW--ETINNWF  
MtKun-10 YD--DRCPNYSV--VWKIDPY-----SKEATFVTNGILGHPGS--NSIHSWF  
MtKun-18 DAYDSRCPNHSL--VWKIDPF-----SKEATFVTNGVLGNPGS--NTIHNWF  
MtKun-13 K---TKCPQTQ--VWKLLEK-----LTGVWFLATGGVEGNPSM--ATVGNWF  
MtKun-23 K---TTCAQSQ--VWKLNKV-----LSGVWFLATGGVEGNPGF--DTIFNWF  
AtKun-5 ---PTS-----IWELANFDE-----TTKQWFISTCGVEGNPGQ--KTVDNWF  
MtKun-6 N---TSCEEST--IWLDDFDS-----STGQWFVTTGGV LGNPGK--DTVDNWF  
FvKun-1 SAAVTICLN TSK--VWKL DN LDE-----STGQRFVTTGGVEGNPGP--KTI SNWF  
FvKun-2 SAAVTLCPQTSK--VWKLDEVEDE-----STGQRSVTTGGVEGNPSP--KTL MNWF  
VvKun-1 A---TICAQST--VWKLEYDE-----STGQRFIT TGGVEGNPGR--GTLSNWF  
VvKun-4 S---TTCVQST--LWKLEYDE-----SSGQRFVTTGGVEGNPGH--ETLDNWF  
VvKun-2 S---TTCVQST--LWKLEYDE-----SSGQRFVTTGGVEGNPGR--ETLDNWF  
VvKun-3 S---TTCVQST--LWKLEYDE-----SSGQRFVTTGGVEGNPGR--ETLDNWF

AtKun-2 KIEK--AGEGARANV-----YKLTTFYGT-----VGAIP--GVWL-----  
AtKun-1 QIHR--VDGGA-----YKI-VYCTNISTTT-----CMNV--GIFT--DIS-----  
MtKun-7 SIQR--SELFPLA-----YTL-NYCRMDH-----CSYV--GINKVLIGNE-----  
MtKun-11 KIETIRSF RG-----YKL-VFCPTISDPTGQ-----CNNI--GRFF--DNE-----  
MtKun-9 EIIG--YKKTG-----YLI-YFCHK--LSPTLG-E-CIYL--SRKN--DKN-----  
MtKun-14 MIVG--FKKTG-----YLI-FFCHKLLSPTPGV--CIYL--SRRN--DEN-----  
MtKun-20 KIET--LGS GSGA-----YKL-VYCPL-FSAPPG-A-CSDI--GRYR--DEN-----  
MtKun-24 KIET--LGS GSGA-----YKL-VYCPL-FSAPPG-A-CSDI--GRYR--DEN-----  
MtKun-15 -----TAPPG-----A-CYDI--GRH--DDF-----  
MtKun-16 KIVK--HGFG-----YKL-VFCPT-FTAPPG-L-CHDI--GRY--DDK-----  
MtKun-19 NIKK--SGSENA-----YKF-GFCVKETPS-----CWDI--GRYM-SIGEE-----  
MtKun-17 LIVK--HGSGHV-----YRL-GFCLDVTG-----D-CGYIGLQMFN--SEE-----  
MtKun-22 NIEK--HESGFG-----YRL-GYCVKDSP-----T-CLDI--GRAHEEVEDE-----  
MtKun-25 NIQK--HASGFG-----YNL-GFCVT-GSP-----T-CLDI--GRFD--NDE-----  
AtKun-3 QIQE--DGDA-----YKL-MYCPI-----SSIVACINV--SLEI--DDH-----  
BdKun-1 RIER--HGTD TTG-----YKL-MSCAKKGS-----CRYL--GLHV--FKGMNWL  
MtKun-1b KIEK--LEGDTGIPI-----YIF-KFCPS--VPGAL-CAPV--RTFT--DTD-----  
MtKun-1a KIER--LAGEHAYEI-----YSF-KFCPS--VPGVL-CAPV--GTFV--DTD-----  
MtKun-4 KIER--LEGEHAYEI-----YSF-LYCPS--VPGTL-CAPV--GTFV--DTD-----  
MtKun-2 RIVQ--TQTGGI-----YNI-QWCPT EACPSCKVQ--CGTV--GVIR--EN-----  
MtKun-3 RIVQ--TQTGGI-----YNI-QWCPT EACPSCKVQ--CGTV--GVIR--EN-----  
MtKun-26 RIVE--TPLEGM-----YNI-QWCPT EACPSCKFE--CGTV--DMLN--EN-----  
FvKun-3 RITRSQPEVDGNS-----YIL-RWCPTDVC PNCTFADCGNI--GSLV--ASR-----  
FvKun-4 RINKDADIDGV-----YSL-QWCPT ELCPTCRFI--CGDV--GALL--EN-----  
FvKun-5 KINKQADFDGI-----YYL-QWCPT EVCPIKFI--CGNV--GALV--EN-----  
MtKun-27 RIVK--AEFEV-----YNI-RFCPTD TCSFCRFD--CGFV--GGLR--EN-----  
MtKun-28 RILKISFGIEGVIGN-----YNI-RFCPSDTV-----N-CGTV--GNLR--EN-----  
BdKun-2 RVER--VERYGGVATDDEAREYKLM--MWC GDE-----AA-CQAL--GVFR--DGE-----  
OsKun-1 RVEK--YGGG-----YKL-VSCRD-----S-CQDL--GVSR--D-----  
SbKun-1 RVEK--HGRGG-----YKL-VWCGGAASGSTSSS--CQDL--GVFR--DDG-----  
ZmKun-1 RVEK--HSRG-----YKL-VWCGGSASTS--CQDL--GVFR--DDG-----  
AtKun-4 KIEK--SGEDA-----YKF-VFCPR--TCDSGNPK-CSDV--GIFI--DEL-----  
MtKun-5 KIER--FESG-----YKL-VFCPT-VCRECEVV-CKDI--GIFL--DEN-----  
MtKun-8 KIEK--YVEG-----YKL-VYCPI--VCP SCKHE-CKNV--GLFE--DEN-----  
MtKun-12 KIEK--YGDA-----YKL-VFCPS--VVQSFKHM-CKDV--GVFV--DEN-----  
MtKun-21 KIEK--YGDA-----YKL-VFCPS--VVQSFKHM-CKDV--GVFV--DEN-----  
MtKun-10 KIEK--YEDA-----YKL-VYCPN--VCP SCNHV-CKDI--GIYK--YKN-----  
MtKun-18 QIEK--YEDA-----YKL-VYCPN--VCP SCKHV-CKDI--GIYV--YKY-----  
MtKun-13 KIEK--ADKD-----YVL-SFCPAEAC-KCQTL-CREL--GLFV--DDK-----  
MtKun-23 KIEK--ADKD-----YVF-SFCPS--VC-KCQTL-CREL--GLYV--YDH-----  
AtKun-5 KIDK--FEKD-----YKI-RFCPT-VCNFCKVI-CRDV--GVFV--QD-----  
MtKun-6 KIEK--YEDD-----YKF-VFCPT-VCNFCKVM-CRNV--GIFR--DSN-----  
FvKun-1 KIEK--YDKD-----YKL-VFCPT-VCNFCKVI-CGDV--GIYL--EG-----  
FvKun-2 KIEK--YDDD-----YKL-VFCPK--VCRFCRVI-CGDV--GVHL--ES-----  
VvKun-1 KIEK--YGDD-----YKL-VFCPT-VCNFCKVI-CRDV--GVYI--QK-----  
VvKun-4 KIEK--YEDD-----YKL-VFCPT-VCDFCKPV-CGDI--GIYI--QN-----  
VvKun-2 KIEK--YEDD-----YKL-VFCPT-VCDFCKPV-CGDI--GIYI--QN-----

VvKun-3 KIEK--YEDD-----YKL-VFCPT-VCDFCKPV-CGDI--GIYI----QN-----  
 ;

AtKun-2 -----SAPQLIITKDTAK--TLLVKFKKVDATTATSNLVYFPG---  
 AtKun-1 -----GARRLALTSDE----ALLVKFQK-AATPKADLTKLRMFPF  
 MtKun-7 -----SDRRLMLRQ-----AIVVVFHDFRSL-----  
 MtKun-11 -----NGRLRLIM-SENFK--PFEVVFVD-VEDTAGFGRSVV-----  
 MtKun-9 -----GMRLVYEMDGD----ALAAVFNINDAARARRSSAI-----  
 MtKun-14 -----GMRLVYEMDGD----ALGAVFVN-VNDAARARRSSMRNVSA  
 MtKun-20 -----GWRLVPTEND----PFRVVFID-ATESEKAVV-----  
 MtKun-24 -----GWRLVPTEND----PFRVVFVD-ATESEKAVV-----  
 MtKun-15 -----TGRLLVLANNND----PYEVVFVD-AMGN-----  
 MtKun-16 -----NGRRLILTEDD----PYEVVFHVAIGTERSVV-----  
 MtKun-19 -----GGRRLSFNATE----DFEAVFA--AIAT-----  
 MtKun-17 -----GGSRLFLTAVD----AYSVVFVD-ANGNSALS I-----  
 MtKun-22 -----GGSRLHLTHQV----AFVVFVD-AASYEAGI IKSVA-----  
 MtKun-25 -----AGRRLNLTEHE----VYQVVFVD-AATYEA EY IKS V-----  
 AtKun-3 -----GVRRLVLTSDQ----SFVVKFQK-AYDSNSNCLKSNRSMF  
 BdKun-1 TSQSLAYRQCLQGWQIAVSAPMFWFFATP----PSTLNRK-PDDGGIYRGPAPAGFG  
 MtKun-1b -----GTKVMVAV-GDGNLPEYVRFQR-VSTFTPKNNMADQDSID  
 MtKun-1a -----GTKVMVAVGDGIE-----  
 MtKun-4 -----GTKVMALGAGIEE--PYVRFQK-ASTFTQKNQDFSGV--  
 MtKun-2 -----GKILLALDGG----ALPVPVQK-E-----  
 MtKun-3 -----GKILLALDGG----ALPVPVQK-E-----  
 MtKun-26 -----GKILLALDGG----PLPLVFQK-E-----  
 FvKun-3 -----GKRFLALNGS----ELPVPVFER-ARG-----  
 FvKun-4 -----GKRLLALDGS----ALPVPVFER-A-----  
 FvKun-5 -----DKRLLALDGS----VLPVPVFER-A-----  
 MtKun-27 -----GKILLALDGG----VLPVPVFCYTKNKRKLLQEPKNNLRS  
 MtKun-28 -----GKILLALDDRND----VLRVGFER-A-----  
 BdKun-2 -----G-GAWFLGAAAEQ--VHVVFQK-APSV-----  
 OsKun-1 -----GARAWLGASQP----PHVVFVK-ARPSPE-----  
 SbKun-1 -----DRRAWLGTETDR--AHAVKFEK-AATVHA-----  
 ZmKun-1 -----DRRAWLGTETDR--AHAVVFQK-DTMMHA-----  
 AtKun-4 -----GVRRLALSDK----PFLVMFKK-ANVTEVSSKTM-----  
 MtKun-5 -----RNTRFVL-SDF----PFGVKFQR-ACCE-----  
 MtKun-8 -----GNKRLAL-SDV---PYQVKFVK-V-----  
 MtKun-12 -----GNKRLAL-SDV---PLKVKFQK-A-----  
 MtKun-21 -----GNKRLAL-SDV---PLKVKFQK-A-----  
 MtKun-10 -----REMRLAL-TNV---PLKIKFQK-A-----  
 MtKun-18 -----REMRLAL-TNV---PFKVKFQK-A-----  
 MtKun-13 -----GNKHLALSDQIP---SFRVVFQR-A-----  
 MtKun-23 -----GKKHLALSDQVP---SFRVVFQR-A-----  
 AtKun-5 -----GKRRAL-SDV---PLKVMFKR-AY-----  
 MtKun-6 -----GNQRVAL-TDV---PYKVFQPSA-----  
 FvKun-1 -----GVRRLVL-SKV---PLKVMFKR-V-----  
 FvKun-2 -----GVRRLAL-SDVIV--PLKVMFKR-V-----  
 VvKun-1 -----GYRRALTTDA---PFRVMFKK-A-----  
 VvKun-4 -----GYRRAL-SDV---PFKVMFKK-A-----  
 VvKun-2 -----EYRRAL-SDV---PFKVMFKK-A-----  
 VvKun-3 -----GYRRAL-SDV---PFKVMFKK-A-----

AtKun-2 -----  
 AtKun-1 Y-----  
 MtKun-7 -----  
 MtKun-11 -----  
 MtKun-9 -----  
 MtKun-14 DTLTLQLLSQYREKEDITKHATDGLEVGIEDYAMIVQDRDIQVAGGDLWVIPGCTKAAD  
 MtKun-20 -----  
 MtKun-24 -----  
 MtKun-15 -----  
 MtKun-16 -----  
 MtKun-19 -----  
 MtKun-17 -----  
 MtKun-22 -----  
 MtKun-25 -----  
 AtKun-3 LFL-----  
 BdKun-1 -----  
 MtKun-1b PSKMIGGRAMTQSHRRERQSGHIPNRRGRGRVDGSGSSQEASQATQSEESQVVDPSQQM  
 MtKun-1a -----  
 MtKun-4 -----  
 MtKun-2 -----  
 MtKun-3 -----  
 MtKun-26 -----  
 FvKun-3 -----  
 FvKun-4 -----  
 FvKun-5 -----  
 MtKun-27 HKRKLNMFRPTLDDL-----  
 MtKun-28 -----  
 BdKun-2 -----  
 OsKun-1 -----  
 SbKun-1 -----



ZmKun-1 -----  
AtKun-4 -----  
MtKun-5 -----  
MtKun-8 -----  
MtKun-12 -----  
MtKun-21 -----  
MtKun-10 -----  
MtKun-18 -----  
MtKun-13 -----  
MtKun-23 -----  
AtKun-5 -----  
MtKun-6 -----  
FvKun-1 -----  
FvKun-2 -----  
VvKun-1 -----  
VvKun-4 -----  
VvKun-2 -----  
VvKun-3 -----

AtKun-2 -----  
AtKun-1 -----  
MtKun-7 -----  
MtKun-11 -----  
MtKun-9 -----  
MtKun-14 ANVCGIGGLIGVKYKGDKGNIFNVLSKEVRRSFFREEVGRIFFCGGLLSSTIDGASGGLLT  
MtKun-20 -----  
MtKun-24 -----  
MtKun-15 -----  
MtKun-16 -----  
MtKun-19 -----  
MtKun-17 -----  
MtKun-22 -----  
MtKun-25 -----  
AtKun-3 -----  
BdKun-1 -----  
MtKun-1b MMTLQQLPGGVTCGPFLSWRIDKPIFVALLCQSCGVATLVRKLRVVKPINHGES-----  
MtKun-1a -----  
MtKun-4 -----  
MtKun-2 -----  
MtKun-3 -----  
MtKun-26 -----  
FvKun-3 -----  
FvKun-4 -----  
FvKun-5 -----  
MtKun-27 -----  
MtKun-28 -----  
BdKun-2 -----  
OsKun-1 -----  
SbKun-1 -----  
ZmKun-1 -----  
AtKun-4 -----  
MtKun-5 -----  
MtKun-8 -----  
MtKun-12 -----  
MtKun-21 -----  
MtKun-10 -----  
MtKun-18 -----  
MtKun-13 -----  
MtKun-23 -----  
AtKun-5 -----  
MtKun-6 -----  
FvKun-1 -----  
FvKun-2 -----  
VvKun-1 -----  
VvKun-4 -----  
VvKun-2 -----  
VvKun-3 -----

AtKun-2 -----  
AtKun-1 -----  
MtKun-7 -----  
MtKun-11 -----  
MtKun-9 -----  
MtKun-14 VWDRSCVDVSSTSSFPVHLVIRGRVLKTNEKFVIDDVYPLCDTTAKQVLWDQLSHFDNNS  
MtKun-20 -----  
MtKun-24 -----  
MtKun-15 -----  
MtKun-16 -----  
MtKun-19 -----  
MtKun-17 -----  
MtKun-22 -----

MtKun-25 -----  
AtKun-3 -----  
BdKun-1 -----  
MtKun-1b -----  
MtKun-1a -----  
MtKun-4 -----  
MtKun-2 -----  
MtKun-3 -----  
MtKun-26 -----  
FvKun-3 -----  
FvKun-4 -----  
FvKun-5 -----  
MtKun-27 -----  
MtKun-28 -----  
BdKun-2 -----  
OsKun-1 -----  
SbKun-1 -----  
ZmKun-1 -----  
AtKun-4 -----  
MtKun-5 -----  
MtKun-8 -----  
MtKun-12 -----  
MtKun-21 -----  
MtKun-10 -----  
MtKun-18 -----  
MtKun-13 -----  
MtKun-23 -----  
AtKun-5 -----  
MtKun-6 -----  
FvKun-1 -----  
FvKun-2 -----  
VvKun-1 -----  
VvKun-4 -----  
VvKun-2 -----  
VvKun-3 -----

AtKun-2 -----  
AtKun-1 -----  
MtKun-7 -----  
MtKun-11 -----  
MtKun-9 -----  
MtKun-14 VANLCLCGDFNSVRS DGIKPQVHDYIEVVKR  
MtKun-20 -----  
MtKun-24 -----  
MtKun-15 -----  
MtKun-16 -----  
MtKun-19 -----  
MtKun-17 -----  
MtKun-22 -----  
MtKun-25 -----  
AtKun-3 -----  
BdKun-1 -----  
MtKun-1b -----  
MtKun-1a -----  
MtKun-4 -----  
MtKun-2 -----  
MtKun-3 -----  
MtKun-26 -----  
FvKun-3 -----  
FvKun-4 -----  
FvKun-5 -----  
MtKun-27 -----  
MtKun-28 -----  
BdKun-2 -----  
OsKun-1 -----  
SbKun-1 -----  
ZmKun-1 -----  
AtKun-4 -----  
MtKun-5 -----  
MtKun-8 -----  
MtKun-12 -----  
MtKun-21 -----  
MtKun-10 -----  
MtKun-18 -----  
MtKun-13 -----  
MtKun-23 -----  
AtKun-5 -----  
MtKun-6 -----  
FvKun-1 -----  
FvKun-2 -----  
VvKun-1 -----  
VvKun-4 -----

VvKun-2  
VvKun-3

-----  
-----

## C. I4 Serpin.

|          |                                                              |
|----------|--------------------------------------------------------------|
| CrSRP-1  | -----                                                        |
| VcSRP-1  | -----                                                        |
| SbSRP-11 | -----                                                        |
| OsSRP-14 | -----                                                        |
| SmSRP-1  | -----                                                        |
| PpSRP-1  | -----                                                        |
| PpSRP-2  | -----                                                        |
| PpSRP-3  | -----                                                        |
| PpSRP-4  | -----                                                        |
| SbSRP-8  | -----                                                        |
| SbSRP-4  | -----                                                        |
| OsSRP-7  | -----                                                        |
| MtSRP-8  | -----                                                        |
| SbSRP-7  | -----                                                        |
| OsSRP-3  | -----                                                        |
| AtSRP-4  | -----                                                        |
| AtSRP-7  | -----                                                        |
| AtSRP-1  | -----                                                        |
| AtSRP-6  | -----                                                        |
| FvSRP-12 | -----                                                        |
| FvSRP-7  | -----                                                        |
| FvSRP-11 | -----                                                        |
| FvSRP-2  | -----                                                        |
| FvSRP-1  | -----                                                        |
| FvSRP-10 | -----                                                        |
| FvSRP-9  | -----                                                        |
| FvSRP-14 | -----                                                        |
| FvSRP-6  | -----                                                        |
| FvSRP-4  | MTDAFLTLTYGVFGQTQSTAFGASSSPAFIGQSSAFGAFSTPVFGSSNQRSPPFGASGTS |
| FvSRP-13 | -----                                                        |
| FvSRP-5  | -----                                                        |
| FvSRP-8  | -----                                                        |
| AtSRP-2  | -----                                                        |
| AtSRP-3  | -----                                                        |
| AtSRP-8  | -----                                                        |
| SbSRP-16 | -----                                                        |
| OsSRP-6b | -----                                                        |
| OsSRP-5  | -----                                                        |
| OsSRP-6a | -----                                                        |
| SbSRP-2  | -----                                                        |
| SbSRP-3  | -----                                                        |
| AtSRP-5  | -----                                                        |
| FvSRP-3  | -----                                                        |
| MtSRP-11 | -----                                                        |
| MtSRP-9  | -----                                                        |
| MtSRP-6  | -----                                                        |
| MtSRP-16 | -----                                                        |
| MtSRP-3  | -----                                                        |
| MtSRP-4  | -----                                                        |
| MtSRP-10 | -----                                                        |
| MtSRP-12 | -----                                                        |
| MtSRP-1  | -----                                                        |
| MtSRP-13 | -----                                                        |
| MtSRP-14 | -----                                                        |
| MtSRP-5  | -----                                                        |
| MtSRP-2  | -----                                                        |
| MtSRP-7  | -----                                                        |
| MtSRP-15 | -----                                                        |
| SbSRP-12 | -----                                                        |
| SbSRP-1  | -----                                                        |
| SbSRP-9  | -----                                                        |
| OsSRP-10 | -----                                                        |
| OsSRP-8  | -----                                                        |
| OsSRP-12 | -----                                                        |
| SbSRP-15 | -----                                                        |
| OsSRP-9  | -----                                                        |
| OsSRP-11 | -----                                                        |
| OsSRP-15 | -----                                                        |
| SbSRP-10 | -----                                                        |
| OsSRP-13 | -----                                                        |
| SbSRP-13 | -----                                                        |
| SbSRP-14 | -----                                                        |
| OsSRP-1  | -----                                                        |
| OsSRP-2  | -----                                                        |
| SbSRP-5  | -----                                                        |
| SbSRP-6  | -----                                                        |
| OsSRP-4  | -----                                                        |
| CrSRP-1  | -----                                                        |

VcSRP-1 -----  
SbSRP-11 -----  
OsSRP-14 -----  
SmSRP-1 -----  
PpSRP-1 -----  
PpSRP-2 -----  
PpSRP-3 -----  
PpSRP-4 -----  
SbSRP-8 -----  
SbSRP-4 -----  
OsSRP-7 -----  
MtSRP-8 -----  
SbSRP-7 -----  
OsSRP-3 -----  
AtSRP-4 -----  
AtSRP-7 -----  
AtSRP-1 -----  
AtSRP-6 -----  
FvSRP-12 -----  
FvSRP-7 -----  
FvSRP-11 -----  
FvSRP-2 -----  
FvSRP-1 -----  
FvSRP-10 -----  
FvSRP-9 -----  
FvSRP-14 -----  
FvSRP-6 -----  
FvSRP-4 VLGQKPAFGAFGLSPAQTSLFGSTAQPSQPAFRSNMFGNTSSPFGGSQPAFGTNTTPAFG  
FvSRP-13 -----  
FvSRP-5 -----  
FvSRP-8 -----  
AtSRP-2 -----  
AtSRP-3 -----  
AtSRP-8 -----  
SbSRP-16 -----  
OsSRP-6b -----  
OsSRP-5 -----  
OsSRP-6a -----  
SbSRP-2 -----  
SbSRP-3 -----  
AtSRP-5 -----  
FvSRP-3 -----  
MtSRP-11 -----  
MtSRP-9 -----  
MtSRP-6 -----  
MtSRP-16 -----  
MtSRP-3 -----  
MtSRP-4 -----  
MtSRP-10 -----  
MtSRP-12 -----  
MtSRP-1 -----  
MtSRP-13 -----  
MtSRP-14 -----  
MtSRP-5 -----  
MtSRP-2 -----  
MtSRP-7 -----  
MtSRP-15 -----  
SbSRP-12 -----  
SbSRP-1 -----  
SbSRP-9 -----  
OsSRP-10 -----  
OsSRP-8 -----  
OsSRP-12 -----  
SbSRP-15 -----  
OsSRP-9 -----  
OsSRP-11 -----  
OsSRP-15 -----  
SbSRP-10 -----  
OsSRP-13 -----  
SbSRP-13 -----  
SbSRP-14 -----  
OsSRP-1 -----  
OsSRP-2 -----  
SbSRP-5 -----  
SbSRP-6 -----  
OsSRP-4 -----  
  
CrSRP-1 -----  
VcSRP-1 -----  
SbSRP-11 -----  
OsSRP-14 -----  
SmSRP-1 -----

|          |                                                                 |
|----------|-----------------------------------------------------------------|
| PpSRP-1  | -----                                                           |
| PpSRP-2  | -----                                                           |
| PpSRP-3  | -----                                                           |
| PpSRP-4  | -----                                                           |
| SbSRP-8  | -----                                                           |
| SbSRP-4  | -----                                                           |
| OsSRP-7  | -----                                                           |
| MtSRP-8  | -----                                                           |
| SbSRP-7  | -----                                                           |
| OsSRP-3  | -----                                                           |
| AtSRP-4  | -----                                                           |
| AtSRP-7  | -----                                                           |
| AtSRP-1  | -----                                                           |
| AtSRP-6  | -----                                                           |
| FvSRP-12 | -----                                                           |
| FvSRP-7  | -----                                                           |
| FvSRP-11 | -----                                                           |
| FvSRP-2  | -----                                                           |
| FvSRP-1  | -----                                                           |
| FvSRP-10 | -----                                                           |
| FvSRP-9  | -----                                                           |
| FvSRP-14 | -----                                                           |
| FvSRP-6  | -----                                                           |
| FvSRP-4  | STNTTAFGSTNTNPAFGTTTTNPAFGGQATPAFGATSASPFGGTGTTPAFGAPSTPTFGSTPS |
| FvSRP-13 | -----                                                           |
| FvSRP-5  | -----                                                           |
| FvSRP-8  | -----                                                           |
| AtSRP-2  | -----                                                           |
| AtSRP-3  | -----                                                           |
| AtSRP-8  | -----                                                           |
| SbSRP-16 | -----                                                           |
| OsSRP-6b | -----                                                           |
| OsSRP-5  | -----                                                           |
| OsSRP-6a | -----                                                           |
| SbSRP-2  | -----                                                           |
| SbSRP-3  | -----                                                           |
| AtSRP-5  | -----                                                           |
| FvSRP-3  | -----                                                           |
| MtSRP-11 | -----                                                           |
| MtSRP-9  | -----                                                           |
| MtSRP-6  | -----                                                           |
| MtSRP-16 | -----                                                           |
| MtSRP-3  | -----                                                           |
| MtSRP-4  | -----                                                           |
| MtSRP-10 | -----                                                           |
| MtSRP-12 | -----                                                           |
| MtSRP-1  | -----                                                           |
| MtSRP-13 | -----                                                           |
| MtSRP-14 | -----                                                           |
| MtSRP-5  | -----                                                           |
| MtSRP-2  | -----                                                           |
| MtSRP-7  | -----                                                           |
| MtSRP-15 | -----                                                           |
| SbSRP-12 | -----                                                           |
| SbSRP-1  | -----                                                           |
| SbSRP-9  | -----                                                           |
| OsSRP-10 | -----                                                           |
| OsSRP-8  | -----                                                           |
| OsSRP-12 | -----                                                           |
| SbSRP-15 | -----                                                           |
| OsSRP-9  | -----                                                           |
| OsSRP-11 | -----                                                           |
| OsSRP-15 | -----                                                           |
| SbSRP-10 | -----                                                           |
| OsSRP-13 | -----                                                           |
| SbSRP-13 | -----                                                           |
| SbSRP-14 | -----                                                           |
| OsSRP-1  | -----                                                           |
| OsSRP-2  | -----                                                           |
| SbSRP-5  | -----                                                           |
| SbSRP-6  | -----                                                           |
| OsSRP-4  | -----                                                           |
|          |                                                                 |
| CrSRP-1  | -----                                                           |
| VcSRP-1  | -----                                                           |
| SbSRP-11 | -----                                                           |
| OsSRP-14 | -----                                                           |
| SmSRP-1  | -----                                                           |
| PpSRP-1  | -----                                                           |
| PpSRP-2  | -----                                                           |
| PpSRP-3  | -----                                                           |
| PpSRP-4  | -----                                                           |

|          |                                                              |
|----------|--------------------------------------------------------------|
| SbSRP-8  | -----                                                        |
| SbSRP-4  | -----                                                        |
| OsSRP-7  | -----                                                        |
| MtSRP-8  | -----                                                        |
| SbSRP-7  | -----                                                        |
| OsSRP-3  | -----                                                        |
| AtSRP-4  | -----                                                        |
| AtSRP-7  | -----                                                        |
| AtSRP-1  | -----                                                        |
| AtSRP-6  | -----                                                        |
| FvSRP-12 | -----                                                        |
| FvSRP-7  | -----                                                        |
| FvSRP-11 | -----                                                        |
| FvSRP-2  | -----                                                        |
| FvSRP-1  | -----                                                        |
| FvSRP-10 | -----                                                        |
| FvSRP-9  | -----                                                        |
| FvSRP-14 | -----                                                        |
| FvSRP-6  | -----                                                        |
| FvSRP-4  | PAFGSTGSAFGTTSSSLFGTGGAFGATPSTPSFGQSSSAFGTTTSAPAFGQSSTGFGFSS |
| FvSRP-13 | -----                                                        |
| FvSRP-5  | -----                                                        |
| FvSRP-8  | -----                                                        |
| AtSRP-2  | -----                                                        |
| AtSRP-3  | -----                                                        |
| AtSRP-8  | -----                                                        |
| SbSRP-16 | -----                                                        |
| OsSRP-6b | -----                                                        |
| OsSRP-5  | -----                                                        |
| OsSRP-6a | -----                                                        |
| SbSRP-2  | -----                                                        |
| SbSRP-3  | -----                                                        |
| AtSRP-5  | -----                                                        |
| FvSRP-3  | -----                                                        |
| MtSRP-11 | -----                                                        |
| MtSRP-9  | -----                                                        |
| MtSRP-6  | -----                                                        |
| MtSRP-16 | -----                                                        |
| MtSRP-3  | -----                                                        |
| MtSRP-4  | -----                                                        |
| MtSRP-10 | -----                                                        |
| MtSRP-12 | -----                                                        |
| MtSRP-1  | -----                                                        |
| MtSRP-13 | -----                                                        |
| MtSRP-14 | -----                                                        |
| MtSRP-5  | -----                                                        |
| MtSRP-2  | -----                                                        |
| MtSRP-7  | -----                                                        |
| MtSRP-15 | -----                                                        |
| SbSRP-12 | -----                                                        |
| SbSRP-1  | -----                                                        |
| SbSRP-9  | -----                                                        |
| OsSRP-10 | -----                                                        |
| OsSRP-8  | -----                                                        |
| OsSRP-12 | -----                                                        |
| SbSRP-15 | -----                                                        |
| OsSRP-9  | -----                                                        |
| OsSRP-11 | -----                                                        |
| OsSRP-15 | -----                                                        |
| SbSRP-10 | -----                                                        |
| OsSRP-13 | -----                                                        |
| SbSRP-13 | -----                                                        |
| SbSRP-14 | -----                                                        |
| OsSRP-1  | -----                                                        |
| OsSRP-2  | -----                                                        |
| SbSRP-5  | -----                                                        |
| SbSRP-6  | -----                                                        |
| OsSRP-4  | -----                                                        |
|          |                                                              |
| CrSRP-1  | -----                                                        |
| VcSRP-1  | -----                                                        |
| SbSRP-11 | -----                                                        |
| OsSRP-14 | -----                                                        |
| SmSRP-1  | -----                                                        |
| PpSRP-1  | -----                                                        |
| PpSRP-2  | -----                                                        |
| PpSRP-3  | -----                                                        |
| PpSRP-4  | -----                                                        |
| SbSRP-8  | -----                                                        |
| SbSRP-4  | -----                                                        |
| OsSRP-7  | -----                                                        |
| MtSRP-8  | -----                                                        |

SbSRP-7 -----  
OsSRP-3 -----  
AtSRP-4 -----  
AtSRP-7 -----  
AtSRP-1 -----  
AtSRP-6 -----  
FvSRP-12 -----  
FvSRP-7 -----  
FvSRP-11 -----  
FvSRP-2 -----  
FvSRP-1 -----  
FvSRP-10 -----  
FvSRP-9 -----  
FvSRP-14 -----  
FvSRP-6 -----  
FvSRP-4 STPAFGQSSSTFGSTQFGASSPFGGQSSSFGVQSTTPTLGNNAFGQSTFGAQQGGSRATP  
FvSRP-13 -----  
FvSRP-5 -----  
FvSRP-8 -----  
AtSRP-2 -----  
AtSRP-3 -----  
AtSRP-8 -----  
SbSRP-16 -----  
OsSRP-6b -----  
OsSRP-5 -----  
OsSRP-6a -----  
SbSRP-2 -----  
SbSRP-3 -----  
AtSRP-5 -----  
FvSRP-3 -----  
MtSRP-11 -----  
MtSRP-9 -----  
MtSRP-6 -----  
MtSRP-16 -----  
MtSRP-3 -----  
MtSRP-4 -----  
MtSRP-10 -----  
MtSRP-12 -----  
MtSRP-1 -----  
MtSRP-13 -----  
MtSRP-14 -----  
MtSRP-5 -----  
MtSRP-2 -----  
MtSRP-7 -----  
MtSRP-15 -----  
SbSRP-12 -----  
SbSRP-1 -----  
SbSRP-9 -----  
OsSRP-10 -----  
OsSRP-8 -----  
OsSRP-12 -----  
SbSRP-15 -----  
OsSRP-9 -----  
OsSRP-11 -----  
OsSRP-15 -----  
SbSRP-10 -----  
OsSRP-13 -----  
SbSRP-13 -----  
SbSRP-14 -----  
OsSRP-1 -----  
OsSRP-2 -----  
SbSRP-5 -----  
SbSRP-6 -----  
OsSRP-4 -----

CrSRP-1 -----  
VcSRP-1 -----  
SbSRP-11 -----  
OsSRP-14 -----  
SmSRP-1 -----  
PpSRP-1 -----  
PpSRP-2 -----  
PpSRP-3 -----  
PpSRP-4 -----  
SbSRP-8 -----  
SbSRP-4 -----  
OsSRP-7 -----  
MtSRP-8 -----  
SbSRP-7 -----  
OsSRP-3 -----  
AtSRP-4 -----  
AtSRP-7 -----



AtSRP-1 -----  
AtSRP-6 -----  
FvSRP-12 -----  
FvSRP-7 -----  
FvSRP-11 -----  
FvSRP-2 -----  
FvSRP-1 -----  
FvSRP-10 -----  
FvSRP-9 -----  
FvSRP-14 -----  
FvSRP-6 -----  
FvSRP-4 YTGTSSEPDNGLGKLESI SAMPAYKEKSHEELRWEDYQLGDKAGPSPAGGGGFGMSTVQT  
FvSRP-13 -----  
FvSRP-5 -----  
FvSRP-8 -----  
AtSRP-2 -----  
AtSRP-3 -----  
AtSRP-8 -----  
SbSRP-16 -----  
OsSRP-6b -----  
OsSRP-5 -----  
OsSRP-6a -----  
SbSRP-2 -----  
SbSRP-3 -----  
AtSRP-5 -----  
FvSRP-3 -----  
MtSRP-11 -----  
MtSRP-9 -----  
MtSRP-6 -----  
MtSRP-16 -----  
MtSRP-3 -----  
MtSRP-4 -----  
MtSRP-10 -----  
MtSRP-12 -----  
MtSRP-1 -----  
MtSRP-13 -----  
MtSRP-14 -----  
MtSRP-5 -----  
MtSRP-2 -----  
MtSRP-7 -----  
MtSRP-15 -----  
SbSRP-12 -----  
SbSRP-1 -----  
SbSRP-9 -----  
OsSRP-10 -----  
OsSRP-8 -----  
OsSRP-12 -----  
SbSRP-15 -----  
OsSRP-9 -----  
OsSRP-11 -----  
OsSRP-15 -----  
SbSRP-10 -----  
OsSRP-13 -----  
SbSRP-13 -----  
SbSRP-14 -----  
OsSRP-1 -----  
OsSRP-2 -----  
SbSRP-5 -----  
SbSRP-6 -----  
OsSRP-4 -----

CrSRP-1 -----  
VcSRP-1 -----  
SbSRP-11 -----  
OsSRP-14 -----  
SmSRP-1 -----  
PpSRP-1 -----  
PpSRP-2 -----  
PpSRP-3 -----  
PpSRP-4 -----  
SbSRP-8 -----  
SbSRP-4 -----  
OsSRP-7 -----  
MtSRP-8 -----  
SbSRP-7 -----  
OsSRP-3 -----  
AtSRP-4 -----  
AtSRP-7 -----  
AtSRP-1 -----  
AtSRP-6 -----  
FvSRP-12 -----  
FvSRP-7 -----

FvSRP-11 -----  
FvSRP-2 -----  
FvSRP-1 -----  
FvSRP-10 -----  
FvSRP-9 -----  
FvSRP-14 -----  
FvSRP-6 -----  
FvSRP-4 NPLNPIHATPFAQTCSPPFNHSTSSSLFAPKTSSFPSAGFGVTSSSPFSSSPFSSSPF  
FvSRP-13 -----  
FvSRP-5 -----  
FvSRP-8 -----  
AtSRP-2 -----  
AtSRP-3 -----  
AtSRP-8 -----  
SbSRP-16 -----  
OsSRP-6b -----  
OsSRP-5 -----  
OsSRP-6a -----  
SbSRP-2 -----  
SbSRP-3 -----  
AtSRP-5 -----  
FvSRP-3 -----  
MtSRP-11 -----  
MtSRP-9 -----  
MtSRP-6 -----  
MtSRP-16 -----  
MtSRP-3 -----  
MtSRP-4 -----  
MtSRP-10 -----  
MtSRP-12 -----  
MtSRP-1 -----  
MtSRP-13 -----  
MtSRP-14 -----  
MtSRP-5 -----  
MtSRP-2 -----  
MtSRP-7 -----  
MtSRP-15 -----  
SbSRP-12 -----  
SbSRP-1 -----  
SbSRP-9 -----  
OsSRP-10 -----  
OsSRP-8 -----  
OsSRP-12 -----  
SbSRP-15 -----  
OsSRP-9 -----  
OsSRP-11 -----  
OsSRP-15 -----  
SbSRP-10 -----  
OsSRP-13 -----  
SbSRP-13 -----  
SbSRP-14 -----  
OsSRP-1 -----  
OsSRP-2 -----  
SbSRP-5 -----  
SbSRP-6 -----  
OsSRP-4 -----

CrSRP-1 -----  
VcSRP-1 -----  
SbSRP-11 -----  
OsSRP-14 -----  
SmSRP-1 -----  
PpSRP-1 -----  
PpSRP-2 -----  
PpSRP-3 -----  
PpSRP-4 -----  
SbSRP-8 -----  
SbSRP-4 -----  
OsSRP-7 -----  
MtSRP-8 -----  
SbSRP-7 -----  
OsSRP-3 -----  
AtSRP-4 -----  
AtSRP-7 -----  
AtSRP-1 -----  
AtSRP-6 -----  
FvSRP-12 -----  
FvSRP-7 -----  
FvSRP-11 -----  
FvSRP-2 -----  
FvSRP-1 -----  
FvSRP-10 -----

FvSRP-9 -----  
FvSRP-14 -----  
FvSRP-6 -----  
FvSRP-4 SSSWPFSSSTQGNLFTPASSAPAFGSAPAFGQTSSPLPFSSPSSFSFSTAATSSTPSFNF  
FvSRP-13 -----  
FvSRP-5 -----  
FvSRP-8 -----  
AtSRP-2 -----  
AtSRP-3 -----  
AtSRP-8 -----  
SbSRP-16 -----  
OsSRP-6b -----  
OsSRP-5 -----  
OsSRP-6a -----  
SbSRP-2 -----  
SbSRP-3 -----  
AtSRP-5 -----  
FvSRP-3 -----  
MtSRP-11 -----  
MtSRP-9 -----  
MtSRP-6 -----  
MtSRP-16 -----  
MtSRP-3 -----  
MtSRP-4 -----  
MtSRP-10 -----  
MtSRP-12 -----  
MtSRP-1 -----  
MtSRP-13 -----  
MtSRP-14 -----  
MtSRP-5 -----  
MtSRP-2 -----  
MtSRP-7 -----  
MtSRP-15 -----  
SbSRP-12 -----  
SbSRP-1 -----  
SbSRP-9 -----  
OsSRP-10 -----  
OsSRP-8 -----  
OsSRP-12 -----  
SbSRP-15 -----  
OsSRP-9 -----  
OsSRP-11 -----  
OsSRP-15 -----  
SbSRP-10 -----  
OsSRP-13 -----  
SbSRP-13 -----  
SbSRP-14 -----  
OsSRP-1 -----  
OsSRP-2 -----  
SbSRP-5 -----  
SbSRP-6 -----  
OsSRP-4 -----

CrSRP-1 -----  
VcSRP-1 -----  
SbSRP-11 -----  
OsSRP-14 -----  
SmSRP-1 -----  
PpSRP-1 -----  
PpSRP-2 -----  
PpSRP-3 -----  
PpSRP-4 -----  
SbSRP-8 -----  
SbSRP-4 -----  
OsSRP-7 -----  
MtSRP-8 -----  
SbSRP-7 -----  
OsSRP-3 -----  
AtSRP-4 -----  
AtSRP-7 -----  
AtSRP-1 -----  
AtSRP-6 -----  
FvSRP-12 -----  
FvSRP-7 -----  
FvSRP-11 -----  
FvSRP-2 -----  
FvSRP-1 -----  
FvSRP-10 -----  
FvSRP-9 -----  
FvSRP-14 -----  
FvSRP-6 -----  
FvSRP-4 PTPSNPQTQSAQTGTISFQLNPSTFRSNLFNNTSSLQSSSLGTTSNQLGNNPPAETDSST

FvSRP-13 -----  
FvSRP-5 -----  
FvSRP-8 -----  
AtSRP-2 -----  
AtSRP-3 -----  
AtSRP-8 -----  
SbSRP-16 -----  
OsSRP-6b -----  
OsSRP-5 -----  
OsSRP-6a -----  
SbSRP-2 -----  
SbSRP-3 -----  
AtSRP-5 -----  
FvSRP-3 -----  
MtSRP-11 -----  
MtSRP-9 -----  
MtSRP-6 -----  
MtSRP-16 -----  
MtSRP-3 -----  
MtSRP-4 -----  
MtSRP-10 -----  
MtSRP-12 -----  
MtSRP-1 -----  
MtSRP-13 -----  
MtSRP-14 -----  
MtSRP-5 -----  
MtSRP-2 -----  
MtSRP-7 -----  
MtSRP-15 -----  
SbSRP-12 -----  
SbSRP-1 -----  
SbSRP-9 -----  
OsSRP-10 -----  
OsSRP-8 -----  
OsSRP-12 -----  
SbSRP-15 -----  
OsSRP-9 -----  
OsSRP-11 -----  
OsSRP-15 -----  
SbSRP-10 -----  
OsSRP-13 -----  
SbSRP-13 -----  
SbSRP-14 -----  
OsSRP-1 -----  
OsSRP-2 -----  
SbSRP-5 -----  
SbSRP-6 -----  
OsSRP-4 -----

CrSRP-1 -----  
VcSRP-1 -----MRL  
SbSRP-11 -----  
OsSRP-14 -----  
SmSRP-1 -----  
PpSRP-1 -----  
PpSRP-2 -----MNNLSGLGVVALCGAVCAFVVTL  
PpSRP-3 -----  
PpSRP-4 -----  
SbSRP-8 -----  
SbSRP-4 -----  
OsSRP-7 -----  
MtSRP-8 -----  
SbSRP-7 -----  
OsSRP-3 -----  
AtSRP-4 -----  
AtSRP-7 -----  
AtSRP-1 -----  
AtSRP-6 -----MEPKEKKQ  
FvSRP-12 -----  
FvSRP-7 -----  
FvSRP-11 -----  
FvSRP-2 -----  
FvSRP-1 -----  
FvSRP-10 -----  
FvSRP-9 -----  
FvSRP-14 -----  
FvSRP-6 -----MDNKDDGRRISYTPEQCTPYNPSSPVYTPSSSAYTPSSPGYTPTTPGSP  
FvSRP-4 TITINEPSLSNNGSSQPFGYTSSTLTGITINSSSGSRITITPASSTTITITPTSGSTT  
FvSRP-13 -----  
FvSRP-5 -----  
FvSRP-8 -----  
AtSRP-2 -----

AtSRP-3 -----  
 AtSRP-8 -----  
 SbSRP-16 -----  
 OsSRP-6b -----  
 OsSRP-5 -----  
 OsSRP-6a -----  
 SbSRP-2 -----  
 SbSRP-3 -----MGPALTPVAFMEAEKAFFAWS  
 AtSRP-5 -----  
 FvSRP-3 -----  
 MtSRP-11 -----  
 MtSRP-9 -----  
 MtSRP-6 -----  
 MtSRP-16 -----  
 MtSRP-3 -----  
 MtSRP-4 -----  
 MtSRP-10 -----  
 MtSRP-12 -----  
 MtSRP-1 -----  
 MtSRP-13 -----  
 MtSRP-14 -----  
 MtSRP-5 -----  
 MtSRP-2 -----  
 MtSRP-7 -----  
 MtSRP-15 -----  
 SbSRP-12 -----  
 SbSRP-1 -----  
 SbSRP-9 -----  
 OsSRP-10 -----  
 OsSRP-8 -----MGSPPPRRRCCAIQGFVVLFLVYV  
 OsSRP-12 -----MATPPAAGAPRRRWCAIQGLVVLFLVYV  
 SbSRP-15 -----MAR  
 OsSRP-9 -----  
 OsSRP-11 -----  
 OsSRP-15 -----  
 SbSRP-10 -----  
 OsSRP-13 -----  
 SbSRP-13 -----  
 SbSRP-14 -----  
 OsSRP-1 -----  
 OsSRP-2 -----  
 SbSRP-5 -----MSSCHPTGSRNTSSSWRQDDHAAPTHDGTD  
 SbSRP-6 -----MSTPRRGQHHGDERAGTRAGAASRDNGGQAGDLSFGSTAGPWIAFDP  
 OsSRP-4 -----

CrSRP-1 -----MPPVK-  
 VcSRP-1 FTHKPKVTVTVKQRPVPTTCYPTAVG-----STIFH--RQLR-  
 SbSRP-11 -----MQAASLRRALHPRRPGAAQLFPFVPGTRPGAFSASAAAAHSPKDAR-  
 OsSRP-14 -----MQV-----SSYLR--RALR-  
 SmSRP-1 -----  
 PpSRP-1 -----MDVG-  
 PpSRP-2 QMGYPNEGFSVRKKILSWFRLGKPK-----STLSK--MDVA-  
 PpSRP-3 -----MG--LDVE-  
 PpSRP-4 -----MG--LDVA-  
 SbSRP-8 -----MTGQA--VAAA-  
 SbSRP-4 -----  
 OsSRP-7 -----  
 MtSRP-8 -----MKRKYDESS-----SFSSS--YFFS-  
 SbSRP-7 -----MQLA-  
 OsSRP-3 -----MELA-  
 AtSRP-4 -----MDLE-  
 AtSRP-7 -----MDVR-  
 AtSRP-1 --MDSKRKNQELSTSETADPSLSKT-----NKKQK--IDMQ-  
 AtSRP-6 KLDTSEVASPSLSKTHLKKKTKKQKIRKSQEITSPSLSKNTDLVIASPSLSN--IDVG-  
 FvSRP-12 -----  
 FvSRP-7 -----  
 FvSRP-11 -----MDTK-  
 FvSRP-2 -----  
 FvSRP-1 -----MDDLK-----ALQDL--EALQ-  
 FvSRP-10 -----MD-----YKYL--EAFQ-  
 FvSRP-9 -----MAYF--KHLK-  
 FvSRP-14 -----MADL--QHLK-  
 FvSRP-6 EYNPSFPQYTPYSPYSTVYTPSSSAYSPTSPGSPEYHPSSPYTPYPPPYTPY--STAYI  
 FvSRP-4 VTIAPSSGTTSTSTSGHTPPFASPFVVSQASQPSQTSTSIYFYTINSFDQIQPNRDGFGS  
 FvSRP-13 -----MAPRPPI-----SFKAS--ESLR-  
 FvSRP-5 -----MAARFPYQPRP-----SFKAS--ESLR-  
 FvSRP-8 -----MENKRLKNCETQKCLKAIRETNSRKHGCTIRSIPILISTTTFI--QSIR-  
 AtSRP-2 -----MELG-  
 AtSRP-3 -----MELG-  
 AtSRP-8 -----MELG-  
 SbSRP-16 -----MAGT-  
 OsSRP-6b -----

OsSRP-5 -----MDATATDLR-  
 OsSRP-6a -----MAADLR-  
 SbSRP-2 -----MATADIR-  
 SbSRP-3 LLLSSPAKYPENTLQDLEIATPPGQRSAPRFFLVESQGSLSDQVDLPTPTMAT--ADIR-  
 AtSRP-5 -----MDVR-  
 FvSRP-3 -----MDLS-  
 MtSRP-11 ---MGIDNNILTLDSLCLLKSDS-----IRRIM--NILS-  
 MtSRP-9 -----M--SYHR-  
 MtSRP-6 -----MMQNLIR-  
 MtSRP-16 -----MLPQKRRTSEQ-----NLIG-  
 MtSRP-3 -----  
 MtSRP-4 -----MNLQ-  
 MtSRP-10 -----MADRES-----KSKQK--RMIL-  
 MtSRP-12 -----MAHCESKPEEK-----RMIL-  
 MtSRP-1 -----  
 MtSRP-13 -----  
 MtSRP-14 -----MALH-  
 MtSRP-5 -----MFRSRKTIAIAKVVLCCFFVLDLFLRSESALA-  
 MtSRP-2 -----MIPNTQSDIQ-----  
 MtSRP-7 -----MDLR-  
 MtSRP-15 -----MDHR-  
 SbSRP-12 -----MA-----AADAA--IAAR-  
 SbSRP-1 -----MQFPTTITSPWS-----MEADT--QRVS-  
 SbSRP-9 -----MTRKRRRSG-----KTVPK--KSNA-  
 OsSRP-10 -----MES--CARR-  
 OsSRP-8 LAVLVLAGGELFRDDHPLDLRFPSS-----PGIGS--SSSSS  
 OsSRP-12 LAVLVLAGGELFHDDQLQPRFPSSPGIGSSSSSSSARILLSPRSMIRRLGEIARRSGSR-  
 SbSRP-15 EAGWSRAPRPATRTLMEQRRHGQPP-----VSSCR--PHRR-  
 OsSRP-9 -----M--EDNA-  
 OsSRP-11 -----M--EDDA-  
 OsSRP-15 -----MDDGEAARRHRH-----RAIS-  
 SbSRP-10 -----MA-----SGKGE--KATS-  
 OsSRP-13 -----  
 SbSRP-13 -----  
 SbSRP-14 -----  
 OsSRP-1 -----  
 OsSRP-2 -----  
 SbSRP-5 DGHSPQFFPAPSVTAAIARYLASQP-----TQHIS--QQPSP  
 SbSRP-6 PHPWAPPEHARAPVFAQQAPVDFPF-----WSTPT--SFANP  
 OsSRP-4 -----MAALAAGEPFSGRATGGD-----GGVR-

CrSRP-1 -----  
 VcSRP-1 -----TMM-----  
 SbSRP-11 -----NAPPPIMPTRPWGEALA-----  
 OsSRP-14 -----RPPFPAGDANHRRLSSAPAPKPEAPAEAMPPPPMPTRPWGEALA-----  
 SmSRP-1 -----MI-----  
 PpSRP-1 -----ALA-----  
 PpSRP-2 -----ASV-----  
 PpSRP-3 -----AMV-----  
 PpSRP-4 -----SMV-----  
 SbSRP-8 -----AAV-----  
 SbSRP-4 -----  
 OsSRP-7 -----  
 MtSRP-8 -----SAV-----  
 SbSRP-7 -----EAA-----  
 OsSRP-3 -----EAV-----  
 AtSRP-4 -----ESI-----  
 AtSRP-7 -----EAM-----  
 AtSRP-1 -----EAM-----  
 AtSRP-6 -----EAM-----  
 FvSRP-12 -----  
 FvSRP-7 -----  
 FvSRP-11 -----DAI-----  
 FvSRP-2 -----  
 FvSRP-1 -----TPI-----  
 FvSRP-10 -----TPI-----  
 FvSRP-9 -----EPI-----  
 FvSRP-14 -----EPI-----  
 FvSRP-6 PQVYHPTQQNGVPSYIYSPSLYSPSRYTAAGHTIMNSTHPPPSFKPSKELRESI-----  
 FvSRP-4 SFERLQNNSGRWLGSACPATNPNFLLHRPGQLPSGHAAPSPSVQNGISGSLTAMRDLES-  
 FvSRP-13 -----KSI-----  
 FvSRP-5 -----KSI-----  
 FvSRP-8 -----VSKKIHSKSI-----  
 AtSRP-2 -----KSI-----  
 AtSRP-3 -----KSI-----  
 AtSRP-8 -----KSM-----  
 SbSRP-16 -----LLSI-----  
 OsSRP-6b -----  
 OsSRP-5 -----VSI-----  
 OsSRP-6a -----VSI-----  
 SbSRP-2 -----RSI-----  
 SbSRP-3 -----VSI-----

AtSRP-5 -----ESI-----  
FvSRP-3 -----ASI-----  
MtSRP-11 -----KSI-----  
MtSRP-9 -----ESI-----  
MtSRP-6 -----KSL-----  
MtSRP-16 -----KSL-----  
MtSRP-3 -----ML-----  
MtSRP-4 -----SESI-----  
MtSRP-10 -----ETI-----  
MtSRP-12 -----ESI-----  
MtSRP-1 -----ESI-----  
MtSRP-13 -----ESI-----  
MtSRP-14 -----ESI-----  
MtSRP-5 -----ESI-----  
MtSRP-2 -----IDPTQHQQLLDFLRSEALAN-----  
MtSRP-7 -----ESI-----  
MtSRP-15 -----ESI-----  
SbSRP-12 -----AAS-----  
SbSRP-1 -----AAS-----  
SbSRP-9 -----CAV-----  
OsSRP-10 -----CAV-----  
OsSRP-8 ARFLLSPRSLLLRLGEIASRRGRWWRPESDSPTS GGRKDGNSSTTEACSRRCAA-----  
OsSRP-12 -----RWWTGGVVRPESGSPRSEGGNSSATDQACSRRCAA-----  
SbSRP-15 -----GGGGGQARPSKRARGTAA-----  
OsSRP-9 -----GDC-----  
OsSRP-11 -----GNC-----  
OsSRP-15 -----VCQ-----  
SbSRP-10 -----VCQ-----  
OsSRP-13 -----VCQ-----  
SbSRP-13 -----VCQ-----  
SbSRP-14 -----VCQ-----  
OsSRP-1 -----VCQ-----  
OsSRP-2 -----VCQ-----  
SbSRP-5 PRWHKHNYTPLQQWPPHRAAPAGPWQWASSTFAPPNVTVVVPAGETPAPGGACVAG----  
SbSRP-6 FHPSTLNVWPWPGEVFPFAGFPAAGPAAPEPEWRHRRQDVFAGIGRRSVPVAVTDPDLD  
OsSRP-4 -----SDVMAPPAM-----

CrSRP-1 -APVADAPASPALSALSASYALFLEAAAGTGGK-----GCFLSPMSIIYALTLALN--  
VcSRP-1 -ASCKSMPI SPAASAVSKASFSLVLGALTGSTSPQ-----GCFLSPLSIVYALSLALN--  
SbSRP-11 -AAQRAFCLPLAGRVLAA-----SATG-----NAAVAPVAVHASLALAAA--  
OsSRP-14 -AAQRAFCLPLAGRVLAA-----AGTG-----NAAVSAPAVHVSALALAAG--  
SmSRP-1 -HDQTSFTLDLYKQVWQQQQESKPGSSSTDREEQHNEKNVLSPLSIAMAMAMAAA--  
PpSRP-1 -RQQTEFVLDLYRKIANR-----APEE-----NTVLSPLSISLALSMVAA--  
PpSRP-2 -AGQTQFTVDLYKTLVKG-----KESE-----NVVLSPLSVDLALAMLTA--  
PpSRP-3 -HGQTEFTIDLYKAVVKG-----KETE-----NAVLSPVCISLALAMVSA--  
PpSRP-4 -HGQMEFTIDLHKAVVKG-----KETK-----NVVLSPLSISLALAMVSA--  
SbSRP-8 -RDQAALCLLLRHLGGL-----DNGMPTG-----NVAFSPISFHSTLSLLAA--  
SbSRP-4 -----DNGMPTG-----  
OsSRP-7 -----DNGMPTG-----  
MtSRP-8 -NYNTELSFFFAENLFLK-----K-----NMVFSPLSLEMIFGIISA--  
SbSRP-7 -QDEAAFMRVLRHLASR-----DDGSRA-----NLAVSPLSLHAALALLAA--  
OsSRP-3 -RDETAMAMRLGLHARA-----PRGGGDK-----NLAVSPLSLHAALALLGA--  
AtSRP-4 -EKQYKAMMDLKE SVGNQ-----NDI-----VLRLTAPLINVILSIIAA--  
AtSRP-7 -KNQTHVAMILSGHVLS-----APKDS-----NVIFSPASINSAITMHAA--  
AtSRP-1 -KNQNEVSLLLVGKVI SA-----VAKNS-----NCVFSPASINAVLTVTAA--  
AtSRP-6 -KKQNDVAIFLTGVISS-----VAKNS-----NFVFSPASINAALTMVAASS  
FvSRP-12 -----MVFSPLSLHFALSLIAS--  
FvSRP-7 -----MVFSPLSLHFALSLIAS--  
FvSRP-11 -TSQSNVALELTKQLFLT-----EFKQ-----NMVFSPLSLHFSLSLVAS--  
FvSRP-2 -MDLEALDMDLEADM-----DLEALDMDLEADMLEAP--  
FvSRP-1 -SNQTDVAMKITKQLVES-----EFKDK-----NMIYSPLSIYIVLSLIAA--  
FvSRP-10 -SHQTDVALKIAKQLLDS-----EFKDK-----NMIYSPLSIHIVLSLIAA--  
FvSRP-9 -IKQTNVALQITKLLLET-----EFHGK-----NMIYSQSIHSSVS--  
FvSRP-14 -INQTNVALQITKQLLEQ-----EFHGK-----NMIYSQSIHIVLSLIAA--  
FvSRP-6 -KNQTDVALGITKHLLET-----LGKDK-----NMVYSPLSIHIGLGMIMS--  
FvSRP-4 -VRNQSDVALRITKELLET-----KGKDK-----NMVYSPLSIHVLSLIAA--  
FvSRP-13 -RDQTNVALEITKQLLLT-----E-----GKNK-----NVVFSPLSIHVLSMIAV--  
FvSRP-5 -QDQTKVALEITKQLLLN-----EKGKDK-----NVVFSPLSIHVLSLIAA--  
FvSRP-8 -QDQTNVALDITKQLLLN-----EKVKDK-----NVVFSPLSIHVLSMIAA--  
AtSRP-2 -ENQNNVVARLAKKVIET-----DVANGS-----NVVFSPLSINVLLSLIAA--  
AtSRP-3 -ENHNDVVRLTKHVIA-----VANGS-----NLVFSPLSINVLLSLIAA--  
AtSRP-8 -ENQTDVMVLLAKHV IPT-----VANGS-----NLVFSPLSINVLLCLIAA--  
SbSRP-16 -AQQTRFALCLAAAFSSP-----ALPVSNTT-----NAVFSPLSLHVALSLLAA--  
OsSRP-6b -----ALPVSNTT-----  
OsSRP-5 -AHQTRFAFRLLAAALSSP-RAHPAAGGAAGAGGS-----NVAFSPSLHVALSLVAA--  
OsSRP-6a -AHQTSFALRLAAALSSP-----AHPAGGAGR-----NVAFSPSLHVALSLVAA--  
SbSRP-2 -AGQTRFALRLTAALSS-----AAAAAPAR-----NTAFSPLSLHVLSLLAA--  
SbSRP-3 -GHQTRFALRLAAALSSP-----SPSASPAG-----NVAFSPSLHVALSLLAA--  
AtSRP-5 -SLQNQVSMNLA KHVIIT-----VSQNS-----NVIFSPASINVLSIIAA--  
FvSRP-3 -ANQTDVGLGITKLLQT-----EGKDK-----NVVYSPLSIHVLSLIAA--  
MtSRP-11 -ANLTKSSMNI--DLLSN-----PEFKER-----NVVFSPLSLQTTLSMVTN--  
MtSRP-9 -ANLTKNAMNITKHLVSK-----TEFKKK-----NVVLSPLSLQTTVLSIVAA--

MtSRP-6 -TNLTNVSMNITKHLLSN-----QKLKEK-----NVVFSPLSLNTVLSMIAT--  
MtSRP-16 -TNLTNVSLNITKHLLSN-----QKLNEK-----NVVFSPLSLNTVLMITA--  
MtSRP-3 -SNVKAWEVS-----EK-----  
MtSRP-4 -SNLNKFSVTIAKHLFSK-----EEFKEK-----NVVFSPLSLHVLSIIAA--  
MtSRP-10 -SNQTKVSLRIA KHLFSK-----ESEK-----NIVF-----  
MtSRP-12 -TNQTKVSLRIA KYLFSK-----ESEK-----NIVFSPLSLQVALSMIAA--  
MtSRP-1 -----  
MtSRP-13 -----  
MtSRP-14 -TNQTNVSLRIA KHLFLK-----ELDK-----NIVFSPLSLQVLSIIAA--  
MtSRP-5 -NNQNNVSLTIAKHLFSK-----ESHQDK-----NMVLSPLSLQVLSIIAT--  
MtSRP-2 -NQHSSVSLTIAKHLFSK-----ESHRNK-----NIVLSPLSLQVLSIIAA--  
MtSRP-7 -ANQTNVSLSVAKHLFSK-----ESDN-----NIVFSPLSLQVLSIIAS--  
MtSRP-15 -TNQTKVSLNMAKHLFSK-----ESDK-----NVVFSPLSLQVMLNIVAA--  
SbSRP-12 -DGQTALALRLAKHLAPP PPGGGGAGYSATASAAAANN--NVAFSPVSVHAALALTA--  
SbSRP-1 -AGLTSALRLAKQLAAN-----NKSSDRGNGG-----NLVFSPLSIYAALALVAA--  
SbSRP-9 -AGLTALALCFTRRLQLQAPPVVDVAGEPPGGPSTAAAANLVFSPVSVYAALALLA--  
OsSRP-10 -SGLTALSMRLTKQLSAA-----AASKAGAAG-----NLVFSPLSIYSVLSVVT--  
OsSRP-8 -SGLMGISLRLAEQFSAE-----EDGGGGG-----NLVFSPLSIYSALSVVT--  
OsSRP-12 -SGLAGMALRLAERLSLE-----EDSVGGG-----NLVFSPLSIYSALTVVT--  
SbSRP-15 -SGLTAFALRLAKHLAGA-----DKGAGVVGGGGQ-----NIVFSPLSIYAALALLA--  
OsSRP-9 -GGMTAFALRLAKRLADV-----GVSSNK-----NLVFSPLSIYAALALVAA--  
OsSRP-11 -GGLTAFALRLAKRLADD-----GDNSNR-----NVVFSPLSIYAALALVAS--  
OsSRP-15 -GGLTALAVRLADRLGAA-----SPGR-----NLAFSPLSVHAALSLAAA--  
SbSRP-10 -AGHAALSARLLKRI SSE-----AAAVGN-----NLVFSPLSIHVALVLMST--  
OsSRP-13 -----MGR-----  
SbSRP-13 ----MDYCLQVAWYPGME-----AITNQS-----NFI FSPMSLRAGLALLAV--  
SbSRP-14 ----MDCCLKVAWYAGMK-----AITEQS-----NFI FSPMSLRAGLALLAV--  
OsSRP-1 ----MDQCLQVAWIAGSD-----AITEQS-----NFI FSPMCLRAGLALLAT--  
OsSRP-2 ----MDYCLQVAWIAGTK-----AITEQS-----NFMFSPGLRAGLALLAT--  
SbSRP-5 -DDDATGCLRLARCVRGK-----AAGEGR-----NFMLSPLSLHAALALVAA--  
SbSRP-6 GADGGASCLPLARQAGVR-----AAARN-----NFI VSPLSFHAALALVAA--  
OsSRP-4 AEEAKVSCPLAREVGR-----AAAAGGQGR-----NFI VSPLSFHAALALVAD--

CrSRP-1 -GAGPKT-STHSELLAAIAGGAENAANLGE---GDLNSELGRMTMLLNGAGA-----  
VcSRP-1 -GAGPKS-PTHAELLRVIAGD-NGHVSESEL---NSELGRAMAL-MNGQCA-----  
SbSRP-11 -GA--RG-DTRRQVLQVLGGGGGKGAADA---ANVASRVVKR-VLKDRS-----  
OsSRP-14 -GA--RG-ATRRQVLQALGCGGGGGRGAADA---ANVASRVVKR-VLRDRS-----  
SmSRP-1 -GA--KG-QTLEQLTSVVRLP----NGSLM--HDFAQQLNSV-LLGVAR-----  
PpSRP-1 -GA--KG-PTLEQIANSIKIP----HGDLM--HKFSTHLANI-LQSDGE-----  
PpSRP-2 -GA--KG-PTREQISKCIKLP----QGKPL--HDFSSHLRKT-VLSNQO-----  
PpSRP-3 -GA--KG-PTREQIAKCIKLP----EGEPM--HNFSSQVKIA-LLADGS-----  
PpSRP-4 -GA--KG-PTRGEIAKCIKLP----EGDPM--HNFSSQLKTV-VLADGS-----  
SbSRP-8 -GA--SG-ATRDQIATFLGPA-----GAEAH---AALASKVASA-VLAGRD-----  
SbSRP-4 -----  
OsSRP-7 -----  
MtSRP-8 -GT--SG-DTQLELLRFLGLR----SMKDLVDLVKIRSDLLKH-FSPDHSAL-----  
SbSRP-7 -GA--RG-GTLDIEIASFLGPA-----GSAH---AALASYVALR-VFADGDGE-----  
OsSRP-3 -GA--RG-ETLDQIIAFLGPA-----GGPAH--AALASHVALC-SLADDS-----GPG  
AtSRP-4 -SSPGDT-DTADKIVSLLQAS-----STDKL--HAVSSEIVTT-VLADST-----  
AtSRP-7 -GP--GGDLVSGQILSFLRSS-----SIDEL--KTVFRELASV-VYADRS-----  
AtSRP-1 -NT--DNKTLRSFILSFLKSS-----STEET--NAIFHELASV-VFKDGS-----  
AtSRP-6 GGE--QGEELRSFILSFLKSS-----STDEL--NAIFREIASV-VLVDGS-----  
FvSRP-12 -GT--KG-PCLEQFLSFLKSR-----STHHL--NSLAHDIVTF-VLANAS-----PDE  
FvSRP-7 -----  
FvSRP-11 -GT--KG-PCLEDEFLSFLKSR-----STHHL--NSLAHDIVTF-VLASGSPSRPEIEER  
FvSRP-2 -AM--DLEALQKPI SNQTDVA-----MKITKQLVES-EFKNKNMVYSQW---  
FvSRP-1 -RT--NN-P---QLVYFLNSK-----SIDDL--NSIAFNLVTS-VLADST-----  
FvSRP-10 -RT--NN-P---HFVSFLNSK-----SIDDL--NSLAYNLVTS-VLADTP-----  
FvSRP-9 -----  
FvSRP-14 -RN--NC----PQLLSFLNSK-----SIAEL--NSLAGDLVTS-VLVDLP-----  
FvSRP-6 -GT--KG-HIQDQFLSFLKSK-----SINEL--NDLASNVVPL-VFADGE-----  
FvSRP-4 -GS--TKGHPLHDEMFLKFLKSR-----SIEQL--NELASNLVPL-VFADGT-----  
FvSRP-13 -GA--KG-SNQEKVLKFLKSE-----SINEL--NTLASVVAPL-VFADGS-----  
FvSRP-5 -GA--KG-SNQKRMLSFLKSK-----SIKEL--NTLASRVVSL-VFADGS-----  
FvSRP-8 -GA--KG-SIQKMLSFLKSK-----SIDAL--NTIASNVVPL-VFADGS-----  
AtSRP-2 -GS--NP-VTKEEILSFLMSP-----STDHL--NAVLA KIA-----DGGT-----  
AtSRP-3 -GS--CS-VTKEQILSFLMLP-----STDHL--NLVLAQII-----DGGT-----  
AtSRP-8 -GS--NC-VTKEQILSFLMLP-----SSDYL--NAVLA KTVSV-ALNDGM-----  
SbSRP-16 -GS--GG-ATRDQLLAALAGAHGPDAADSL--HALADQVARN-VMADGS-----  
OsSRP-6b -----  
OsSRP-5 -GA--GG-ATRDQLVSLLGVPGRG--TAEGL--HAFAEQVVQL-VLADSS-----  
OsSRP-6a -GA--GG-ATRDQLASALGGPG--SAEGL--HAFAEQLVQL-VLADAS-----  
SbSRP-2 -GA--GHATRDQLLTALGGG-DGPVAAEIL--HALSEQVVQL-VLADGS-----  
SbSRP-3 -GA--GG-ATRDQIAATLGGGGD--AAEGL--HALAEQVVQL-VLADGS-----  
AtSRP-5 -GS--AG-ATKDQILSFLKFS-----STDQL--NSFSEIVSA-VLADGS-----  
FvSRP-3 -GS--KG-PTQEQILSFLKSK-----FAGDL--NSFASLVAV-IFADGS-----  
MtSRP-11 -PS--TI-LTPCPLTSFP-----MCLKTR-----  
MtSRP-9 -GS--EG-PTQCQLLSFLGSK-----SIDHL--NSLSTHLFTS-VLDDAA-----  
MtSRP-6 -GS--EG-PTQKQLLSFLQSE-----SPGNL--KSLYSRLVSS-VLSDGA-----  
MtSRP-16 -GS--EG-PTQNQLLSFLQSE-----STGDL--KSLCSQLVSS-VLSDGA-----  
MtSRP-3 -----  
MtSRP-4 -GA--EG-PTQDQLLTFLQSR-----STDEL--KSLSSQLVSY-LLADAT-----



MtSRP-10 -----  
MtSRP-12 -GS--DG-PTREQLLDFLLSK-----STDHL--NSFASHLVSA-IISNAA-----  
MtSRP-1 -----  
MtSRP-13 -----  
MtSRP-14 -GS--EG-PTQQQLLDFLLSK-----STDHL--NDLASQLVSV-VLFDAA-----  
MtSRP-5 -GS--EG-PTQQQLLNFLQSK-----STYQL--NSFASTLVSV-ILKDA-----  
MtSRP-2 -GS--DG-STQQQLLDFLQSN-----STDQL--NSFASKLVSV-ILKDKA-----  
MtSRP-7 -GS--EG-PTQQQLFNFLQSK-----STDHL--NYFASQLVSV-ILSDAS-----  
MtSRP-15 -AS--EG-RTQQQLLEFLRSK-----SIDHL--NSFTSHL VSI-ILSDAA-----  
SbSRP-12 -GA--RG-ATLAQLLAFVLAGAP-----SAEEL--ADFGRRVADR-VLADRS-----  
SbSRP-1 -GA--PG-----AALDDSWLCS-ALGDGS-----  
SbSRP-9 -GA--RG-STLQELLDALGGD-----SRDDL--TAFAGRAGER-ALADRSR SRSRAG--  
OsSRP-10 -GA--RG-RTLTELLGALGAE-----SREKL--AANAGEMARALPAPGGGAAQ-----  
OsSRP-8 -GA--RG-TTLTELLAALGAP-----SRDAL--AKNAE IAR--ALAGGT-----  
OsSRP-12 -GA--RG-TTLAELLAALGAPS-----SRDAL--AEDAGEI VRALPGGSGT-----  
SbSRP-15 -GA--RG-TTLDEVLATLGAT-----SRDEI--AEFVSAVVER-ALADHSE-----  
OsSRP-9 -GA--RG-TTLDELLALLGAA-----SLDDL--EESVRRAVEV-GLADES-----  
OsSRP-11 -GA--RG-TTLDELVALLGAA-----SLDDL--EESVRRAVEV-GLADES-----  
OsSRP-15 -GA--AG-TLDEILAVLGAA-----SRDDL--AAFVGR TAET-ALADRG-----  
SbSRP-10 -AA--AG-ATLDEILRVAGAP-----SREEL--AAFVRD TVVDGVLD DQS-----  
OsSRP-13 -----VLADQA-----  
SbSRP-13 -GT--QG-PTLRQLLTF LGSE-----NTHHL--DAATARLLTN-----  
SbSRP-14 -GT--HG-ATLRELLTFLGSE-----NTHHL--DAATARLLS-----  
OsSRP-1 -GA--DG-ETLRQMLAFLGSE-----HIHQL--NATSAGLLAE-----  
OsSRP-2 -GT--DG-ETLRQLLAFLG SQ-----HIHQL--NAASAGLLAE-----  
SbSRP-5 -GA--NG-ETQAE LLRFLGSA-----SLDELRR-AAVTRLVVAA-----  
SbSRP-6 -GA--RG-ETQRELLGFLGSAE-----SLSEL--HGAAATALVA-RLNDLP-----  
OsSRP-4 -GA--RG-ETQRELLGFLGSP-----SLAELH--RSPTTRLVAR-----

CrSRP-1 -----GAAEGSASRMVLANSVWTHRGT-TLRKEYVD-AMQSLF DATARE-----  
VcSRP-1 -----SK-NGPSSEMVLANSLWT-RGM-TLKKAYVD-SMKSLFQATASE-----  
SbSRP-11 -----TS-GGP--RLAFAGGIWADTST-NLSPGFVE-AARSVYSSTARTADFN N-----  
OsSRP-14 -----TS-GGP--RLAFAGGVWADASR-SLSPFVFG-LAGNVYGSAAKKADFKN-----  
SmSRP-1 -----SDPRAP--ELSLANGVWVEQSL-KLRGEYKE-IIEKNYGASARPVDFKN-----  
PpSRP-1 -----QGL--ELSCANR I WVDQTI-QLKPTFQK-LLKDSYGEAASVDFRH-----  
PpSRP-2 -----GD-GGP--ELALANRLWVEQSV-KLKPAFQK-ILQESYGSEAA SVDFIS-----  
PpSRP-3 -----GA-GGP--QLSLANR I WVEQSV-KLKLEFQK-VLKDSYGEAASVDFRT-----  
PpSRP-4 -----GA-GGP--ELALANRVWVDES V-TLKPEFQK-ILKDSYGEAASVDFHA-----  
SbSRP-8 -----DG-GEGESKVR SATGVWVDATL-RLSPAFAD-TAAAIHKAEARSVNFRG-----  
SbSRP-4 -----MGVWVDAAL-RLNPAFAD-VAASQFRAAARKVAFSD-----  
OsSRP-7 -----MAVWVDASL-RLNPAFAD-TAASVFKA AVRSAG-----  
MtSRP-8 -----HL-DGP--VFSFTNGLWVPKSL-PLKSSF KD-TLTTMFNAAVSDLHTYN-----  
SbSRP-7 -----GE-GGT--TVRFANGVWVAADL-QLKASFAR-VAAKHYRAEARQAFPKT-----  
OsSRP-3 D---DR-GGP--KVRFANGVWVDAAL-RLKAAYAR-VVADKYRAEARPV SFRD-----  
AtSRP-4 -----AS-GGP--TISAANGLWIEKTL-NVEPSFKD-LLLSYKAAFN RVDFRT-----  
AtSRP-7 -----AT-GGP--KITAANGLWIDKSL-PTDPKFKD-LFENFFKAVYVPVDFRS-----  
AtSRP-1 -----ET-GGP--KIAAVNGVWMEQSL-SCNPDWED-LFLNFFKASF AKVDFRH-----  
AtSRP-6 -----KK-GGP--KIAVNGVMMDQSL-SVNPLSKD-LFKNFFSAAFAQVDFRSKCNVLN-----  
FvSRP-12 NDIIRG--PGP--RLSFANGVWVDKSL-PFKPDFKH-LVDIAYMAALEEVD FKF-----  
FvSRP-7 -----MAALEEVD FKS-----  
FvSRP-11 -----YG-PGP--RLSFANGVWVDKSL-PFKPYFKH-VVD TAYMAALEEVD FKS-----  
FvSRP-2 -----Q--ADP--RLNFTNGLWVDEST-PLEESYKK-VALDSYKAALN-----  
FvSRP-1 -----SK-GGP--LLNFTNGLWVDESM-PLEESYKQ-VVLD SYKAALNEVD FKT-----  
FvSRP-10 -----SR-GGP--RLNFTNGLWVDEYT-PLEESYKK-VLLDLYKAALNEVD FKT-----  
FvSRP-9 -----LEESHKK-VVLD SYKAALNHVDIKT-----  
FvSRP-14 -----TR-GGP--RLNFTNGVWVDESE-PLDESYKK-VVLD SYKAALNHVD FKT-----  
FvSRP-6 -----SK-GGP--RISFANGVWVEESL-HVKPCFKE-ALDATYK GALNHVD FRT-----  
FvSRP-4 -----TS-GGP--SLAFANGVWVETS L-PVKASFKE-VLDNAYKAVLKQVDFRT-----  
FvSRP-13 -----EH-GGP--LLSIANGVWIDQSL-SIKHSFKN-VLETDYKAALKQVDFKN-----  
FvSRP-5 -----KL-GGP--LLSFANGVWMDQSL-SIKPSFQN-VLGT DYKAALKQVDFKT-----  
FvSRP-8 -----KL-GGP--LLSFANG-----VLDNDYKAALKQVDFKT-----  
AtSRP-2 -----ER-SDL--CLSTAHGVWIDKSS-YLKPSFKE-LLENSYKASC SQVDFAT-----  
AtSRP-3 -----EK-SDL--RLSIANGVWIDKFF-SLKLSFKD-LLENSYKATCSQVDFAS-----  
AtSRP-8 -----ER-SDL--HLSTAYGVWIDKSL-SFKPSFKD-LLENSYNATCNQVDFAT-----  
SbSRP-16 -----EA-GGP--RIAFADAVLADASW-KLNPAFQE-LAVGKYKAH THSVDFQK-----  
OsSRP-6b -----  
OsSRP-5 -----PA-GGP--RVAFADGVFIDSSL-SLMKSFKD-VAVGKYKAETHSVDFQT-----  
OsSRP-6a -----GA-GGP--RVAFADGVFVDASL-SLKKTFGD-VAVGKYKAETHSVDFQT-----  
SbSRP-2 -----GV-GGP--RVAFADAVFVDASL-KLKSAFE E-VAVGKYKAETHSVDFQE-----  
SbSRP-3 -----GA-GGP--RVAFADGVFVDASL-KLKPAFQE-VAVGKYRADTQPVDFQK-----  
AtSRP-5 -----AN-GGP--KLSVANGAWIDKSL-SFKPSFKQ-LLED SYKAASNQAD FQS-----  
FvSRP-3 -----PT-GGP--RLSFANGI WVDQPL-ALKPSFKE-VVESAYKAAVNQVDFQT-----  
MtSRP-11 -----GL--SLSAYAIWVEKTL-SLYPSFKE-TIAINYKATLQSHDFIN-----  
MtSRP-9 -----PF-GGP--QLSFVNSVWFEKSL-SLYPSFKE-IVDTNYFATLRSLDFIN-----  
MtSRP-6 -----PA-GGP--CLSYVNGVWVEQSL-PLQPSFKQ-LMTTDFKATLAEVDFVN-----  
MtSRP-16 -----PA-GGP--CLSHVNGVWVEQSL-PLQPSFKQ-LMTTDFKATLAAVDFIN-----  
MtSRP-3 -----S-----  
MtSRP-4 -----PA-GGP--LLSFVNGVWVEQSL-TFQHSFKE-TVATDFKSNTASVDFVN-----  
MtSRP-10 -----FPTF-----  
MtSRP-12 -----PS-GGP--CLSFLNGVWVDQSR-SLQPSFQQ-IVSNDYKATLSSVDFKN-----  
MtSRP-1 -----  
MtSRP-13 -----MFVIGVFSH-----

MtSRP-14 -----PT-GGP--RFSFVNGVWVEQTL-SLQPSFKE-IVSSDYKATLLSVDFKT-----  
 MtSRP-5 -----PASNEL---CLMISRTRYV-----SISPLF---SLQNTY-----  
 MtSRP-2 -----PA-GGP--RLSFVDGWWVEKTL-SLQPSFKQ-IVSNDYKANLSSVDFKN-----  
 MtSRP-7 -----PA-GGP--LLSFVDGWWVDQTL-SLQPSFQQ-IVSTHFKAALSSVDFQN-----  
 MtSRP-15 -----PS-GGS--RLSFTQQRVWVDQTL-SLQPSFKE-TMVTDYKATLASVDFQN-----  
 SbSRP-12 -----DA-GGP--RVLFGGGVWVDAARGGLTEAFRD-VAAEAYKSEARTVVSFTE-----  
 SbSRP-1 -----GS-GGP--LIASACGVWHDDDEM-VLKPVFRA-TAVECFKAEVRAVDFQT-----  
 SbSRP-9 -----AV-GGP--AVAFACGAWLDAAW-ALLPAFRDAAAAASYNAEARAVDFGN-----  
 OsSRP-10 -----PG-GGP--RVAHACGVWHERTR-TVRPAFRD-AAAASFNAALAVDFLN-----  
 OsSRP-8 -----AT-GGP--RVAHACGLWHERTR-SLKLAFRD-AAAASFNAATRAVDFLA-----  
 OsSRP-12 -----AT-GGP--RVAHACGLWHDRRR-NVKPAFRD-AAAASFQATRAVDFLA-----  
 SbSRP-15 -----TG-SAP--RVAFACALWHEKMM-ALKPAYRA-AAVQSYKAETHAADFVN-----  
 OsSRP-9 -----AS-GGP--RVSDACGVWHDDEL-ELKPAYRA-AAAGTYKAVTRAANFQR-----  
 OsSRP-11 -----ES-GGP--RVSYACGVWHDDEL-ALKPAYRA-----ADFQR-----  
 OsSRP-15 -----PESLGP--RVVFAPGVWCDAAR-PFKPAYRA-AVAAEYNAEATVVDFKN-----  
 SbSRP-10 -----AT-GGP--TISYACGTWTDKAW-PLRPANVD-AIVGTFKGNWALTSKT-----  
 OsSRP-13 -----PT-GGP--CVSFACGSWLDASY-SLKPAYRD-AIVGTYKGAASTVDFKN-----  
 SbSRP-13 -----VS-TWP--QLSFAAGIFVDRTL-FLAPEFVS-SAVSAHYAVARSVDFKN-----  
 SbSRP-14 -----NLSFAAGIFVDRTL-LLKPETRS-----SCPPPLLT-----  
 OsSRP-1 -----MQ-AWP--QLVFAAGIFVDRSL-RLRPEFKS-TAAAAHGHIHAICGLPE-----  
 OsSRP-2 -----MR-AWP--QLSFAAGIFVDRSL-RLRPEFQS-TAAAAHGAFPRSVDVFN-----  
 SbSRP-5 -----LR-GIP--QTSFACGVWVDRRC-PLREEFAD-VAGAVYAAVAESVDFVS-----  
 SbSRP-6 -----QTSFACGVWVDRRR-ALTPEFRD-AAASRYAAVADSVDVFN-----  
 OsSRP-4 -----LR-HLP--NTSFACGVWVDRGR-ALTPEFAD-AAASRYAAVAEPADFAT-----

CrSRP-1 -----AV-----  
 VcSRP-1 -----AI-----  
 SbSRP-11 -----K-----PE-----  
 OsSRP-14 -----K-----PE-----  
 SmSRP-1 -----K-----AQ-----  
 PpSRP-1 -----K-----ST-----  
 PpSRP-2 -----K-----AA-----  
 PpSRP-3 -----K-----AD-----  
 PpSRP-4 -----K-----AD-----  
 SbSRP-8 -----N-----LR-----  
 SbSRP-4 -----N-----PE-----  
 OsSRP-7 -----N-----PA-----  
 MtSRP-8 -----R-----GV-----  
 SbSRP-7 -----M-----PE-----  
 OsSRP-3 -----K-----LE-----  
 AtSRP-4 -----K-----AD-----  
 AtSRP-7 -----E-----AE-----  
 AtSRP-1 -----K-----AE-----  
 AtSRP-6 KLGLAVSLLESIFHISTLFDKFKALIRS-----AE-----  
 FvSRP-12 -----N-----PK-----  
 FvSRP-7 -----N-----PK-----  
 FvSRP-11 -----N-----PK-----  
 FvSRP-2 -----D-----PE-----  
 FvSRP-1 -----D-----PE-----  
 FvSRP-10 -----D-----PE-----  
 FvSRP-9 -----N-----PE-----  
 FvSRP-14 -----N-----PK-----  
 FvSRP-6 -----R-----AE-----  
 FvSRP-4 -----K-----PE-----  
 FvSRP-13 -----E-----PE-----  
 FvSRP-5 -----K-----PE-----  
 FvSRP-8 -----E-----PE-----  
 AtSRP-2 -----K-----PV-----  
 AtSRP-3 -----K-----PS-----  
 AtSRP-8 -----K-----PA-----  
 SbSRP-16 -----K-----AA-----  
 OsSRP-6b -----K-----AA-----  
 OsSRP-5 -----K-----AA-----  
 OsSRP-6a -----KWLLE-----PS-----  
 SbSRP-2 -----K-----AA-----  
 SbSRP-3 -----K-----AA-----  
 AtSRP-5 -----K-----AV-----  
 FvSRP-3 -----K-----AA-----  
 MtSRP-11 -----K-----PD-----  
 MtSRP-9 -----K-----AD-----  
 MtSRP-6 -----K-----AD-----  
 MtSRP-16 -----K-----AD-----  
 MtSRP-3 -----K-----AL-----  
 MtSRP-4 -----K-----AF-----  
 MtSRP-10 -----K-----PA-----  
 MtSRP-12 -----K-----AT-----  
 MtSRP-1 -----K-----AV-----  
 MtSRP-13 -----K-----AV-----  
 MtSRP-14 -----K-----TT-----  
 MtSRP-5 -----K-----AV-----  
 MtSRP-2 -----KICFYICSLF-----TT-----  
 MtSRP-7 -----K-----AV-----

MtSRP-15 -----KVFSSFAGLAPYPASSDVHENEMLNQFAQWILSIGDGKVGDDTDGEAVVEIPS  
 SbSRP-12 -----E-----PE  
 SbSRP-1 -----K-----AE  
 SbSRP-9 -----Q-----PA  
 OsSRP-10 -----N-----PE  
 OsSRP-8 -----N-----PE  
 OsSRP-12 -----N-----PE  
 SbSRP-15 -----K-----PE  
 OsSRP-9 -----Q-----PK  
 OsSRP-11 -----Q-----PK  
 OsSRP-15 -----KVGYSILIDAFILLLDPSMIDQCVLDLVSEKAE  
 SbSRP-10 -----SSILSLHHTILLRC-----PK  
 OsSRP-13 -----H-----PV  
 SbSRP-13 -----Q-----PA  
 SbSRP-14 -----R-----PS  
 OsSRP-1 -----PD  
 OsSRP-2 -----Q-----AN  
 SbSRP-5 -----Q-----AE  
 SbSRP-6 -----E-----PE  
 OsSRP-4 -----Q-----PE

CrSRP-1 N-----  
 VcSRP-1 N-----  
 SbSRP-11 D-----  
 OsSRP-14 D-----  
 SmSRP-1 E-----  
 PpSRP-1 E-----  
 PpSRP-2 E-----  
 PpSRP-3 E-----  
 PpSRP-4 E-----  
 SbSRP-8 G-----  
 SbSRP-4 A-----  
 OsSRP-7 A-----  
 MtSRP-8 E-----  
 SbSRP-7 E-----  
 OsSRP-3 E-----  
 AtSRP-4 E-----  
 AtSRP-7 E-----  
 AtSRP-1 E-----  
 AtSRP-6 E-----  
 FvSRP-12 Q-----  
 FvSRP-7 Q-----  
 FvSRP-11 Q-----  
 FvSRP-2 -----  
 FvSRP-1 Q-----  
 FvSRP-10 K-----  
 FvSRP-9 Q-----  
 FvSRP-14 Q-----  
 FvSRP-6 E-----  
 FvSRP-4 E-----  
 FvSRP-13 E-----  
 FvSRP-5 E-----  
 FvSRP-8 E-----  
 AtSRP-2 E-----  
 AtSRP-3 E-----  
 AtSRP-8 E-----  
 SbSRP-16 E-----  
 OsSRP-6b -----  
 OsSRP-5 E-----  
 OsSRP-6a NLANIDWEHYLLLPSLEKKLEKYGKIFLVFTIVGIIYVIMWFPFTAILEIMSLKDDEPIT  
 SbSRP-2 Q-----  
 SbSRP-3 E-----  
 AtSRP-5 E-----  
 FvSRP-3 E-----  
 MtSRP-11 E-----  
 MtSRP-9 E-----  
 MtSRP-6 E-----  
 MtSRP-16 E-----  
 MtSRP-3 E-----  
 MtSRP-4 E-----  
 MtSRP-10 E-----  
 MtSRP-12 E-----  
 MtSRP-1 -----  
 MtSRP-13 -----  
 MtSRP-14 EVTKEGNLWAEKETNGLIKELPPRSVDSLTRLIFANALYFKGAWSEKFDVLKTKDYDFH  
 MtSRP-5 E-----  
 MtSRP-2 KFKCINF-----  
 MtSRP-7 E-----  
 MtSRP-15 DLLVDHSGDPIGDIVAATYPGVVENLVDATFFQDRAILAPTLLELVEKVNDYVMAMIPGDE  
 SbSRP-12 A-----  
 SbSRP-1 E-----  
 SbSRP-9 EK-----

OsSRP-10 E-----  
OsSRP-8 E-----  
OsSRP-12 E-----  
SbSRP-15 K-----  
OsSRP-9 R-----  
OsSRP-11 S-----  
OsSRP-15 E-----  
SbSRP-10 E-----  
OsSRP-13 E-----  
SbSRP-13 A-----  
SbSRP-14 HSLSISRTF-----  
OsSRP-1 HEGA-----  
OsSRP-2 A-----  
SbSRP-5 E-----  
SbSRP-6 A-----  
OsSRP-4 Q-----

CrSRP-1 -----  
VcSRP-1 -----  
SbSRP-11 -----  
OsSRP-14 -----  
SmSRP-1 -----  
PpSRP-1 -----  
PpSRP-2 -----  
PpSRP-3 -----  
PpSRP-4 -----  
SbSRP-8 -----  
SbSRP-4 -----  
OsSRP-7 -----  
MtSRP-8 -----  
SbSRP-7 -----  
OsSRP-3 -----  
AtSRP-4 -----  
AtSRP-7 -----  
AtSRP-1 -----  
AtSRP-6 -----  
FvSRP-12 -----  
FvSRP-7 -----  
FvSRP-11 -----  
FvSRP-2 -----  
FvSRP-1 -----  
FvSRP-10 -----  
FvSRP-9 -----  
FvSRP-14 -----  
FvSRP-6 -----  
FvSRP-4 -----  
FvSRP-13 -----  
FvSRP-5 -----  
FvSRP-8 -----  
AtSRP-2 -----  
AtSRP-3 -----  
AtSRP-8 -----  
SbSRP-16 -----  
OsSRP-6b -----  
OsSRP-5 -----  
OsSRP-6a HWTSGKAAE-----  
SbSRP-2 -----  
SbSRP-3 -----  
AtSRP-5 -----  
FvSRP-3 -----  
MtSRP-11 -----  
MtSRP-9 -----  
MtSRP-6 -----  
MtSRP-16 -----  
MtSRP-3 -----  
MtSRP-4 -----  
MtSRP-10 -----  
MtSRP-12 -----  
MtSRP-1 -----  
MtSRP-13 -----  
MtSRP-14 LLNGSSVKVPFMTSEENQFIEAYGGFKVLRRLPYKKGKDKRRFSMYIFLPNAKDGLPALVE-----  
MtSRP-5 -----  
MtSRP-2 -----  
MtSRP-7 -----  
MtSRP-15 KEYLSCDSVCKCDDDIGVDHRWITTDFLNDIKCSGMPNHRLCLKVGVFVMLLRNVDQASG-----  
SbSRP-12 -----  
SbSRP-1 -----  
SbSRP-9 -----  
OsSRP-10 -----  
OsSRP-8 -----  
OsSRP-12 -----  
SbSRP-15 -----

OsSRP-9 -----  
OsSRP-11 -----  
OsSRP-15 -----  
SbSRP-10 -----  
OsSRP-13 -----  
SbSRP-13 -----  
SbSRP-14 -----  
OsSRP-1 -----  
OsSRP-2 -----  
SbSRP-5 -----  
SbSRP-6 -----  
OsSRP-4 -----

CrSRP-1 -----  
VcSRP-1 -----  
SbSRP-11 -----  
OsSRP-14 -----  
SmSRP-1 -----  
PpSRP-1 -----  
PpSRP-2 -----  
PpSRP-3 -----  
PpSRP-4 -----  
SbSRP-8 -----  
SbSRP-4 -----  
OsSRP-7 -----  
MtSRP-8 -----  
SbSRP-7 -----  
OsSRP-3 -----  
AtSRP-4 -----  
AtSRP-7 -----  
AtSRP-1 -----  
AtSRP-6 -----  
FvSRP-12 -----  
FvSRP-7 -----  
FvSRP-11 -----  
FvSRP-2 -----  
FvSRP-1 -----  
FvSRP-10 -----  
FvSRP-9 -----  
FvSRP-14 -----  
FvSRP-6 -----  
FvSRP-4 -----  
FvSRP-13 -----  
FvSRP-5 -----  
FvSRP-8 -----  
AtSRP-2 -----  
AtSRP-3 -----  
AtSRP-8 -----  
SbSRP-16 -----  
OsSRP-6b -----  
OsSRP-5 -----  
OsSRP-6a -----  
SbSRP-2 -----  
SbSRP-3 -----  
AtSRP-5 -----  
FvSRP-3 -----  
MtSRP-11 -----  
MtSRP-9 -----  
MtSRP-6 -----  
MtSRP-16 -----  
MtSRP-3 -----  
MtSRP-4 -----  
MtSRP-10 -----  
MtSRP-12 -----  
MtSRP-1 -----  
MtSRP-13 -----  
MtSRP-14 KLAAPHELLHYSLHPAEAEVVEFRIPRFKISFELETSDMFKELGVILPFTRGGLTKMVDS  
MtSRP-5 -----  
MtSRP-2 -----  
MtSRP-7 -----  
MtSRP-15 LCNGTRLIIIVSLGKNVICARVIGGTHAGEVSYIPRMNLIPSGANVSITFERCQFPLVLSF  
SbSRP-12 -----  
SbSRP-1 -----  
SbSRP-9 -----  
OsSRP-10 -----  
OsSRP-8 -----  
OsSRP-12 -----  
SbSRP-15 -----  
OsSRP-9 -----  
OsSRP-11 -----  
OsSRP-15 -----  
SbSRP-10 -----

|          |                                                              |
|----------|--------------------------------------------------------------|
| OsSRP-13 | -----                                                        |
| SbSRP-13 | -----                                                        |
| SbSRP-14 | -----                                                        |
| OsSRP-1  | -----                                                        |
| OsSRP-2  | -----                                                        |
| SbSRP-5  | -----                                                        |
| SbSRP-6  | -----                                                        |
| OsSRP-4  | -----                                                        |
| CrSRP-1  | -----                                                        |
| VcSRP-1  | -----                                                        |
| SbSRP-11 | -----                                                        |
| OsSRP-14 | -----                                                        |
| SmSRP-1  | -----                                                        |
| PpSRP-1  | -----                                                        |
| PpSRP-2  | -----                                                        |
| PpSRP-3  | -----                                                        |
| PpSRP-4  | -----                                                        |
| SbSRP-8  | -----                                                        |
| SbSRP-4  | -----                                                        |
| OsSRP-7  | -----                                                        |
| MtSRP-8  | -----                                                        |
| SbSRP-7  | -----                                                        |
| OsSRP-3  | -----                                                        |
| AtSRP-4  | -----                                                        |
| AtSRP-7  | -----                                                        |
| AtSRP-1  | -----                                                        |
| AtSRP-6  | -----                                                        |
| FvSRP-12 | -----                                                        |
| FvSRP-7  | -----                                                        |
| FvSRP-11 | -----                                                        |
| FvSRP-2  | -----                                                        |
| FvSRP-1  | -----                                                        |
| FvSRP-10 | -----                                                        |
| FvSRP-9  | -----                                                        |
| FvSRP-14 | -----                                                        |
| FvSRP-6  | -----                                                        |
| FvSRP-4  | -----                                                        |
| FvSRP-13 | -----                                                        |
| FvSRP-5  | -----                                                        |
| FvSRP-8  | -----                                                        |
| AtSRP-2  | -----                                                        |
| AtSRP-3  | -----                                                        |
| AtSRP-8  | -----                                                        |
| SbSRP-16 | -----                                                        |
| OsSRP-6b | -----                                                        |
| OsSRP-5  | -----                                                        |
| OsSRP-6a | -----                                                        |
| SbSRP-2  | -----                                                        |
| SbSRP-3  | -----                                                        |
| AtSRP-5  | -----                                                        |
| FvSRP-3  | -----                                                        |
| MtSRP-11 | -----                                                        |
| MtSRP-9  | -----                                                        |
| MtSRP-6  | -----                                                        |
| MtSRP-16 | -----                                                        |
| MtSRP-3  | -----                                                        |
| MtSRP-4  | -----                                                        |
| MtSRP-10 | -----                                                        |
| MtSRP-12 | -----                                                        |
| MtSRP-1  | -----                                                        |
| MtSRP-13 | -----                                                        |
| MtSRP-14 | PLVGNSLSVSKIFHKSFIEVNEEGTEAAAASAGCYEEELDSKERIDFVADHPFLFLIREN |
| MtSRP-5  | -----                                                        |
| MtSRP-2  | -----                                                        |
| MtSRP-7  | -----                                                        |
| MtSRP-15 | AMTINKSQGQTLTSGLYLPRPVFTHGQLYVAVSRVKSRSGLKILITDENGSPSSSTVNV  |
| SbSRP-12 | -----                                                        |
| SbSRP-1  | -----                                                        |
| SbSRP-9  | -----                                                        |
| OsSRP-10 | -----                                                        |
| OsSRP-8  | -----                                                        |
| OsSRP-12 | -----                                                        |
| SbSRP-15 | -----                                                        |
| OsSRP-9  | -----                                                        |
| OsSRP-11 | -----                                                        |
| OsSRP-15 | -----                                                        |
| SbSRP-10 | -----                                                        |
| OsSRP-13 | -----                                                        |
| SbSRP-13 | -----                                                        |
| SbSRP-14 | -----                                                        |
| OsSRP-1  | -----                                                        |

|          |                                                 |
|----------|-------------------------------------------------|
| OsSRP-2  | -----                                           |
| SbSRP-5  | -----                                           |
| SbSRP-6  | -----                                           |
| OsSRP-4  | -----                                           |
| CrSRP-1  | -----GAKDVNAW--VEGVTKGMIK-----                  |
| VcSRP-1  | -----GAKDINDW--VEGATRGMIK-----                  |
| SbSRP-11 | -----AAQINMW--VKESTKGTAT-----                   |
| OsSRP-14 | -----APDQINSW--VKDSTKGTVT-----                  |
| SmSRP-1  | -----SRGLVNSW--VAEATKKKIE-----                  |
| PpSRP-1  | -----ARETINKW--AENKTHGKIA-----                  |
| PpSRP-2  | -----ALAKVNW--AKDETHGKIE-----                   |
| PpSRP-3  | -----ARGKVNEW--AKEETHGKIE-----                  |
| PpSRP-4  | -----ALAKVNEW--AKEATHEKIE-----                  |
| SbSRP-8  | -----ATAEINW--YERTTGGLIK-----                   |
| SbSRP-4  | -----AREEINGW--FRSETGGLVQPDEREIDSEDEEQLVQFDMDEK |
| OsSRP-7  | -----ARAEINW--FSSQTGGFVK-----                   |
| MtSRP-8  | -----VIEEVNSW--VTRKTNGI IK-----                 |
| SbSRP-7  | -----ARSQINW--VASATAGRIK-----                   |
| OsSRP-3  | -----ARREINW--FESATAGRIK-----                   |
| AtSRP-4  | -----VNREVNW--VEKQTNGLIT-----                   |
| AtSRP-7  | -----VRKEVNW--VEHHTNGLIK-----                   |
| AtSRP-1  | -----VRLDVNTW--ASRHTNDLIK-----                  |
| AtSRP-6  | -----VRTEVNAW--ASSHTNGLIK-----                  |
| FvSRP-12 | -----VSVEVNW--AEKETNGLIK-----                   |
| FvSRP-7  | -----VTVEVNW--VEKETNGLIK-----                   |
| FvSRP-11 | -----VSIQVNSW--AEKETNGLIK-----                  |
| FvSRP-2  | -----                                           |
| FvSRP-1  | -----VRIQVNSW--VEEQTKGRIP-----                  |
| FvSRP-10 | -----VRIQVNSW--VEKETRGLTP-----                  |
| FvSRP-9  | -----LRSQVNAW--VGKETKGLIP-----                  |
| FvSRP-14 | -----VRSQVNAW--VKKETKGLIP-----                  |
| FvSRP-6  | -----VRYEVNSW--VDKKTSGLIK-----                  |
| FvSRP-4  | -----ARCEVNW--VEKVTRGLIK-----                   |
| FvSRP-13 | -----VRREVNSW--GEEETKGLIE-----                  |
| FvSRP-5  | -----VRREVNSW--GKKETKGLIE-----                  |
| FvSRP-8  | -----VRREVNSW--GEKETKGLIK-----                  |
| AtSRP-2  | -----VIDEVNIW--ADVHTNGLIK-----                  |
| AtSRP-3  | -----VIDEVNTW--AEVHTNGLIK-----                  |
| AtSRP-8  | -----VINEVNAW--AEVHTNGLIK-----                  |
| SbSRP-16 | -----VAAQVNTW--VEEVTSGTIK-----                  |
| OsSRP-6b | -----VLGQVNSW--VDRVTSGLIK-----                  |
| OsSRP-5  | -----VASQVNSW--VDRVTSGLIK-----                  |
| OsSRP-6a | -----VASQVNSW--VEKVTSGLIK-----                  |
| SbSRP-2  | -----VAGEVNW--VEKVTSGLIK-----                   |
| SbSRP-3  | -----AAGKVNSW--VEKITSGLIK-----                  |
| AtSRP-5  | -----VIAEVNSW--AEKETNGLIT-----                  |
| FvSRP-3  | -----VAAGVNLW--AEKETSGLIK-----                  |
| MtSRP-11 | -----AVKKVNLW--ATEKTNGLIT-----                  |
| MtSRP-9  | -----AVKKVNAW--AKKETNGRIG-----                  |
| MtSRP-6  | -----VRKEVNVW--AEKETKGLIK-----                  |
| MtSRP-16 | -----VIKEVNLW--ANKETKGF IN-----                 |
| MtSRP-3  | -----VRKEVNLW--AEKKDK-----                      |
| MtSRP-4  | -----GRKEVNLW--AEKETNGLIK-----                  |
| MtSRP-10 | -----ALKEVNLW--AEKETNGLIK-----                  |
| MtSRP-12 | -----VLQEVNLW--AEKETNGLIK-----                  |
| MtSRP-1  | -----                                           |
| MtSRP-13 | -----                                           |
| MtSRP-14 | STGTILFVGQVDEGDAIEVTKEVNLW--AEKETNGLIK-----     |
| MtSRP-5  | -----VNNEVNLW--AERETNGLIK-----                  |
| MtSRP-2  | -----VFGQRSEFM--GCKKTNGI IK-----                |
| MtSRP-7  | -----VTNEVNW--AEKETNGLIK-----                   |
| MtSRP-15 | VYQEC-----LTNEVNIW--AEKETNGLIK-----             |
| SbSRP-12 | -----AVEMINSW--VKKATDNLIN-----                  |
| SbSRP-1  | -----ARQEINSW--VSEATKGLIT-----                  |
| SbSRP-9  | -----AVGEINRC--VAAATNNHID-----                  |
| OsSRP-10 | -----ARKEINSW--VAAATENLID-----                  |
| OsSRP-8  | -----ARKEINSW--VAAATENLID-----                  |
| OsSRP-12 | -----ARNEINSW--VAAATENLID-----                  |
| SbSRP-15 | -----AREKINRW--VSKATKGLIT-----                  |
| OsSRP-9  | -----SRKKINKW--VSKATNKLIP-----                  |
| OsSRP-11 | -----SRKKINKW--VSKATNKLIR-----                  |
| OsSRP-15 | -----ARKQINAW--ARRATGKLIT-----                  |
| SbSRP-10 | -----SRKQINAW--AAKATRNLIT-----                  |
| OsSRP-13 | -----ARKEINAW--VARATKNLIT-----                  |
| SbSRP-13 | -----ATAEMNAF--VEQATAGRIR-----                  |
| SbSRP-14 | -----LTAEMNAF--VEQATAGRIR-----                  |
| OsSRP-1  | -----LNQRHPPW--HLEQRHDVRPC-----                 |
| OsSRP-2  | -----AAAEVNRFF--ISQATNGRLN-----                 |
| SbSRP-5  | -----ARQRINDFVNVDATKGLIG-----                   |
| SbSRP-6  | -----ARRRVNAF--VGEATRGLIG-----                  |
| OsSRP-4  | -----ARERVNAF--VSDATEGLIR-----                  |

CrSRP-1 ----DL-VQ-----TDQWDA-----ILANAIYFKGFWTHA--FKKEDTFPGEFT-  
VcSRP-1 ----DL-IQ-----TE-----NFHAVLANAIYFKGLWEHA--FKPELTQQGEFTT  
SbSRP-11 ----SL-LL-----DGLIDQ-----NTGLVIGSALYFRGRWLDL--ADIRSTAVQKFCF  
OsSRP-14 ----TL-LP-----AGTIDQ-----NTGLVLGSALYFRGRWLDL--DDLRRTEQKFFC  
SmSRP-1 ----EL-LP-----EGSVDP-----QTRLILASAIYFKGAWKQK--LDPSQTRDGI FHL  
PpSRP-1 ----NV-LP-----PDAVSA-----HTKAILANAIYFNGSWENR--FDSSMTKDDDFHL  
PpSRP-2 ----NL-LP-----AGSVDH-----DTRVVLANALYFKGAWKKQ--FDDYHTREEDFYL  
PpSRP-3 ----DL-LP-----PGSVDQ-----GTHIVLANALYFKGAWKKP--FEEKDTKDGEFFL  
PpSRP-4 ----EL-LP-----TGSVDQ-----MTRVVLANALYFKGAWKKP--FEDEDTKHGEFFL  
SbSRP-8 ----NM-LS-----EGDCHA-----STAVVGNVSYFDGYWRDP--FIPKYTEEGPFYV  
SbSRP-4 SLFDDI-LA-----EGSIDA-----GTAVVLASSLYFNCNWDYD--FYPSGTEEGTFHV  
OsSRP-7 ----DI-LSNSIDDDDDGSGGGGGAISASVFLANSLYFNA YWDHP--FFPHLTEEGDFHV  
MtSRP-8 ----GI-LQ-----PMSITN-----ETQLLFINTVCFKGEWENP--FPTCLTALHDFTL  
SbSRP-7 ----DL-LP-----TGCLHR-----GTPAVLANALYFKGAWERK--FDACLTRDEAFFL  
OsSRP-3 ----DF-LP-----KDAVDR-----ATPAVLGNALYFKGDWESK--FDARSTSDVDFYL  
AtSRP-4 ----NL-LP-----SNPKSA-----PLTDHIFANALFFNGRWSQ--FDPSTLTKDSDFHL  
AtSRP-7 ----DL-LP-----DGSVTS-----LTNKIYANALSFKGAWKRP--FEKYTRDNDFYL  
AtSRP-1 ----EI-LP-----RGSVTS-----LTNWIYGNALYFKGAWEKA--FDKSMTRDKPFHL  
AtSRP-6 ----DL-LP-----RGSVTS-----LTDRVYGSALYFKGTWEEK--YKSMTKCKPFYL  
FvSRP-12 ----DI-LP-----ADV VNS-----KTVLILANALYFKAYWAEK--FSPSNTKENDFYL  
FvSRP-7 ----DI-LP-----PDAVNN-----LTKLIFANALYFKAYWVKK--FSKFSTRKRN FYL  
FvSRP-11 ----DI-LP-----ADAVDS-----NTKLIFANALYFKAYVVEK--FSKSATRKRN FYL  
FvSRP-2 ----EI-LP-----PGSVHT-----VTGLIYANALYFKATWDDYFHKPPKSKDLK FYL  
FvSRP-1 ----KI-LP-----PGSVHS-----ATSLIFANALYFKATWEDDYFYKPRKSKDLK FYL  
FvSRP-10 ----EI-LP-----PGSVHS-----ATGLIFANALYFKATWNGDYFYKPPKSEDLK FYL  
FvSRP-9 ----QL-LL-----PGSVNT-----WTILIFANALYFRATWDDM--YFEESETKHEHFFL  
FvSRP-14 ----QI-LP-----PGSIKI-----ETSLICVNALYFKATWSKP--YFTKPKTKEHEFFL  
FvSRP-6 ----DI-LS-----PGSVSR-----KTDLILASALYFKGAWNEK--FDESMTKEFDHFL  
FvSRP-4 ----DL-LP-----YETVTC-----ATRILANALYFKGAWDQK--FIESRTNMFDFHL  
FvSRP-13 ----SI-LP-----PDSVST-----ETSLILANALYFKGWDWKE--FDASGTRVHDFHL  
FvSRP-5 ----SI-LP-----PDSVST-----ATRLILANALYFKGEWDRE--FEASDTRVSDFHL  
FvSRP-8 ----SI-LP-----FGSVSS-----ATRVLANALYFKGEWDKE--FDASYTRVRNFHL  
AtSRP-2 ----QI-LS-----RDCTDTIKEIRNSTLILANAVYFKAASR K--FDAKLTKDNDFHL  
AtSRP-3 ----QI-LS-----RDSIDT-----IRSSTLVLANAVYFKGAWSSK--FDANMTKKNDFHL  
AtSRP-8 ----EI-LS-----DDSIKT-----IRESMLILANAVYFKGAWSKK--FDAKLTKS YDFHL  
SbSRP-16 ----EL-LP-----PGSVDE-----STRVLGNALYFKGAWTNK--FDASETRDGEFHL  
OsSRP-6b ----NI-AT-----PR SINH-----NTKLVLANALYFKGAWAEK--FDVSKTEDGEFHL  
OsSRP-5 ----EI-LP-----PGSVDH-----TTRLVLGNALYFKGAWTEK--FDASKTKDGEFRL  
OsSRP-6a ----EI-LP-----PGSVDH-----TTRLVLGNALYFKGAWTEK--FDASKTKDGEFHL  
SbSRP-2 ----EL-LP-----PGSVDQ-----TTRLVLGNALYFKGAWTEK--FNVSETRDSEFHL  
SbSRP-3 ----EI-LP-----PGSVDH-----TTRLVLGNALYFKGAWTEK--FDASKTKDSEFHL  
AtSRP-5 ----EV-LP-----EGSADS-----MTKLIFANALYFKGTWNEK--FDESLTQEGEFHL  
FvSRP-3 ----EV-LP-----VGSVDA-----STRLVFANALYFKGAWSEK--FEASF TKE SDFHL  
MtSRP-11 ----DV-LS-----CGSIDS-----LTRLIFANALYFKGAWHQP--FDASETKDYDFHL  
MtSRP-9 ----DV-LS-----PGSIDS-----LTGLIFANALYFNGAWHQP--FDASKTKDHD FHL  
MtSRP-6 ----NL-LQ-----PGSVHS-----LTSLIFANALYFKGVWKP--FDTSKTKDYDFDL  
MtSRP-16 ----DL-LP-----RGSVDS-----LTSLIFANALYFKGVWKP--FDTSKTKDYDFDL  
MtSRP-3 ---------C-----LTNFI FANALYFKGVWLQE--VDTSKTKDYDFNL  
MtSRP-4 ----DL-LP-----PDSVDS-----LTNLI FANALYFKGAWSEE--FDTSKTKDYDFNL  
MtSRP-10 ----NL-LP-----PGSVND-----LTVLIGANALYFKGAWEEQ--FDISYTEDNDFHI  
MtSRP-12 ----NL-LP-----PGSVDD-----LVVLIGANALYFKGTWEEQ--FDIEDTEDYVFHV  
MtSRP-1 ---------MYFKGIWNEK--FDTSVTKDSDCYL  
MtSRP-13 ----QI-----HNIKTKDYDFHL  
MtSRP-14 ----EL-LP-----LRSVDR-----LTRLIFANALYFKGAWSDK--FDVSKTKDYDFHL  
MtSRP-5 ----EL-LP-----LGSVDY-----FTQLIFANALYFKGEWNDN--FDASETNVYDFHL  
MtSRP-2 ----QL-LP-----SRSVNS-----LTRLILANALYFKGVWNDK--FDASKTKDYDFHL  
MtSRP-7 ----EL-LP-----LGSVNN-----ATRLIFANALYFKGAWNDK--FDASKTEDYEFHL  
MtSRP-15 ----EI-LP-----QGSINN-----LSRLVFANALYFKGWSNQK--IDASTKDYDFYL  
SbSRP-12 ----SI-IS-----TG DIDA-----NTDLVLANAVYFKGAWLEP--FNPYATNWGTFHR  
SbSRP-1 ----DV-LS-----PGSVDA-----ETGLMLVNAIYFKGKWRVP--FDERCTEVEDFYL  
SbSRP-9 ----SI-LD-----PSSVDT-----LTTLVLCSAIYFKGRWEAP--FAKAHTVVDKFHR  
OsSRP-10 ----TI-LP-----PGSVST-----DTGLVVTSAIYFNGQWTP--FCKEITEKRAFHR  
OsSRP-8 ----TI-LP-----PGSVST-----DTGLVVTSAIYFNGTQWTP--FRKQDTKKDKFHL  
OsSRP-12 ----TI-LP-----PGSVST-----DTRLVVASAIYFNATWQTP--FRKQDTKKDKFHI  
SbSRP-15 ----SI-LP-----QGSVSS-----DTALVLNAIYFKGKWSVP--FPKKTDEIRRFQR  
OsSRP-9 ----EI-LP-----DGSVHV-----DTALVLVNAIYFKGKWSNP--FPRSSTTTGKFHR  
OsSRP-11 ----EI-LP-----DGSVHG-----GTALVLVNAIYFKGKWSNP--FPRERTTTGKFHR  
OsSRP-15 ----DV-LP-----PRSVGP-----ETAVVLGNALYFKGKWD RP--FNESDTERKPFYR  
SbSRP-10 ----QVFIN-----PEDDDN-----DDTVHVIANNAIYFKGEWRNP--FKKENTVDREFHR  
OsSRP-13 ----EV-IK-----PESQSV-----DTRHVGNAIYFKGEWLAP--FDKSDTAEREFRR  
SbSRP-13 ----NL-LS-----DGA VHG-----DTKVVLANGMHFKATWARR--FDPSNTVRDNFYR  
SbSRP-14 ----NL-LS-----DGA VHG-----DTKVVLANGMHFKATWARR--FDPSDTPVPHYFYR  
OsSRP-1 ----ERHAL-----QGEVGS-----DVRVV-----EHHAGNVPPPPR  
OsSRP-2 ----NT-IS-----PGTFGS-----STKCVLANAMHF KATWGRK--FESYDTPRRR FHR  
SbSRP-5 ----AV-LP-----PGSVGP-----STVAVLANALYFKGSAWQP--FDTSRTFDAPFHL  
SbSRP-6 ----DV-LP-----PGSVNS-----STVLVLNAIYFKGTWARR--FDRSRTFAAPFHL  
OsSRP-4 ----DV-LP-----PNSVDS-----STVVLANAVHF KGTWSLP--FHPSATFHAPFHL

CrSRP-1 --TGAKA-----TKEVFFMCKN-FEAQDRITAVRKE---GL-----YDAVAL-  
VcSRP-1 H-SG-QP-----KMPVMM-----HQLFD-----GPAKTLKGRKEGLYDAISL-



SbSRP-11 L-DG-TC-----VE-VPFVEYD-RTRPF--AVHD-----G-----FKVIKL-  
 OsSRP-14 L-DG-TS-----VE-VPFV-EY-DRTRL-FAVHD-----N-----FKVIKL-  
 SmSRP-1 P-SG-KT-----KE-VLMM-RS-SKKHF-IKNHG-----S-----FKVLRL-  
 PpSRP-1 A-DG-TT-----IQ-VPMM-RS-HKNQF-FKSFP-----T-----HKVRL-  
 PpSRP-2 L-DG-KT-----IK-VSMM-HT-SQRQY-VKSFP-----T-----FKALRL-  
 PpSRP-3 L-DG-KS-----IK-VPMM-HT-TKKQY-VKDFS-----T-----FKALRL-  
 PpSRP-4 L-DG-KS-----IQ-VPML-HT-TKKQY-VKDFS-----T-----FKVLRL-  
 SbSRP-8 V-DD-ASRDHAVR-VPFMSGFRHRFMQIGVHNAAGGGG-----FKVLRM-  
 SbSRP-4 S-PD-HA-----VR-APFMTGNHLHTQMRIGCHP-----G-----FNVLRM-  
 OsSRP-7 S-PD-HD-----VR-VPFMAGSHQHAFMDVGCHP-----G-----FNVLRM-  
 MtSRP-8 S-DG-SS-----VRNIPFM-VS-DETQY-IKSFDF-----G-----FKTLRL-  
 SbSRP-7 H-DG-GV-----VR-VPFM-SS-TSKQC-IACRP-----G-----YKVLRL-  
 OsSRP-3 P-DG-GH-----VS-APFM-SS-GKWQY-IACRA-----G-----YKVLRL-  
 AtSRP-4 L-DG-TK-----VR-VPFM-TG-ASCRY-THVYE-----G-----FKVINL-  
 AtSRP-7 V-NG-TS-----VS-VPFM-SS-YENQY-VRAYD-----G-----FKVLRL-  
 AtSRP-1 L-NG-KS-----VS-VPFM-RS-YEKQF-IEAYD-----G-----FKVLRL-  
 AtSRP-6 L-NG-TS-----VS-VPFM-SS-FEKQY-IAAYD-----G-----FKVLRL-  
 FvSRP-12 L-NG-GS-----VEAVPFM-RG-YGCWY-IGVFE-----G-----FKVLKL-  
 FvSRP-7 L-DG-SS-----VEGVLYM-RG-GDYQY-ICAFE-----G-----FKVLKL-  
 FvSRP-11 L-DG-SS-----VKGVPFM-RD-GGYQS-ICAFE-----G-----FKVLKL-  
 FvSRP-2 L-NG-DS-----VKGVPYM-TS-RHEHY-IAVFD-----D-----YKVLRL-  
 FvSRP-1 L-NG-DS-----VKGVPFM-SS-SHEHS-IAVFD-----D-----FKVLRL-  
 FvSRP-10 L-NG-ED-----CA-----LEDFD-----NG-----  
 FvSRP-9 L-NG-GS-----VKGVPFM-TS-EDCHS-IGAFD-----G-----FKVLRL-  
 FvSRP-14 M-NG-DS-----VMKVPFM-TS-NDCHY-IGAFD-----G-----FKVLRL-  
 FvSRP-6 Q-GG-SS-----VK-APFM-TS-SRYQF-ISVFD-----S-----FKVLKL-  
 FvSRP-4 L-SG-KS-----VK-APFM-TS-WKDQF-ISVFD-----S-----FKVLKL-  
 FvSRP-13 L-RSD-AS-----VK-APFM-TK-SSDQY-VSEFE-----T-----FKVLM-  
 FvSRP-5 LHNV-GS-----VK-AHFM-TK-WSDQF-VRAFE-----S-----FKVLKL-  
 FvSRP-8 L-DNAGS-----VK-AHFM-TK-WLYQY-VSEFE-----T-----FKVLKL-  
 AtSRP-2 L-DG-NT-----VK-VPFM-MS-YKDQY-LRGYD-----G-----FQVLRL-  
 AtSRP-3 L-DG-TS-----VK-VPFM-TN-YEDQY-LRSYD-----G-----FKVLRL-  
 AtSRP-8 L-DG-TM-----VK-VPFM-TN-YKKQY-LEYYD-----G-----FKVLRL-  
 SbSRP-16 L-NG-TS-----VG-APFM-SS-RDDQY-MASYG-----D-----LKVLR-  
 OsSRP-6b L-DG-ES-----VQ-APFM-ST-RKKQY-LSSYD-----S-----LKVLR-  
 OsSRP-5 L-DG-KS-----VL-APFM-ST-SKKQY-LSSYD-----S-----LKVLR-  
 OsSRP-6a L-DG-KS-----VQ-APFM-ST-SKKQY-ILSYD-----N-----LKVLR-  
 SbSRP-2 L-DG-TS-----VQ-APFM-SS-GKDQC-IACYD-----D-----FKVLKL-  
 SbSRP-3 L-DG-SS-----VQ-APFM-SS-TKKQY-IVSYN-----N-----LKVLR-  
 AtSRP-5 L-DG-NK-----VT-APFM-TS-KKKQY-VSAYD-----G-----FKVLGL-  
 FvSRP-3 L-DG-SK-----VQ-APFM-TS-KRKQF-LSAYD-----G-----FKVLGL-  
 MtSRP-11 L-DG-SS-----FK-VPFK-TS-RESQF-ISVFD-----G-----FKVLRL-  
 MtSRP-9 L-GG-SS-----IK-VPFM-TS-KKKQF-INAFD-----G-----FKILRL-  
 MtSRP-6 L-NG-KS-----VK-VPFM-TS-KNDQF-ISSF-----G-----FKVLGL-  
 MtSRP-16 L-NG-KS-----VK-VPFM-TS-KNNQF-ISSF-----G-----FKVLGL-  
 MtSRP-3 L-NG-SS-----VK-VPFM-----TILRL-  
 MtSRP-4 L-NG-SQ-----VK-VPFM-TS-MKRQF-ISVFD-----G-----FKVLRL-  
 MtSRP-10 Q-NC-NS-----VK-VPFM-TS-CEEQF-IGVFD-----D-----FKILRL-  
 MtSRP-12 Q-NG-NS-----ILHL-  
 MtSRP-1 L-NG-SS-----VK-VPFM-TS-YKKRY-IGDF-----G-----YKVLRL-  
 MtSRP-13 L-NG-SS-----VK-VPFM-TS-NKKQF-IEYD-----D-----FKVLRL-  
 MtSRP-14 L-NG-----F-IEAYD-----FKVLRL-  
 MtSRP-5 L-NG-NS-----VK-VDFM-TSDEKKQF-IRDF-----D-----FKVLGL-  
 MtSRP-2 L-NG-SS-----IK-VPFM-TS-KEEQY-IRAF-----D-----FKVLGL-  
 MtSRP-7 L-NG-SP-----VK-VPFM-TS-KKKQF-IRAF-----G-----FKVLGL-  
 MtSRP-15 L-NG-SS-----VK-VSFM-TS-KKKQF-IRAF-----G-----FKVLGL-  
 SbSRP-12 L-DG-GL-----AE-AEFMRSGIWSLD--VACMD-----G-----FKVLKL-  
 SbSRP-1 L-DG-TA-----VQ-TPLM-RG--RGSYLVAVHG-----G-----FKVLKL-  
 SbSRP-9 L-DG-ST-----AD-VPFM-SS-VRSQY-IAIRK-----G-----YKLLKL-  
 OsSRP-10 L-DG-GD-----VE-ADFM-RS-GEDQY-IAVHD-----G-----FKVLKM-  
 OsSRP-8 L-DGHGT-----VD-ADFM-RT-GEDQY-IAAHD-----G-----FKVLKM-  
 OsSRP-12 LGGG-GD-----VD-ADFM-RS-GDDQY-VAAYD-----G-----FKVLKM-  
 SbSRP-15 L-DG-SH-----VL-TPFM-RS-RKDHA-VAVFD-----G-----FKVLKL-  
 OsSRP-9 L-DG-SS-----VD-VPFM-SS-REDQY-IGFHD-----G-----FTVLKL-  
 OsSRP-11 L-DG-SS-----VD-APFM-SS-REDQY-IGFYD-----G-----FKVLKL-  
 OsSRP-15 H-DG-AAAAA-VAD-VPYM-SS-RSYQR-VAVHD-----G-----FKVLKL-  
 SbSRP-10 L-DG-SS-----VE-VPFL-QS-WSYQC-IACHS-----G-----FKVLKL-  
 OsSRP-13 L-DG-SS-----VE-VPFMQRPSGSYHH-VACHD-----G-----FRVLRL-  
 SbSRP-13 R-NG-EP-----VR-VPFL-SD-AGMHY-AESFDAPGL-G-----FKVLQC-  
 SbSRP-14 R-DG-EP-----VW-VPFL-SD-AGMHY-AESFDAPGL-E-----FKVLR-  
 OsSRP-1 H-DGAGA-----VPVGPRLALRRQGAKFEFHGLE-----FKVLQL-  
 OsSRP-2 Q-DG-TR-----VT-VPFL-SD-PRTHY-AARFDGL-----G-----FKVLQL-  
 SbSRP-5 P-GG-AT-----VR-APFM-TSSRFQHYVAVFP-----G-----FRALKL-  
 SbSRP-6 P-GG-AT-----VR-APFM-TSPLSEDDQVAVFP-----G-----FKALKL-  
 OsSRP-4 L-DG-GA-----VR-APFM-TTEIPFERH-VAAFP-----G-----FTALKL-

CrSRP-1 --PYKGD-----AFSAI--ALLPA  
 VcSRP-1 --PYK-----GDVFSAV--ALLPA  
 SbSRP-11 --PYQQG-----K-----NERKFSMY--IFLPD  
 OsSRP-14 --PYQQG-----K-----NERKFSMY--IFLPD  
 SmSRP-1 --PYQRG-----D-----DPRSFSMY--VLLPA  
 PpSRP-1 --PYALK-----ET-----TQRSFAMF--ILLPO

PpSRP-2 --PYSAG----H-----DERLFSMF--ILLPS  
PpSRP-3 --PYSSG----H-----DRRSFSMF--ILLPH  
PpSRP-4 --PYSAG----S-----DRRSFSMF--ILLPH  
SbSRP-8 --PYRGD----GG-----GGTEFAMY--IYLPD  
SbSRP-4 --SY-----TDRNFAMY--IYLPD  
OsSRP-7 --MYRTG----GAAG-----GDKMFAMY--IYLPD  
MtSRP-8 --AYKKG----NG-----DDKHYQFYLDIFLPN  
SbSRP-7 --RYAQH----GGG-----EQRLLSMY--IYLPD  
OsSRP-3 --PYARGGRGRGRD-----TGRLFSMY--IYLPD  
AtSRP-4 --QYRRG----RE-----DSRSFSMQ--IYLPD  
AtSRP-7 --PYQRG----SDD-----TNRKFSMY--FYLPD  
AtSRP-1 --PYRQG----RDD-----TNREFSMY--LYLPD  
AtSRP-6 --PYRQG----RDN-----TNRNFAMY--IYLPD  
FvSRP-12 --AYRNQ----GV-----HPRCFSMY--FYLPD  
FvSRP-7 --PYRNL----GV-----SPWSFFMY--FCLPD  
FvSRP-11 --PYRNL----GV-----SPRCFSMY--FCLPD  
FvSRP-2 --RYRKC----ALEDFDNGTYKF-----DPRSFSML--WLLPD  
FvSRP-1 --QYSNC----ALEDSDNGTDKY-----DPRSFSML--WLLPD  
FvSRP-10 --TYKH-----DPRSFSML--WLLPD  
FvSRP-9 --PFNNY----DYDDLQIGLVNYTTPGRIQTSKDWSHRGTRKYDDPRQFSMF--MLLPD  
FvSRP-14 SRKYEDGELFEDLSHLRSRTGNRKYD-----DYRKFSIF--WLLPD  
FvSRP-6 --PYKHG----ED-----YDRRFCMC--VFLPN  
FvSRP-4 --PYKQG----ED-----HNRFFSMY--MFLPN  
FvSRP-13 --PYKQG----KD-----YERRFSMY--IFLPN  
FvSRP-5 --LYKQG----QD-----YEREFAMY--IFLPN  
FvSRP-8 --PYKQG----KD-----YEREFAMY--IFLPN  
AtSRP-2 --PYVE-----DKRHFSMY--IYLPN  
AtSRP-3 --PYIE-----DQRQFSMY--IYLPN  
AtSRP-8 --PYVE-----DQRQFAMY--IYLPN  
SbSRP-16 --PYEQG----G-----DKRQFSMY--ILLPE  
OsSRP-6b --PYLQG----G-----DKRQFSMY--ILLPE  
OsSRP-5 --PYQKG----R-----DLRQFSMY--ILLPE  
OsSRP-6a --PYQQG----G-----DKRQFSMY--ILLPE  
SbSRP-2 --AYQQG----G-----DKRKFSMY--ILLPE  
SbSRP-3 --PYQQG----G-----DKRQFSMY--ILLPD  
AtSRP-5 --PYLQG----Q-----DKRQFSMY--FYLPD  
FvSRP-3 --PYRQG----E-----DKRRFSMH--IYLPD  
MtSRP-11 --PYEHG----TI-----DDRHFAMY--FLLPD  
MtSRP-9 --PYKQG----N-----DIRQFSMY--FFLPD  
MtSRP-6 --PYKQG----N-----YGRAFSY--FFLPD  
MtSRP-16 --PYKQG----N-----DKRAFSY--FFLPD  
MtSRP-3 --FYKHD----AFRQS-----DKRYFSMY--FFLPD  
MtSRP-4 --FYKHEYSYKQS-----DKRYFSY--FFLPD  
MtSRP-10 --PFEQG----G-----GKRRFSFY--LFLPD  
MtSRP-12 --PFEQG----G-----GKRRFSFY--LFLPD  
MtSRP-1 --PYNQG----K-----DECQFSMY--IFLPD  
MtSRP-13 --PYKKG----E-----DKRQFSMY--FFLPN  
MtSRP-14 --PYKKG----K-----DKRPFSMY--IFLPN  
MtSRP-5 --PYKQG----E-----DKRQFTMY--FFLPN  
MtSRP-2 --PYKQG----E-----DKREFTMY--FFLPN  
MtSRP-7 --PYKQG----E-----DKRQFTMY--FFLPN  
MtSRP-15 --PYKQG----E-----DKRRFTMY--FFLPN  
SbSRP-12 --PYERGAAGTGSCQLKRRRGQVAGKSKATAPSTEAN-----EGTQYSML--FFLPD  
SbSRP-1 --PYQAPLAFPRFGGMRMAKVARRG-----VGAMYSLC--VFLPD  
SbSRP-9 --PYRSPAAPAPAPRRKATPSESNRPTGDGGDDDDDD-----PAPKYSMC--IFLPD  
OsSRP-10 --PYAACVSARTT-----TTPRYSMY--VFLPD  
OsSRP-8 --PYAHDHAAPQP-----SPRYYSY--ILLPD  
OsSRP-12 --PYNTR----ASRTH-----TQPQYSLC--VFLPD  
SbSRP-15 --AYETHRRKADRHLSSGRNSKQDGHNSD-----EHPRFSMC--VFLPD  
OsSRP-9 --PYHRTMKNHGDGDTITNSSITRAILEHYGG-----ENVGLSMY--IFLPD  
OsSRP-11 --PYHRT----MKNHGDGDDITPAILKHYG-----ENVGLSMY--IFLPD  
OsSRP-15 --RYRSPRLLRDKRKRGGGGDVGG-----EFTRYAMA--IFLPD  
SbSRP-10 --PYELMNESNWKLYD-----SLPRFSMC--VFLPD  
OsSRP-13 --PYKAT----SDTYNLKRLY-----SLPSFAML--VFLPD  
SbSRP-13 --FYKMV----GRDGKLDL-----KAPCFCML--IFLPH  
SbSRP-14 --FYKMV----GRDGRLDS-----RAPCFCML--IFLPH  
OsSRP-1 --FYKMV----GRDGQVDFGF-----GAPCFCML--VFLPI  
OsSRP-2 --FYKMV----GHDGQVHF-----GAPCFCML--VFLPI  
SbSRP-5 --PYSCKSGDQWH-----QAAYFYML--LLLPD  
SbSRP-6 --PYKND----G-----GAAWFYML--LLLPD  
OsSRP-4 --PYKNV----GGGGGGDV-----PRAAFYML--LLLPD

;

\*

CrSRP-1 VGVA---MEAAKDWGS-----GP-----Q-ELRPVKGKCFVKLPKFKV  
VcSRP-1 VGVD---MATAFEDWAR-----GPQEF-----Q-----IRRVKIVMPKFKV  
SbSRP-11 AHDG---LFELTKKIFA-----EP-SFLEHH--LP-----TEKRHVDIRV--PKFTV  
OsSRP-14 DHDG---LFELTQKIFS-----EP-MFLEQH--LP-----T-EKCHVG-ISV--PNFKI  
SmSRP-1 ELQG---LPALVSSLH-----DA-ESMGNA--LA-----GIHEVEVGFQ--PKFKI  
PpSRP-1 ENIT---LLEDLESSL-----TPQSLTSDL--TN-----FGNKVPLKRFLL--PKFKV  
PpSRP-2 EKYG---LVELEKALDA-----KTLAEDLQH--VK-----QLLVPVKFEL--PKFKI  
PpSRP-3 EKNG---ITEFEKSL-D-----FK-TLAEDLSKVN-----QEAPMNQFAL--PKFKI  
PpSRP-4 EKDG---ITELEKSLDL-----KILAEDLRTV-----N-QEVPVTEFAL--PKFKI  
SbSRP-8 DRDG---LPALLRALSA-----SP-DTLLGRSVVP-----EPAVKVVGELKI--PKFEV

SbSRP-4 ELDG---LPGLVRQIGS-----DPAFLRKT-IVP-----E-KPVTVGKLR I--PRFLV  
OsSRP-7 DRDG---LPELARKLAS-----NPAFLRRT-IVP-----A-QPVAVGELKI--PKFEV  
MtSRP-8 PGFD---LPTMLQSMMA-----NNFDLIMSR--LV-----Q-DKVRVGEFRI--PKFKI  
SbSRP-7 AHDG---LPALLHKLSA-----DPAAPLESSR TLT-----SEVPVRAF RV--PRFTV  
OsSRP-3 ERHG---LPDMLRKLCS-----DPAALIESSAALT-----EKVPVGAFMV--PRFTL  
AtSRP-4 EKDG---LPSMLERLAS-----TR-GFLKDNEVLP-----S-HSAVIKELKI--PRFKF  
AtSRP-7 KKD G---LDDLLEKMAS-----TP-GFLDSH--IP-----T-YRDELEKFR I--PKFKI  
AtSRP-1 KKGE---LDNLLERITS-----NP-GFLDSH--IP-----E-YRVDVGD FRI--PKFKI  
AtSRP-6 KKGE---LDDLLEMTS-----TP-GFLDSH--NP-----E-RRVKVGKFR I--PKFKI  
FvSRP-12 ARDG---LPALVEKVC S-----GS-GFLDSH--VP-----H-SKLRVGM LI--PKFKI  
FvSRP-7 ARDG---LPTLLEKMAS-----EP-RFLEGC--VP-----D-EELYVGKMLV--PKFKI  
FvSRP-11 ARDG---LPALVEDFCS-----GS-EFLEGC--IP-----D-EELYVGEM LI--PKFKI  
FvSRP-2 ARDG---LPALAEVCS-----KP-GFFDRH--LN--CESF-TSVKVKKFLI--PKFKI  
FvSRP-1 ARDG---LPALAEVCS-----ES-RFFDRH--LN--FESF-TSVKVKKFLI--PKFKM  
FvSRP-10 ARDG---LPALAEVCS-----ES-GFLDRH--LNLKFESF-TWVRVKKFLI--PKFKI  
FvSRP-9 ARDG---LPALVERVCS-----ES-EFLDRH--TR-----T-RSARVKGFFI--PKFKM  
FvSRP-14 ARDG---LPALVERVCT-----ES-GFLDRH--TD-----L-RYVRVGEFLI--PKFKM  
FvSRP-6 ETDG---LQALVERVCS-----ES--IDGY--IP-----R-TSPVVGKFLI--PKFKI  
FvSRP-4 ASNG---LPSLVEFCS-----EA-GFLDRY--LP-----C-RKVEVDKFLI--PKFKI  
FvSRP-13 ARKG---LRALVKKFCS-----DF-EFMDRH--LP-----D-ERVVDEFLLI--PKFKI  
FvSRP-5 TRNG---LPSLIEQFCS-----NV-EFIDSH--LP-----N-ERVVRRFLI--PKFKI  
FvSRP-8 ARNG---LRALLEQFCS-----NV-KFIDSH--LP-----D-HKVPVGRFLI--PKFKI  
AtSRP-2 DKDG---LAALLEKIST-----EP-GFLDSH--IP-----L-HRTPVDALRI--PKLNF  
AtSRP-3 DKEG---LAPLLEKIGS-----EP-SFFDNH--IP-----L-HCISVGA FRI--PKFKF  
AtSRP-8 DRDG---LPTLLEEISS-----KP-RFLDNH--IP-----R-QRILTEAFKI--PKFKF  
SbSRP-16 AQDG---LWSLAEKLS S-----EP-EFLDRH--IP-----T-RKIPVQIKV--PKFKI  
OsSRP-6b AQDG---LWSLAEKLS S-----EP-EFMENH--IP-----M-RPVHVGQFKL--PKFKI  
OsSRP-5 AQDG---LWSLAEKLS S-----EP-EFLEKR--IP-----T-RQVTVGKFKL--PKFKI  
OsSRP-6a AQDG---LWSLAEKLS S-----EP-EFLEKH--IP-----T-RQVTVGQFKL--PKFKI  
SbSRP-2 ARDG---LWSLAEKLS S-----EP-EFMEEH--IP-----T-RKVPVQGFV--PKFKV  
SbSRP-3 AKDG---IWSLSEKLS S-----EP-EFLDKY--IP-----M-QKVPVQGFV--PKFKI  
AtSRP-5 ANNG---LSDLLDKIVS-----TP-GFLDNH--IP-----R-RQVKVREFKI--PKFKF  
FvSRP-3 AKDG---LPALVEKVG T-----GS-GFLQRH--LP-----Y-EQVSVSDFKL--PKFKI  
MtSRP-11 AKDG---LSALIEKVAS-----EY-ETLEHI--LP-----D-SIVDVGD FRI--PSFEI  
MtSRP-9 AQDG---LLALIEKVAS-----KP-EILKHK--LP-----R-KEVIVGD FRI--PRFKI  
MtSRP-6 AKDG---LSALIDNVTS-----DY-EFLEHN--LP-----R-RKVEVGKFR I--PRFNI  
MtSRP-16 EKDG---LSALIDKVAS-----DS-EFLEQK--LP-----R-NQVKVGKFM I--PRFNI  
MtSRP-3 AKDG---LLALTEKVAS-----ES-EFLERT--CP-----K-QTVRVGD FRI--PRFKI  
MtSRP-4 AKDG---LLALTEKVAS-----ES-EFLEHT--RP-----R-ETVIVGD LRI--PKFNI  
MtSRP-10 AEDG---LDDLIEKLS S-----EF-EFLQHK--LP-----S-RKVKVGTFR I--PRLNI  
MtSRP-12 AEDG---LDDLIEKLS S-----EF-EYLQHK--LP-----S-RKVKVGA FRI--PRFNI  
MtSRP-1 AKDG---LSTLVEKLS S-----EF-ELPEHN--LP-----LIKKVAVGEFKI--PRFNI  
MtSRP-13 AKDG---LTSALVEKVS S-----TS-EFLHRS--LC-----L-SQKELGNFKI--PKFNI  
MtSRP-14 AKDG---LSTLVKKVAS-----ES-ELLHHRFHLP-----E-EVEGFRI--PRFKI  
MtSRP-5 AKDG---LPTLLEKLS S-----ES-ELLQHK--LP-----L-DKVEVGD FRI--PRFNI  
MtSRP-2 AKDG---LPTLLEKLS S-----ES-ESLKHK--LP-----Y-DRVEVGD FRI--PRFNI  
MtSRP-7 AKDG---LAALVEKVAS-----ES-ELLQHK--LP-----F-GKVEVGD FRI--PKFNI  
MtSRP-15 AKDG---LPSLVEKVAS-----ES-DLLQHK--LP-----F-DKVEVGD FRI--PKFNI  
SbSRP-12 ARDG---LSTMVDLVTA-----SP-SFLYGI--LA-----EMKERPV--VMEL--PKFAI  
SbSRP-1 ARDG---LWSLVDELA A-----SGPAFLHDH--LP-----W-SKVCVHKLRL--PRFKM  
SbSRP-9 ERDG---LPGLVEKIAS-----GA-GFWHYR--LP-----T-SQVPVGA FRL--PKFKV  
OsSRP-10 ERDG---LWSLEDRMA A-----GGEGFLREH--TP-----E-RRVEVGEFRI--PRFKL  
OsSRP-8 ERDG---LSSLEDRMAAAGGGGGGE-GFLSEH--MP-----V-RRVEVGEFRI--PRFKL  
OsSRP-12 KRNG---LWTLADRMEA-----GGEVFLREH--MP-----E-KRVKVG E FRI--PRFKL  
SbSRP-15 AHDG---LQNLMDMVAS-----HP-SFLWDH--MP-----R-RRVKVGE LRL--PKFKL  
OsSRP-9 ERDG---LPALVDKMA A-----SSSSSFLRDH--RP-----T-RRREVGD LRV--PRFKV  
OsSRP-11 ARDG---LPALVDKMAVASSGTASS-SFLRDH--RP-----GRRRIKVG DLRV--PRFKV  
OsSRP-15 ARDG---LRGLVERMAS-----RP-GFLHEH--MP-----AAMPVVG EFRV--PKFKV  
SbSRP-10 GKKG---LRDIMEKIAS-----SLPAFLHDH--LP-----K-EYVPIGQFRL--PKFKL  
OsSRP-13 DRDG---LPGLLDRITA-----SP-EFVDEH--LP-----P-GCVPVGRFRV--PKFKL  
SbSRP-13 RDDG---LRDLLRLAVT-----EP-DFVMRC--AP-----R-REQAVCPCKV--PKFKF  
SbSRP-14 SDDG---LDDLRLAVT-----EP-DFVMRC--AP-----R-REQEVCPCKV--PKFKF  
OsSRP-1 KRDG---LRHLLRMAVT-----EP-DFVTRC--VP-----R-SRQIVTPCKV--PKFKF  
OsSRP-2 KRDG---LRHLLRMAVT-----EP-DFVMRC--VP-----R-SEQEVSPCMV--PKFKF  
SbSRP-5 DDHG---LGDVYDKAVS-----TP-GFIRKH--TP-----V-GKVPVGR L MV--PKFKF  
SbSRP-6 GEALT---LSDLYDKAVS-----TP-GFIRRH--TP-----V-DGVVRRFMV--PKFKF  
OsSRP-4 G-DGALKLADLYDMAVT-----TP-EFIKKH--TP-----A-AEAPVRR L MV--PKFKF

: \* : .

CrSRP-1 ES-QLSLK-TVLH-KLGVKQAFGG S-----AD-FSRL--S--DT-----  
VcSRP-1 SS-QLSLK-PVLK-EMGVEVAFTVA-----AD-FTRM--A--DG-----  
SbSRP-11 SF-QVDMK-EFLK-EMGLEPFLRD-----AD-FTDM--VKEDES-----RS-  
OsSRP-14 SF-QIDVK-DFLK-DMGLELPLFRE-----AE-FSDM--IKEDDS-----SG-  
SmSRP-1 SL-GVQAP-ELLK-RMGLDLAFSPPH-----AD-FSGM--V--EGS-----P--GD-  
PpSRP-1 TY-GLEVS-EPLK-AMGMELPFTPE-----GD-FSDM--TSDDG-----  
PpSRP-2 SS-QFEVP-KALE-SMGLTLPFGRE-----AD-LTEM--L--DSPV-----SD-  
PpSRP-3 SF-SFEVP-EALQ-TLGLSLPFGEE-----AD-LTEM--V--DSSL-----AD-  
PpSRP-4 SH-GFEAP-EALK-SLGLSLPFGEE-----AD-LTDM--V--DSPT-----AD-  
SbSRP-8 SL-RVEAS-QMLQ-SLGLDLRSS-----GDSFSEM--LSPPAP-----  
SbSRP-4 SL-KVEAS-RLLR-DLGLDLFPDPAM-----AD-FSAM--L--MPDS-----PQ-  
OsSRP-7 SL-KVEAS-RLLR-EFGLDLPLPAA-----DNSFSGM--L--LDP-----PQ-  
MtSRP-8 LS-RLDDTLDVLK-ERGVSKAF EK-----GA-LKDI--L--QHDA-----A--GN-  
SbSRP-7 AY-RTNAR-EMLL-DLGLLLPFD R VA-----AD-FGDM--G--EEAG-----A--PE-

OsSRP-3 SY-KTNAA-ETLR-QLGLRPLFEYYPG----AD-LSEM---V--ESSP-----E---AE-  
 AtSRP-4 DF-AFEAS-EALK-FGLVLVPL-----  
 AtSRP-7 EF-GFSVT-SVLD-RLG-----LRSM-----  
 AtSRP-1 EF-GFEAS-SVFN-DFELNVSLH-----  
 AtSRP-6 EF-GFEAS-SAFS-DFELDVSF-----  
 FvSRP-12 SS-GFEAS-KVLA-GLGLVLPFVYDV--KGGN-VTEM---V--ESP-----A---GE-  
 FvSRP-7 SS-GFEAS-KVLK-ASGLVLPFSFDPVKNKGGN-VSEM---V--ESP-----S---GD-  
 FvSRP-11 SS-GFEAS-KVLK-TSGLVLPFIFDPV-KGGN-VTEM---V--ESP-----A---GE-  
 FvSRP-2 SS-RFEAA-GVLQ-KLGL-----GG-ACDS---M--V-----  
 FvSRP-1 SS-RFEAS-SVLQ-KLGL-----GD-GCDS-----  
 FvSRP-10 SS-GFEAS-DVLK-KIGM-----GD-GCDS---M--A-----  
 FvSRP-9 SS-RFEAS-GVLK-QMGLRCVLD-----  
 FvSRP-14 SS-RFEAS-GVLK-KMGL-----GD-VLDL---I--E-----  
 FvSRP-6 SA-EFDPL-PVLK-PLGFSFEN-----GH-LTEM---V--EG-----  
 FvSRP-4 TF-GIEVS-QVLE-TLGLKLPY-----LSET---VVGDEP-----  
 FvSRP-13 SC-DFEAS-KLLE-TLGFTP-----GG-LTEM---V--DS-----AE-  
 FvSRP-5 SC-GFEAS-KLLE-TLGFSP-----GG-LTEM---V--DSP-----E-  
 FvSRP-8 SC-GFEAS-KLLQ-TLGFSL-----GG-LTEM---V--DPP-----E-  
 AtSRP-2 SF-EFKAS-EVLK-DMGLTSPFTSK---GN-LTEM---V--DKSPS---N---GD-  
 AtSRP-3 SF-EFNAS-EVLK-DMGLTSPFNNG---GG-LTEM---V--DSPS---N---GD-  
 AtSRP-8 SF-EFKAS-DVLK-EMGLTLPFTH---GS-LTEM---V--ESPSIPENLCV---AE-  
 SbsRP-16 SF-GFEAS-ELLK-GLGIQLPFSSE---AD-LSEF---F--DSP-----V---PL-  
 OsSRP-6b SF-GFGAS-GLLK-GLGLPLPFGSE---VD-LIEM---V--DSP-----G---AQ-  
 OsSRP-5 SF-GFEAS-DLLK-ILGLQLPFSK---AD-LTGM---V--GSP-----E---RH-  
 OsSRP-6a SF-GFEAS-DLLK-SLGLHLPFSSE---AD-LTEM---V--DSP-----E---GK-  
 SbsRP-2 SF-GFEAS-DLLK-GLGLELPFSSQ---AD-LSEL---V--HLP-----A---GQ-  
 SbsRP-3 SF-GFEAS-KLLK-GLGLQLPFSAQ---AD-LSEL---V--DSP-----E---GQ-  
 AtSRP-5 SF-GFDAS-NVLK-GLGLTSPFSGE---EG-LTEM---V--ESPE-----M---GK-  
 FvSRP-3 SF-GFEAT-NLLK-GLGVVLPFSGE---GG-LTEM---V--DST-----V---GQ-  
 MtSRP-11 SF-GFELS-NMLK-ELGVILPFSN---GG-LTKI---V--DSP-----  
 MtSRP-9 YS-GLELS-NVSK-ELGVVLPFSG---GG-LTKM---A--DSP-----  
 MtSRP-6 SF-EIEAP-ELLK-KLGLTLPFSM---GG-LTKM---V--DSP-----I---SQ-  
 MtSRP-16 SF-EIEAS-ELLN-KLGLTLPFSK---GG-LTKM---V--DSP-----I---SQ-  
 MtSRP-3 SF-ELETS-NMLK-ELGMVLPFSQ---GG-LTKM---V--DSP-----T---SQ-  
 MtSRP-4 AF-GLETS-GVLK-ELGVVLPFST---GG-LTNM---V--DSP-----M---DQ-  
 MtSRP-10 SF-ELETS-SMLK-ELGVVLPFSDI---GG-VAKM---V--D-----NE-  
 MtSRP-12 SF-ELETS-SVLK-ELGVVLPFSDI---GG-VAKT---V--A-----GE-  
 MtSRP-1 SF-GIETT-NTMK-ELGVILPFS---GG-FTKI---V--DSSF-----E---GE-  
 MtSRP-13 SF-ELEAT-RMLK-KLGVVLPFSP---GG-FTKM---V--DSSL-----M---GK-  
 MtSRP-14 SF-ELETS-DMLK-ELGVTLPFTR---EG-LTKM---V--DSSL-----V---GD-  
 MtSRP-5 SF-ELETS-DMLK-ELGVVLPFTN---GG-LTKM---V--NSA-----V---SQ-  
 MtSRP-2 SF-GLETS-DMLK-ELGVVLPFTN---GG-LTKM---V--NS-----SQ-  
 MtSRP-7 SF-GLETS-DMLK-ELGVVLPFSG---GG-LTKM---V--NSS-----V---SQ-  
 MtSRP-15 SF-GLETS-DMLK-ELGVVLPFSG---EG-LTKM---V--DS-----NQ-  
 SbsRP-12 TF-SWGDLDGDLR-RLGLSLPFSPEA---AD-LRGM---CKGDDEV-----VDGAGAA  
 SbsRP-1 SF-HSDLT-DALR-EMGLEATLDPRDGD--TD-LTDM---A--ERK-----GYA-GE-  
 SbsRP-9 SA-SGSVR-EVLRDGMGIKSAFVAGE---AD-LADMAAKR--DDDE-----DAA  
 OsSRP-10 SF-DDSVV-GALQ-RLGVRDVFKPFV---AD-LADV---LEAENS-----GDD  
 OsSRP-8 SF-SRSVV-RALR-GVGVNAVDFDR-----AE-LPDM---I--E-----GE-  
 OsSRP-12 SF-DGSIK-TALQ-GVGVRAVDPAA---AD-LSDV---L--EEG-----NSG  
 SbsRP-15 SF-SSRIN-GVLE-DMGIKAAFGT---AD-LSEM---L-----EQR  
 OsSRP-9 SF-YSQIN-GVLQ-GMGLTAAFDAGE---AD-LSGMAEGV--DQR-----GG-  
 OsSRP-11 SF-YSEMNI-EVLK-GMGIKAAFVVGK---VD-LSGM---I--DGE-----  
 OsSRP-15 SC-GGSVV-GALE-QLGLRPLPFSPEL---AD-LSDM---VEDDGS-----GW-  
 SbsRP-10 SF-EREIQ-DDLI-HLGLLELPDFFF---AN-MGDLLHEE--D-----TR-  
 OsSRP-13 AFCHYGIA-DVLR-GLGLRPLPDMFA---AE-MSGIAVEG--DGE-----DA-  
 SbsRP-13 SF-TFNAV-TALW-QLGLSAPFAD---GADLSRM---VS-NMP-----RE-  
 SbsRP-14 SF-AFDAG-NALR-QLGLSEPFITYA---AD-LSGM---V--SSMP-----AE-  
 OsSRP-1 SS-QLDAG-GALA-QLGLGAPFDPDA---AD-LSRMA---V--NTP-----PA-  
 OsSRP-2 SS-ELDAR-GALA-KLGLGAPFDPLA---AD-LSRMAVSV--NTP-----PE-  
 SbsRP-5 TF-DFEAR-EEMQ-RLGVIRAFGG---GD-FSGM---F--AGG-----GG-  
 SbsRP-6 TF-EFEAS-GDIQ-KLGMVRAFEG---GD-FSGM---V--SG-----GN-  
 OsSRP-4 SF-KFEAK-SDMR-KLGVTRAFAG---GD-FSGM---V--TG-----GD-

CrSRP-1 --KMFVSDVVHKA-VVEVDE-----  
 VcSRP-1 --GLFISDVVHKA-VVEVDE-----  
 SbsRP-11 --PLYLSDILHKA-ILEVND-----  
 OsSRP-14 --PLFLSDVLHKA-VLEVVDQ-----  
 SmSRP-1 --DLFISDVVFHKA-FVEVNE-----  
 PpSRP-1 --PLGISSVRHKA-FVDVNE-----  
 PpSRP-2 --KLYVSNLYHKT-FVEVNE-----  
 PpSRP-3 --KLFVSNLYHKT-FVDVNE-----  
 PpSRP-4 --KLYVSNLYHKT-FVEVNE-----  
 SbsRP-8 --PVGLSSVVHQC-VVKVTE-----  
 SbsRP-4 --QVAVSAMLHQC-FVSVNE-----  
 OsSRP-7 --GTAVSLLHQC-FVNVNE-----  
 MtSRP-8 --KLLVSNIFHKS-FIEVNE-----  
 SbsRP-7 --PLVSDVYHES-FVEVNE-----  
 OsSRP-3 --KIVVSAVYHES-FVEVNE-----  
 AtSRP-4 -----SMIMHKS-CIEVDE-----  
 AtSRP-7 -----SMYHKA-CVEIDE-----  
 AtSRP-1 -----QKA-LIEIDE-----

AtSRP-6 -----YQKT-LIEIDE-----  
 FvSRP-12 --DPYVKAIFHKS-CIEIDE-----  
 FvSRP-7 --DPYVSAMFHKS-CIEIDE-----  
 FvSRP-11 --DPYVSAMFHKS-CIEIDE-----  
 FvSRP-2 -----IFHES-VIEVDE-----  
 FvSRP-1 -----IFHEC-VVEVDE-----  
 FvSRP-10 -----IFHES-VIDVDE-----  
 FvSRP-9 -----REIFHES-VIEVDE-----  
 FvSRP-14 -----IVHESAVIEVDE-----  
 FvSRP-6 --RAVALNMFQKS-FIEVNE-----  
 FvSRP-4 ---FVNLI IHKS-FIEVNE-----  
 FvSRP-13 --PLYASNIFHKA-FIEVNE-----  
 FvSRP-5 --PLYVSQIFHKA-FIEVNE-----  
 FvSRP-8 --PLHVSLIFHKA-FIEVNE-----  
 AtSRP-2 --KLVVSSIIHKA-CIEVDE-----  
 AtSRP-3 --DLVYSSILHKA-CIEVDE-----  
 AtSRP-8 --NLFVSNVPHKA-CIEVDE-----  
 SbSRP-16 --GLSVSSILHRS-FVEVNE-----  
 OsSRP-6b --NLFVSSVPHKS-FIEVNE-----  
 OsSRP-5 --NLFVSSLFHKS-FVQVDE-----  
 OsSRP-6a --NLFVSSVPHKS-FVEVNE-----  
 SbSRP-2 --NLCVSSIFHKS-FVEVNE-----  
 SbSRP-3 --NLSVSSVYHKS-FVEVNE-----  
 AtSRP-5 --NLCVSNIFHKA-CIEVNE-----  
 FvSRP-3 --NLYVSSIIYHKS-FIEVNE-----  
 MtSRP-11 ---LWISNITQKS-I IKVNE-----  
 MtSRP-9 ---I WVSNI FQNS-FIEVNE-----  
 MtSRP-6 --EIFVSDILQKS-CIEVNE-----  
 MtSRP-16 --ELSVTSIFQKS-FIELNEEGTIAAATARGSTGGAAPFRLPPPPPIDFVADHPFLFLIR  
 MtSRP-3 --NLYVSDVPHKS-FIEVNE-----  
 MtSRP-4 --NLHISNIFHKS-FIEVNE-----  
 MtSRP-10 --SLVVKIIFHKS-FIEVNE-----  
 MtSRP-12 --SLVVKIIFHKS-FIEVNE-----  
 MtSRP-1 --NLYVSNIFHKS-FIEVNE-----  
 MtSRP-13 --ILSVSNIFHKS-FIEVNE-----  
 MtSRP-14 --SLVVKIIFHKS-FIEVNE-----  
 MtSRP-5 --NLYVVKIIFHKS-FIEVNE-----  
 MtSRP-2 --NLCISKIIFHKS-FIDVNE-----  
 MtSRP-7 --NLCVSNIFHKS-FIEVNE-----  
 MtSRP-15 --KLFMSNILHKY-FIEVNE-----  
 SbSRP-12 RRPTFLSKVAHTA-VVKVNE-----  
 SbSRP-1 --SPKIDKVCHKA-VIELNE-----  
 SbSRP-9 RTPLCVSDVCHKA-VLEVNE-----  
 OsSRP-10 P-PLFVSDVKHKA-VIEVNE-----  
 OsSRP-8 --PLRVSDVLHKA-VIEVNE-----  
 OsSRP-12 DPPLFVSDVLHGA-AIEVNE-----  
 SbSRP-15 ENGLVLEHVPHKA-VIEVNE-----  
 OsSRP-9 --GLVVVEVPHRA-VVEVNE-----  
 OsSRP-11 --LVVVEKVMHRA-VVEVNE-----  
 OsSRP-15 --PLFVGDIQHKA-VIEVNE-----  
 SbSRP-10 --RMRVNRVIHKA-VIEMNE-----  
 OsSRP-13 --AMFVSSVIHKV-VVEVNE-----  
 SbSRP-13 --GIYVSAVRQTC-AVEVDE-----  
 SbSRP-14 --GLYVSAMRQTC-AVEVDE-----  
 OsSRP-1 --GLYVSTMRQKC-AVEVDE-----  
 OsSRP-2 --RLYVSAMRQKC-AVEVDE-----  
 SbSRP-5 --GAFVAGVYHKA-TVEVDE-----  
 SbSRP-6 --GLFISGVYHKA-TVEVDE-----  
 OsSRP-4 --GLFIAEVYHQA-TIEVDE-----  
  
 : : :

CrSRP-1 -----EGTVAAAAT-----AVMMLRCALP---MP---TPEFIFNR  
 VcSRP-1 -----EGTVAAAAT-----AVMMLRCVPA---P---PEEIIIFNR  
 SbSRP-11 -----NGIKDTSVT-----MGIGKPRP-----GEHFVADH  
 OsSRP-14 -----KGI EETSVS-----MGLGKPLP-----AQHFKADH  
 SmSRP-1 -----EGTEAAAAS---AA-VVTLRALNVQ---ME---PEDFVADH  
 PpSRP-1 -----VGTEAAAVT---TV-EISLMSMIMY---TRE---PDTFVADR  
 PpSRP-2 -----KGTEAAAAT---AL-TV TAKSLQMY---TDD---PVEFVCDH  
 PpSRP-3 -----KGTEAAAAT---AA-TITLKGISMF---QD---PIDFICDH  
 PpSRP-4 -----KGTEAAAAT---AA-TITLRS LPMF---HE---PTDFVCDH  
 SbSRP-8 -----RGTMAAAGT---VA-MMYGSSMSRD---P---TVDFVADH  
 SbSRP-4 -----KGTVAAAAGT---VGNMMGFAMP---DDL---IVDFVADH  
 OsSRP-7 -----EGTVAAAAGT---VGEIMGFAMP---DDQ---IVDFVADH  
 MtSRP-8 -----RETVAAASVS-----TSVEVKCYTP-----SVDFVADH  
 SbSRP-7 -----EGTKAASAT---A---VAMGFCAHV---EA---PVDFVADH  
 OsSRP-3 -----EGTEAAAAT---A---VVMTLGCAAP---SAPVHVDFVADH  
 AtSRP-4 -----VGSKAAAAA-----AFRGIGCRRP---PPE---KHDFVADH  
 AtSRP-7 -----EGAEAAAAT---AD-GDCGCSLDFV---EPPK---KIDFVADH  
 AtSRP-1 -----EGTEAAAAT---TV-VVVTGSCLWE---PKK---KIDFVADH  
 AtSRP-6 -----KGT EAVTFT---AF-RSAYLG CALV---K---PIDFVADH  
 FvSRP-12 -----DGTEASAVT---VS-VLYGSGGGPP---PPP---EVDFVADH  
 FvSRP-7 -----EGTEASAVT-----AQISGGRAP---PV---EIDFVADH  
 FvSRP-11 -----EGTEASAVT-----VTQMC GGGAP---PV---EIDFVADH

FvSRP-2 -----NGTTAAAT---CA-QEEESMGSP-----KPKV-IKEFLADH  
FvSRP-1 -----NGTAAATAT---CA-ELVWSMGEP-----KPKV-IEEFVADH  
FvSRP-10 -----NGTTAAAT---CA-QVYCSMGSP-----KPKE-IEEFVADH  
FvSRP-9 -----NGTTAAAT---CS-VTS-SAGKVS-----EPDV-KLDFVADH  
FvSRP-14 -----NGTTAAAT---YA-VISCSAGKAS-----EPDE-KLDFVADH  
FvSRP-6 -----EGTEAAAVY---IT-RGPGYSSGID-----PPKPIPVDVADH  
FvSRP-4 -----EGTEAAAT---A-AVAAFGCAAP-----CPVIEKIDFVADH  
FvSRP-13 -----KGTEAAAVT---SW-GGMMCDEAP-----PP---PIDFVADH  
FvSRP-5 -----KGTEAAAVT---AA-VVRMYCAREP-----PR---PIDFVADH  
FvSRP-8 -----KGTEAAAVT---ATGTMCSAGKVP-----PP---PIDFVADH  
AtSRP-2 -----EGTEAAAVS---VA-IMMPQCLMRN-----P-----DFVADH  
AtSRP-3 -----EGTEAAAVS---VG-VVCTSFRRN-----P-----DFVADR  
AtSRP-8 -----EGTEAAAVS-----VASMTKDMLL-----MGDFVADH  
SbSRP-16 -----EGTEAAAS-----AIVTRGTSLL-----RRH---PDDFITDH  
OsSRP-6b -----EGTEATAAV-----MVSMEHSRPR-----RLNFVADH  
OsSRP-5 -----EGTEAAAS---AA-VVSFRSAPV-----TVDFVADH  
OsSRP-6a -----EGTEAAAT---AA-VITLRSAPI-----AEDFVADH  
SbSRP-2 -----EGTEAAAS---AA-VVMLCSFRM-----PTDFVADH  
SbSRP-3 -----EGTEAAAS---AA-TVVLRSFAM-----PQDFVADH  
AtSRP-5 -----EGTEAAAS---AG-VIKLRGLME---ED---EIDFVADH  
FvSRP-3 -----EGTEAAAS---AG-VIKLRGL-----PQ---TMDFVADH  
MtSRP-11 -----VGTEAAAVT-----VTGIAGCSQF-----TSIPTPIDFVADH  
MtSRP-9 -----KGTEAAAVT-----RTGLLGCARP-----TSIPTPIDFVADH  
MtSRP-6 -----EGTKAAAVT---VS-MLCGCSRYSP-----PPPP-PIDFVADH  
MtSRP-16 EEFSGTILFVGKVVNPLDEGTKAAAVT---VS-VLCGCSRYSP-----PPPP-PIDFVADH  
MtSRP-3 -----QGTKAAALALYTP-MTCGSLISP-----PPI---PIDFVADH  
MtSRP-4 -----KGTEAAAVTSMGQK-VTCGRRTGPP-----PT---PIDFVADH  
MtSRP-10 -----AGTEAAAT---FE-CMGFGLCLDD---TP---RIEFVADH  
MtSRP-12 -----AGTEAAAT---AF-IEAEYGMSEV-----EDDTSKIEFVADH  
MtSRP-1 -----EGTEVAKCI-----H---REDFVADH  
MtSRP-13 -----EGVEAAAT-----AAILSKGFSF-----PS---QLDFVADH  
MtSRP-14 -----EGAEAVAVS---AA-FICS-EGIRF---PT---QLDFVADH  
MtSRP-5 -----EGTKAAAT---AG-LLCG-SSLSL---PT---DINFVADH  
MtSRP-2 -----EGTEAVAAT---AT-EVFTSSGMGF---PT---RLDFVAGH  
MtSRP-7 -----EGTEAAAT---AA-TILLRSAMSI---PP---RLDFVADH  
MtSRP-15 -----EGTEAAAS---V-LFMQAQCRR---PT---RMDFFVDH  
SbSRP-12 -----VGTEAAAVT-----VHLRGGGPP---PD---LVEFNADH  
SbSRP-1 -----EGTEAVAVT---YV-GVFAPSCAPP-----GYRPEVDFVADH  
SbSRP-9 -----GGTVANGAT---ASYMLCGASAIME---QPA---TVDFVADH  
OsSRP-10 -----EGTEAAAT---AV-CLTFASAAPS---SRRPARVDFVADH  
OsSRP-8 -----EGTEAAAT---AV-LMEGAARYAP---PPPP-REDFVADH  
OsSRP-12 -----EGTEAVAAT---VV-IMKGRARRPS---PAPA-PVDFVADH  
SbSRP-15 -----EGTEAAAST---AC-VMKKLCRSSR---L---PVNFVADH  
OsSRP-9 -----EGTEAAAST---AC-TIRLLSMSY-----PEDFVADH  
OsSRP-11 -----EGTEAAAT---AC-TMKFLCLTLT---S---PVDFVADH  
OsSRP-15 -----EGTVAAAT-----MTRMLPSGVP---PP---PVDFVAEH  
SbSRP-10 -----EGSEAAAVTVESDD-DMGYSMFDDY---PPPPKPVNFVADH  
OsSRP-13 -----EGSEAAAYT---EE-SDDDLGCSLYDDDYTPPPKLVDFVADH  
SbSRP-13 -----EGTTAVAAI-----PPVRPP---PP---PMRFVADH  
SbSRP-14 -----EARQLRRR---APFLAQVPAGHP---RRSPQMSFVADH  
OsSRP-1 -----EGTTAVEAM---YSPSSPGYSPGYQ---PPRPPMSFVAEH  
OsSRP-2 -----EGTTAVEAT---YS-CCSPTYSGPE---SPKPRMSFVAEH  
SbSRP-5 -----EGTVAAAT---AV-SFCLSGSAIP-----PVDFVADR  
SbSRP-6 -----AGTVAAAT---AV-CMQQCARMGP---P---PVDFVADR  
OsSRP-4 -----LGTVAAAST---AV-VMMQKGSLLP-----PVDFVADR

;

CrSRP-1 PFAFIIMHTPTGLPAFVGT-----  
VcSRP-1 PFAFMIYHNPTNLPAFVGV-----  
SbSRP-11 PFFFFIKEEVSGSVIFMGH-----  
OsSRP-14 PFFFFMIREEVSGTVIFMGH-----  
SmSRP-1 PFMFLVREDATGVVLFVGH-----  
PpSRP-1 PFMFLIMEEVSNAIVFSGR-----  
PpSRP-2 PFMFVIKEEHSNVVIFTGR-----  
PpSRP-3 PFLFVIKEEVTNVIIFTGR-----  
PpSRP-4 PYLFIKEELTNVIIFTGR-----  
SbSRP-8 PFAFFLMEDVSGVVVFAGH-----  
SbSRP-4 PFLFFIMEENIGLIVFAGQ-----  
OsSRP-7 PFLFFIVEEVSGLVVFAGQ-----  
MtSRP-8 PFVFLVRELNSKTILFMGQ-----  
SbSRP-7 PFVFLIKEELSGVVVFAGQ-----  
OsSRP-3 PFMFLIKEDLTGVVVFAGQ-----  
AtSRP-4 PFLFVIVKEYRSGLVFLGQ-----  
AtSRP-7 PFLFLIREEKTGTVLFVQ-----  
AtSRP-1 PFLFLIREDKTGTLLFAGQ-----  
AtSRP-6 PFLFLIREEQTGTVLFAGQ-----  
FvSRP-12 PFMFLIKEDSTGAVLFMGH-----  
FvSRP-7 PFMFFNREDSTGTVLFMGT-----  
FvSRP-11 PFVFFIREDRTGTVLFMGT-----  
FvSRP-2 PFMFLVRENTGTVLFIGQKSPDETAATSLESLSFIRLLSKSPKKTARTLTLSPDRFLQ  
FvSRP-1 PFMFLIRENTRTVMFMGQ-----  
FvSRP-10 PSMFLIRENRTGTVLFMGT-----  
FvSRP-9 PLHVCDKGRHDGNSALHGA-----

FvSRP-14 PFMFLIREDMTGTVLFSLH-----  
 FvSRP-6 PFLYLIREEDVTGTVMFVGH-----  
 FvSRP-4 PFLFLIREEVTGAVMFVGH-----  
 FvSRP-13 PFLYLIREEVTKTVMFVGQ-----  
 FvSRP-5 PFLYLIREEVTKTVMFVGQ-----  
 FvSRP-8 PFLYLIREEATKTVMFVGQ-----  
 AtSRP-2 PFLFTVREDNSGVILFIGQ-----  
 AtSRP-3 PFLFTVREDKSGVILFMGQ-----  
 AtSRP-8 PFLFTVREEKSGVILFMGQ-----  
 SbSRP-16 PFLFLIREDDTGVVLFVGH-----  
 OsSRP-6b PFMFLIREEDVTGVILFIGH-----  
 OsSRP-5 PFLFLIREDMTGVVLFVGH-----  
 OsSRP-6a PFLFLIQEDMTGVVLFVGH-----  
 SbSRP-2 PFLFLIREDDTGVVLFVGH-----  
 SbSRP-3 PFLFLIREDDTGVVLFVGH-----  
 AtSRP-5 PFLLVVTENITGVVLFVGH-----  
 FvSRP-3 PFLFLIKEEMTGTVLFVGH-----  
 MtSRP-11 PFLFFIREDDLSGTILFVGH-----  
 MtSRP-9 PFMFLIRDDLSGTILFVGH-----  
 MtSRP-6 PFLFLIREEFSGTILFVGH-----  
 MtSRP-16 PFLFLIREEFSGTILFVGH-----  
 MtSRP-3 PFLFLIREDDLSGTILFVGH-----  
 MtSRP-4 PFLFLIREDDLSGTILFVGH-----  
 MtSRP-10 PFLFLIRDDLSGTILFVGH-----  
 MtSRP-12 PFLFLIREDDLSGTILFVGH-----  
 MtSRP-1 PFLFLIREVSTGTILFVGH-----  
 MtSRP-13 PFLFLIREDDTGTILFVGH-----  
 MtSRP-14 PFLFLIREDDTGTILFVGH-----  
 MtSRP-5 PFLFLIREDDTGTILFVGH-----  
 MtSRP-2 PFLFMIREDDTGTILFVGH-----  
 MtSRP-7 PFLFMIREDDTGTILFVGH-----  
 MtSRP-15 PFLYLIRDDLAGTILFVGH-----  
 SbSRP-12 PFTFFIMEERSGVIVFAGH-----  
 SbSRP-1 PFVFFVMEEVSGAVVFAGC-----  
 SbSRP-9 PFVFFVIEEVSRAIFVGR-----  
 OsSRP-10 PFAFLVLEESSGAVLFAGH-----  
 OsSRP-8 PFAFFVVEESSGAVLFAGH-----  
 OsSRP-12 PFAFFVVEESSGAVLFAGH-----  
 SbSRP-15 PFVFFVVEEVSRAIVFMGH-----  
 OsSRP-9 PFAFFVVEEESGAVLFAGH-----  
 OsSRP-11 PFAFFVVEEKSDAVLFAGH-----  
 OsSRP-15 PFAYFIVEEMSAVVFAGH-----  
 SbSRP-10 PFAFFIIEQETSGAVVFAGH-----  
 OsSRP-13 PFAFFIVEERSQAVVFAGH-----  
 SbSRP-13 PFMFAIVEYEKAEVLFVGH-----  
 SbSRP-14 PFMFAIVEYEKAEVLFVGH-----  
 OsSRP-1 PFMFAIVEYEKAEVLFVGH-----  
 OsSRP-2 PFMFAIVEYEKAEVLFVGH-----  
 SbSRP-5 PFLFAVVEERSAVLFFVGH-----  
 SbSRP-6 PFLFAVVEERSAVLFFVGH-----  
 OsSRP-4 PFLFAVVEELTGAFLVFLGH-----  
 \*

CrSRP-1 -----V-NDPSQ-----  
 VcSRP-1 -----V-HDPVAA-----  
 SbSRP-11 -----I-LDPSSQS-----  
 OsSRP-14 -----V-LDPSSRT-----  
 SmSRP-1 -----V-NDPSV-----  
 PpSRP-1 -----V-TNPSKQA-----  
 PpSRP-2 -----V-TDPSLAQ-----  
 PpSRP-3 -----I-TDPSVEK-----  
 PpSRP-4 -----I-TDPSVGN-----  
 SbSRP-8 -----V-INPLLAPLP-----  
 SbSRP-4 -----V-VNPLLH-----  
 OsSRP-7 -----V-VNPLLH-----  
 MtSRP-8 -----V-LNPTEGYDDEQVS-----  
 SbSRP-7 -----V-IDPSISQ-----  
 OsSRP-3 -----V-TNPSSST-----  
 AtSRP-4 -----V-MDPSKH-----  
 AtSRP-7 -----I-FDPSGPCSGNSDSDDY-----  
 AtSRP-1 -----I-FDPSELSSALDRA-----  
 AtSRP-6 -----I-FDPSA-----  
 FvSRP-12 -----V-LNPLDG-----  
 FvSRP-7 -----V-LNPLAG-----  
 FvSRP-11 -----V-LNPLAG-----  
 FvSRP-2 ASMSTKNRLNVVNLACLEKVRDLSLNDTTRRSRCFICEERFDHYGVKCEITRLPCRHLF  
 FvSRP-1 -----V-LNPLAGKYHLCGKMGQMETATSTSGTNGTDEAKERERKE  
 FvSRP-10 -----V-LNPLAG-----  
 FvSRP-9 -----G-AQSSCGLIFIVGRYSCTSFSL-----  
 FvSRP-14 -----G-AGPQSSGLITIIILEDVLCCKQVNFVLFHYASYFCSLDY  
 FvSRP-6 -----V-LNPIKEK-----  
 FvSRP-4 -----V-LDPIAE-----  
 FvSRP-13 -----V-LNPIED-----

FvSRP-5 -----V-LNPIED-----  
 FvSRP-8 -----V-LNPIEDSTDFK-----  
 AtSRP-2 -----V-LDPSKH-----  
 AtSRP-3 -----V-LDPSKH-----  
 AtSRP-8 -----V-LDPSIH-----  
 SbSRP-16 -----V-VDPLLA-----  
 OsSRP-6b -----V-VNPLLAV-----  
 OsSRP-5 -----V-VNPLL-----  
 OsSRP-6a -----V-AAE-----  
 SbSRP-2 -----V-VNPLLAP-----  
 SbSRP-3 -----V-VNPLLAP-----  
 AtSRP-5 -----V-VDPLH-----  
 FvSRP-3 -----LNMIIRLISLEIV-----  
 MtSRP-11 -----V-LNPLLK-----  
 MtSRP-9 -----V-LNPLVGRS-----  
 MtSRP-6 -----V-VNPLDG-----  
 MtSRP-16 -----V-VNPLDG-----  
 MtSRP-3 -----V-LNPLVM-----  
 MtSRP-4 -----V-LNPLLK-----  
 MtSRP-10 -----V-LNPLDM-----  
 MtSRP-12 -----V-LNPLDM-----  
 MtSRP-1 -----V-LNPVVG-----  
 MtSRP-13 -----V-LNPLTG-----  
 MtSRP-14 -----V-LNPLDE-----  
 MtSRP-5 -----V-LNPLISNIALLPNPNISSCWVVFVGGTTGFWSASFTHQ-----  
 MtSRP-2 -----V-FNPLAG-----  
 MtSRP-7 -----V-LNPLAG-----  
 MtSRP-15 -----V-LNPLDG-----  
 SbSRP-12 -----V-LDPTK-----  
 SbSRP-1 -----V-LDPSQ-----  
 SbSRP-9 -----I-VDPSVSG-----  
 OsSRP-10 -----V-VDPTDE-----  
 OsSRP-8 -----V-VDPTKS-----  
 OsSRP-12 -----V-VDPTNPSQL-----  
 SbSRP-15 -----V-LDPTKSEHEK-----  
 OsSRP-9 -----V-LDPTSSE-----  
 OsSRP-11 -----V-LDPTSLE-----  
 OsSRP-15 -----I-VDPSME-----  
 SbSRP-10 -----V-LDPSEEV-----  
 OsSRP-13 -----V-LDPSEEE-----  
 SbSRP-13 -----V-MDPSKDD-----  
 SbSRP-14 -----V-IDPSNED-----  
 OsSRP-1 -----V-MDPSKEDQ-----  
 OsSRP-2 -----V-MDPSNEE-----  
 SbSRP-5 -----V-VNPIAE-----  
 SbSRP-6 -----V-VNPLVG-----  
 OsSRP-4 -----V-VNPLAE-----

CrSRP-1 -----  
 VcSRP-1 -----  
 SbSRP-11 -----  
 OsSRP-14 -----  
 SmSRP-1 -----  
 PpSRP-1 -----  
 PpSRP-2 -----  
 PpSRP-3 -----  
 PpSRP-4 -----  
 SbSRP-8 -----  
 SbSRP-4 -----  
 OsSRP-7 -----  
 MtSRP-8 -----  
 SbSRP-7 -----  
 OsSRP-3 -----  
 AtSRP-4 -----  
 AtSRP-7 -----  
 AtSRP-1 -----  
 AtSRP-6 -----  
 FvSRP-12 -----  
 FvSRP-7 -----  
 FvSRP-11 -----  
 FvSRP-2 HGKCILKRSMTSQSCP IPSCLYPMPTIKEEEVAQSSKPPGSRRLNWHGVLAVATGFILTA  
 FvSRP-1 EEQSKIKFKRKSCLKSYRQGWQSFLLRRSAISVAILKATHHTGGTKAYRCGHVHSRVKTYG  
 FvSRP-10 -----  
 FvSRP-9 -----  
 FvSRP-14 SFSLIVLS-----  
 FvSRP-6 -----  
 FvSRP-4 -----  
 FvSRP-13 -----  
 FvSRP-5 -----  
 FvSRP-8 -----  
 AtSRP-2 -----  
 AtSRP-3 -----



AtSRP-8 -----  
SbSRP-16 -----  
OsSRP-6b -----  
OsSRP-5 -----  
OsSRP-6a -----  
SbSRP-2 -----  
SbSRP-3 -----  
AtSRP-5 -----  
FvSRP-3 -----  
MtSRP-11 -----  
MtSRP-9 -----  
MtSRP-6 -----  
MtSRP-16 -----  
MtSRP-3 -----  
MtSRP-4 -----  
MtSRP-10 -----  
MtSRP-12 -----  
MtSRP-1 -----  
MtSRP-13 -----  
MtSRP-14 -----  
MtSRP-5 VCGGAGAQRLLVVVFGDPLGWMVHRGRSRFRSLSGWFSVLHHC SGFAFSVVLVNYV-----  
MtSRP-2 -----  
MtSRP-7 -----  
MtSRP-15 -----  
SbSRP-12 -----  
SbSRP-1 -----  
SbSRP-9 -----  
OsSRP-10 -----  
OsSRP-8 -----  
OsSRP-12 -----  
SbSRP-15 -----  
OsSRP-9 -----  
OsSRP-11 -----  
OsSRP-15 -----  
SbSRP-10 -----  
OsSRP-13 -----  
SbSRP-13 -----  
SbSRP-14 -----  
OsSRP-1 -----  
OsSRP-2 -----  
SbSRP-5 -----  
SbSRP-6 -----  
OsSRP-4 -----

CrSRP-1 -----  
VcSRP-1 -----  
SbSRP-11 -----  
OsSRP-14 -----  
SmSRP-1 -----  
PpSRP-1 -----  
PpSRP-2 -----  
PpSRP-3 -----  
PpSRP-4 -----  
SbSRP-8 -----  
SbSRP-4 -----  
OsSRP-7 -----  
MtSRP-8 -----  
SbSRP-7 -----  
OsSRP-3 -----  
AtSRP-4 -----  
AtSRP-7 -----  
AtSRP-1 -----  
AtSRP-6 -----  
FvSRP-12 -----  
FvSRP-7 -----  
FvSRP-11 -----  
FvSRP-2 MLASRFWDL CVSYI-----  
FvSRP-1 FIHIVDWCRIRCSKTEYLVM-----  
FvSRP-10 -----  
FvSRP-9 -----  
FvSRP-14 -----  
FvSRP-6 -----  
FvSRP-4 -----  
FvSRP-13 -----  
FvSRP-5 -----  
FvSRP-8 -----  
AtSRP-2 -----  
AtSRP-3 -----  
AtSRP-8 -----  
SbSRP-16 -----  
OsSRP-6b -----  
OsSRP-5 -----

OsSRP-6a -----  
SbSRP-2 -----  
SbSRP-3 -----  
AtSRP-5 -----  
FvSRP-3 -----  
MtSRP-11 -----  
MtSRP-9 -----  
MtSRP-6 -----  
MtSRP-16 -----  
MtSRP-3 -----  
MtSRP-4 -----  
MtSRP-10 -----  
MtSRP-12 -----  
MtSRP-1 -----  
MtSRP-13 -----  
MtSRP-14 -----  
MtSRP-5 -----  
MtSRP-2 -----  
MtSRP-7 -----  
MtSRP-15 -----  
SbSRP-12 -----  
SbSRP-1 -----  
SbSRP-9 -----  
OsSRP-10 -----  
OsSRP-8 -----  
OsSRP-12 -----  
SbSRP-15 -----  
OsSRP-9 -----  
OsSRP-11 -----  
OsSRP-15 -----  
SbSRP-10 -----  
OsSRP-13 -----  
SbSRP-13 -----  
SbSRP-14 -----  
OsSRP-1 -----  
OsSRP-2 -----  
SbSRP-5 -----  
SbSRP-6 -----  
OsSRP-4 -----

## D. I6 Cereal.

VvATI-1 -----MAKLSIFAATLLLLLAI SNAT--IY  
RcATI-5 -----MAKLIPAVALISVLLFI IANASFAY  
RcATI-1a -----MAKLIP TIALVSVLLFI IANASFAY  
RcATI-2a -----MAKLIP TIALVSVLLFI IANASFAY  
RcATI-6a -----MAKLIP TIVTLISVLLVI IANASFAY  
MgATI-1 -----MANKATLAAALLVALVTLT SATS YTT  
RcATI-6b -----  
RcATI-4 MQKLYHTINNLHLLHSNTHRSNSYFLSTARSQASSTMAKFALLASF IALLFLVDAS IY  
RcATI-1b -----  
RcATI-2b -----  
RcATI-3 -----MAKLA ILLASF IALLFLVDAS--IY  
OsATI-9 -----MASKVVF FFAALMAAMVAI----  
SbATI-8 -----MAKIAAVAATAALCLAALVAVAVGQ  
OsATI-10 -----MAPNKGDLC LPVENE I SNYTMVLSVALDS  
BdATI-2 -----MAYNKVVFVSVLLVLSMLAAATNSM  
OsATI-6 -----MAFIKVVFSVLLPVVVSMLVAT  
OsATI-8 -----MGELLSLSYKLT IKNFCKQKMASNKVVISALLVVVSVLAAT  
OsATI-11 -----MASNKVVFVSVLLLVVLSVLAAM  
OsATI-7 -----MASNKVVFVSVLLLAVVSVLAATA  
OsATI-1 -----MKTNLNLSYKFR LKIFCKQKAMASNKVVF SALLLI IVSVLAAT  
OsATI-5 -----MASKNSKLSVSSVAVALVALMVVVGVAVAA  
BdATI-3 -----MTTSKKKLVSSVLLAAVILLAATA  
OsATI-3 -----MALASDKFVLSAIVLAVLTVAAAA  
OsATI-4 -----MASASDKLVLSAIVLAVLAAVVAAA  
ZmATI-1 -----MACCTT SRLVLVLSAAAALLAVAGGA----  
SbATI-5 -----MACCT SRLVLAVSVAASVLLAAVLSAAAA  
SbATI-6 -----MACFTNHLVVLVSSSAVLLAVVLGTAAS-  
SbATI-2 -----MASTTRSSYI ILLSAAVLLSVVGGAM---  
SbATI-3 -----MASTRSSSYI ILLSAAVLLSVLAAT----  
BdATI-1 -----MASNQKLLFLCSAAVLLSALITAAAD  
SbATI-1 -----TA-----  
SbATI-4 -----MVSGHLLLSAGVLLSVLAACAATV  
OsATI-2 -----MASKNLLLSAAVLLSVLAI AAAAA  
SbATI-7 -----MASSSSSNLLAAAVLLSVLAAAGASA  
ZmATI-2 MPLTWCCSIFQVTNANCTKKS IERPSTGELMASSSSSHRRLILAAAVLLSVLAAASASA

VvATI-1 QTTVITRDDG-----SEFGQ--FQGSQSQRCRQQA EQQ-QGGQ--GDVL  
RcATI-5 RTTITTV EVD-----TNTQER---CFRD---LRGKEFRACQMYLSQS-SSRRSTDGEV  
RcATI-1a RTTIT TIEIDESKGEREGSSSQ---CRQE---VQRKDLSSCERYLRQS-SSRRSPGEEV  
RcATI-2a RTTIT TIEIDESKGEREGSSSQ---CRQE---VQRKDLSSCERYLRQS-SSRRSPGEEV  
RcATI-6a GTTIEIDDTKAGGE---GSRSQ---CHQE---FQRKDLSSCEQYIRQS-SSRRSPGEEV  
MgATI-1 TVTTTTIDDEAT-----RGEQQE---CRQH---VQGRLYLSCQRYLSQR-SQYGGDEEEV  
RcATI-6b -----PNQEG---CRQHI---IGQQKLRQCQEYITQQ-YGV-----  
RcATI-4 RTTVIVDEEDAN-----PSYQS---CREQV---VMRQYLSPCQEYIRQQ-VAGLGLSHG-  
RcATI-1b -----PSQQG---CRGQI---QEQQNLRQCQEYIKQQ-VSG-----  
RcATI-2b -----PSQQG---CRGQI---QEQQNLRQCQEYIKQQ-VSG-----  
RcATI-3 RTTVIVDAEDANNILRQDIHQQRGSCSAEI---EKQQLWRCQQYIKKE-VTG-----  
OsATI-9 --SGAQLSESEM-----RFRDRQ---CQRE---VQDSPLDACRQVLD RQ-LTGR---ER-  
SbATI-8 GVVERQLKDLQ-----CWQE---VQENPLGACRQVLD RQLTGGMRYGIGP  
OsATI-10 CLHACGNDNNGRPPLGGVYPQPALPAKNRL--LDVYPLPRCRTMVKGQ-CIGGGAAGNV  
BdATI-2 AAAAAARYGAVA-----NTPGEW---CWAGMG-FPVYFPFPRCALVKSQ-CLGAQAAQS-  
OsATI-6 TTMADHRGQVV-----YTPGQL---CAAGRG-YPMYPLPRCALAKRQ-CAGGAVDE--  
OsATI-8 TTMADHHQEQVV-----YTPGQL---CQPGIG-YPTYPLPRCRAFVKRQ-CVAPGTVDE-  
OsATI-11 ATMADHHQV-----YSPGEQ---CRPGIS-YPTYSLPQCRTLVR RQ-CVGRGAASAA  
OsATI-7 TMAEYHHQDQVV-----YTPGPL---CQPGMG-YPMYPLPRCALVKRQ-CVGRGTAAAA  
OsATI-1 ATMADHHKDQVV-----YSLGER---CQPGMG-YPMYSLPRCRAVVKRQ-CVGHGAPGGA  
OsATI-5 AAGGEEYGGVA-----RAADG---CEPGQGVVPKDP LPGCRAYLLRR-CGGGDPP---  
BdATI-3 AAEGADDDYGE-----GDVGEY---CRVGK-IPYNPLPGCREYITRW-CAVRNDPKKQ  
OsATI-3 GYGGY-----CRVGKA-VSRNPVPSCRNYIARW-CAVAGGR LDS  
OsATI-4 SGY-----GDVGEY---CRVGKA-VSRNPVPSCRNYIARW-CAAAGGRMDS  
ZmATI-1 -----AEAPSY---CAPGQA-IPYRPLSGCTWYVASR-SCDVIEA---  
SbATI-5 -----SAPPSY---CAVGKA-IPHSPLSGCVWYVATR-SCDMAVS---  
SbATI-6 -----GAPPSY---CAVGKA-IPHSPLSGCAWYVATR-SCDMAVS---  
SbATI-2 -----AARTNW---CEPGLV-IPLNPLPSCRTYLVR R-TCGLG-----  
SbATI-3 -----AAAANW---CEPGLV-IPLNPLPSCRTYMVRR-ACGVS-----  
BdATI-1 GVQED-----DQNGEWW---CYPGKA-FPHNPLGSCRTYVISR-ACHRGPLPM  
SbATI-1 -----CAPGMA-IPIPPVPSCRIYAVSR-TCGLGGP---  
SbATI-4 DVTA-----CAPGLA-IPAPPVPTCRIYTVSR-TCGLGGP---  
OsATI-2 TASAATTS-----CQPGMA-IPHDPLRGCRRYVLR R-ACGLAAGRRL  
SbATI-7 GTT-----CVPGWG-IPHNPLPSCRWYVASR-TCG-----  
ZmATI-2 GTS-----CVPGWA-IPHNPLPSCRWYVTSR-TCG-----

VvATI-1 IILRGIRNQQQEQWLRQCCQALQNM-D--QQCQCEGLRQIVQRV-----  
RcATI-5 LLEMPGEKDQQR-HQLQECCNELKQV-R--DECQCEALQVAVEKQIESEQ-----  
RcATI-1a LRMPGDENQQQESQQLQCCNQVKQV-R--DECQCEAIKYIAEDQIQGGQ-----  
RcATI-2a LRMPGDENQQQESQQLQCCNQVKQV-R--DECQCEAIKYIAEDQIQGGQ-----  
RcATI-6a LRMPRAEDQQQETQQLQCCNQVEQL-R--HDCQCEAIKSI AEYQIQGGH-----  
MgATI-1 VEMTTTGNPKERSQDLRSCCQQLHYV-K--QQCRCEAIKLAEEVQQEGG-----  
RcATI-6b --QRSRRSDSNQQQSLRRCCDIKQMPETTQCRCEALYYAVEEKYLQGG-----  
RcATI-4 --YNPR-----LRDCCERIQSM-Q--TQCRCEGLRMAIDQQKSKGQ-----  
RcATI-1b --QGPRRSNDQE-RSLRGCCDHLKQM-Q--SQCRCEGLRQAI EQQSQGG-----  
RcATI-2b --QGPRRSNDQE-RSLRGCCDHLKQM-Q--SQCRCEGLRQAI EQQSQGG-----  
RcATI-3 --WGPRM-----DYVPLCCDHLEQM-T--SQCRCEGLRQAI QKQSEGG-----  
OsATI-9 --FQPMFRPPGALGLRMCCQQLQDV-S--RECRCAAIRRMVRSYEESSMP---MPLEQG  
SbATI-8 FRWGT-----GLMRCCQQLQDV-S--RECRCAAIRSMVRYEETMPPLEKGGWGGQ  
OsATI-10 DE-----QVWRDCCRQLATINN--NLRCRPVLSHKL VGMKELG-----  
BdATI-2 -----SVREDCCRQLAAIPD--DFCKCPALGAMRDSMYKELG-----  
OsATI-6 -----QVRQDCCRQLAAIDD--SFCRCPALSHMLVGMKELG-----  
OsATI-8 -----QVRGCCRQLAAIDS--SWCRCDALNHMLRIIYRESG-----  
OsATI-11 DE-----QVWQDCCRQLAAVDD--GWCRCGALDHMLSGIYRELG-----  
OsATI-7 E-----QVRRDCCRQLAAVDD--SWCRCEAI SHMLGGIYRELG-----  
OsATI-1 VDE-----QLRQDCCRQLAAVDD--SWCRCSALNHMVGGIYRELG-----  
OsATI-5 -----GVRARCCHQLREV-A--ARCRCDALRAMVEVLVEEEE-----  
BdATI-3 --LVPD-----EVKRRCCGEVSEL-P--KGCRCDALGILANGVITTEG-----  
OsATI-3 GKQPPR-----QLLEPCCRQLAAV-P--MQCRCDALSVLVRGVVTEEG-----  
OsATI-4 RKQPPR-----EFLEPCCRQLAAV-P--MQCRCDALSVLVRGVVTEEG-----  
ZmATI-1 --MLPNRA-----VLKETCCSQRDI-P--AECRCRALRVMMETPLVVG A-----  
SbATI-5 --MLP-----VLKETCCGLEQI-P--AECRCRALRVMM EAPLVVGADTGAQRRCRA  
SbATI-6 --MLP-----VLKETCCGLEHI-P--AECRCRALRVMM EAPLVVG A-----  
SbATI-2 --RGPVPLP-----VLKGRCCLEKIVP---YCRCGALRIMMDGM--PGG-----  
SbATI-3 --IGPVVPLP---VLKERCCSELEKIVP---YCRCSALRTALDSMMTG-----  
BdATI-1 -----LVKERCCRELGA VHP--DRCRREALRVLM DGVVVEGG-----  
SbATI-1 --YGPVADPSP---VLKERCCQELAAV-P--SRCRC DALY YMM DTEF--GR-----  
SbATI-4 --YGPVDPSP---VLKQRCCRELAAV-P--SRCRCAALGFMM DGV DAPLQ-----  
OsATI-2 YDW-----SLKERCCQELAAV-P--AYCRCAALAYFMDGA-SEGR-----  
SbATI-7 --IGPLPLP---ELRRRCCRELADI-A--AYCRCTALS ILIDGVI PPGP-----  
ZmATI-2 --IGPRLPWP---ELKRRCCRELADI-P--AYCRCTALS ILMDGAI PPGP-----  
\*\* : : \* . :

VvATI-1 -----  
RcATI-5 -----QMQ-----  
RcATI-1a -----LH-----  
RcATI-2a -----LH-----  
RcATI-6a -----LQ-----  
MgATI-1 -----QWQ-----  
RcATI-6b -----VE-----  
RcATI-4 -----IL-----  
RcATI-1b -----LQ-----  
RcATI-2b -----LQ-----  
RcATI-3 -----IE-----  
OsATI-9 -----WSSSS-----  
SbATI-8 PQQPGYDYPQS QAGEGYGEGSQ-----  
OsATI-10 -----TAAHQPM-----  
BdATI-2 -----VVMKGEVGDGTVEA-----  
OsATI-6 -----APA-----KGQPM-----  
OsATI-8 -----AADAGHPM-----  
OsATI-11 -----ATE-----AGHPM-----  
OsATI-7 -----APDVGHM-----  
OsATI-1 -----ATD-----VGHM-----  
OsATI-5 -----  
BdATI-3 -----VKVGR-----  
OsATI-3 -----DRVAGMIS-----  
OsATI-4 -----DRVSGMIS-----  
ZmATI-1 -----E-----  
SbATI-5 AQA RFAPAVVAAGECGLRTVHGRPFNCNKLDADRRPVLVLSATAVLLAVVFFGAATTTAA  
SbATI-6 -----D-----  
SbATI-2 -----  
SbATI-3 -----  
BdATI-1 -----RVVEGR-----  
SbATI-1 -----  
SbATI-4 -----  
OsATI-2 -----L-----  
SbATI-7 -----DAQLEGR-----  
ZmATI-2 -----DAQLEGR-----

VvATI-1 -----  
RcATI-5 -----REQY-----  
RcATI-1a -----GEES-----  
RcATI-2a -----GEES-----  
RcATI-6a -----GEES-----  
MgATI-1 -----TGEL-----  
RcATI-6b -----EAYL-----  
RcATI-4 -----GQDS-----  
RcATI-1b -----GQDV-----  
RcATI-2b -----GQDV-----  
RcATI-3 -----GEDV-----  
OsATI-9 -----SEYYGEGS-----  
SbATI-8 -----QQMYPPCRP-----  
OsATI-10 -----DEVFPGCRR-----  
BdATI-2 -----AEIFPGCRT-----  
OsATI-6 -----DEVFPGCRR-----  
OsATI-8 -----AEVFRGCR-----  
OsATI-11 -----AEVFRGCR-----  
OsATI-7 -----SEVFRGCR-----  
OsATI-1 -----AEVFRGCR-----  
OsATI-5 -----APLACK-----  
BdATI-3 -----MEAVPGCD-----  
OsATI-3 -----QHAAPGCDA-----  
OsATI-4 -----QHAAPGCDA-----  
ZmATI-1 -----PGAQQRCRV-----  
SbATI-5 SAAAAAAPSYPYCAVGKAI PGCVWYVASRSCDVVAAMLNPNRASLRATCCGQLQNVPAECRC  
SbATI-6 -----TGAQRRCA-----  
SbATI-2 -----GEDTPPCSW-----  
SbATI-3 -----YEMRPTCSW-----  
BdATI-1 -----LGDLRGCPR-----  
SbATI-1 -----LQDFRGCTR-----  
SbATI-4 -----DFRGCTR-----  
OsATI-2 -----LEDLPGCPR-----  
SbATI-7 -----LEDLPGCPR-----  
ZmATI-2 -----LEDLPGCPR-----

VvATI-1 -----  
RcATI-5 -----QEV-----  
RcATI-1a -----ERVA-----  
RcATI-2a -----ERVA-----  
RcATI-6a -----ERVG-----  
MgATI-1 -----QQV-----  
RcATI-6b -----FDAF-----  
RcATI-4 -----RQAY-----  
RcATI-1b -----FEAF-----  
RcATI-2b -----FEAF-----  
RcATI-3 -----REAF-----  
OsATI-9 -----SSEQGYGEGSSEEGYGEQQQP GMTRVRLTRAR  
SbATI-8 -----GTGQKI-----ARVKLTKAR  
OsATI-10 -----DNMKCM-----  
BdATI-2 -----EVM-----  
OsATI-6 -----GDM-----  
OsATI-8 -----GDIE-----  
OsATI-11 -----GDLE-----  
OsATI-7 -----GDLE-----  
OsATI-1 -----GDLE-----  
OsATI-5 -----GAMAAI-----  
BdATI-3 -----ETIAFL-----  
OsATI-3 -----ATIAGM-----  
OsATI-4 -----ATIAGM-----  
ZmATI-1 -----A-QARF-----  
SbATI-5 RALRVMMETTPLVVGADPGAQRRCAAQARF-----  
SbATI-6 -----A-QPRF-----  
SbATI-2 -----GGQLEL-----  
SbATI-3 -----GGLLEF-----  
BdATI-1 -----QIQRGF-----  
SbATI-1 -----EMQRDL-----  
SbATI-4 -----EMQRTE-----  
OsATI-2 -----ETQRGL-----  
SbATI-7 -----AVQRRF-----  
ZmATI-2 -----EVQRGF-----

VvATI-1 RDRVRVRESSSR--R-----  
RcATI-5 QKARSIPSSCGL---PEQ---CQIRTFFF-----  
RcATI-1a QRAGEIVSSCGV--R-----CMRQTRTN-----  
RcATI-2a QRAGEIVSSCGV--R-----CMRQTRTN-----  
RcATI-6a QRASDIVSSCGL--R-----CLRQIQKN-----  
MgATI-1 ERARYLPRQCNF--RSPQQ---CQFRDLFL-----  
RcATI-6b KTARYLPLQCGV--E-PRE---CQ-----  
RcATI-4 NIAQDLPYTCGV--S-PQK---CRFGTRWGF-----  
RcATI-1b RTAANLPSMCGV--S-PTE---CRF-----  
RcATI-2b RTAANLPSMCGV--S-PTE---CRF-----  
RcATI-3 RIAQDLPSRCGV--S-PSP---CQFEPGLGF-----  
OsATI-9 QYAAQLPSMCRV--E-PQQ---CSIFAAGQY-----  
SbATI-8 QYAAQMPMMCRV--SEPQE---CSVFSGGDQYY-----  
OsATI-10 -VVASLLALCGV--DIHIGIGVC-----  
BdATI-2 RAIASIPAFCNQ--RIPIGTDGVCYWLSYYQHPKQVTS-  
OsATI-6 RVAASLP AFCNV--DIPIGIGVCYWLSYPMNPATGH--  
OsATI-8 RAAASLP AFCNV--DIPNGVGGVCYWLPGTGY-----  
OsATI-11 RAAASLP AFCNV--DIPNGPGVCYWLGYPRTPTRGH--  
OsATI-7 RAAASLP AFCNV--DIPNGGGVCYWLARSY-----  
OsATI-1 RAAASLP AFCNV--DIPNGTGGVCYWLGYPRTPTRGH--  
OsATI-5 AEGLPGRDECDLDRADDGGSRRCHLVIN-----  
BdATI-3 ASDLMEIRHCYI-----GYSCPLFGGGMD-----  
OsATI-3 ASALTDYGRCNL--Q-HTG-FFGCPMFGGGMD-----  
OsATI-4 ASALTDYGRCNL--QHTAG-SFACLMFGGGMD-----  
ZmATI-1 APALVAAAECGL--LTAHG-RRFCNALDAE-----  
SbATI-5 APAVVAAGECSL--RTVHG-RPVCNALDAE-----  
SbATI-6 APAVVAAGECGL--RTVHG-WPFCNALDAE-----  
SbATI-2 APTLVSEAECNL--MTIHG-RPFCYALGAEGTTD-----  
SbATI-3 APTLVSEAECNL--RTIHG-RPFCYALGAEGTTSD-----  
BdATI-1 AATLLTPGECGL--RA-----  
SbATI-1 ARRLTRAEECNL--PTVDG-G-----  
SbATI-4 ARRLTRAEECNL--PTIDG--GMCHSLNSRPVLESVSTY  
OsATI-2 AAMLTPGECNL--ETIHG-GPYCLELTDREMPKY-----  
SbATI-7 AATLITEAECNL--PTITG-VAECPWILGGETMPSK----  
ZmATI-2 AATLVTEAECNL--ATISG-VAECPWILGGGTMPSK----

## E. I12 Bowman-Birk.

```

MtBBI-9 -----
GmBBI-2 -----M
GmBBI-4 -----M
GmBBI-9 -----M
GmBBI-5 -----M
GmBBI-1 -----M
GmBBI-3 -----M
MtBBI-12 -----MYCYCYLPLHKENKCIC
MtBBI-1 -----MVAHTLARAKDIKRIVIM
GmBBI-8 -----
MtBBI-5 -----
MtBBI-7 -----
MtBBI-4 -----M
MtBBI-2 -----
GmBBI-7 -----
MtBBI-6 -----
GmBBI-6 -----
MtBBI-8 -----
GmBBI-12 -----
MtBBI-11b -----MEL
GmBBI-10 -----
GmBBI-11 -----
MtBBI-3 -----MD
MtBBI-11a -----MVL
MtBBI-10 -----
OsBBI-9 -----
SbBBI-1 -----
ZmBBI-4 MRTLQALFFLALALIGAVLAQSSNRHHHHYHHAVQKGRCPSAPTPTQLLPKSRNLGVFF
SbBBI-3 -----
SbBBI-2 -----
SbBBI-4 -----
SbBBI-7 -----
SbBBI-5 -----
SbBBI-6 -----
ZmBBI-2a -----MDMELEHGEAEDDRGSYSSSSSKRSFGASSDATASSTPS
ZmBBI-3a -----MRLRMNNHQQLQAWRKKKGI
ZmBBI-1a -----MA
OsBBI-1a -----
OsBBI-2a -----
OsBBI-7b -----
OsBBI-8b -----
OsBBI-3a -----
OsBBI-6b -----
OsBBI-5a -----MTM
OsBBI-8a -----
OsBBI-6a -----
OsBBI-7a -----
BdBBI-3 -----
BdBBI-5 -----
ZmBBI-1b -----
BdBBI-1 -----
ZmBBI-2b -----
ZmBBI-3b -----
BdBBI-2a -----
BdBBI-4a -----
BdBBI-2b -----
OsBBI-4b -----
BdBBI-4b -----
OsBBI-4a -----
BdBBI-6b -----
BdBBI-6a -----MTKRG
OsBBI-3b -----
OsBBI-8c -----
OsBBI-2b -----
OsBBI-6c -----
OsBBI-7c -----
OsBBI-1b -----
OsBBI-5b -----

MtBBI-9 -----MKLSFLLFLLGF-----IAIVV
GmBBI-2 GLKNNMVVLKVCLVLLFLVGG---TTSASL-----RLSELGLL
GmBBI-4 GLKNNMVVLKVCLVLLFLVGG---TTSANL-----RLSKLGLL
GmBBI-9 SLKNNMVVLKVCLLLLFLVGV---TAA-----RMELSF
GmBBI-5 GLKNNMVVLKVCFVLVFLVGV-----TNARMEL
GmBBI-1 GLKNNMVVLKVCFVLVFLVGV-----TNARMEL
GmBBI-3 GLKNNMVVLKVCFVLVFLVGV-----TNARMEL
MtBBI-12 KVMESENKNTFVKLSVLLLLLC---FTATIVD-----ARFDSTPFTTRVLS
MtBBI-1 GLMNKKTMIKLAM-LIFLLSF---IATIDAR-----FDSK
GmBBI-8 -----MELKKVGLVLFLLG-----FTATTVDA-----TGFNPNSLITQLLP

```

MtBBI-5 -----MDLKMKVLLFFLGLAT-----  
 MtBBI-7 -----MGLKMKIALLLFFLG-----LTTIID-----ARFEPNSLITQVIS  
 MtBBI-4 ELMKKKATMISLAFVFLLS-----FTATVDA-----RFDPTSFIAQVVS  
 MtBBI-2 --MELNKALLNVASLLFLLN-----FTATVDA-----RFDPISLNTQVLS  
 GmBBI-7 --MEMKKLVLVKVALFLFIC-----FTASNVD-----ARSRSINPG  
 MtBBI-6 -----MKVVLLFILG-----FATTIDA-----HFDPSSLVTQVLP  
 GmBBI-6 -----MGLSMKVVIASILLLLG-----FTAITVS-----  
 MtBBI-8 -----MMKLALLVFLG-----FTSTVDA-----RFDPTSFITQVIS  
 GmBBI-12 MMELKKVALVKVALLFLLG-----FSATTAD-----ATRFDPSSFITQVLP  
 MtBBI-11b MNKKNKAMVMKLALLVFLG-----FTSTVDA-----RFDSTSFITQVIS  
 GmBBI-10 --MELSMKVLVKVASLLFLLG-----FTATVVD-----ARFDPSSFITQFLP  
 GmBBI-11 --MELSMKVLVKVASLLFLE-----FTATVVD-----ARFDPSSFITQF  
 MtBBI-3 LMMNKKAMVMKLALLVFLG-----FTSTVVD-----ARFDGSSFITQLLS  
 MtBBI-11a M-MNKKAMMKLALLVFLS-----FTSTMVA-----RFDRASFITQLLS  
 MtBBI-10 --MELNKTMMKLALLVFLS-----FTSTMV-----  
 OsBBI-9 MRSSSALFLAFVLLAVFLAAL----PFAESSGRHH-----HHHSHLHGRGEGER  
 SbbBI-1 -----MEDGPGQGGG  
 ZmBBI-4 ADPQSIQDLFSVFSALVVLGK---FKICSLPCYQHAWVVQFGSWVPNRPLVSGQGAGG  
 SbbBI-3 --MRPQVLLVSLAVFVLLVA---LPLGKAN-----E  
 SbbBI-2 --MRLQVLLVTLGVLAVLAA---LP-----L  
 SbbBI-4 ---MRSQVILVVVTLALLGV---LAALPLG-----  
 SbbBI-7 ---MRPLVILAAVTLVALGV---LATLPLG-----  
 SbbBI-5 ---MRPQLILVVTLALLGV---LAALPLG-----  
 SbbBI-6 ---MRPQLILVVTLALLGV---LAALPLG-----  
 ZmBBI-2a KLQALSKMISAKAAGVQSTGA---AEASTAGAAVTGFLDKVVLFTVCFGATATDSTATDG  
 ZmBBI-3a AAGSGMGTSPVIPATMLFVAL---LVAVCFGA-----TAARSSSHARHTDAD  
 ZmBBI-1a MGAASILLMMVSLTLLLAAG-----AGAGGTIRLSSDVGVYILRAGVAADLVTAMAR  
 OsBBI-1a --MNSGNMATSSILFFLLG-----LTVAVAA-----HGTANDDTNIR  
 OsBBI-2a --MKMKRTMAATSILFFLAG---LAAAHGS-----TADDTTTTTNTIR  
 OsBBI-7b -----  
 OsBBI-8b -----  
 OsBBI-3a ---MKTAMTTSTL-LFLLLAG---LTAAALG-----TADDDTTNTIRLP  
 OsBBI-6b -----  
 OsBBI-5a KVKSTMMAASMLLFLVLAGI---VTATTTT-----TDSNIRLPS  
 OsBBI-8a --MSNNSMATSTILLFLLAVGG---LAAAHGDTIR-----  
 OsBBI-6a ---MSNTTMASTILLFLLAG---LAAAHGD-----GDTTIRL  
 OsBBI-7a ---MSNTTMAISTILLFLLAG---LVAAHGD-----GDTMIR  
 BdBBI-3 ---MKRGIAFILVLTLSLAGG-----RLSAAAVADVAI I  
 BdBBI-5 --MKRGIAFILVLTLSLAGGRLSAAAVADVA-----IIRLPAHAGG  
 ZmBBI-1b -----MAD  
 BdBBI-1 MKGSCINTIQVVLGAMLLAGAGAPSMVAVPVDTAGVPVTLPTGYRGKGSAVIQDQTTLR  
 ZmBBI-2b -----  
 ZmBBI-3b -----  
 BdBBI-2a MEGVRVATVLLMLSLVAAACC---LSAAAAD-----VDTIRLP  
 BdBBI-4a -----  
 BdBBI-2b -----DKVFADEATIVA  
 OsBBI-4b -----  
 BdBBI-4b -----DDN  
 OsBBI-4a --MKSGSLLTLTLGALLLAGI---PISSAAV-----TPNSN  
 BdBBI-6b -----EEEEEEA  
 BdBBI-6a STAAAIGLLMLSLPAALLVAG---MAADKED-----TIRLPSDSVVEAE  
 OsBBI-3b -----  
 OsBBI-8c -----  
 OsBBI-2b -----  
 OsBBI-6c -----  
 OsBBI-7c -----  
 OsBBI-1b -----  
 OsBBI-5b -----

MtBBI-9 DAGLDPTTFIT--QEQNNEGCCNDC--EC--SS--LT-FPP-CRCNDATG-RSCHPGCDN  
 GmBBI-2 MKSDHHQHSND--DDSSK-PCCDQC--AC---T--KS-NPPQCRCSDMRL-NSCHSACKS  
 GmBBI-4 MKSDHHQHSND--DESSK-PCCDQC--AC---T--KS-NPPQCRCSDMRL-NSCHSACKS  
 GmBBI-9 FKSDQSSSYDD--DEYSK-PCCDLC--MC---T--RS-MPPQCSCEDIIRL-NSCHSDCKS  
 GmBBI-5 NLFKSDNSSSD--DESSK-PCCDLC--MC---T--AS-MPPQCHCADIRL-NSCHSACDR  
 GmBBI-1 NLFKSDHSSSD--DESSK-PCCDLC--MC---T--AS-MPPQCHCADIRL-NSCHSACDR  
 GmBBI-3 NLFKSDHSSSD--DESSK-PCCDLC--MC---T--AS-MPPQCHCADIRL-NSCHSACDR  
 MtBBI-12 NGEDTYDVIYHS-----ACCDKC--ECYVKE--GH-FPPQCICRDDG---CHSACKK  
 MtBBI-1 SFITQVISSND--VNSTTNRCKNVEWYF---V--EW-IPIMCQCLDIVE-T-CESTCKY  
 GmBBI-8 QIEGDSDDNYV--KSNTE-PCCDNC--LC---T--NS-IPPKCQCTDWAEE--DCHSACKG  
 MtBBI-5 -----TTKST-GCCDNC--TC---T--RS-LPPDCTCDDVVP--FCHSDCKS  
 MtBBI-7 NGV-----KSTCK-PCCNNC--SC---T--FS-IPPKCQCRCKDVVP--TCHSACKT  
 MtBBI-4 NGDATNYTV---KFTAI-TCCNKC--IC---T--KT-IPSMCRCVDVVE--TCRSGCRS  
 MtBBI-2 NVKLITF-----SCDNC--HC---T--TT-IPPLCRCADIVK-NKCNACKL  
 GmBBI-7 SFIIAGDNYNL--KSTTS-ACCDAC--AC---T--KS-IPPICHCHDFGE--TCHSACNL  
 MtBBI-6 NGDASYVVKKS--TTTAT-ACCDKC--YC---T--KS-RPPQCHCADLNK--TCNSACKL  
 GmBBI-6 --GDANNYYI--KSTTK-ACCDKC--YC---S--KS-IPPKCYCADVGI--TCHSACKV  
 MtBBI-8 NGEA---AYDV--KSTTT-GCCNCS--QC---T--RS-FPQAC-CLD-----  
 GmBBI-12 NNYYVKI-----KSTAT-ACCDLC--LC---T--KS-YPPQCNCVDESE-TGCHSCCKN  
 MtBBI-11b NGDSTTNNYDA--KSTAT-ACCNTC--LC---S--VPELTCRCADVVK--TCHSACKN  
 GmBBI-10 NAEANNYYV---KSTTN-GCCDNC--RC---T--IS-ISPMCKCADIGE--TCHPSCKS  
 GmBBI-11 LPNAEANNYYV---KSTTK-ACCNSC--PC---T--KS-IPPKCQCRSDIGE--TCHSACKT  
 MtBBI-3 NGEATYEV-----KSTTT-ACCNSC--PC---T--KS-IPPKQCHCADIGE--KCHSACKR



MtBBI-11a NGEA-----NT--KSTTT-ACCDFC--PC---T--RS-IPPQCQCTDVKE--KCHSACKS  
MtBBI-10 -----DATTT-ACCDSC--PC---T--KS-IPPQCHCTDIGE--TCHSACKS  
OsBBI-9 GGEASRLAAGK--AAAW-PCCDNC-GGC---T--KS-IPPQCQCMDARP-AGCHPACKS  
SbBBI-1 GGELASRGKA--AARAW-PCCDSC-GGC---T--KS-EPRRCQCLDAVP-RGCHPACRD  
ZmBBI-4 GGELASRAKA--AARAW-PCCDSC-GGC---T--RS-EPRRCQCLDAAP-RGCHPACRD  
SbBBI-3 EKEAAAEVDA--RRRW-PCDDEC-GVC---T--RS-QPPICQCLDTST-SGCNPGCKA  
SbBBI-2 SKGEEEGGAAR--AKGSW-PCDCK-GFC---Y--RS-FPPRCQCLDFSQ-RGCHPACKS  
SbBBI-4 -----EGSSW-PCCDNC-GIC---N--RM-IPPKRCNDISP-HGCHPKCNK  
SbBBI-7 -----EGSSW-PCCDNC-GVC---N--RK-LPPDCKCNDVSV-QGCHPECKN  
SbBBI-5 -----KGSSW-PCCDNC-GFC---N--RK-LPPDQCNDVSV-DGCHPECKN  
SbBBI-6 -----KGSSW-PCCDNC-GFC---D--RQ-LPPDQCDDVSV-DGCHPECKN  
ZmBBI-2a AIRLLPGSSGA--VGRPW-ECCDYV--TK---DPIIS-RPPRWRCNDVVD--KCSADCQE  
ZmBBI-3a DAIRLPSSFGA--GGRPW-NCCDSA--IK---D--AS-LPA-WRCNDVVD--KCSADCQD  
ZmBBI-1a ARARAKHQLRD--EERPWGECCLD--VC---V--KT-YPLTCSCFDRVE--RCSADCKE  
OsBBI-1a LPSDGAKSPKMPTEKRPW-KCCDDI--EE---QPASI-FPPFWRCNDELEPSQCAAQCEV  
OsBBI-2a LPIDGAVAARR--RTRPW-KCCDNIVRLP--E--RI-NPPFWRCNDELEPGQCFRQCEA  
OsBBI-7b -----QPT--TKRPW-KCCDSIVQLP--Q--RI-FPPFWRCNDELEPGKCTAACKS  
OsBBI-8b ----EWPERTT--KKRPW-KCCDNIRRLP--P--RI-HPPFWRCNDELKPGQCFAAACKA  
OsBBI-3a TDGGSQAQAPT--KKKPW-KCCDNIERLP--T--KT-NPPQWRCNDELEPSKVAQCEV  
OsBBI-6b -----DGLS--MERPW-KCCDNIRRLP--T--KP-DPPQWRCNDELEPSQCTAACKS  
OsBBI-5a NGAAGETDGNKQAKSRPW-ECCDNI--EM---SVLKI-YPPRWRCNDEVK--QCAAACEN  
OsBBI-8a -LPSEGDAPPQ--PAKPW-DCCDDI--EM---SPLKI-FPPLYRCNDEVK--QCSAACKE  
OsBBI-6a PSDGAKASRPR--AAKPW-DCCDNI--EI---SRLMI-YPPLYRCNDEVK--QCAAACKE  
OsBBI-7a LPSDGAEAAPP--PPKPW-DCCDNI--EM---SPLKI-FPPLYRCNDEVK--QCSAACKE  
BdBBI-3 RLPAHAGVASEGEEKPPW-KCCDLT--IC---A--RS-FPPTCRCADVVK--QCADGCKS  
BdBBI-5 MDAAGVASEGE--EKPW-KCCDLT--IC---A--RS-FPPTCRCADVVK--QCADGCKS  
ZmBBI-1b DKKAGGGDDDK--KKRPW-KCCDVP--IC---T--RS-WPPVRCADTVE--RCASTCQH  
BdBBI-1 ASSGEEDEYRE--SSRPW-SCCDRV--VN---P--RGVYPPILRCSEVE--RCAGACAE  
ZmBBI-2b -----W-DCCDFA--VC---T--RE-YIPNCRGVDVGE--SCPSNCKV  
ZmBBI-3b -----W-DCCDSV--AC---T--RD-YIPNCLDKVE--SCSSNCR  
BdBBI-2a SQDEVANQAGA--EKRPW-KCCDRA--MC---T--RS-IPPFCKCLDLLD--RC-PGCKD  
BdBBI-4a -----MAKASA--EKRPW-KCCNRA--RC---T--RS-IPPFCHDVE--RCSGACKD  
BdBBI-2b AEKKAIAAEEA--EKRPW-KCCDDT--LC---N--RA-APPTCRCLDVTVD--RCAASCRE  
OsBBI-4b -----GEEAV--RSRPW-KCCDDA--VC---T--RS-MPPTCSQDKVK--SCSGGCK  
BdBBI-4b KAVAADETAAK--KKRPW-KCCDRT--LC---T--KS-APPTCSCLDKVE--RCSGRCKR  
OsBBI-4a IRLPTDGGDEW--PSPPW-DCCDKL--KQ---SPLRI-WPPKYCLDEVD--HCAAACED  
BdBBI-6b AIPITTEPPPV--PERPW-ECCDAT--VC---T--KS-FPPTCRCLDVVD--RCAAACDR  
BdBBI-6a GLVIGQTAMAA--ATRPW-DCCDTP--LC---T--KS-FPPTCRCLDVVP--RCAAACES  
OsBBI-3b -----WGDCCTNT--TC---T--RS-IPPTCRCLDKVK--KCAAACKD  
OsBBI-8c -----WGDCDNT--TC---T--KS-IPPTCRCLDKVA--ACDGACKD  
OsBBI-2b -----EWPWGPCCDIA--VC---T--KS-LPPICHCSEVE--SCAAACGQ  
OsBBI-6c -----WGDCCKA--FC---N--KM-NPPTCRCLMDEVK--ECADACKD  
OsBBI-7c -----WGKCCDKA--FC---N--KM-NPPTCRCLMDEVN--KCAAACKD  
OsBBI-1b -----WGDCDMD--IC---S--RS-LPPICRCADVE--SCAAACKD  
OsBBI-5b -----WGDCCKA--FC---T--RS-LPPICHCADVEVA--SCAAACKE

\* \* \* \* \*

MtBBI-9 CVC--D-----SGLP----PTCRCED-----YIYS-----  
GmBBI-2 CIC--A-----LSYP----AQCFVD-----I--TDFCYEP-----  
GmBBI-4 CIC--A-----LSYP----AQCFVD-----I--TDFCYEP-----  
GmBBI-9 CMC--T-----RSQP----GQCRCLD-----T--NDFCYKP-----  
GmBBI-5 CAC--T-----RSMP----GQCRCLD-----T--TDFCYKP-----  
GmBBI-1 CAC--T-----RSMP----GQCRCLD-----T--TDFCYKP-----  
GmBBI-3 CAC--T-----RSMP----GQCRCLD-----T--TDFCYKP-----  
MtBBI-12 CDCIRD-----SESET----PSCYCAD-----VMFF-TCYDL-----  
MtBBI-1 CTC-----KQP----KRCTCDD-----YEQD-----  
GmBBI-8 CIC--Q-----RIWP----PRCRCFD-----E--TDTCYDK-----  
MtBBI-5 CRC--F-----ESLP----LKCTCLD-----I--TEFCYEP-----  
MtBBI-7 CRC--F-----ESFP----LKCDCLD-----I--TDFCYEP-----  
MtBBI-4 CIC--P-----GSSP----PQCYCDD-----LFQSRFCHKK-----  
MtBBI-2 CVC--K-----STIP----PQRCMD-----H--TNFCYEP-----  
GmBBI-7 CIC--T-----ASYP----PQCRCLD-----Q--TTFCYDK-----  
MtBBI-6 CAC--L-----PSPF----VLCRCVD-----I--TNFCYPP-----  
GmBBI-6 CLC-----IH----PQCRCLD-----T--TDFCYEP-----  
MtBBI-8 CVC--T-----KFIP----PQCRCHDVTFWQRGTIGWFRFGFVTEKSRHDPGGTWH  
GmBBI-12 CIC--N-----KKFP----RTCYCSD-----I--TNFCYDK-----  
MtBBI-11b CEC-----GWSS----PLCTCYD-----I--TDFCYKP-----  
GmBBI-10 CFC--D-----IPTFP----GLQCQID-----V--TNFCYEL-----  
GmBBI-11 CIC--T-----RSIP----PQCHCSD-----I--TNFCYEP-----  
MtBBI-3 CLC--T-----RSFP----PQCRCTD-----T--TDFCYEP-----  
MtBBI-11a CLC--T-----RSFP----PQCRCYD-----I--TNFCYPS-----  
MtBBI-10 CLC--T-----KSIP----PQCHCAD-----I--TDFCYPK-----  
OsBBI-9 CVKSSL-----SVSP----PVYQCMD-----RIPN-LCQRR-----  
SbBBI-1 CVKSSL-----SADP----PVYQCMD-----RVFN-FCQRR-----  
ZmBBI-4 CVKSSL-----SADP----PVYQCMD-----RVFN-FCQRR-----  
SbBBI-3 CVK-----SISD----GLYECKD-----RIVN-FCKRR-----  
SbBBI-2 CLKFTT-----GGIDEP----PIFRCAD-----ILVN-FCDRS-----  
SbBBI-4 CVT--NTLTAAGDDGTGP--VRAYCAD-----MITN-FCKRR-----  
SbBBI-7 CVK--VGAGIRPGGGHGP--VVTYRCDD-----ILTN-FCEHR-----  
SbBBI-5 CVK--VGAGIRPGGGHGP--VVTYRCDD-----ILTN-FCEQR-----  
SbBBI-6 CVM-----VGSFP----VVTYRCDD-----VLTN-FCEQR-----  
ZmBBI-2a CEE-----SLAG----DGFVCGD-----WIFSLLEPPV-----  
ZmBBI-3a CEA-----SPAG----DGFVCGD-----FILSLTEPPV-----

|          |                                                   |
|----------|---------------------------------------------------|
| ZmBBI-1a | CVE-----TED----SRHVCVD-----RYRG-DPGPR-----        |
| OsBBI-1a | CQD--Q-----EASP---GRLICGD-----VYWGADPGPF-----     |
| OsBBI-2a | CRDPPG-----RFPF---GRPLICDD-----VFWGDDPGTS-----    |
| OsBBI-7b | CRE-AP-----GFPF---GPLICED-----VYWGADPGPL-----     |
| OsBBI-8b | CRE-AP-----GFPF---GPLICDD-----VYWGADPGPF-----     |
| OsBBI-3a | CQE-AP-----GFPF---GPLICSD-----VYWGADPGPF-----     |
| OsBBI-6b | CRE-AP-----GFPF---GKLICED-----IYWGADPGPF-----     |
| OsBBI-5a | CLQLVP-----GAGGED---VVFVCDD-----WYPTTNP GPV-----  |
| OsBBI-8a | CVAAPA-----AGDSPCGGAALVCRD-----WYSTEDPGKP-----    |
| OsBBI-6a | CVE-----APGGDFNNGAFVCS D-----WFSTVDPGPK-----      |
| OsBBI-7a | CVE--A-----PGDFP---RGAFVCRD-----WYSTVDPGHM-----   |
| BdBBI-3  | CMG-----VP-----FGHICND-----WYTG-DPAQG-----        |
| BdBBI-5  | CMG-----VP-----FGHICND-----WYTG-DPAQG-----        |
| ZmBBI-1b | CEQ--V-----EEGFP---RRYRCLD-----THRG-DPGPR-----    |
| BdBBI-1  | CEE--V-----EESEP---RRYMCVD-----WYRGDDPGPR-----    |
| ZmBBI-2b | CEF--V-----ESDP---PGYRCLD-----VYWGADPGPR-----     |
| ZmBBI-3b | CEF--L-----YHSDP---PRFQCRD-----IFHG-YPGPK-----    |
| BdBBI-2a | CRAERE-----HEADP---ESFVCHD-----VYRG-APGPN-----    |
| BdBBI-4a | CRE--A-----EREDESDP---EGYVCHD-----MYHG-SPGPA----- |
| BdBBI-2b | CVA-----AGSDP---SRRVCKD-----RFHG-WPGPK-----       |
| OsBBI-4b | CVQ-----VESQP---PRFRCLD-----RYHG-FPGPK-----       |
| BdBBI-4b | CGP-----SESDP---SGLFCLD-----RYHG-WPGPK-----       |
| OsBBI-4a | CKR-----ADG---GGYVCRD-----WYWG VNP GPK-----       |
| BdBBI-6b | CEP-----AEDDP---ARRVCKD-----QYFG-DPGPT-----       |
| BdBBI-6a | CDP-----SESDP---SGCVCND-----WHRG-DPGPR-----       |
| OsBBI-3b | CKR--V-----KSSKP---PRYVQCD-----QFTG-QPGPK-----    |
| OsBBI-8c | CQP--V-----ASSSEP---PRFVCKD-----QFTG-QPGPK-----   |
| OsBBI-2b | CEM--V-----DSWSR---PLFVCRD-----SFTG-DPGPR-----    |
| OsBBI-6c | CQR--V-----ESSEP---PRYVCKD-----RFTG-HPGPV-----    |
| OsBBI-7c | CQR--V-----ESSEP---PRYVCKD-----RFTG-QPGPM-----    |
| OsBBI-1b | CQQ--LE---SSSSSEP---PRYVCHD-----WFRG-EPGFS-----   |
| OsBBI-5b | CDM--V-----NSSSEP---PRYICRD-----HFTG-EPGPM-----   |

\* \* \*

|           |                                          |
|-----------|------------------------------------------|
| MtBBI-9   | -----CNKCTNSNQ-----                      |
| GmBBI-2   | -----CKPSEDDKENY-----                    |
| GmBBI-4   | -----CKPSEDDKENY-----                    |
| GmBBI-9   | -----CKSRDD-----                         |
| GmBBI-5   | -----CKSSDEDDD-----                      |
| GmBBI-1   | -----CKSSDEDDD-----                      |
| GmBBI-3   | -----CKSSDEDDD-----                      |
| MtBBI-12  | -----CKFKL-----                          |
| MtBBI-1   | -----CNEC-----                           |
| GmBBI-8   | -----CTSTSQETAKAHDRYN-----               |
| MtBBI-5   | -----CNNSTIAN-----                       |
| MtBBI-7   | -----CNSTIAKSGCTCTHILRDGNRAVDALAKNG----- |
| MtBBI-4   | -----CN-----                             |
| MtBBI-2   | -----CNVIPMKSQLEGH-----                  |
| GmBBI-7   | -----CDSSEDKAHSE-----                    |
| MtBBI-6   | -----CN-----                             |
| GmBBI-6   | -----CNH-----                            |
| MtBBI-8   | DVVDKVVYCTIPAPSWHDWVETWHDAA Y-----       |
| GmBBI-12  | -----CNSTEAN-----                        |
| MtBBI-11b | -----CN-----                             |
| GmBBI-10  | -----CNSSETKAH-----                      |
| GmBBI-11  | -----CNSSETEAH-----                      |
| MtBBI-3   | -----CSYSSNGGSH-----                     |
| MtBBI-11a | -----CTMSPHKEIKERYKEIVT-----             |
| MtBBI-10  | -----CN-----                             |
| OsBBI-9   | -----CTAAAR-----                         |
| SbBBI-1   | -----CTAPAAA H-----                      |
| ZmBBI-4   | -----CTAAAAAAAH-----                     |
| SbBBI-3   | -----CTRPPAAAAAADA-----                  |
| SbBBI-2   | -----CTPPEAL-----                        |
| SbBBI-4   | -----CSPAPAAAFLGEVF-----                 |
| SbBBI-7   | -----CTAAPPEAAAFLGDGF-----               |
| SbBBI-5   | -----CTPAPAPVPEAGFLGGGF-----             |
| SbBBI-6   | -----CTPAPAPAPAPEAAFLGRGF-----           |
| ZmBBI-2a  | -----CTPRP-----                          |
| ZmBBI-3a  | -----CTPRP-----                          |
| ZmBBI-1a  | -----CHDEDGRSGGPADDDAGGQATPTAV-----      |
| OsBBI-1a  | -----CTPRP-----                          |
| OsBBI-2a  | -----CAPSS-----                          |
| OsBBI-7b  | -----CTPRP-----                          |
| OsBBI-8b  | -----CTPRP-----                          |
| OsBBI-3a  | -----CTPRP-----                          |
| OsBBI-6b  | -----CTPRP-----                          |
| OsBBI-5a  | -----CTPRP-----                          |
| OsBBI-8a  | -----CTPER-----                          |
| OsBBI-6a  | -----CTAAL-----                          |
| OsBBI-7a  | -----CTAPD-----                          |
| BdBBI-3   | -----ATNGN-----                          |
| BdBBI-5   | -----ATNGN-----                          |

|          |                                               |
|----------|-----------------------------------------------|
| ZmBBI-1b | -----CGDGEDDGGSEWSPTRLARGHRF-----             |
| BdBBI-1  | -----CTGVHHL-----                             |
| ZmBBI-2b | -----CTPFGSVKAISSAQLLAST-----                 |
| ZmBBI-3b | -----CRTWISTSN-----                           |
| BdBBI-2a | -----CSTNG-----                               |
| BdBBI-4a | -----CSSGT-----                               |
| BdBBI-2b | -----CSNNQ-----                               |
| OsBBI-4b | -----CHNQPA-----                              |
| BdBBI-4b | -----CTNKNDGL-----                            |
| OsBBI-4a | -----CTGGG-----                               |
| BdBBI-6b | -----CKSKHHDGPPAGGGSPSLAAVGGATTGLLMFSTVLLFTQT |
| BdBBI-6a | -----CPHHD-----                               |
| OsBBI-3b | -----CKHSCEN-----                             |
| OsBBI-8c | -----CTPCTQN-----                             |
| OsBBI-2b | -----CTPEMHN-----                             |
| OsBBI-6c | -----CKPRAEN-----                             |
| OsBBI-7c | -----CKPRAEN-----                             |
| OsBBI-1b | -----CTPDEHK-----                             |
| OsBBI-5b | -----CA-----                                  |

## F. I13 Pin-I.

PpPINI-1 -----MSRAALIGQSYVWYLNRLANSMHTAQEKMRARLSLTCECVQRRETEWPELLH  
 CsPINI-1 MPGAPQQANAGLDTTTTPSAGTGQSGLLALDGTGSGGGVYSGGDSISGQGASPVGGGSAG  
 PpPINI-2 -----  
 AtPINI-2 -----  
 OsPINI-2 -----  
 OsPINI-14 -----  
 OsPINI-1 -----  
 SbpPINI-22 -----  
 SbpPINI-21 -----  
 SbpPINI-23 -----  
 SbpPINI-3 -----  
 VvPINI-6 -----MADENQ  
 OsPINI-7 -----  
 SbpPINI-17 -----  
 OsPINI-13 -----  
 OsPINI-8 -----  
 SbpPINI-18 -----  
 SbpPINI-19 -----  
 SbpPINI-20 -----  
 OsPINI-3 -----  
 OsPINI-4 -----  
 SbpPINI-1 -----  
 SbpPINI-2 -----  
 SbpPINI-5 -----  
 SbpPINI-4 -----  
 OsPINI-6 -----  
 OsPINI-5 -----  
 OsPINI-15 -----  
 SbpPINI-6 -----  
 SbpPINI-15 -----  
 SbpPINI-16 -----  
 OsPINI-9 -----  
 OsPINI-11 -----  
 OsPINI-12 -----  
 OsPINI-10 -----  
 SbpPINI-11 -----  
 SbpPINI-12 -----  
 SbpPINI-10 -----  
 SbpPINI-9 -----  
 SbpPINI-7 -----  
 SbpPINI-8 -----  
 SbpPINI-14 -----  
 SbpPINI-13 -----  
 SmPINI-1 -----  
 MtPINI-1 -----  
 MtPINI-2 -----  
 MtPINI-3 -----  
 MtPINI-4 -----  
 AtPINI-1 -----  
 VvPINI-5 -----  
 AtPINI-4 -----  
 AtPINI-6 -----  
 AtPINI-5 -----  
 AtPINI-3 -----  
 FvPINI-1 -----  
 FvPINI-2 -----MRCAGKDFWPELLGAKAREARSKIESENDLVKVVIVKEGTFVTHDYRCDRVRVW  
 MtPINI-6 -----  
 VvPINI-3 -----  
 FvPINI-3 -----  
 FvPINI-4 -----  
 FvPINI-5 -----  
 MtPINI-8 -----  
 MtPINI-9 -----  
 MtPINI-5 -----  
 MtPINI-7 -----  
 VvPINI-4 -----  
 VvPINI-1 -----MRVTSLVTIDLLYS  
 VvPINI-2 -----  
  
 PpPINI-1 KNMSAVWALFWNTLDEADPDFSMFLQRPLPSEQNRPOHDE--ESDV-----WFYLTR  
 CsPINI-1 VGDVSGSTSFGNPGGLVFDGAGNIVSGVQSAFGDVPSTYT--GRQE-----W-----  
 PpPINI-2 -----MRTVACLIVVVLMAASLSGGNANH--GRIGIHSALDGRW-----  
 AtPINI-2 -----MNRNCPLYSPPCQRCSCAGITCQLFPG--IKVD-----W-----  
 OsPINI-2 -----MSWACRSLPNCNPN--GKSS-----W-----  
 OsPINI-14 -----MPAAGGDPQVAAAEQLRR--LKSS-----W-----  
 OsPINI-1 -----MGRAAAAGDGDS--LKTA-----W-----  
 SbpPINI-22 -----MGRFLTPTAAANDDGD--LKTS-----W-----  
 SbpPINI-21 -----MPAAGGGEDG--QKSS-----W-----  
 SbpPINI-23 -----MGRAAAAASAGGGDE--QKTS-----W-----

SbpINI-3 -----MAGADP--KRTS-----W-----  
 VvPINI-6 RTELPQERPQQSTTIPQEQPHQSTILLPGSVGHPSGVEVA--PKTT-----W-----  
 OsPINI-7 -----MGRAAAIVGGGEIVS--IKTA-----W-----  
 SbpINI-17 -----MSQN--TKTS-----W-----  
 OsPINI-13 -----MSS--DKSS-----W-----  
 OsPINI-8 -----MEK--KKVR-----W-----  
 SbpINI-18 -----MTKTFAPPKDHGE--KES-----W-----  
 SbpINI-19 -----MTKTFAPPKDHGEK--TKES-----W-----  
 SbpINI-20 -----LELTSDSRSSSRPAKAKTMTKTFAPPKDHG--EKES-----W-----  
 OsPINI-3 -----MS--QKSS-----W-----  
 OsPINI-4 -----MS--QKSS-----W-----  
 SbpINI-1 -----IT--GKSS-----W-----  
 SbpINI-2 -----MSVPIP--GKSS-----W-----  
 SbpINI-5 -----RMS-----W-----  
 SbpINI-4 -----MSS--QKTS-----W-----  
 OsPINI-6 -----MSSE--KKAS-----W-----  
 OsPINI-5 -----MSSSDSKPCGG--LKTE-----W-----  
 OsPINI-15 -----MSSGGKQDGAAAAGEEE--RKTS-----W-----  
 SbpINI-6 -----MATSGPNADGGAAAAAA--PKNS-----W-----  
 SbpINI-15 -----QKSCSFEEQ--KKT-----W-----  
 SbpINI-16 -----GVWS-----W-----  
 OsPINI-9 -----MAGVVRSAACSGGE--RKTS-----W-----  
 OsPINI-11 -----MTNLVDFDRVRCVVGEMSSGEE--GKTS-----W-----  
 OsPINI-12 -----MGGVRSAA--AKRS-----W-----  
 OsPINI-10 -----MNSTSHFVAISFFHHQLDQTRRGKMSSS--AKTS-----W-----  
 SbpINI-11 -----MAGGT--EKTS-----W-----  
 SbpINI-12 -----MSSSAEAERGA--KKQS-----W-----  
 SbpINI-10 -----MSSTAAVTTAPSGG--AKTS-----W-----  
 SbpINI-9 -----MSSTATAADCGG--AKTS-----W-----  
 SbpINI-7 -----MSSTAAPESGG--AKTS-----W-----  
 SbpINI-8 -----MSSTATAAPECGG--AKTS-----W-----  
 SbpINI-14 -----MSSIVMGATGDK--NKTS-----W-----  
 SbpINI-13 -----MSSIVMDVTSGE--KKT-----W-----  
 SmPINI-1 -----KTA-----W-----  
 MtPINI-1 -----MTEEQQGQGNPPHEQPNESSLRTYNQRLRRNP--TKTS-----W-----  
 MtPINI-2 -----MAESFKFICVILIFLCSFIAAKNIDGRNP--TRRN-----W-----  
 MtPINI-3 -----MAEEQQGQGNPPQEQPNEPLRPTYNQLLGTNP--TKTS-----W-----  
 MtPINI-4 -----MAEEKSGQGNPPQEQPRRNP--TRRN-----W-----  
 AtPINI-1 -----MSRYPWCWGSCEDEPECAIGKKYR-----W-----  
 VvPINI-5 -----MSGPHCF--GKQA-----W-----  
 AtPINI-4 -----MSDVCQNTAGEG--MKSS-----W-----  
 AtPINI-6 -----MATEWCSYIGSSFILNFYFSFFDI--GKNS-----W-----  
 AtPINI-5 -----MSTECF--RKNS-----W-----  
 AtPINI-3 -----MFVIVEKNPIQNSNHKNLQINTFIQEKMASICEDP--GKSS-----W-----  
 FvPINI-1 -----MATSSSTSTE--TKCS-----W-----  
 FvPINI-2 VDKHGTVTRVPTLSQTYKRFITESKTQDLKNAKMAGQCV--GKED-----W-----  
 MtPINI-6 -----MSSCK--GKKT-----W-----  
 VvPINI-3 -----MTTCPD--GKSS-----W-----  
 FvPINI-3 -----MSDQCQSEGKSS-----W-----  
 FvPINI-4 -----MSDQCE--GKDS-----W-----  
 FvPINI-5 -----MAGQSV--GKES-----W-----  
 MtPINI-8 -----MSDDECK--GKSS-----W-----  
 MtPINI-9 -----MSYDDECK--GKSS-----W-----  
 MtPINI-5 -----MSDECK--GKNS-----W-----  
 MtPINI-7 -----MSDECQ--GKSS-----W-----  
 VvPINI-4 -----MAFECR--GKTS-----W-----  
 VvPINI-1 TVHMLDSDFGSDFHMYLEYQEALVDRYLCQTRKRMAECE--GKSS-----W-----  
 VvPINI-2 -----MASECE--GKSS-----W-----

\*

PpPINI-1 DDIIEIPRHGRWHPNRPVCPGWPELKGVHYRDAVKIKDDMPGVLVD-YG--PLRRR-K-  
 CsPINI-1 -----PELVSTNALVAKALQGE-TGLNVL-LV--PKGSV-V-  
 PpPINI-2 -----PDLVGRDAEEAKTHILSERPYLNVR-IV--PTDMM-V-  
 AtPINI-2 -----PELNGVKGLEAKRIEHDNPKVVVV-II--PDDVA-V-  
 OsPINI-2 -----SELVGKKGSEAMAVILRERPDITRAILV--PQDAV-I-  
 OsPINI-14 -----PELVGWPEFYAALKLIDERPDVTYV-MF--RDGDD-LP  
 OsPINI-1 -----PELVGWVELNAAFQINRDRPDVHVA-FY--MVGTO-L-  
 SbpINI-22 -----PEVVGWVTLNASFKITADRPDVSTA-FY--SDTTP-L-  
 SbpINI-21 -----PEVVGWVMLNASDKITRDRPDVSTA-FY--SQTTT-L-  
 SbpINI-23 -----PEVVGWVTLNAAFKINSRDRPDVSTA-FY--SETTP-L-  
 SbpINI-3 -----PELVGIPALAAVMRINHDPVVE-VL--PLDMK-L-  
 VvPINI-6 -----PEVVGMTVEAERKIREDMRPVQFQ-VV--PNCF-V-  
 OsPINI-7 -----PEVVGWDGMSAVMKIHRDRADVVE-VH--TVGES-V-  
 SbpINI-17 -----PEVGLPAEVAKHKIQDDRDPVEVI-LV--RVGSV-V-  
 OsPINI-13 -----PEVVGLPAAEAKHILNDRPDVHV-VL--RVGSV-V-  
 OsPINI-8 -----AEVLGELAPLAVTQISNDRPDVAVE-VLLRDAAAV-V-  
 SbpINI-18 -----PEVKGWPATQAAQTAHERPDVAVE-VL--PPGSY-V-  
 SbpINI-19 -----PEVKGWPATQAAQTAHERPDVAVE-VL--PPGSY-V-  
 SbpINI-20 -----PEVKGWPATQAAQTAHERPDVAVE-VL--PPGSY-V-  
 OsPINI-3 -----PELVGLATLAATQIGKDRPDVAVE-VL--PPGAP-L-  
 OsPINI-4 -----PELVGLATLAATQIGKDRPDVAVE-VL--PPGAP-L-  
 SbpINI-1 -----PELVGVQATLAATAIAHDRPDVSV-VL--PPGSP-V-  
 SbpINI-2 -----PELVGVNATLAATAIAHDRPDVAVE-VL--PPGAP-V-

SbPINI-5 -----PEVVGWSAADAKAQIKSDRDPVTIE-VL--PWSTY-A-  
SbPINI-4 -----PEVVGWPATAAAVTQISSDRPDVAIE-VV--QVGTN-V-  
OsPINI-6 -----PEVVGWPATAAAVTQINGDRPDVSIIE-VI--PDGAT-V-  
OsPINI-5 -----PELVGLTIEQAKAKIKADRDLQVE-VL--PVGTI-I-  
OsPINI-15 -----PEVVGLPVEEAKKVILKDMPDADIV-VL--PAGSP-AG  
SbPINI-6 -----PELVGKSSEEAKKIKEDKPGADVQ-VV--PADAF-V-  
SbPINI-15 -----PEFVGLSITQAVPSILKDMPNAEIE-VL--ALGSP-M-  
SbPINI-16 -----PNIIIGFTMEDAMI IILRDKPDADIV-FL--PVGSP-VT  
OsPINI-9 -----PEVVGLSAEAEAKKVILKDMPDADIV-VL--PAGSP-V-  
OsPINI-11 -----PEVVGRLAEAEAKKVILKDMPDADIV-VV--PVGTP-V-  
OsPINI-12 -----PEVVGMTMEAEAKAAILKDKPDADIV-VL--PVGAP-M-  
OsPINI-10 -----PEVVGLSIEEAKKVILKDKPDADIV-VL--PFGTA-V-  
SbPINI-11 -----PEVVGLSVEKAKKTILKDKPDADII-VL--PVGTP-V-  
SbPINI-12 -----PEVVGLSVEEAKKVILKDKPDADIF-VL--PVGSP-V-  
SbPINI-10 -----PEVVGLSIEEAKKVILKDKPDADIV-VL--PVGSK-V-  
SbPINI-9 -----PEVVGKSVEEAKKVILKDKPDADIV-VL--PVGTI-V-  
SbPINI-7 -----PELVGLNVEEAKKVILKDKPDADIV-VL--PVGSP-V-  
SbPINI-8 -----PEVVGKSVEEAKKVILKDKPDADIV-VL--PVGSP-V-  
SbPINI-14 -----PEVVGMSINEATDIILKDMMLNAHIE-IL--PIGSI-V-  
SbPINI-13 -----PEVLGMSIKEATEIILKDMPNAYIQ-VL--PVGSP-V-  
SmPINI-1 -----PELVGKDAIYAREQILADNPKLEIH-IV--FYEACLV-  
MtPINI-1 -----PELVGVTVEEAKRKIKEEMSEVVKIE-VV--SPGSC-V-  
MtPINI-2 -----SELVGVTAEEAERKIKEEMNGVEIR-VV--PPGYF-V-  
MtPINI-3 -----PELVGVTAEEAERKIKEDI SGVEIQ-VV--PPDSF-V-  
MtPINI-4 -----SELVGVTAEEAERKIKEEMHGVEIR-VV--PPGY----  
AtPINI-1 -----PELVGKNGQLAKMTIERENPNVLA I-VL--RYGEK-R-  
VvPINI-5 -----PELLGEKAEVAKETIERENPSVRAR-FI--KQGHY-R-  
AtPINI-4 -----PELVGRRGEEVKEI IDRENTKVTA K-II--SENAV-V-  
AtPINI-6 -----PELLGTNGDYAASVIKGENSSLNVV-VV--SDGNY-V-  
AtPINI-5 -----PELTGTNGDYAAVVIERENPTVNAA-VI--LDGSP-V-  
AtPINI-3 -----PELLGAKGEDAKEVIERENPKMKAV-II--LDGTV-V-  
FvPINI-1 -----PELVGTKGEAAATIVKENPSVKAH-TV--NEGSF-V-  
FvPINI-2 -----PELLGAEGTVAKETIERENSTVKA E-IV--LEGTI-V-  
MtPINI-6 -----PELVGVNGEAAAQIIMSENSLVTAS-TL--PEDSV-F-  
VvPINI-3 -----PELVGVHGEAAAAI IERENLNVKAG-VV--KEGTL-V-  
FvPINI-3 -----PELLGAQGTDAKATIESENSSVTAV-IV--QEGSI-V-  
FvPINI-4 -----PELLGAQGTVAKATIESENASVKAV-IV--LEGTS-V-  
FvPINI-5 -----PELLGAEGTVAKEI IESENASVTAV-IV--LEGTP-V-  
MtPINI-8 -----PELVGVEGKVAEATI QRENASVKAI-IV--LEGSS-V-  
MtPINI-9 -----PELVGVEGKVAEATIERENPLVNAI-IV--PEGSA-V-  
MtPINI-5 -----PELVGVEGKVAEATI QSENPLVNAI-IV--PEGSF-V-  
MtPINI-7 -----PELVGVEGKVAEATI QRENPLVDAI-IV--PEGSS-V-  
VvPINI-4 -----PELLGVQKAVAKATVERENPYVTDVEIV--LEGTI-V-  
VvPINI-1 -----PELVGVQGEVAAETIKRENPHITTDIL--LEGTI-V-  
VvPINI-2 -----PELVGVQGEVAAETIKRENPHITTDIV--LEGTS-V-  
. : . : :

PpPINI-1 PKGT--QIN-RVVLYVDE--E--E----KVARI-PHVG-----  
CsPINI-1 TTDY--RAD-RIRIYFDPATY-----LVVQPRPSVG-----  
PpPINI-2 TMDY--NEN-RVRLFVDD--E--R----KVVKC-PTIG-----  
AtPINI-2 LAVN--CCN-RVIVRVPV-----NNCPNGPVSNF-PHIG-----  
OsPINI-2 TDDY--CCN-RVRILVDC--GDGGGDCGDASVTAV-PMIG-----  
OsPINI-14 PPEH--DPA-RVAIFVDG--D--I----RVSRT-PVVG-----  
OsPINI-1 PTDH--DDL-RVIVSDA--G--T----VVVRT-PVVG-----  
SbPINI-22 PTDY--NPK-RVIIIFDS--G--N----VVVRT-PVVGSTCTCTNGIGFLSESLTSG  
SbPINI-21 PTNY--DPN-RVIIIVGDN--G--S----VVVRT-PVIG-----  
SbPINI-23 PTDY--DPN-RVIIIVADG--G--S----VVVRT-PVIG-----  
SbPINI-3 SKGF--NPR-RVRVFYDR-PGGLAG----PRRQG-PRRR-----  
VvPINI-6 TMDF--NT--RVRLHVDS--E--G----KVSRA-PRIG-----  
OsPINI-7 PPGF--DGE-RVLVFLND--DNA-A----TVAQT-PVVG-----  
SbPINI-17 TDDF--NTM-RVRVFFDK--V--G----NVAEV-PKIG-----  
OsPINI-13 TTEV--DPK-RVRVFNND--S--A----TVAQV-PKI-----  
OsPINI-8 SPEF--NPK-RVRVFDN--N--F----IVVKV-PVIS-----  
SbPINI-18 IPGY--NAK-RVRVHIDD--N--G----NVSEV-PVIG-----  
SbPINI-19 IPGY--NGK-RVRVHIDD--S--G----NVSEI-PKIG-----  
SbPINI-20 IPGY--NGK-RVRVHIDD--S--G----NVSEI-PKIG-----  
OsPINI-3 TPDF--NDK-RVRVFMDD--N--G----IVFKI-PVIG-----  
OsPINI-4 TPDF--NDK-RVRVFMDD--N--G----IVFKI-PVIG-----  
SbPINI-1 IPDF--NPT-RVRVFINN--G--G----FVNQV-PVIG-----  
SbPINI-2 IPDY--NPL-RVRVFDN--N--N----LVSQV-PVIG-----  
SbPINI-5 PPKY--FNNLRVRYVDTSYA--G--G----SPVYV-PVVG-----  
SbPINI-4 APGY--NAL-RVRVYFDA--GNATG----PVVYV-PVVG-----  
OsPINI-6 PPGF--DAN-RVRVFNNA--GDAVG----PVMRT-PFVG-----  
OsPINI-5 LGVV--VPN-RVILWVDT-----VAEI-PKIG-----  
OsPINI-15 DQGLPPQPRPHLRRHRRR--HPHRLACLICLPSA-SCLS-----  
SbPINI-6 TLDY--RTG-RVRVFDN--D--D----KVARA-PQIG-----  
SbPINI-15 THDF--RPN-RVRIFVDT-----VAQT-PMVG-----  
SbPINI-16 TNDF--RPN-RVRIFLDT-----IVSP-PRVG-----  
OsPINI-9 TLDF--RSN-RVRIFVDT-----VAGT-PTIG-----  
OsPINI-11 TMDF--RPN-RVRIFVDT-----VAGT-PTIG-----  
OsPINI-12 TRDL--RPN-RVRIFGSA-----TVAET-PRVG-----  
OsPINI-10 PEDF--RFN-RVRIFVDT-----VAET-PRVG-----  
SbPINI-11 PKDF--QPN-RVRIFVDI-----VVET-PHVG-----

SbPINI-12 TRDF--RPN-RVRIFVDT-----VAET-PRVG-----  
SbPINI-10 TGDY--LPD-RVRVFVDT-----VAET-PHVG-----  
SbPINI-9 TADF--VPS-RVRIFVDT-----VAQT-PHIG-----  
SbPINI-7 TRDY--RPN-RVRIFVDI-----VAEA-PHVG-----  
SbPINI-8 TMDY--RTN-RVRIFVDT-----VAQT-PHVG-----  
SbPINI-14 TQDF--RLD-RVRIFVDI-----VAET-PIVG-----  
SbPINI-13 TLDI--RPD-RVRIFVDT-----VAKT-PTVG-----  
SmPINI-1 TADF--DKN-RVRIYTDC--S--N----RVVRT-PSIG-----  
MtPINI-1 TFDL--RYD-RVRLYVDE--F--N----NVFST-PKIG-----  
MtPINI-2 TADY--NTQ-RVRLYVDQ--S--N----KLIKT-PTIG-----  
MtPINI-3 TADF--RFK-RVRLYVDE--S--N----KVIRT-PIIG-----  
MtPINI-4 ---F--RFK-RVRLYVDQ--S--N----KLIKT-PTIG-----  
AtPINI-1 IENF--CCN-RVYVYVLS--N--G----QVADA-PMIG-----  
VvPINI-5 TMDY--RCD-RVWVWTEGQT--G--G----VVVEV-PKVG-----  
AtPINI-4 LAVV--ICD-RVYVVRVND--Q--G----IVTRT-PISLANLIVIIYIYIYIYICVVCVE  
AtPINI-6 TEDL--SCY-RVRVWVDE--I--R----IVVRN-PTAG-----  
AtPINI-5 TADF--RCD-RVRVFVDG--N--R----IVVKT-PKSG-----  
AtPINI-3 PEIF--ICS-RVYVWVND--C--G----IVVQI-PIIG-----  
FvPINI-1 TFDM--RRD-RVRVWIDE--R--G----IVTKA-PKIG-----  
FvPINI-2 PADLVRVCD-RVRVWVDT--C--G----IVTRV-PTIG-----  
MtPINI-6 TADF--RCD-RVRVFVDK--Q--D----VVTRV-PKIG-----  
VvPINI-3 TTDF--RCD-RVRVWVDS--Y--G----IVSMA-PKIG-----  
FvPINI-3 TQDI--RCD-RVRVWVDS--Y--G----KLEFD-GLAGEKWSGKLESAGVEARPHQ  
FvPINI-4 TDDF--RLD-RVRVWVNT--E--G----IVTSV-PKIG-----  
FvPINI-5 TRDF--RLD-RVRVWVNT--D--G----IVISI-PKIGHQRFAVHFAANSSTSSVMLI  
MtPINI-8 TDDL--RFD-RVRVWVDK--E--G----IVTQV-PTIG-----  
MtPINI-9 ILDF--RCD-RVWVWVDK--D--G----IVFKV-PTIG-----  
MtPINI-5 TADF--RCD-RVRVWVDK--D--G----IVYQV-PIIG-----  
MtPINI-7 PFDf--RCD-RVWVWINK--D--E----IVYQV-PTIG-----  
VvPINI-4 PADLVPVCT-RVRIWVDE--S--G----IVTRV-PVVG-----  
VvPINI-1 TQDF--YCT-RVRVWVDE--N--G----IVISV-PTIG-----  
VvPINI-2 TKDF--YCT-RVRVWVDE--N--G----IVISV-PTIG-----

∴

PpPINI-1 -----  
CsPINI-1 -----  
PpPINI-2 -----  
AtPINI-2 -----  
OsPINI-2 -----  
OsPINI-14 -----  
OsPINI-1 -----  
SbPINI-22 AAASLSGPPPTNGDAALSGPTADPVASDPSSSQHAAAQPDSTMESGTPISGLGGASS  
SbPINI-21 -----  
SbPINI-23 -----  
SbPINI-3 -----  
VvPINI-6 -----  
OsPINI-7 -----  
SbPINI-17 -----  
OsPINI-13 -----  
OsPINI-8 -----  
SbPINI-18 -----  
SbPINI-19 -----  
SbPINI-20 -----  
OsPINI-3 -----  
OsPINI-4 -----  
SbPINI-1 -----  
SbPINI-2 -----  
SbPINI-5 -----  
SbPINI-4 -----  
OsPINI-6 -----  
OsPINI-5 -----  
OsPINI-15 -----  
SbPINI-6 -----  
SbPINI-15 -----  
SbPINI-16 -----  
OsPINI-9 -----  
OsPINI-11 -----  
OsPINI-12 -----  
OsPINI-10 -----  
SbPINI-11 -----  
SbPINI-12 -----  
SbPINI-10 -----  
SbPINI-9 -----  
SbPINI-7 -----  
SbPINI-8 -----  
SbPINI-14 -----  
SbPINI-13 -----  
SmPINI-1 -----  
MtPINI-1 -----  
MtPINI-2 -----  
MtPINI-3 -----  
MtPINI-4 -----  
AtPINI-1 -----

|          |                          |
|----------|--------------------------|
| VvPINI-5 | -----                    |
| AtPINI-4 | SIMDLNM-----             |
| AtPINI-6 | -----                    |
| AtPINI-5 | -----                    |
| AtPINI-3 | -----                    |
| FvPINI-1 | -----                    |
| FvPINI-2 | -----                    |
| MtPINI-6 | -----                    |
| VvPINI-3 | -----                    |
| FvPINI-3 | RRTVANRRKSAP-----        |
| FvPINI-4 | -----                    |
| FvPINI-5 | ERNVSLKIEHYPWRPAIIG----- |
| MtPINI-8 | -----                    |
| MtPINI-9 | -----                    |
| MtPINI-5 | -----                    |
| MtPINI-7 | -----                    |
| VvPINI-4 | -----                    |
| VvPINI-1 | -----                    |
| VvPINI-2 | -----                    |





## H. I25 Cystatin.

VcCPI-1 -----M---KHYF-LIFCTLILFSS  
CrCPI-1 -----MA--KRVL-IALAAFVMLNA  
SbCPI-17 -----MKQSAAI VAVLALVAFLLATA  
OsCPI-18 -----MV--AIAL-FLLLVVAGAGA  
SbCPI-6 -----MRSL-IALAVVLVVVA  
OsCPI-17 -----MKSL-AAVLIVLAAAA  
OsCPI-14 -----MRQSSRLSI IAVVISVTLVAI  
SbCPI-8 -----MARPSVLVVLP IVLATLLATA  
OsCPI-13 -----MRPSSLSTVVL SVIFTAALLAVA  
SbCPI-18 -----MRSL LALLVTALVAVVVAFPD  
OsCPI-15 -----MRTSSLLVAAALVFVVVVAE  
OsCPI-16 -----MARSSPLFLLGAALAVVAVAAA  
SbCPI-7 -----MR---SSPV-VLPLLAALLV  
VvCPI-3 MNSTLGLLEKVDLSVHWKDKRMKPLFTFHCPWIRGGGARHL--LSSS-LVFYHVDPTVE  
FvCPI-11 -----MH--NPLY-LLVLFALLIG  
FvCPI-5 -----MAAAIRSMIGKVGNTRSVRNDVTSFPI SNPHLHLG  
AtCPI-2 -----MATMLKVSLVLSLLGFLVIAV  
FvCPI-4 -----MDHSGDSNPV-----  
FvCPI-10 -----M---SPHY-LIAIFALLFPL  
SbCPI-12 -----MRPGQKLLFKWHLVIFLIGHY  
SbCPI-16 -----MASST--MRTG-LLFVVVVAI  
SbCPI-19 -----MR---TSFLLAAAI CAVVAS  
OsCPI-11 -----MAR---HPGLLLILLA AVAAVA  
SbCPI-5 -----MR---TSHLVVMAATAIFIAA  
SbCPI-1 -----MMRALISMLIVAAAVVGLCSV  
SbCPI-2 -----MRTLISMLVVAAA VVGLCSV  
OsCPI-9 -----MRTSSLVLF AAVAVFGA ACTA  
SbCPI-4 -----MATPGHLLPLLLLVLATLAAAA  
OsCPI-7 -----MT---MRTSLLLA AVAVVAI  
OsCPI-6 -----MAMTTRTLLLA  
OsCPI-8 -----MARIPLLLALLLAVSA  
SbCPI-3 -----MATTR--ALLL-TTTAAALLLL  
FvCPI-7 -----M---HPQY-IFAVLVLLVPL  
FvCPI-9 -----M---LRPH-CLLVLLALLFP  
OsCPI-10 -----MATSPMLFLVSLLLVVAAT  
OsCPI-5 -----MASKLYAVAPLVVLLLLAPL  
OsCPI-4 -----MAAR---CPVG-VASVLLLVIVLV  
SbCPI-11 -----MDPR--ALGAGMLLAVLLMAAT  
MtCPI-2 -----MAMTLTIVITLLCIL  
FvCPI-3 -----MALIKSPAARIAAATVLM SLLFTM  
OsCPI-3 -----MLRRRGFCCCS---GAPA-AAAAALL-LLA  
SbCPI-13 -----MPR---CAVVVLF AAVLLAASA  
SmCPI-2 -----  
SmCPI-3 -----  
PpCPI-5 -----MAPNHKVS V-LLAAVCLFGIY  
SmCPI-1 -----  
SbCPI-15 -----MSLLRGVQRLALGVAAAAAARGR--LPLA-ALLRFRFSSAY  
SbCPI-20 -----  
SbCPI-14 -----MRIWLRGATTIRCKCYSC--SFPL-AVVPVVSPPPP  
AtCPI-1 -----  
OsCPI-2 -----MRASSLFAESVFTT SAAAGRRR--CPRL-AAVPVTLFFST  
PpCPI-4 -----  
PpCPI-1 -----  
PpCPI-2 -----  
PpCPI-3 -----  
MtCPI-1 -----  
OsCPI-1 -----MRKYRVAGL-VAALLVLHSLA  
SbCPI-10 -----MRKHR I---VPLV-AALLVLLALAV  
AtCPI-7 -----MDMRRASMC--MMLI-CVSLVLLSGFG  
MtCPI-12 -----  
FvCPI-1 MNSIQRPKQAEHSPTQFNLSLKLQNPNSSISIKSIKISHNPVKPKTHKATSSFAFIHHRF  
VvCPI-5 -----  
AtCPI-3 -----MES-KTFWI VTL LLLC  
VvCPI-2 -----  
VvCPI-4 -----RH--FPPS-AIHFRKRYTLL  
AtCPI-6 -----MM--RSRF-LLFIVFFSLSL  
OsCPI-12 -----MRVAATTRPASSA--AAPL-PL-FLLLAVAA  
SbCPI-9 -----MRVAATRLAAAPPIRFLFLVLLGSA  
MtCPI-19 -----MRA-----TIY--ILPF-LVFFFFFFFALF  
FvCPI-2 -----MATL-----  
FvCPI-12 -----MMRTQ--CFLL-ALFAFLVPLVA  
FvCPI-8 -----MKKHVFSLDLFAFLLVAGLFA  
AtCPI-4 -----MM--MKSL-ICLSLILPLV  
MtCPI-20 -----MR--LESM-VLVLVLLAFT  
MtCPI-14 -----MT--LQSP-VFILIVLLVLS  
MtCPI-16 -----MK--LQSL-VFILIVLLALS  
MtCPI-11 -----MR--FQSL-VLILAVLFASF  
MtCPI-7 -----MR--FQSL-ILILIVLFALA  
MtCPI-4 -----MR--FQSL-VLILVLLASA  
MtCPI-9 -----MR--FQSL-VFILVLLASV  
MtCPI-18 -----MR--FQFI-FLILVVLVSL

MtCPI-10 --MEGVFNKCNQQDDHHARRRHPTMWWISMRLVCPPLVGTQ---LNSVPILKLDNLVRKP  
 MtCPI-17 -----MR---FQSI-ILILFILFSSL  
 FvCPI-6 -----MRPFCLLAILAVLLPL  
 MtCPI-15 -----MKLQLFVLFVVLMSYA  
 MtCPI-21 -----MR---LQSV-VFLLGLFLATM  
 MtCPI-13 -----MR---LQWL-VLLVVLVLMVST  
 MtCPI-8 -----MKLYNVAIFVLFVLSVVSFTV  
 AtCPI-5 -----MTSKVVFL-LLSLVVVLLPL  
 VvCPI-1 -----MQPTTRLSELLFTALPDISIRENCEKSTTMAWGQNPLFLFLTAALLLNG  
 MtCPI-3 -----MR---FQYL-VIFLLVLLASA  
 MtCPI-6 -----MR---FQYL-VIFLLVLLASA  
 MtCPI-22 -----MRNPTLLLV-LLFVVVLFVSYA  
 MtCPI-5 -----MR---IQLL-VLFVVVLMASA

VcCPI-1 AWV-----KAT-----ADTG  
 CrCPI-1 ATA-----TI-----  
 SbCPI-17 LTV-----VVA-----  
 OsCPI-18 GAQ-----GGDA-----GSLP  
 SbCPI-6 GAA-----SAK-----  
 OsCPI-17 AVA-----ATA-----  
 OsCPI-14 TNN-----ADV-----ALASSLPP  
 SbCPI-8 NAQDYTAPTSPFLPDTPTPPPPPPPESSSTAPPPASQPPPAASSSPPPSPPPPAYSSP  
 OsCPI-13 KAD-----GGG-----VTAA  
 SbCPI-18 GAD-----AVS-----  
 OsCPI-15 TLP-----  
 OsCPI-16 TLP-----AAT-----  
 SbCPI-7 ASS-----SAQ-----  
 VvCPI-3 RNQ-----TGSYGKAFMEYEKDVSKENREKIEKWRAAL  
 FvCPI-11 GNT-----QPI-----NLDG  
 FvCPI-5 YSS-----RHPLDLFPVVHHPNQRLLPKKSEPDSPSI  
 AtCPI-2 VTP-----SAA-----NPF  
 FvCPI-4 -----  
 FvCPI-10 LTT-----AVD-----NIGDYT  
 SbCPI-12 STA-----NQNLHGLATTKPAMRAAVLLGLVGLIAIVAIHIVAMAT  
 SbCPI-16 AFA-----TST-----  
 SbCPI-19 VVS-----  
 OsCPI-11 TTS-----RAQ-----  
 SbCPI-5 TTP-----AMA-----  
 SbCPI-1 APA-----ASA-----REA  
 SbCPI-2 APA-----ASA-----RGEP  
 OsCPI-9 AAG-----DES-----  
 SbCPI-4 FAV-----APV-----PGPAALG  
 OsCPI-7 VAG-----ATAA-----  
 OsCPI-6 AVC-----AAAA-----  
 OsCPI-8 AAA-----AQV-----GGNR  
 SbCPI-3 AGG-----GGA-----AA  
 FvCPI-7 VVI-----VSV-----  
 FvCPI-9 ILT-----AAA-----  
 OsCPI-10 GDE-----ASP-----SNAAAP  
 OsCPI-5 SSA-----RLA-----AAAAADDDGQWPAGG  
 OsCPI-4 TVA-----SAASGARS-----GGGGGGGIRELRGGG  
 SbCPI-11 AAA-----SAR-----PDDDDVAGSGAGAGG  
 MtCPI-2 STA-----SCG-----  
 FvCPI-3 SHG-----YGG-----  
 OsCPI-3 VAA-----AAP-----RAAGFHLGGDES  
 SbCPI-13 AAV-----SGF-----HLGG  
 SmCPI-2 -----MTT-----  
 SmCPI-3 -----MTT-----  
 PpCPI-5 LVG-----AQA-----  
 SmCPI-1 -----  
 SbCPI-15 YYP-----TSA-----AAARSFLATGSRML  
 SbCPI-20 -----  
 SbCPI-14 LPP-----GSR-----RRTASSAMAEHSGR  
 AtCPI-1 -----MADQQAGT--  
 OsCPI-2 GRG-----SPA-----MAEEAQPRGVKV--  
 PpCPI-4 -----  
 PpCPI-1 -----  
 PpCPI-2 -----  
 PpCPI-3 -----  
 MtCPI-1 -----MA--  
 OsCPI-1 TPS-----AQA-----EAHRAGGEGEEKMSS  
 SbCPI-10 SST-----R-----NRNAQEGEESMA--  
 AtCPI-7 QFV-----ICS-----EKGTYNDNVVKM--  
 MtCPI-12 -----MA--  
 FvCPI-1 QSL-----SLS-----IQLPSSLTLFYFSPE  
 VvCPI-5 -----MA--  
 AtCPI-3 GTI-----QLA-----ICRSEEKSTKTM--  
 VvCPI-2 -----MN--  
 VvCPI-4 LEG-----ECR-----SPKVLRTVPRISA--  
 AtCPI-6 FIS-----SLI-----ASDLGFCNEEMA--  
 OsCPI-12 AAA-----ALF-----LVGSA-SLAMAGH--  
 SbCPI-9 IGA-----AMA-----

MtCPI-19 IVL-----ESS-----GDCSDFDHAQMAT--  
 FvCPI-2 -----  
 FvCPI-12 SAF-----RGP-----S-ED-----  
 FvCPI-8 SLS-----PLL-----LATP  
 AtCPI-4 SVV-----EGL-----  
 MtCPI-20 ATK-----QAI-----  
 MtCPI-14 ATN-----QAL-----  
 MtCPI-16 IIN-----QAI-----  
 MtCPI-11 ATN-----QAI-----  
 MtCPI-7 TTN-----QAT-----  
 MtCPI-4 STN-----QAD-----  
 MtCPI-9 ATN-----QAD-----  
 MtCPI-18 ASN-----QAK-----  
 MtCPI-10 RPN-----HEI-----  
 MtCPI-17 ATN-----QAL-----  
 FvCPI-6 AAA-----  
 MtCPI-15 DAR-----KQP-----  
 MtCPI-21 SVR-----NQA-----  
 MtCPI-13 TAT-----KQL-----  
 MtCPI-8 SDG-----KDA-----  
 AtCPI-5 YAS-----AAA-----  
 VvCPI-1 GFA-----ART-----  
 MtCPI-3 -AR-----NQA-----  
 MtCPI-6 -AR-----NQA-----  
 MtCPI-22 AAR-----NQF-----  
 MtCPI-5 IAR-----MET-----

VcCPI-1 DQHHGLGA-----VV-----  
 CrCPI-1 ----VGG-----SS-----  
 SbCPI-17 -DPAPPS-Y-----TK-----  
 OsCPI-18 PAPAATGE-W-----VP-----  
 SbCPI-6 -----F-----VDPP-----  
 OsCPI-17 ----SASE-F-----KQTP-----  
 OsCPI-14 APPAAAAG-W-----TA-----  
 SbCPI-8 PPPPPASNW-----TP-----  
 OsCPI-13 AAAPPPAA-W-----TA-----  
 SbCPI-18 -----W-----TP-----  
 OsCPI-15 ---AAEATY-----RP-----  
 OsCPI-16 ---EAAG-W-----AP-----  
 SbCPI-7 -----AA-W-----VP-----  
 VvCPI-3 KEAINLSG-WHLHNQRGSIRIPVSFQSIPTHHHHHHHTKTHPKPTSSTSLMAHTQAIRW  
 FvCPI-11 ---PDTGG-Y-----QR-----  
 FvCPI-5 PEMPYLGT-----GP-----  
 AtCPI-2 RKSIVLGG-K-----SG-----  
 FvCPI-4 ---NDSA-W-----FP-----  
 FvCPI-10 ---LIGA-W-----KP-----  
 SbCPI-12 PAMAQTFGVW-----YP-----  
 SbCPI-16 ---MAET-----TP-----  
 SbCPI-19 ---ADSQG-W-----FP-----  
 OsCPI-11 ---WVGG-W-----NV-----  
 SbCPI-5 EIGRLQGGFY-----QP-----  
 SbCPI-1 PLPENVGR-W-----TP-----  
 SbCPI-2 PVPQAVGG-W-----KP-----  
 OsCPI-9 -----W-----KT-----  
 SbCPI-4 GGGPLLGG-W-----NP-----  
 OsCPI-7 ---TVGS-W-----EP-----  
 OsCPI-6 ---LPRG-W-----SP-----  
 OsCPI-8 GHGPLVGG-W-----SP-----  
 SbCPI-3 ARGPLAGG-W-----SP-----  
 FvCPI-7 ---AAEGG-W-----IP-----  
 FvCPI-9 ---DGPTF-W-----VP-----  
 OsCPI-10 AAPVLVGG-R-----TE-----  
 OsCPI-5 GRGRKVGG-R-----TD-----  
 OsCPI-4 -AGRRVGG-R-----TE-----  
 SbCPI-11 IRQPASDG-Y--RGRKVGARTE-----  
 MtCPI-2 --RVIVGA-R-----TE-----  
 FvCPI-3 ---LVGG-R-----RP-----  
 OsCPI-3 ---VLVRG-M-----LA-----  
 SbCPI-13 DESGLVRGVL-----AA-----  
 SmCPI-2 ---LVGA-P-----KP-----  
 SmCPI-3 ---LVGA-P-----KP-----  
 PpCPI-5 ---MSVGG-P-----KD-----  
 SmCPI-1 --SSLVGG-W-----SA-----  
 SbCPI-15 APDLLCGG-V-----VDAP-----  
 SbCPI-20 ---MVDD-V-----QDTP-----  
 SbCPI-14 RVGMV-GD-V-----RDAP-----  
 AtCPI-1 ---IV-GG-V-----RDID-----  
 OsCPI-2 ---GG-I-----HDAP-----  
 PpCPI-4 ---MLSGG-K-----QEV-----  
 PpCPI-1 ---ML-GG-K-----KEVD-----  
 PpCPI-2 ---MLGG-K-----KEVD-----  
 PpCPI-3 ---MLGG-K-----KEVD-----

MtCPI-1 ---TV-GG-V-----RDVS-----  
OsCPI-1 DGGPVLGG-V-----EP-----  
SbCPI-10 ---LA-GG-I-----KDVP-----  
AtCPI-7 ---KL-GG-F-----SDSK-----  
MtCPI-12 ---AL-GG-S-----TEVE-----  
FvCPI-1 KMAAVLGGVH-----ES-----  
VvCPI-5 ---TV-GG-I-----HDS-----  
AtCPI-3 ---ML-GG-V-----HDLR-----  
VvCPI-2 ---LL-GG-V-----RDCG-----  
VvCPI-4 ---LL-DL-L-----LKNT-----  
AtCPI-6 ---LV-GG-V-----GDVP-----  
OsCPI-12 ---VL-GG-A-----HDAP-----  
SbCPI-9 ---GHVLGG-V-----KENP-----  
MtCPI-19 ---PL-GG-I-----QDSP-----  
FvCPI-2 ---GG-I-----GDSP-----  
FvCPI-12 ---QIVGA-W-----EI-----  
FvCPI-8 GDHPNYGA-Y-----RP-----  
AtCPI-4 ---GGGG-G-----LGSRKP-----  
MtCPI-20 ---PIGN-L-----SP-----  
MtCPI-14 ---TFID-W-----SP-----  
MtCPI-16 ---TSSD-W-----GP-----  
MtCPI-11 ---PPNN-L-----RR-----  
MtCPI-7 -----F-----  
MtCPI-4 -----F-----  
MtCPI-9 -----F-----  
MtCPI-18 ---RPIQ-S-----SP-----  
MtCPI-10 ---SIH-CFYSLCFICLIDR-----  
MtCPI-17 ---GIS-T-----R-----  
FvCPI-6 ---VPGG-W-----SP-----  
MtCPI-15 ---LSDG-W-----SR-----  
MtCPI-21 ---IAGG-W-----EP-----  
MtCPI-13 ---IVRG-W-----DP-----  
MtCPI-8 ---LVGG-W-----TP-----  
AtCPI-5 ---RVGG-W-----SP-----  
VvCPI-1 ---EALAGG-W-----RP-----  
MtCPI-3 ---KPGG-Y-----SP-----  
MtCPI-6 ---IPGG-Y-----SP-----  
MtCPI-22 ---APGG-W-----SP-----  
MtCPI-5 ---SAGG-W-----SP-----

VcCPI-1 --EADV--D-N-PAIRDAADYVTRTANTNN-----CNGLCASLKRTGKLLLEILS  
CrCPI-1 --KAAV--S-D-PDVVHAANFVSSANTNA-----CSGLCAGLQKEGELKLVKVLVS  
SbCPI-17 --QEDV--S-S-DFIKQVGFVAVNVYR-----LAHM-----IPMNYLSTSK  
OsCPI-18 --IGGDVIRG-D-GLYRQVARFALVVRMLAF-----GAAE-----GELTLVEVVA  
SbCPI-6 --DSDV--PAG-TRPPQIGRFVAVLVYN-----LNRG-----AKLKYAGVSN  
OsCPI-17 --VADM--PVD-PRGPLLGRFAVLVYS-----LNRN-----RRLTYAGVSL  
OsCPI-14 --VANV--N-D-KSIQQAGQFALVIYR-----QITR-----LYFLRYVNVVS  
SbCPI-8 --VANV--K-D-PKIQQVAQFAVRIHA-----LSST-----ELNMQLQIVVS  
OsCPI-13 --VANV--N-D-KSIQQVQSAVRVYR-----LSTN-----KTYLRFVNVVS  
SbCPI-18 --IANP--G-T-TLVKQVGNFCVIVYSNSD-----RRRH-----LPLQLVIVVR  
OsCPI-15 --IGNT--S-N-LVILQVGRFVSVLVYD-----LSHR-----KSLVFSVVS  
OsCPI-16 --VADV--Q-E-LVIQQVGRFAVLVYS-----LAHH-----TDLAYVGVAR  
SbCPI-7 --VLDV--N-E-LVIKQVAQFAVLVYR-----LAHH-----RDLAYVGVVR  
VvCPI-3 TKVQDV--E-E-KHIQELGEYAVEEQN-----KKEN-----WNLEFEKVSM  
FvCPI-11 --IPNP--ATD-PDVKEIVFAISEIN-----FQSL-----KNLVLGTIVR  
FvCPI-5 --INDS--SRDCPRVIVINAHFALEEFN-----KQKN-----AQLQFVRVVK  
AtCPI-2 --VPNI--RTN-REIQQLGRYCVQFN-QQAQNEQGNIGSIAKTDTAISNPLQFSRVVS  
FvCPI-4 --LKNV--S-D-PRVTEIANYAVDVYT-----RQNO-----KHLIFQKVIK  
FvCPI-10 --LKSI--S-D-PHVTEIANYAVDAYT-----RQNO-----KHLIFQKVIK  
SbCPI-12 --V-DL--S-E-GHVQYIGRWAVAEHV-----KQAK-----DGLKFDKVVG  
SbCPI-16 --I-NV--N-D-PVYQKIARWAVTEHV-----MLAN-----DGLKFNKLVVS  
SbCPI-19 --LPDI--D-A-PKVQQLGRWAVTEHD-----KKAN-----DKVKFNRVVS  
OsCPI-11 --IEDV--AGN-NQIQRVGAVGKHN-----QLGT-----NDRLQFVRVVA  
SbCPI-5 --IVNI--N-D-PHVQEVGRWAVSEHV-----KKAN-----DGLKFSRVVS  
SbCPI-1 --ITDV--N-D-PEIQEIGRWAVSEHD-----AAAS-----DSLVSFQVVR  
SbCPI-2 --I-NV--N-D-PHIQELGRWAVSEHG-----KQAS-----DRLVFGKVVS  
OsCPI-9 --IDAN--D-RHVQDVALWVAETD-----WASAT-----GGLTLNTVDG  
SbCPI-4 --IPDV--G-D-KHIQELGGWALGQAK-----YQKL-----AANALRFRRVVR  
OsCPI-7 --V-DI--N-D-PHVQELGRWAVAEED--R-----GVAA-----GGLTFERVTD  
OsCPI-6 --IKNI--D-D-PHIQELGRWAVTEHN--R-----VSPS-----DELTFHRVTG  
SbCPI-8 --ITDV--G-D-PHIQELGGWAVTEHV-----SLSS-----DGLRFRRVVS  
SbCPI-3 --IRNV--S-E-PHIQELGGWAVTEHV-----RVAN-----DGLRFGEVTS  
FvCPI-7 --L-SP--S-D-PRAITVAQFAITEYN-----KNTT-----QKLVYQSLVS  
FvCPI-9 --IKNT--S-D-PVVVEVQGFVAVSEYD-----KNTT-----KKLIFEKVVS  
OsCPI-10 --IRDV--GSN-KAVQSLGRFAVAEHNRLRHGGSGGPADPV-----PVKLAFARVVE  
OsCPI-5 --VEDV--EGN-REVQELGLFCVVEHN-----RRGG--SATRGRGLVFSRVVA  
OsCPI-4 --VRDV--EGD-REVQELGRFSVEEHN--R-----RRRSRDCG-----DVRLEFGRVVA  
SbCPI-11 --IRDV--ESD-GEVQELGRFSVAEYNRQLR-----GDGG-----GRLEFGRVVA  
MtCPI-2 --ISDV--GTN-KEVQELGKFAVKEYN-----YKQGLNNGGGEGELKFVEVVE  
FvCPI-3 --VEDV--KTN-KEVQELGRFSVAEYNRMQ-----RQSL--RSNGGGELQFREVVVE  
OsCPI-3 --AIRR--E-Q-AEAEDAARFAVAEYN-----KNQG-----AELEFARIVK  
SbCPI-13 --LRER-----AEAEDAARFAVAHNN-----KNQG-----AALEFTRVLK

SmCPI-2 --LKEA--N-S-LEAEEHAKFAVEEHN--R-----QNPE-----ANLCFKRVVS  
SmCPI-3 --LKEA--N-S-LEAEEHAKFAVEEHN-----RQVQ-----ANLCFKRVVS  
PpCPI-5 --ISNF--PNS-VEIDELANFAVDQYK-SR-----QNSI-----AVITFSKVLS  
SmCPI-1 --IDPK----D-PNVVTLAKFAVHEHN-KK-----LSGH-----GTLLYSKLVE  
SbCPI-15 --G-HE--M-H-PDAIELARFAVAEHN-SK-----TNAA-----LEFVRLVK  
SbCPI-20 --AGCE--K-G-LEAIKLVCFNAEHN-----GKTN-----AILKFVRSVK  
SbCPI-14 --EGHE--N-D-LEAIELARFAVDEHN-SK-----TNAM-----LEFERLVK  
AtCPI-1 --A-NA--N-D-LQVESLARFAVDEHN-KN-----ENLT-----LEYKRLLG  
OsCPI-2 --AGRE--N-D-LTTVELARFAVAEHN-SK-----ANAM-----LELERVVK  
PpCPI-4 --LQNS--N-N-LEIDEAAKFAVAEHN-DR-----ENSL-----EKLTFKVVVS  
PpCPI-1 --VQDT--N-S-LEIDELANFAVAEHL-KS-----QNSL-----EGMTFSKVVS  
PpCPI-2 --VQDT--N-S-LEIDELANFAVSEHN-AR-----QNSL-----EKMNFSKVVS  
PpCPI-3 --VQDT--N-S-LEIDELANFAVSEHN-NR-----QNSL-----EKMNLSKVVIS  
MtCPI-1 --G-NQ--N-S-LAIDGLARFAVEEHN-KK-----QNAL-----LEFSRVIS  
OsCPI-1 --VGNE--N-D-LHLVDLARFAVTEHN-----KKAN-----SLLFEKLVVS  
SbCPI-10 --A-NE--N-D-LHLQELARFAVEEHN-KK-----ANAL-----LGYEKLVK  
AtCPI-7 --NDWN--G-G-KEIDIALFAVQEHN-RR-----ENAV-----LELARVLK  
MtCPI-12 --Y-TQ--N-S-VEIDNLAIFAVQEHN-IK-----QNAV-----LEFVRLVN  
FvCPI-1 --QGSQ--N-S-LETDELARFAVQEHN-----KKEN-----ALLEFVRLVK  
VvCPI-5 --G-SQ--N-A-LEIENLARFAVDEHN-KK-----QNTL-----LEFNGVVK  
AtCPI-3 --G-NQ--N-S-GEIESLARFAIQEHN-KQ-----QNKI-----LEFKKIVK  
VvCPI-2 --G-IQ--N-S-AEIESIARFAVQEHN-KN-----QNAL-----LEFAKVLK  
VvCPI-4 --TRRS--K-K-CKVEDMRRIMILQOQ-IAFVEGWYWENAL-----LEFARVVK  
AtCPI-6 --A-NQ--N-S-GEVESLARFAVDEHN-KK-----ENAL-----LEFARVVK  
OsCPI-12 --S-AA--N-S-VETDALARFAVDEHN-KR-----ENAL-----LEFVRVVE  
SbCPI-9 --AAAN----S-AESDGLGRFAVDEHN-----KREN-----ALLEFVRVVE  
MtCPI-19 --S-SE--N-S-LEIESLARFAVDQHN-AK-----QNSL-----LEFARVVK  
FvCPI-2 --AGSE--N-S-LETEALGRFAVDHNN-----KQKN-----GMLEFVRVVK  
FvCPI-12 --IKDI--G-D-PHVQEIAKWGVSEYN--R-----QSHK-----GL-VFQRVIS  
FvCPI-8 --IEDI--H-N-PHVVEIAEFVAVSELN-----KQFQ-----KKLVFQSVVR  
AtCPI-4 --IKNV--S-D-PDVVAVAKYAIIEHN--K-----ESKE-----KL-VFVKVVE  
MtCPI-20 --INNI--N-D-PKVIDVANFAVKEYNRR-----RKPE-----EKLRLWKVIK  
MtCPI-14 --V-DI--N-D-PHVVEIAKFAVTEFN--K-----RITI-----EKLTFENVIH  
MtCPI-16 --V-DI--N-D-PHVVDIAKFAVTAYN--K-----RNTV-----GKLAFEKVIS  
MtCPI-11 --I-NI--N-D-PRVIEMAGFAIEHN--N-----QITG-----AKLRFKLVLD  
MtCPI-7 --V-DI--N-D-SEVIKVAFAVTEYN--K-----QHTK-----AKLKFEKVIN  
MtCPI-4 --I-DV--N-D-PHVMKVTT-----QHTK-----FEKVIS  
MtCPI-9 --V-DV--N-D-PHVIEIATFAVTEYN--N-----QHTE-----AKLVFEKVMS  
MtCPI-18 --V-NI--N-D-PYVINITTFAVIEYN--K-----QNTK-----AKLVFEKLLN  
MtCPI-10 --V-DI--N-D-PHVIDTGNFAVTKHN--K-----QNNE-----TKLIFEKVID  
MtCPI-17 --V-NI--N-D-PHVIDTGNF-----KVIN  
FvCPI-6 --IKDI--N-D-PHVKEIAEFVAVSEYN-----KESG-----KKLELQRVVK  
MtCPI-15 --IKDI--N-N-PHVIDIANFAVIEFN-----KQTG-----AKLKFEKVIK  
MtCPI-21 --IKNI--N-D-PHVIDIANFAVTEHD--K-----QAGL-----NL-KLEKVIS  
MtCPI-13 --I-NI--Y-E-PYMIDLCNF-----KIIK  
MtCPI-8 --IKNV--K-D-PQVVEIAKFAVTEYG-----KQSG-----SKLSFVKVIK  
AtCPI-5 --ISNV--T-D-PQVVEIGEFVAVSEYN-----KRSE-----SGLKFETVVS  
VvCPI-1 --IKNI--S-D-PRVQEIGEFVAVTEHN-----KQAT-----ESLKFQSVVS  
MtCPI-3 --IKNL--N-D-PHVIEIANFAVTEYG--K-----QQRF-----YS-KLDKIIK  
MtCPI-6 --IKNL--N-D-HHLEIANFAVTEYG--K-----QQGI-----KQIKLEKIK  
MtCPI-22 --IDDI--N-D-PHVTEIANFAVTEYD-----RRSG-----AKLKFEKVIN  
MtCPI-5 --IKDI--N-D-PHVIVIANFAVTEYN-----KHTG-----ANLKLKLIK

VcCPI-1 AKTQ--VV--AGI--LYKMELLL-----E--D--EK--GQOV-LFTCSVWNR-----  
CrCPI-1 ASTQ--VV--AGV--NVHLELLM-----A--D--DT--GKQT-VVTSTVWSR-----  
SbCPI-17 CWSS--PA--GGGANNYWMVLSA-----T--N--YT--GTAG-SYVSTVWGI-----  
OsCPI-18 GSVQAAG--AGN--NYRLLLR-----A--GGVG--TYEAVVWGV-----  
SbCPI-6 SERHP--HR--GGV--RYKMVVTA-----A--D--AS--GATA-QYQVLAWGI-----  
OsCPI-17 VDQHPDK--GGV--RYQMVVTA-----A--DAGG--GAAS-PYRAVVWGI-----  
OsCPI-14 GQTQP--YN--GGY--NYRLVTV-----Y--G--GP--NWKTTLYDADVWGI-----  
SbCPI-8 GETQP--CN--GGY--NYRLLITV-----S-----G--GKNT-QYEAFLVWGI-----  
OsCPI-13 GQTQP--CN--GGY--NYRLLVTV-----A-----GP--GATTARYDALMWGI-----  
SbCPI-18 GETQPAAV--GNGISDYRLVNLV-----KNTDT--GSTA-LYQCVRGK-----  
OsCPI-15 GETEAAVG--GGT--NYRLVILA-----E--TTPG--GSKA-KFQCVRVWGV-----  
OsCPI-16 GETEAAAGGAGGT--NYRLAVAV-----TKPD-----GSAA-QYECLVWGV-----  
SbCPI-7 GQTEQAVG--GGT--NFRLVVVA-----ARPD--DG--GSTA-QYDCLVWGV-----  
VvCPI-3 GWFQ--HL--AGN--IYKHLHIKA-----D--LA--GTSG-DYEAIWVKK-----  
FvCPI-11 AELQ--MV--EGL--NYHLVIEV-----R--GPERH--NTTE-EYEFTVFR-----  
FvCPI-5 AYNQ--EC--GGAFNHLMLTLEA-----I--D--AN--NVIQ-IYQAIQVQF-----  
AtCPI-2 AQKQ--VV--AGL--KYYLRIEV-----T--Q--PN--GSTR-MFDSVVVIQ-----  
FvCPI-4 GYYQ--IE--SGT--LYKLVIRV-----K--DENVH--FPTA-EYLAIVLSKGEQWR-----  
FvCPI-10 GYYQ--IE--SGI--LYKLVIRV-----K--DENVH--FPTA-EYQAVVLSN-----  
SbCPI-12 GEMM--MS--IGI--DFRLVIDA-----SSTSD--GKHA-NYEAVVHER-----  
SbCPI-16 GEVY--VS--LGY--LYHLIIDA-----S--D--RD--GKDA-RYTAVVVRQSTLGGEE-----  
SbCPI-19 GEETLDPE-LVGI--KYHLVIDA-----S--D--GS--GQHR-KYEAVLGE-----  
OsCPI-11 AEEQ--VV--QGS--NYLVVIDA-----A--S--SR--KKTRELYVAVVADL-----  
SbCPI-5 GQYQ--VV--EGF--NYRLIIDA-----T--D--SH--GKVA-KYEAVVWEK-----  
SbCPI-1 GEEQ--VV--AGT--NYKLVIEA-----T--KGAG--GKIA-TYGAVVYEK-----  
SbCPI-2 GEEQ--IV--AGT--KYKLVIIQA-----TRAGA--GGNSATYGAVVYEK-----  
OsCPI-9 AEKR--FE--AGV--NYRRLTLEA-----S--S--RV--VAKYLRFAVVYEE-----  
SbCPI-4 GEEQ--VV--SGM--RYRLYVDA-----A--D--RA--GRSV-TYVAVIYEQ-----  
OsCPI-7 GEKQ--VV--AGV--NYRLTLEA-----S-----SS--GAKDGRYEAVVYEQ-----

OsCPI-6 GEQQ--VV--SGM--NYRLEIEA-----A--S--GG---GDVTGSYGAVVFEQ-----  
OsCPI-8 GEQQ--VV--SGM--NYRLVUSA-----S--D--PA---GATA-SYVAVVVEQ-----  
SbCPI-3 GEQQ--VV--SGM--NYRLVLSA-----T--D--AD---GDVA-AYGALVVEQ-----  
FvCPI-7 AEIA--QI--LGT--LYHLTIAA-----K--NETSP---TSPA-NYEAGVLVR-----  
FvCPI-9 GLAA--NN--SGV--MYLLQIAA-----K--NESLP---IPAQ-NYTTGVWAR-----  
OsCPI-10 AQKQ--VV--SGV--AYYLVVAA-----SARDPRGGAAAGGDR-VFDAVVVVK-----  
OsCPI-5 AQTQ--VV--SGI--KYYLRVIAA-----Q--E-----ADDELVFDAVVVVK-----  
OsCPI-4 AQRQ--VV--SGL--KYYLRVAAAEEGAAGQ--N--G---GEPR-VFDAVVVVK-----  
SbCPI-11 AQRQ--VV--SGL--KYYLRVAAAEEGAAGQ--N--G---GEPR-VFDAVVVVK-----  
MtCPI-2 AEQQ--VV--SGM--KYYLNVISA-----V--D--HN---GVQR-MFNSVVVVK-----  
FvCPI-3 AETQ--VV--SGI--KYYLKIIST-----VRNGLNG---GTPL-LFDSQVVVK-----  
OsCPI-3 AKRQ--VV--TGT--LHDLMLEV-----V--D--S---GKKS-LYSAKVVVK-----  
SbCPI-13 SKRQ--VV--TGT--LHDLILEA-----A--D--A---GKKS-LYRAKVVVK-----  
SmCPI-2 AQTQ--VV--SGT--MFHLSIEA-----H--S--EQ---HGTG-VYDAKVVTK-----  
SmCPI-3 AQTQ--VV--SGT--MFHLSIEA-----H--S--EQ---HGTG-VYDAKVVTK-----  
PpCPI-5 AKEQ--VV--QGK--MYFTIEV-----M-----EN---GVPK-NYDAKVVVK-----  
SmCPI-1 AKSQ--VV--SGV--MYLLTVEA-----T--D--SK---NSVC-SYEAKVVVK-----  
SbCPI-15 VRTQ--LV--AGR--MYFTIEV-----R--EVDG---GASK-LYEAKVWLR-----  
SbCPI-20 VRYQ--VV--AGT--MHQFTVKV-----K--E--A---GSTKKLYKAKVWAM-----  
SbCPI-14 VRHQ--VV--AGT--MHHTVQV-----K--EA--G---GGKK-LYEAKVWEK-----  
AtCPI-1 AKTQ--VV--AGT--MHHTVVEV-----A--D--G---ETNK-VYEAKVLEK-----  
OsCPI-2 VRQQ--VV--GGF--MHYLTVEV-----K--EP--G---GANK-LYEAKVWER-----  
PpCPI-4 CHMQ--VV--AGS--MYLVIEV-----E--E--G---SSIK-LYEAKVWVK-----  
PpCPI-1 CRKQ--VV--QGT--MYHLVIEV-----E--E--S---GKLS-QYEAKVWVK-----  
PpCPI-2 CHKQ--VV--SGL--MYHFVIEV-----E--E--G---SQLK-QYEAKVWVK-----  
PpCPI-3 CHKQ--VV--SGL--MYHFVIEV-----E--Q--G---SQPK-QYEAKVWVK-----  
MtCPI-1 AKEQ--VV--AGT--IHHTIEV-----K--D--G---VNKK-VYEAKGLGK-----  
OsCPI-1 VKQQ--VV--AGT--LYFTIEV-----K--E-----GDAKKLYEAKVWEK-----  
SbCPI-10 AKTQ--VV--AGT--MYLTVEV-----K--D--G---EVKK-LYEAKVWEK-----  
AtCPI-7 ATEQ--VV--AGK--LYRLTLEV-----I--E--A---GEKK-IYEAKVWVK-----  
MtCPI-12 AKKK--VV--SGT--LYDITLET-----K--D--G---GKQK-VYEAKILEK-----  
FvCPI-1 TKEQ--VV--SGT--VYLTIEA-----T--D--G---GQKK-LFEAKVWVK-----  
VvCPI-5 VRQQ--VV--AGT--IYYITLDA-----T--D--G---GKKK-KYEAKIWVK-----  
AtCPI-3 AREQ--VV--AGT--MYHLTLEA-----K--E--G---DQTK-NFEAKVWVK-----  
VvCPI-2 AKEQ--VV--AGK--IYYLTLEA-----I--D--A---GKKK-IYEAKVWVK-----  
VvCPI-4 AEEQ--VV--AGT--LHHLTLEV-----I--D--A---GRKK-LYEAKVWVK-----  
AtCPI-6 AKEQ--VV--AGT--LHHLTLEI-----L--E--A---GQKK-LYEAKVWVK-----  
OsCPI-12 AKEQ--VV--AGT--LHHLTLEA-----L--E--A---GRKK-LYEAKVWVK-----  
SbCPI-9 AKEQ--VV--AGT--LHHLTLEA-----I--E--A---GKKK-LYEAKVWVK-----  
MtCPI-19 AREQ--VV--AGT--LHHLTLEA-----I--D--A---GEKK-IYEAKVWVK-----  
FvCPI-2 AKEQ--VV--AGT--LHHLVVEA-----I--D--G---GKKK-LYEAKVWVK-----  
FvCPI-12 GQEQ--SV--AGW--NYKLITSI-----K--D--G---SSIV-NYEVVYER-----  
FvCPI-8 GEKQ--VV--AGE--NYKLVITV-----K--D-----ESSSVNYECVVWEK-----  
AtCPI-4 GTTQ--VV--SGT--KYDLKIAA-----K--D--GG---GKIK-NYEAVVWEK-----  
MtCPI-20 GESQI-VA--DGV--NYRLTLSA-----T--K--V---YTSN-TYEAIIVLE-----  
MtCPI-14 GESKN-VV--DGT--VYRLTFSa-----H--G--L---STSY-KYRAIVFEK-----  
MtCPI-16 GESQN-VI--NGT--NYRLTLSA-----R--Q--I---ITVQ-KYRAIVLEK-----  
MtCPI-11 GYIQK-VG--LET--DYHLTISA-----K--N--G---STIN-NYEAVVFYS-----  
MtCPI-7 GISNL-GN--NVTIINYRLTLSA-----N--N--G---SASN-NYPAIVLDKSSEIF-----  
MtCPI-4 GVSNV-VD--NGT--RYSLTLSA-----N--N--G---SASN-NYDTIVLEK-----  
MtCPI-9 GVSNV-VD--NET--RYSLTLSA-----K--N--G---SASN-NYDTIVLEK-----  
MtCPI-18 GVIDT-LN--DGI--NFRLTLSA-----N--N--G---STSN-KYGAIIVLEK-----  
MtCPI-10 DVVDI-VN--DKT--KYRLTLSA-----N--N--G---STSN-NYEIIVLDK-----  
MtCPI-17 GVIDI-MN--NET--KYRLTLSA-----N--N--G---STSN-NYGAIIVLEK-----  
FvCPI-6 GETQ--VV--AGQ--NFRLLLAV-----K--D-----DTTAAKYVGVVYER-----  
MtCPI-15 GESRLALA--EDA--YRLIIST-----S--N-----SVPN-IFQAVVIEN-----  
MtCPI-21 GETK--VV--DGI--IYCLNITA-----S--D--G---SASN-KYNLAVLEK-----  
MtCPI-13 AESM--VV--EWI--NYRLILSA-----N--D--G---SHSK-TYKAVVWET-----  
MtCPI-8 GETQ--VV--SGT--NYRLVLSA-----K-----VV---SATK-NYEALVWEK-----  
AtCPI-5 GETQ--VV--SGT--NYRLKVAA-----N--D--GD---GVSK-NYLAIIVWDK-----  
VvCPI-1 GETQ--VV--SGT--NYRLVVVA-----E--D--G---GVSN-KYEAVVWEK-----  
MtCPI-3 GESQ--AV--DGT--NYRFILYV-----I--I--G---SESY-PYKAFVHEN-----  
MtCPI-6 GETQ--VV--DGT--NYRLLLSA-----I--I--E---SMSY-PYQAIIVYEN-----  
MtCPI-22 GESQ--VV--AGT--NYRLTLSA-----S--D-----GSYSKNYEAVVWEK-----  
MtCPI-5 GESQ--VT--SGI--YYDLILSA-----G--D-----GSHSNIYKALVWEK-----

VcCPI-1 --P-----W-NTGQNGDDHHNHITKFK-----  
CrCPI-1 --P-----W-LASKNDAAQPATQITALT-----  
SbCPI-17 --P-----GS-----ESKTWKLL-----T---  
OsCPI-18 --P-----GSGTW-----TWKVL-----S---  
SbCPI-6 --P-----G-----TYQWMLL-----E---  
OsCPI-17 --P-----E-----THAWMLL-----E---  
OsCPI-14 --P-----GT-----TTHWWFR-----S---  
SbCPI-8 --L-----G-----TTSWKL-----S---  
OsCPI-13 --L-----G-----TTNWKLL-----S---  
SbCPI-18 --P-----GS-----RSTTWLL-----S---  
OsCPI-15 --P-----GS-----RANTWKLL-----S---  
OsCPI-16 --P-----GS-----RLDTWKL-----R---  
SbCPI-7 --P-----GS-----RSDTWKL-----R---  
VvCPI-3 -----H-----NQCNELI-----N---  
FvCPI-11 --Y-----W-----DKIQSRSAMVDSGGRD-----  
FvCPI-5 -----W-----IAKRPLLLLLFGLVADNGN-----

AtCPI-2 --P-----W-----LHSKQLL-----G---  
 FvCPI-4 PPPDFCCGLGTGGNLRNFILVAAGCSSW-----PLMQRII-----GDIW  
 FvCPI-10 -----G-----SISEKLI-----S---  
 SbCPI-12 --D-----W-----MDGISLL-----S---  
 SbCPI-16 LSL-----W-----S-----S---  
 SbCPI-19 -----W-----IGRIILI-----S---  
 OsCPI-11 --V-----G-----ATTYQLS-----S---  
 SbCPI-5 --E-----W-----ENFLQLT-----S---  
 SbCPI-1 --V-----S-----DNTRQLL-----S---  
 SbCPI-2 --V-----S-----DKTRQLL-----S---  
 OsCPI-9 -----S-----GDEHKLV-----S---  
 SbCPI-4 --V-----W-----TNTRKLA-----S---  
 OsCPI-7 --DP-----R-----SNARKLV-----S---  
 OsCPI-6 --E-----W-----SNTRKLI-----S---  
 OsCPI-8 --S-----W-----TNTRQLT-----S---  
 SbCPI-3 --S-----W-----TNTRQLT-----S---  
 FvCPI-7 -----H-----GQDPKLT-----A---  
 FvCPI-9 -----Y-----REPLMLL-----A---  
 OsCPI-10 --A-----W-----LKSKELV-----S---  
 OsCPI-5 --A-----W-----VPSREMV-----S---  
 OsCPI-4 --P-----W-----LESRTLL-----T---  
 SbCPI-11 --P-----W-----LESRTLL-----T---  
 MtCPI-2 --P-----W-----LHQYKKVI-----Q---  
 FvCPI-3 --P-----W-----LRSKRL-----N---  
 OsCPI-3 --P-----W-----LDFKAVV-----E---  
 SbCPI-13 --P-----W-----EDFKSVV-----E---  
 SmCPI-2 --P-----W-----ESFKKLE-----E---  
 SmCPI-3 --P-----W-----ESFKKLE-----D---  
 PpCPI-5 --P-----W-----EGYKELE-----S---  
 SmCPI-1 --E-----W-----ENFRRLM-----S---  
 SbCPI-15 --P-----W-----ENFKGLH-----A---  
 SbCPI-20 -----W-----KNFKQLQ-----S---  
 SbCPI-14 --V-----W-----ENFKQLQ-----S---  
 AtCPI-1 --A-----W-----ENLQKLE-----S---  
 OsCPI-2 --A-----W-----ENFKQLQ-----D---  
 PpCPI-4 --P-----W-----QNFKKLE-----E---  
 PpCPI-1 --P-----W-----ENFKKLE-----D---  
 PpCPI-2 --P-----G-----GSSRKLE-----E---  
 PpCPI-3 --P-----G-----GASKKLE-----E---  
 MtCPI-1 --V-----S-----LDELQ-----G---  
 OsCPI-1 --P-----W-----MDFKELQ-----E---  
 SbCPI-10 --P-----W-----ENFKELQ-----E---  
 AtCPI-7 --P-----W-----MNFKQLQ-----E---  
 MtCPI-12 --P-----W-----LNFKEVQ-----E---  
 FvCPI-1 --P-----W-----LNFKEVQ-----E---  
 VvCPI-5 --P-----W-----LNFKELQ-----E---  
 AtCPI-3 --P-----W-----MNFKQLQ-----E---  
 VvCPI-2 --P-----W-----MNFKELQ-----E---  
 VvCPI-4 --P-----W-----MNFKELQ-----E---  
 AtCPI-6 --P-----W-----LNFKELQ-----E---  
 OsCPI-12 --P-----W-----LDFKELQ-----E---  
 SbCPI-9 --P-----W-----LNFKELQ-----D---  
 MtCPI-19 --P-----W-----MNFKELT-----E---  
 FvCPI-2 --P-----W-----LNFKQVQ-----E---  
 FvCPI-12 -----YVLAALLESSQEDLSVDGALV-----EKAK  
 FvCPI-8 --E-----QHGRSYTNNEEKVTLFAILE-----E---  
 AtCPI-4 --L-----W-----LHKSLE-----S---  
 MtCPI-20 -----W-----SLQHLRNL-----S---  
 MtCPI-14 --P-----S-----EHYRKLA-----S---  
 MtCPI-16 --P-----L-----VHFRNLV-----S---  
 MtCPI-11 --P-----S-----IFELSLK-----S---  
 MtCPI-7 SVP-----VYQKTCLDTFGEHETYCKELS-----N---  
 MtCPI-4 --S-----S-----ENFSLIA-----S---  
 MtCPI-9 --S-----S-----ENFSLIA-----S---  
 MtCPI-18 --A-----Y-----KHFRKLT-----A---  
 MtCPI-10 --P-----L-----EHLRNL-----A---  
 MtCPI-17 --P-----L-----EHLRNL-----A---  
 FvCPI-6 --V-----W-----EHTRKLL-----S---  
 MtCPI-15 --K-----L-----NHDRNL-----S---  
 MtCPI-21 --L-----E-----QHFRNL-----S---  
 MtCPI-13 --T-----D-----RDAKNLT-----S---  
 MtCPI-8 --P-----W-----LHLKNLT-----S---  
 AtCPI-5 --P-----W-----MKFRNL-----S---  
 VvCPI-1 --P-----W-----MGFRNL-----S---  
 MtCPI-3 --A-----S-----KSFKKLI-----S---  
 MtCPI-6 --R-----L-----KNFKKLI-----S---  
 MtCPI-22 --I-----W-----QHFRNL-----S---  
 MtCPI-5 --T-----W-----QHNL-----S---

VcCPI-1 Y--QYIDP-----TLE-----  
 CrCPI-1 F--KPLDG-----TLE-----  
 SbCPI-17 F--EGTM-----



|          |                                                             |
|----------|-------------------------------------------------------------|
| OsCPI-18 | F--RRVAGDQN-----                                            |
| SbCPI-6  | F--KKIN-----                                                |
| OsCPI-17 | F--NRIN-----                                                |
| OsCPI-14 | F--TPKRS-----                                               |
| SbCPI-8  | F--TPKY-----                                                |
| OsCPI-13 | F--TLAAN-----                                               |
| SbCPI-18 | F--VPYTQ-----AP-----                                        |
| OsCPI-15 | F--KAT-----                                                 |
| OsCPI-16 | F--RRIQ-----P-----                                          |
| SbCPI-7  | F--RKIVQ-----G-----                                         |
| VvCPI-3  | Y--HKILL-----TKL-----                                       |
| FvCPI-11 | F--RLYSG-----GTGRCL                                         |
| FvCPI-5  | W--DLIKL-----I                                              |
| AtCPI-2  | F--TPVVS-----PVY-----                                       |
| FvCPI-4  | W--SRLVA-----AAAPRADRPSCGR-----RLI-----                     |
| FvCPI-10 | F--TQITN-----                                               |
| SbCPI-12 | F--KPAK-----                                                |
| SbCPI-16 | F--KPAN-----                                                |
| SbCPI-19 | F--NPAR-----                                                |
| OsCPI-11 | F--KLATK-----                                               |
| SbCPI-5  | F--KPAN-----                                                |
| SbCPI-1  | F--APEN-----                                                |
| SbCPI-2  | F--SPAN-----                                                |
| OsCPI-9  | F--VPIH-----                                                |
| SbCPI-4  | F--TLASR-----AH-----                                        |
| OsCPI-7  | F--EPIH-----                                                |
| OsCPI-6  | F--DKNHN-----F-----                                         |
| OsCPI-8  | F--KPAAA-----H-----                                         |
| SbCPI-3  | F--ASAN-----                                                |
| FvCPI-7  | F--HIAKC-----                                               |
| FvCPI-9  | F--HKTNE-----TTVE-----                                      |
| OsCPI-10 | F--TPASS-----TK-----                                        |
| OsCPI-5  | F--VPAAE-----LPGY-----                                      |
| OsCPI-4  | F--APAAD-----SPNES-----                                     |
| SbCPI-11 | F--APAAA-----K-----                                         |
| MtCPI-2  | T--RHIMG-----ILVP-----                                      |
| FvCPI-3  | F--APHS-----TENPKGVCNKPRKMSRRNDDVAGSPVINDITDAFLWSATIGATKAA  |
| OsCPI-3  | F--RHVGD-----SQ                                             |
| SbCPI-13 | F--RLVGD-----SESESESSVTS-----                               |
| SmCPI-2  | F--KPSKQ-----ETA                                            |
| SmCPI-3  | F--KPSKQ-----GSDFCFSCCSPEA-----A                            |
| PpCPI-5  | F--LPSAP-----                                               |
| SmCPI-1  | F--D-----                                                   |
| SbCPI-15 | F--DPVAD-----AA-----                                        |
| SbCPI-20 | --MPQSP-----DLRYKLFHRCSTK-----NRRE-----                     |
| SbCPI-14 | F--QVGD-----AAVA-----                                       |
| AtCPI-1  | F--NHLHD-----V-----                                         |
| OsCPI-2  | F--KPLDD-----ATA-----                                       |
| PpCPI-4  | F--KLKDAGVTSADLGVRTGGPHSTG-----RGISAPPS                     |
| PpCPI-1  | F--KPKEQ-----EVFTSADLGV-----PGGPFMVLGGNSAPPT                |
| PpCPI-2  | F--KSDVGGLTSA DTGVKTEE ICHNAG-----VPLTKVQSHSCVPV            |
| PpCPI-3  | F--KPKDA-----                                               |
| MtCPI-1  | G--SRVQA-----RRRCACA-----                                   |
| OsCPI-1  | F--KPVDA-----SANA-----                                      |
| SbCPI-10 | F--KPVVE-----GASA-----                                      |
| AtCPI-7  | F--KNLIP-----SFTISDLGFKP-----DGNGF                          |
| MtCPI-12 | F--KLISQ-----NDDAPSVSST-----                                |
| FvCPI-1  | F--KPVAD-----V-----                                         |
| VvCPI-5  | F--KPIGD-----EPATASA-----                                   |
| AtCPI-3  | F--KESSS-----                                               |
| VvCPI-2  | F--KHSQE-----TKSFAPSDLGVKQ-----DGHGS                        |
| VvCPI-4  | F--KHAGD-----VPTLTPSDLGVK-----DGHGP                         |
| AtCPI-6  | F--KPASD-----APAITSSDLGCKQ-----GEHES                        |
| OsCPI-12 | F--RNTGD-----ATFTNADLGAKK-----GGHEP                         |
| SbCPI-9  | F--SHKGE-----ATFTNADLGAKK-----GEHEP                         |
| MtCPI-19 | F--KHAGD-----GHAPSFTTSSDLGVK-----DGHKP                      |
| FvCPI-2  | F--KHAGEPETVSGTPTSFTSSDLGVK-----GGHAP                       |
| FvCPI-12 | FLMRCFESCRWSYVPREADKVAHKV-----                              |
| FvCPI-8  | F--DDIEN-----FNSQEKHSFTLGL-----KAFNYEIEDSPERWDWNTVGHKRSCEPV |
| AtCPI-4  | F--KAL-----                                                 |
| MtCPI-20 | F--KLIQP-----IP                                             |
| MtCPI-14 | F--ELVHA-----                                               |
| MtCPI-16 | F--ELINA-----                                               |
| MtCPI-11 | F--VLIHA-----                                               |
| MtCPI-7  | F--KYMHNFSVDTFFDVFKQVQASMKK-----ERHVN                       |
| MtCPI-4  | FALNPHA-----                                                |
| MtCPI-9  | FALNPHA-----                                                |
| MtCPI-18 | F--APVOH-----A-----                                         |
| MtCPI-10 | F--ALISR-----A-----                                         |
| MtCPI-17 | F--LHLFLMFKLSNVVFI III-----                                 |
| FvCPI-6  | F--DQVKK-----                                               |
| MtCPI-15 | F--ILTH-----                                                |
| MtCPI-21 | F--VPLQN-----                                               |

MtCPI-13 F--APVVN-----Y-----  
MtCPI-8 F--KPVA-----  
AtCPI-5 F--EPANN-----GRFL-----  
VvCPI-1 F--TRV-----  
MtCPI-3 F--VSID-----  
MtCPI-6 F--VPIN-----  
MtCPI-22 F--VPVHA-----  
MtCPI-5 F--VPANN-----

VcCPI-1 -----  
CrCPI-1 -----  
SbCPI-17 -----  
OsCPI-18 -----  
SbCPI-6 -----  
OsCPI-17 -----  
OsCPI-14 -----  
SbCPI-8 -----  
OsCPI-13 -----  
SbCPI-18 -----  
OsCPI-15 -----  
OsCPI-16 -----  
SbCPI-7 -----  
VvCPI-3 -----  
FvCPI-11 LWRMWNVLDHGVRMAHQILVSEK-----  
FvCPI-5 DNRGVFPGPPTDNRRCFGRRRIKIQKTQRCSLEEEILSTLHLPLK-----  
AtCPI-2 -----  
FvCPI-4 -----  
FvCPI-10 -----  
SbCPI-12 -----  
SbCPI-16 -----  
SbCPI-19 -----  
OsCPI-11 -----  
SbCPI-5 -----  
SbCPI-1 -----  
SbCPI-2 -----  
OsCPI-9 -----  
SbCPI-4 -----  
OsCPI-7 -----  
OsCPI-6 -----  
OsCPI-8 -----  
SbCPI-3 -----  
FvCPI-7 -----  
FvCPI-9 -----  
OsCPI-10 -----  
OsCPI-5 -----  
OsCPI-4 -----  
SbCPI-11 -----  
MtCPI-2 -----  
FvCPI-3 AEGTYAIQRGSVSSHDFECTLKRMGEEGVYWGTTAGLFVTTEYGLSVRGRSDWKNTLI  
OsCPI-3 SQSATAADDNAGQDTADPTVASRNDLHNTENNKVSVVLSTFSQTYSV-----  
SbCPI-13 ---DVSSGQAIAKLSLEADIAQEEAHLHTIENDGLSGDFASS-----  
SmCPI-2 GAAIALDDPVVINEAAEHALKGLQQRNSNLIPEYLDHVVKQAEEVEIDTHRPSDKGTNA  
SmCPI-3 GAAIALDDPVVINEAAEHALKGLQQRNSNLIPEYLDHVVKQAEE-----GTNA  
PpCPI-5 -----SHYDSAVDSDAKSGDCYEKSEIAT-----  
SmCPI-1 -----  
SbCPI-15 -----  
SbCPI-20 -----  
SbCPI-14 -----  
AtCPI-1 -----  
OsCPI-2 -----  
PpCPI-4 GKQSWPTDDL VVQEA AEHAMKMLQQGSNSLASYELSEIVSADAELSD-----ESAD  
PpCPI-1 DKQSVPTDDPVVQEA AEHVIKTLQMGNSNSLSTYELNEILSAEALND-----ETAQ  
PpCPI-2 GKQIVPTEAPIVQEA AEHAIKMLQQGSNSLSSYELREIVSAAQLKE-----GSAV  
PpCPI-3 -----  
MtCPI-1 -----  
OsCPI-1 -----  
SbCPI-10 -----  
AtCPI-7 DWRSVSTNNPEVQEA AKHAMKSLQQKNSNLFYKLDIILARAKVVE-----ERVK  
MtCPI-12 -----  
FvCPI-1 -----  
VvCPI-5 -----  
AtCPI-3 -----  
VvCPI-2 EWQVVPTNDPEVQDA ANHVVKSIQMRNSNIFRYELLEILLAKAKVIE-----GSAK  
VvCPI-4 GWQEVPAHDPEVQNA ANHAIKTLQQRNSNIFPHELQEILLAKAEVSQ-----NLVK  
AtCPI-6 GWREVP GDDPEVKHVAEQAVKTIQQRNSNLFYELLEVVHAKAEVTG-----EAAK  
OsCPI-12 GWRDVPVHDPVVKDAADHAVKSIQQRNSNLFYELLEIVRAKAEVVE-----DFAK  
SbCPI-9 GWREVP IEDPVVKDAAHHAVKSIQERSNSLFPYELLEIVRAKAQVVE-----DFAK  
MtCPI-19 GWQSVPAHDPQVQDA ANHAIKTIQQRNSNLFYELHEVTDAKAEVID-----DTAK  
FvCPI-2 GWQDVHPHDPQVQDA ANHAVKSLQQKNSNLFYELQEVVHAKAEVME-----EHAK  
FvCPI-12 -----  
FvCPI-8 TNIKNQGNCVRNTTEASRVEAPSPAVSKLAK-----  
AtCPI-4 -----

MtCPI-20 AHEGLRHSKGDANSKFFHGCISQGRRSNNISSFMVNGAACGRCVSAPSSLYSEPFNGKQL  
MtCPI-14 -----  
MtCPI-16 -----  
MtCPI-11 -----  
MtCPI-7 FLSDLDPDGRSTLRPTNVMVYEWVGGKHAFVDLTGVSPLV-----  
MtCPI-4 -----  
MtCPI-9 -----  
MtCPI-18 -----  
MtCPI-10 -----  
MtCPI-17 -----  
FvCPI-6 -----  
MtCPI-15 -----  
MtCPI-21 -----  
MtCPI-13 -----  
MtCPI-8 -----  
AtCPI-5 -----  
VvCPI-1 -----  
MtCPI-3 -----  
MtCPI-6 -----  
MtCPI-22 -----  
MtCPI-5 -----

VcCPI-1 -----  
CrCPI-1 -----  
SbCPI-17 -----  
OsCPI-18 -----  
SbCPI-6 -----  
OsCPI-17 -----  
OsCPI-14 -----  
SbCPI-8 -----  
OsCPI-13 -----  
SbCPI-18 -----  
OsCPI-15 -----  
OsCPI-16 -----  
SbCPI-7 -----  
VvCPI-3 -----  
FvCPI-11 -----  
FvCPI-5 -----  
AtCPI-2 -----  
FvCPI-4 -----  
FvCPI-10 -----  
SbCPI-12 -----  
SbCPI-16 -----  
SbCPI-19 -----  
OsCPI-11 -----  
SbCPI-5 -----  
SbCPI-1 -----  
SbCPI-2 -----  
OsCPI-9 -----  
SbCPI-4 -----  
OsCPI-7 -----  
OsCPI-6 -----  
OsCPI-8 -----  
SbCPI-3 -----  
FvCPI-7 -----  
FvCPI-9 -----  
OsCPI-10 -----  
OsCPI-5 -----  
OsCPI-4 -----  
SbCPI-11 -----  
MtCPI-2 -----  
FvCPI-3 AGAVTGAVMSAVNKNKDKILTD AIVGGAVATAASFVRNFRTGK  
OsCPI-3 -----  
SbCPI-13 -----  
SmCPI-2 LDLVLKVKRGSREEHVNAKLHRGDTGWTLTSAHVL-----  
SmCPI-3 LDLVLKVKRGSREEHVNAKLHRGDTGWTLTSAHVL-----  
PpCPI-5 -----  
SmCPI-1 -----  
SbCPI-15 -----  
SbCPI-20 -----  
SbCPI-14 -----  
AtCPI-1 -----  
OsCPI-2 -----  
PpCPI-4 FELLKIKRGAKEEHFKSEIHR TGDGDWSVKHVTLQ-----  
PpCPI-1 FDLLLKTKLGAKEQVFKAEVSRTGDGDWTVKHATIQ-----  
PpCPI-2 FDLLLKTKRGSKEENFKSEVHRAEDGSWSVKHATLE-----  
PpCPI-3 -----  
MtCPI-1 -----VKRLTRYFITLHNSSCLLF-----  
OsCPI-1 -----  
SbCPI-10 -----  
AtCPI-7 FELLKLERGNKLEKFMVEVMKDQTKGYE-----  
MtCPI-12 -----

FvCPI-1 -----  
VvCPI-5 -----  
AtCPI-3 -----  
VvCPI-2 FDLLLKWKVSKDVKFKAEVNKNIEGKFCSTQWKEDHL-----  
VvCPI-4 FDMLLKVKRGDKEEKYKVEVHKNNEGAYQLNQMAP-DHS-----  
AtCPI-6 YNMLLKLKRGEKEEKFKVEVHKNHEGALHLNHAEQ-HHD-----  
OsCPI-12 FDILMKLKRGNKEEKFKAEVHKNLEGAFVLNQMQQ-EHDESSQ  
SbCPI-9 FDILMKLKRGSKEEKIKAEVHKSLEGAFVLNKHQPAEHEESSQ  
MtCPI-19 FNLLLKVKRGQKEEKFKVEVHKNSEGNFHLNQMEA-DNS-----  
FvCPI-2 FNMLLKLKRGDKEEKYKVEVHKNNEGAYNLNQMEV-EH-----  
FvCPI-12 -----  
FvCPI-8 -----  
AtCPI-4 -----  
MtCPI-20 RPCLANFEDQLLLADFDL-----  
MtCPI-14 -----  
MtCPI-16 -----  
MtCPI-11 -----  
MtCPI-7 -----  
MtCPI-4 -----  
MtCPI-9 -----  
MtCPI-18 -----  
MtCPI-10 -----  
MtCPI-17 -----  
FvCPI-6 -----  
MtCPI-15 -----  
MtCPI-21 -----  
MtCPI-13 -----  
MtCPI-8 -----  
AtCPI-5 -----  
VvCPI-1 -----  
MtCPI-3 -----  
MtCPI-6 -----  
MtCPI-22 -----  
MtCPI-5 -----

# I. I51 Serine Carboxypeptidase Y Inhibitors (SCPYInh).

SmSCPYI-11 -----  
PpSCPYI-3 -----  
MpSCPYI-1 -----MRRGGPEELPLL  
SmSCPYI-15 -----  
SmSCPYI-14 -----  
SmSCPYI-16 -----  
SmSCPYI-17 -----  
SmSCPYI-18 -----  
SmSCPYI-1 -----  
SmSCPYI-6 -----  
SmSCPYI-2 -----  
SmSCPYI-10 -----  
SmSCPYI-8 -----  
SmSCPYI-9 -----  
SmSCPYI-5 -----  
SmSCPYI-7 -----  
PpSCPYI-2 -----MYVSV  
MpSCPYI-2 -----  
CsSCPYI-1 -----  
SmSCPYI-12 -----  
SmSCPYI-13 -----  
SmSCPYI-4 -----  
AtSCPYI-5 -----  
VvSCPYI-1 -----  
FvSCPYI-1 -----  
MtSCPYI-8 -----  
AtSCPYI-6 -----  
MtSCPYI-1 -----  
AtSCPYI-1 -----  
FvSCPYI-3 -----  
VvSCPYI-6 -----  
MtSCPYI-5 -----  
VvSCPYI-5 -----  
OsSCPYI-13 -----  
OsSCPYI-15 -----  
SbSCPYI-9 -----  
SbSCPYI-13 -----  
SbSCPYI-11 -----  
OsSCPYI-5 -----  
SbSCPYI-7 -----  
OsSCPYI-4 -----  
OsSCPYI-12 -----  
SbSCPYI-5 -----  
OsSCPYI-10 -----  
SbSCPYI-17 -----  
OsSCPYI-3 -----  
SbSCPYI-6 -----  
SbSCPYI-10 -----  
OsSCPYI-11 -----  
SbSCPYI-2 -----  
MtSCPYI-2 -----  
OsSCPYI-17 -----  
SbSCPYI-8 -----  
OsSCPYI-6 -----  
SbSCPYI-12 -----  
OsSCPYI-16 -----  
SbSCPYI-1 -----  
OsSCPYI-14 -----  
SbSCPYI-14 -----  
MtSCPYI-4 -----  
MtSCPYI-3 -----  
MtSCPYI-6 -----  
FvSCPYI-5 -----  
AtSCPYI-2 -----  
AtSCPYI-4 -----  
SbSCPYI-3 MKFHRLTTARSGSAACIGLSTPTPTPTGMDAGRFPPTPLAAHGCARISSTTTDDDNSITQA  
FvSCPYI-2 -----  
VvSCPYI-2 -----  
OsSCPYI-2 -----MTGSSCPADSSQLLYPRRGAPTTTTTSRPPLHPLIAH  
SbSCPYI-15 -----  
OsSCPYI-7 -----  
OsSCPYI-8 -----  
VvSCPYI-3 -----  
PpSCPYI-1 -----  
PpSCPYI-4 -----  
PpSCPYI-5 -----  
PpSCPYI-6 -----  
SmSCPYI-3 -----  
MtSCPYI-7 -----  
AtSCPYI-3 -----  
FvSCPYI-4 -----MRCRPLISQPGAPPELLSSRVFSYEDGGRVLVQMDLHTLTKTLRDGSCV

VvSCPyl-4 -----  
OsSCPyl-1 -----  
SbSCPyl-4 -----  
OsSCPyl-9 -----  
SbSCPyl-16 -----  
  
SmSCPyl-11 -----  
PpSCPyl-3 -----  
MpSCPyl-1 NKPANGKYGAKTLDDTTSTASNAVNAGDAILTALHGQRNKVLSARVNNESMQSDMDVSER  
SmSCPyl-15 -----  
SmSCPyl-14 -----MWSQDLSIWS  
SmSCPyl-16 -----  
SmSCPyl-17 -----  
SmSCPyl-18 -----  
SmSCPyl-1 -----  
SmSCPyl-6 -----  
SmSCPyl-2 -----  
SmSCPyl-10 -----  
SmSCPyl-8 -----  
SmSCPyl-9 -----  
SmSCPyl-5 -----  
SmSCPyl-7 -----  
PpSCPyl-2 LLLLLLTMAAGIARYGSDALLSVEADNVLMREPSNDPVYREDSRELLHGNAFLNEEESPY  
MpSCPyl-2 -----MADPGGVINPNSVQLCKL  
CsSCPyl-1 -----MRFISAGLLVLLVALSASTAS  
SmSCPyl-12 -----  
SmSCPyl-13 -----  
SmSCPyl-4 -----  
AtSCPyl-5 -----  
VvSCPyl-1 -----  
FvSCPyl-1 -----  
MtSCPyl-8 -----  
AtSCPyl-6 -----  
MtSCPyl-1 -----  
AtSCPyl-1 -----  
FvSCPyl-3 -----  
VvSCPyl-6 -----  
MtSCPyl-5 -----  
VvSCPyl-5 -----  
OsSCPyl-13 -----  
OsSCPyl-15 -----  
SbSCPyl-9 -----  
SbSCPyl-13 -----  
SbSCPyl-11 -----  
OsSCPyl-5 -----  
SbSCPyl-7 -----  
OsSCPyl-4 -----  
OsSCPyl-12 -----  
SbSCPyl-5 -----  
OsSCPyl-10 -----  
SbSCPyl-17 -----  
OsSCPyl-3 -----  
SbSCPyl-6 -----  
SbSCPyl-10 -----  
OsSCPyl-11 -----  
SbSCPyl-2 -----  
MtSCPyl-2 -----  
OsSCPyl-17 -----  
SbSCPyl-8 -----  
OsSCPyl-6 -----  
SbSCPyl-12 -----  
OsSCPyl-16 -----  
SbSCPyl-1 -----  
OsSCPyl-14 -----  
SbSCPyl-14 -----  
MtSCPyl-4 -----  
MtSCPyl-3 -----  
MtSCPyl-6 -----  
FvSCPyl-5 -----  
AtSCPyl-2 -----  
AtSCPyl-4 -----  
SbSCPyl-3 CPITTSRGTSTPPPPAGPPGPHLPPRPLCLLARSRSSISRKHPHRQESLCSGLERRRTTT  
FvSCPyl-2 -----  
VvSCPyl-2 -----  
OsSCPyl-2 APYDVVLHRSVVLSISSARDQAEASFWCYIRLGGGASAKRAAGEDDRSRSSLTAARGGG  
SbSCPyl-15 -----  
OsSCPyl-7 -----  
OsSCPyl-8 -----  
VvSCPyl-3 -----  
PpSCPyl-1 -----  
PpSCPyl-4 -----  
PpSCPyl-5 -----

PpSCPYP1-6 -----  
SmSCPYP1-3 -----  
MtSCPYP1-7 -----  
AtSCPYP1-3 -----  
FvSCPYP1-4 FLQGSQSVTQVLPLECFMVLIAKKLWGENDSHIGSFVDRCLAVTDGCDRAIWMEETEGWW  
VvSCPYP1-4 -----  
OsSCPYP1-1 -----  
SbSCPYP1-4 -----  
OsSCPYP1-9 -----  
SbSCPYP1-16 -----  
  
SmSCPYP1-11 -----MADQ-----FRLV-----  
PpSCPYP1-3 -----MDE-----SAMY-----  
MpSCPYP1-1 RMSRMACERCQRYICLICLLLVIGGASFYLYWRYELRDDGAAPAPAPTAATLG-----  
SmSCPYP1-15 -----MRKLVVVAFL-----AIF-----  
SmSCPYP1-14 KLEKLNPERL-----LKQDINMKGIDL CRTPYR-----  
SmSCPYP1-16 -----MRKL-----VL-----AAFL-----  
SmSCPYP1-17 -----MRKLVAVAF-----AIF-----  
SmSCPYP1-18 -----MAASLV-----SCFL-----  
SmSCPYP1-1 -----MAIS-----VV-----FCFV-----  
SmSCPYP1-6 -----MKRY-----VE-----SCQV-----  
SmSCPYP1-2 -----MATS-----VV-----SSLV-----  
SmSCPYP1-10 -----M-----SCLI-----  
SmSCPYP1-8 -----MKRY-----VE-----SCQV-----  
SmSCPYP1-9 -----MDSK-----AL-----QLLI-----  
SmSCPYP1-5 -----MAAS-----VV-----SSLI-----  
SmSCPYP1-7 -----MATS-----VV-----FCFV-----  
PpSCPYP1-2 FAAGYPNGGNYELTKDSRATANATVGNVTIETALVAERIAEVEGEDQPGGPPVL-----  
MpSCPYP1-2 VGWAFIKNRQ-----ARADREWRHTYGGEPWRGTPYRR-----  
CsSCPYP1-1 LATLISQEQT-----EDLT-----  
SmSCPYP1-12 -----  
SmSCPYP1-13 -----  
SmSCPYP1-4 --MEQPESRHREDVNAL-----DPLI-----  
AtSCPYP1-5 -----MSREI-----EPLI-----  
VvSCPYP1-1 -----MSRNM-----EPLS-----  
FvSCPYP1-1 -----M-----ETLT-----  
MtSCPYP1-8 -----MSRP-----L-----EPLS-----  
AtSCPYP1-6 --MENMGTRVI-----EPLI-----  
MtSCPYP1-1 -----MSIVT-----DPLA-----  
AtSCPYP1-1 -----MARISS-----DPLM-----  
FvSCPYP1-3 -----MAKIS-----DPLV-----  
VvSCPYP1-6 -----MARM-----S-----DPLI-----  
MtSCPYP1-5 -----MARM-----SQ-----EPLI-----  
VvSCPYP1-5 -----MARI-----L-----EPLI-----  
OsSCPYP1-13 -----MSRS-----V-----EPLV-----  
OsSCPYP1-15 -----MSRS-----V-----EPLV-----  
SbSCPYP1-9 -----MSRS-----V-----ESLI-----  
SbSCPYP1-13 -----MSRS-----V-----EPLI-----  
SbSCPYP1-11 -----MSRV-----L-----EPLV-----  
OsSCPYP1-5 -----MSRV-----L-----EPLV-----  
SbSCPYP1-7 -----MSRV-----L-----EPLI-----  
OsSCPYP1-4 -----MSRVL-----EPLI-----  
OsSCPYP1-12 -----M-----DPLY-----  
SbSCPYP1-5 -----MTDV-----EPLV-----  
OsSCPYP1-10 -----MAN-----DSL-----  
SbSCPYP1-17 -----MAN-----DSL-----  
OsSCPYP1-3 -----MAN-----DSL-----  
SbSCPYP1-6 -----MAN-----DSL-----  
SbSCPYP1-10 -----MAAN-----DSL-----  
OsSCPYP1-11 -----MSRG-----R-----DPL-----  
SbSCPYP1-2 -----MSRG-----R-----DPL-----  
MtSCPYP1-2 -----MPQN-----LV-----DPL-----  
OsSCPYP1-17 -----MSR-----DPL-----  
SbSCPYP1-8 -----MSR-----DPL-----  
OsSCPYP1-6 -----MSR-----DPL-----  
SbSCPYP1-12 -----MSR-----DPL-----  
OsSCPYP1-16 -----MSR-----DPL-----  
SbSCPYP1-1 -----MSR-----DPL-----  
OsSCPYP1-14 -----MSMSR-----DPL-----  
SbSCPYP1-14 -----MSSR-----DPL-----  
MtSCPYP1-4 -----MAGSSR-----NPL-----  
MtSCPYP1-3 -----MRIK-----ST-----NPL-----  
MtSCPYP1-6 -----M-----NPL-----  
FvSCPYP1-5 -----MAKARD-----Q-----DAL-----  
AtSCPYP1-2 -----MSLSRR-----DPL-----  
AtSCPYP1-4 -----MSIN-----IR-----DPL-----  
SbSCPYP1-3 TTTRQRGSRE-----RRRSSDRAATMQRGDPL-----  
FvSCPYP1-2 -----MPRD-----R-----DPL-----  
VvSCPYP1-2 -----MPRE-----R-----DPL-----  
OsSCPYP1-2 GETMSGRGRG-----DPL-----  
SbSCPYP1-15 --MAGSGRE-----R-----ETL-----  
OsSCPYP1-7 --MAGSGRD-----DPL-----

OsSCPYP1-8 ---MAGSGRD-----R-----DPLV-----  
 VvSCPYP1-3 ---MAGS-----L-----ESLV-----  
 PpSCPYP1-1 ---MSRS-----V-----DPLV-----  
 PpSCPYP1-4 ---MARS-----I-----DPLV-----  
 PpSCPYP1-5 ---MPRS-----I-----DPLI-----  
 PpSCPYP1-6 ---MARS-----I-----DPLV-----  
 SmSCPYP1-3 ---MGRS-----M-----DPLV-----  
 MtSCPYP1-7 ---MAAS-----V-----DPLV-----  
 AtSCPYP1-3 ---MAAS-----V-----DPLV-----  
 FvSCPYP1-4 FYLIDGGPRVESFACL LSCFLFLFLFFFFFFFFFFFFSLFSFFPITMAVSVDPDV-----  
 VvSCPYP1-4 ---MAAS-----V-----DPLV-----  
 OsSCPYP1-1 ---MARF-----V-----DPLV-----  
 SbSCPYP1-4 ---MARF-----V-----DPLV-----  
 OsSCPYP1-9 ---MASH-----V-----DPLV-----  
 SbSCPYP1-16 ---MAAH-----V-----DPLV-----

SmSCPYP1-11 -----SPGG-----  
 PpSCPYP1-3 -----ITSRA-----  
 MpSCPYP1-1 -----AGAAAW-----LGGEVIPI  
 SmSCPYP1-15 -----AGA-----TSSRLLAS  
 SmSCPYP1-14 -----AGRLP-----NLGNV-----  
 SmSCPYP1-16 -----AIFFAGA-----TSSRLLAS  
 SmSCPYP1-17 -----AGA-----TSSRLLAS  
 SmSCPYP1-18 -----VCL-----  
 SmSCPYP1-1 -----LCF-----FLVQV-----  
 SmSCPYP1-6 -----VLPED-----  
 SmSCPYP1-2 -----FFS-----LLAQV-----  
 SmSCPYP1-10 -----LCS-----LLAQA-----  
 SmSCPYP1-8 -----VLPED-----  
 SmSCPYP1-9 -----LSLVSIGHFPNCGTSQCRAHLLKECVPCVASGTV-----  
 SmSCPYP1-5 -----LCS-----FLVQV-----  
 SmSCPYP1-7 -----LCF-----FLIQV-----  
 PpSCPYP1-2 -----GNGFLSGDIVTTVPTPDLVKGVVGHLEQTG-----I IPEV-----  
 MpSCPYP1-2 PEAEKRAPREATATTATTTTTTTTREDDED-----VMDDAEIY  
 CsSCPYP1-1 -----AAK-----VIPDVISG  
 SmSCPYP1-12 -----IIPAW-----  
 SmSCPYP1-13 -----VIPDW-----  
 SmSCPYP1-4 -----LGG-----IIPDV-----  
 AtSCPYP1-5 -----VGR-----VIGDV-----  
 VvSCPYP1-1 -----VGR-----VVGDV-----  
 FvSCPYP1-1 -----LGR-----VVEV-----  
 MtSCPYP1-8 -----VGR-----VIGEV-----  
 AtSCPYP1-6 -----MGR-----VVGDV-----  
 MtSCPYP1-1 -----IGR-----VIGDV-----  
 AtSCPYP1-1 -----VGR-----VIGDV-----  
 FvSCPYP1-3 -----VGR-----VIGDV-----  
 VvSCPYP1-6 -----VGR-----VIGDV-----  
 MtSCPYP1-5 -----VGR-----VIGEV-----  
 VvSCPYP1-5 -----VGR-----VIGDV-----  
 OsSCPYP1-13 -----VGR-----VIGEV-----  
 OsSCPYP1-15 -----VGR-----VIGEV-----  
 SbSCPYP1-9 -----VGR-----VIGEV-----  
 SbSCPYP1-13 -----VGR-----VIGEV-----  
 SbSCPYP1-11 -----VGK-----VIGEV-----  
 OsSCPYP1-5 -----VGK-----VIGEV-----  
 SbSCPYP1-7 -----VGK-----VIGEV-----  
 OsSCPYP1-4 -----VGK-----VIGEV-----  
 OsSCPYP1-12 -----LSQ-----IIPDV-----  
 SbSCPYP1-5 -----LAH-----VIRDV-----  
 OsSCPYP1-10 -----RSH-----IVGDV-----  
 SbSCPYP1-17 -----RGH-----IIGDV-----  
 OsSCPYP1-3 -----TGR-----VIGDV-----  
 SbSCPYP1-6 -----TAR-----VIGDV-----  
 SbSCPYP1-10 -----TAH-----VIGDV-----  
 OsSCPYP1-11 -----LSQ-----VIGDV-----  
 SbSCPYP1-2 -----LSQ-----VIGDV-----  
 MtSCPYP1-2 -----G-----VIGDV-----  
 OsSCPYP1-17 -----VGN-----VVDI-----  
 SbSCPYP1-8 -----VGN-----VVDI-----  
 OsSCPYP1-6 -----VGH-----VVDI-----  
 SbSCPYP1-12 -----VGH-----VVDI-----  
 OsSCPYP1-16 -----VGH-----VVDI-----  
 SbSCPYP1-1 -----VGH-----VVDI-----  
 OsSCPYP1-14 -----VGS-----IVGDV-----  
 SbSCPYP1-14 -----VGS-----IVGDI-----  
 MtSCPYP1-4 -----VGR-----VIGDV-----  
 MtSCPYP1-3 -----VGG-----VIGEV-----  
 MtSCPYP1-6 -----VCG-----VIGDV-----  
 FvSCPYP1-5 -----VSR-----VIGDI-----  
 AtSCPYP1-2 -----VGS-----VVDV-----  
 AtSCPYP1-4 -----VSR-----VVDV-----  
 SbSCPYP1-3 -----VGR-----IIGDV-----



FvSCPYP1-2 -----VGR-----VIGDV---  
 VvSCPYP1-2 -----VGR-----VVGDV---  
 OsSCPYP1-2 -----LGR-----VVGDV---  
 SbSCPYP1-15 -----VGR-----VVGDV---  
 OsSCPYP1-7 -----VGR-----IVGDV---  
 OsSCPYP1-8 -----VGR-----VVGDV---  
 VvSCPYP1-3 -----VGK-----VIGDV---  
 PpSCPYP1-1 -----VGR-----VIGDV---  
 PpSCPYP1-4 -----VGK-----VIGDV---  
 PpSCPYP1-5 -----VGK-----VIGDV---  
 PpSCPYP1-6 -----VGK-----VIGDV---  
 SmSCPYP1-3 -----LGR-----VIGDV---  
 MtSCPYP1-7 -----VGR-----VIGDV---  
 AtSCPYP1-3 -----VGR-----VIGDV---  
 FvSCPYP1-4 -----VGR-----VIGDV---  
 VvSCPYP1-4 -----VGR-----VIGDV---  
 OsSCPYP1-1 -----VGR-----VIGEV---  
 SbSCPYP1-4 -----VGR-----VIGEV---  
 OsSCPYP1-9 -----VGR-----VIGDV---  
 SbSCPYP1-16 -----VGR-----VIGDV---

SmSCPYP1-11 -----FH-HE-----GK  
 PpSCPYP1-3 -----FK-NG-----ER  
 MpSCPYP1-1 VDPTKWGEVPSPPAPAAATTTTTEAATTPAPRPASSAATVAKFL-EVNAGVQNAALPT  
 SmSCPYP1-15 TPP-----RS-PLPGSLAVEKS-IS  
 SmSCPYP1-14 KHLRRSNQTKSCLQGIKAITTQQRINEEACGATSSRLLASTPPRS-PSPRSLAVEKS-IS  
 SmSCPYP1-16 TPP-----RS-PSPGSLAVEKS-IS  
 SmSCPYP1-17 TPP-----RS-PSPGSLAVEKS-IS  
 SmSCPYP1-18 LSA-----YA-A-----MG  
 SmSCPYP1-1 -----S-----VG  
 SmSCPYP1-6 YQC-----EG-II-----VG  
 SmSCPYP1-2 -----S-----VG  
 SmSCPYP1-10 -----T-----VG  
 SmSCPYP1-8 YQC-----EG-II-----VG  
 SmSCPYP1-9 LEHPDVNCKKAVNALGHNCLCSLIVSSTGVLAKTTMKRYVESCQV-VPPEDYQCEGIIVG  
 SmSCPYP1-5 -----S-----VG  
 SmSCPYP1-7 -----S-----VG  
 PpSCPYP1-2 IDR-----FT-PT-----TT  
 MpSCPYP1-2 LET-----LG-IPRGL-----PT  
 CsSCPYP1-1 IDP-----A-PG-----VA  
 SmSCPYP1-12 VDS-----YDSPY-----VS  
 SmSCPYP1-13 VDS-----FHFPR-----PS  
 SmSCPYP1-4 VDD-----FV-PC-----CE  
 AtSCPYP1-5 LEM-----FN-PS-----VT  
 VvSCPYP1-1 VDG-----FT-PS-----VK  
 FvSCPYP1-1 VDM-----FT-PS-----VK  
 MtSCPYP1-8 VDI-----FN-PS-----VR  
 AtSCPYP1-6 LDF-----FT-PT-----TK  
 MtSCPYP1-1 VDY-----FT-ST-----MK  
 AtSCPYP1-1 VDN-----CL-QA-----VK  
 FvSCPYP1-3 IDC-----FT-PS-----VK  
 VvSCPYP1-6 VDS-----FC-ST-----VK  
 MtSCPYP1-5 LDS-----FT-TS-----MK  
 VvSCPYP1-5 LDP-----FP-PT-----IK  
 OsSCPYP1-13 IDS-----FN-PC-----TK  
 OsSCPYP1-15 LDT-----FN-PC-----MK  
 SbSCPYP1-9 LDS-----FS-PC-----VK  
 SbSCPYP1-13 LDS-----FN-PC-----VK  
 SbSCPYP1-11 IDN-----FN-PT-----VK  
 OsSCPYP1-5 IDN-----FN-PT-----VK  
 SbSCPYP1-7 LDH-----FN-PT-----VK  
 OsSCPYP1-4 LDN-----FN-PT-----VK  
 OsSCPYP1-12 LDP-----FI-ST-----IS  
 SbSCPYP1-5 LDS-----FT-PT-----IP  
 OsSCPYP1-10 LDQ-----FS-NS-----VP  
 SbSCPYP1-17 LDP-----FT-SS-----VP  
 OsSCPYP1-3 LDP-----FI-ST-----VD  
 SbSCPYP1-6 LDP-----FY-SS-----ID  
 SbSCPYP1-10 LDP-----FY-TT-----VD  
 OsSCPYP1-11 LDP-----FI-KS-----AA  
 SbSCPYP1-2 LDP-----FI-KS-----AT  
 MtSCPYP1-2 LSP-----FT-NS-----VS  
 OsSCPYP1-17 LDP-----FI-KS-----AS  
 SbSCPYP1-8 LDP-----FI-KS-----AS  
 OsSCPYP1-6 LDP-----FN-KS-----AS  
 SbSCPYP1-12 LDP-----FI-KT-----AS  
 OsSCPYP1-16 VDP-----FV-TT-----AS  
 SbSCPYP1-1 VDP-----FI-TT-----AS  
 OsSCPYP1-14 VDH-----FG-AS-----AL  
 SbSCPYP1-14 VDY-----FS-AS-----AL  
 MtSCPYP1-4 IDS-----FE-NS-----IP  
 MtSCPYP1-3 LDP-----FT-SS-----VS

MtSCPYP1-6 LDP-----FT-NS-----VS  
FvSCPYP1-5 IEP-----FT-KS-----VS  
AtSCPYP1-2 LDP-----FT-RL-----VS  
AtSCPYP1-4 LDP-----FN-RS-----IT  
SbSCPYP1-3 VDP-----FV-RR-----VP  
FvSCPYP1-2 LDP-----FT-KS-----VS  
VvSCPYP1-2 LDP-----FL-RS-----IT  
OsSCPYP1-2 VDP-----FV-RR-----VA  
SbSCPYP1-15 LDP-----FV-RT-----TN  
OsSCPYP1-7 LDP-----FV-RI-----TN  
OsSCPYP1-8 LDA-----FV-RS-----TN  
VvSCPYP1-3 VNM-----FT-PA-----AE  
PpSCPYP1-1 IDM-----FA-PS-----VD  
PpSCPYP1-4 IDT-----FV-PS-----VD  
PpSCPYP1-5 IDT-----FV-PR-----VD  
PpSCPYP1-6 IDT-----FV-PS-----VD  
SmSCPYP1-3 LDM-----FV-PA-----VD  
MtSCPYP1-7 VDM-----FI-PS-----VG  
AtSCPYP1-3 LDM-----FI-PT-----AN  
FvSCPYP1-4 VDM-----FV-PT-----VN  
VvSCPYP1-4 VDM-----FV-PT-----IN  
OsSCPYP1-1 VDL-----FV-PS-----IS  
SbSCPYP1-4 VDL-----FV-PS-----IS  
OsSCPYP1-9 VDL-----FV-PT-----TA  
SbSCPYP1-16 VDL-----FV-PT-----VA

SmSCPYP1-11 IPRKH-----T--GDGQ-GDQKDISPALEWYNVPEGTVS-----  
PpSCPYP1-3 IPPQY-----T--QDQQ-GARSNISPPLEWYNIPDETVC-----  
MpSCPYP1-1 LTVTY-----A--NHDV-VGGEHFQSSRDFAFVLNPPA-----VSW--SAI  
SmSCPYP1-15 IAVSY-----T--GKDTFADGTLTLC---PQTAIHPNVM-----VPG--DVD  
SmSCPYP1-14 IAVSY-----T--GKDTFADGTLTLC---PQTAIHPNVM-----VPG--DVD  
SmSCPYP1-16 IAVSY-----T--GKDTFADGTLTLC---PQTAIHPNVM-----VPG--DVD  
SmSCPYP1-17 IAVSY-----T--GKDTFADGTLTLC---PQTAIHPNVM-----VPG--DVD  
SmSCPYP1-18 LLVQY-----G--STTV-GNGNFIPL---SSTNSPPTVD-----IEGFRGNG  
SmSCPYP1-1 LLVQY-----G--STTV-GNGNFVSL---SSTDSAPTVD-----IEGFGKNG  
SmSCPYP1-6 LLVQY-----G--STTV-GNGNLVSL---SSTDSAPTVD-----IEGFGKNG  
SmSCPYP1-2 LLVQY-----G--STTV-GNGNFIPL---SSTDAAPTVD-----IQGFQKNG  
SmSCPYP1-10 LLVQY-----G--SVTV-GNGNFIPL---SSTDSAPTVD-----IEGFGKNG  
SmSCPYP1-8 LLVQY-----G--STTV-GNGNFVSL---SSTDSAPTVD-----IEGFGKNG  
SmSCPYP1-9 LLVQY-----G--STTV-GNGNFVSL---SSTGSAPTVD-----IEGFGKNG  
SmSCPYP1-5 LLVQY-----G--STTV-GNGNFISL---SSTGSAPTVD-----IEGYGKNG  
SmSCPYP1-7 LLVQY-----G--STTV-GNGNFVSL---SSTDSAPTVD-----IEGFGKNG  
PpSCPYP1-2 VRLIY-----ND--NLEV-LDGTKVSE---NDVSKQPKVE-----IEG-AFVM  
MpSCPYP1-2 LRVVYEKRTLGEREGNT--PRPI-APGERFSSRHDAFLQAAPVVSWRDLDAAVDG--EER  
CsSCPYP1-1 LKIQY-----G--DTPITTKGGRLLPR---PETLNAPSVQ-----VTDLVGNV  
SmSCPYP1-12 VSATF-----G--SRAVTTTGQMFQK---ADTQKPPVVS-----ISD-IHAK  
SmSCPYP1-13 LRVAY-----G--SQNV-TIERQFSP---AEVLLQPKVS-----ITN--AGN  
SmSCPYP1-4 MAVYY-----G--KDQV-TNGCELAP---FATSSPPNVQ-----IAGNFDDG  
AtSCPYP1-5 MRVTF-----N--SNTIVSNGHELAP---SLLLSKPRVE-----IGG--QDL  
VvSCPYP1-1 MSVTY-----NS--NKQV-ANGHELMP---SVVTAKPRVE-----VGG--EDL  
FvSCPYP1-1 MNVYV-----SSCNKQV-SNGHEIMP---SVIAAKPRVD-----IGG--EDM  
MtSCPYP1-8 MNVTY-----S--TKQV-ANGHELMP---SIVMKNPRVD-----IGG--EDM  
AtSCPYP1-6 MNVSY-----N--KKQV-SNGHELFP---SSVSSKPRVE-----IHG--GDL  
MtSCPYP1-1 MSVTY-----N--TKQV-YNGHEFFP---SSVTTKPKVQ-----IHG--GDM  
AtSCPYP1-1 MTVTY-----NS--DKQV-YNGHELFP---SVVTKPKVE-----VHG--GDM  
FvSCPYP1-3 MTVTY-----NS--SKKV-YNGHELYP---SSVTVKPKVE-----VHG--GDM  
VvSCPYP1-6 MTVTY-----NS--NKQV-YNGHELFP---SSVTIKPKIE-----VEG--GDM  
MtSCPYP1-5 MTVSY-----N--KKQV-FNGHEFFP---STINTKPKVE-----IDG--GDM  
VvSCPYP1-5 MTVTY-----H--NKQI-CNGYELYP---SSITVKPRVE-----VQG--GDL  
OsSCPYP1-13 MIVTY-----N--SNKLVFNGHEFYF---SAVVSCKPRVE-----VQG--GDM  
OsSCPYP1-15 MIVTY-----N--SNKLVFNGHELYP---SAVVSCKPRVE-----VQG--GDL  
SbSCPYP1-9 MVVTY-----N--SNKLVFNGHEIYP---SAVVSCKPRVE-----VQG--GDL  
SbSCPYP1-13 MIVTY-----N--SNKLVFNGHEIYP---SAVVSCKPRVE-----VQG--GDL  
SbSCPYP1-11 MTVTY-----GS--NNQV-FNGHEFFP---SAVLSKPRVE-----VQG--DDM  
OsSCPYP1-5 MTATY-----SS--NKQV-FNGHELFP---SAVVSCKPRVE-----VQG--GDL  
SbSCPYP1-7 MVVTY-----NS--NKQV-FNGHEFFP---SAVTAKPRVE-----VQG--GDL  
OsSCPYP1-4 MTATY-----GA--NKQV-FNGHEFFP---SAVAGKPRVE-----VQG--GDL  
OsSCPYP1-12 LRVTY-----N--SRLI-LAGAALKP---SAVVSCKPQVD-----VGG--NDM  
SbSCPYP1-5 LRIAY-----N--NRLI-LAGVELKP---SAVVNNPRVD-----VGG--TDL  
OsSCPYP1-10 LTVMY-----D--GRP V-FNGKEFRS---SAVSMKPRVE-----IGG--DDF  
SbSCPYP1-17 LTVMY-----D--GRP V-FDGMFRA---SAVSVKPRVE-----IGG--DDF  
OsSCPYP1-3 LTVMY-----GDDGMPV-ISGVELRA---PAVAEKPVVE-----VGG--DDL  
SbSCPYP1-6 LMVLF-----N--GMPI-VSGMELRA---PTVSERPRVE-----IGG--DDY  
SbSCPYP1-10 MMILF-----D--GTPI-ISGMELRA---PAVSDRPRVE-----IGG--DDY  
OsSCPYP1-11 MRINY-----G--EKEI-TNGTGVR S---SAVFTAPHVE-----IEG--RDQ  
SbSCPYP1-2 MRINY-----G--DKEI-TNGTGLRA---SAVFNAPHVE-----IEG--HDQ  
MtSCPYP1-2 LSALI-----N--NREI-SNGCIMKP---SQLVNRPRVN-----VGG--DDL  
OsSCPYP1-17 LRVLY-----S--NREL-TNGSELKP---SQVANEPRIE-----IAG--RDM  
SbSCPYP1-8 LRVLY-----N--NREL-TNGSELKP---SQVANEPRIE-----IAG--HDM  
OsSCPYP1-6 LKVLV-----N--NKEL-TNGSELKP---SQVANEPRIE-----IAG--RDI  
SbSCPYP1-12 LKVLV-----N--NKEL-TNGSELKP---SQVANEPRIE-----IGG--RDM  
OsSCPYP1-16 LRVFY-----N--SKEM-TNGSELKP---SQVLNQPRIY-----IEG--RDM

SbSCPYP1-1 LRVFY-----N--NKEM-TNGSDLKP---SQVMNEPRVH-----ISG--RDM  
OsSCPYP1-14 LRLFY-----N--HREM-TSGSELRP---SQVAGEPAVQ-----ITG-GRDG  
SbSCPYP1-14 LRVMY-----G--GREI-TCGSELRP---SQVAGEPTVH-----ITGGRRDG  
MtSCPYP1-4 LRVTY-----G--NRDV-NNGCELKP---SQIGNQPRVS-----VGG--NDL  
MtSCPYP1-3 LRVVY-----DN--NKEV-INSGELKP---SQIINSRVSQ-----VGG--NDL  
MtSCPYP1-6 LRVVY-----EN--NKEV-SNSGELKP---SQIVNPPRVQ-----VGG--NDL  
FvSCPYP1-5 LRVTY-----IN--NREF-TNGSELKP---SHVVRPRVD-----IGG--DDL  
AtSCPYP1-2 LKVTY-----G--HREV-TNGLDLRP---SQVLNKPIVE-----IGG--DDF  
AtSCPYP1-4 LKVTY-----G--QREV-TNGLDLRP---SQVQNKPRVE-----IGG--EDL  
SbSCPYP1-3 LRVAY-----A--AREI-SNGCELRP---SAIADQPRVE-----VGG--PDM  
FvSCPYP1-2 LRVTY-----T--SKEV-NNGCELKP---SQVVSQPRVD-----IGG--EDL  
VvSCPYP1-2 LRVTY-----N--NREV-ANGCEFRP---SQLVSQPRVD-----IGG--DDL  
OsSCPYP1-2 LRVAY-----G--AREV-ANGCELRP---SAVADQPRVA-----VGG--PDM  
SbSCPYP1-15 LRVSY-----G--TRTV-SNGCELKP---SMVNVQPRVE-----VGG--PDM  
OsSCPYP1-7 LSVSY-----G--ARIV-SNGCELKP---SMVTQQPRVV-----VGG--NDM  
OsSCPYP1-8 LKVTY-----G--SKTV-SNGCELKP---SMVTHQPRVE-----VGG--NDM  
VvSCPYP1-3 FTVHF-----G--SRQV-ANGRMIPP---SAAVDKPKVQ-----IHG--HRL  
PpSCPYP1-1 MAVVY-----T--SRKV-SNGCQMKP---SATNEAPT VH-----VTG--NNG  
PpSCPYP1-4 MAIHY-----S--TRQV-TNGCQMP---SATAQAPEIH-----LSD--KSG  
PpSCPYP1-5 MAIHY-----S--TRQV-TNGCQLKP---SATAQAPEIQ-----LSD--KSG  
PpSCPYP1-6 MAIHY-----S--SRQV-TNGCQMKP---SATAQAPEIQ-----LSD--NSE  
SmSCPYP1-3 MSVCY-----G--SKQV-NNGCELKP---SATQARP IVQ-----VGS--PHE  
MtSCPYP1-7 MSVYF-----G--PKHV-TNGCDIKP---SMAINPPKVT-----LTG--NM  
AtSCPYP1-3 MSVYF-----G--PKHI-TNGCEIKP---STAVNPPKVN-----ISG--HSD  
FvSCPYP1-4 MSVYF-----G--SKHV-TNGCDIKP---SIAVSPKVT-----FSG--HPG  
VvSCPYP1-4 MSVYY-----G--AKHV-TNGCDVKP---SLTVNPPKVT-----LSG--HPD  
OsSCPYP1-1 MTAAY-----G--DRDI-SNGCLVRP---SAADYPLVR-----ISG--RRN  
SbSCPYP1-4 MTVAY-----G--PKDI-SNGCLLKP---SATAAPPLVR-----ISG--RRN  
OsSCPYP1-9 MSVRF-----G--TKDL-TNGCEIKP---SVAAAPPAVQ-----IAG--RVN  
SbSCPYP1-16 MSVRF-----G--TKDV-TNGCEIKP---SLTAAAPVVQ-----IAG--RAN

SmSCPYP1-11 -----LALVVDDPDAPDKDPVVP-----VWHWVLINIPPTLKGIPAG  
PpSCPYP1-3 -----LVLIVEDPA-PQ-MERSPRS-----FCHWVVLNIPPTLKGLEPH  
MpSCPYP1-1 RPPLDPTKH----RAVIMFDDAPEPA-PGDGATPGANAPYLHAVWTTGGNA-----  
SmSCPYP1-15 PAQL-----YSIVMIDRQASQSMFTLADQFT-----YVHYWIANIPGS-----  
SmSCPYP1-14 PAQL-----YSIVMIDRRASQSMFTLADQFT-----YVHYWIANIPGS-----  
SmSCPYP1-16 PAQL-----YSIVMIDRRASRSMFTLADQFT-----YVHYWIANIPGS-----  
SmSCPYP1-17 PAQL-----YSIVMIDRRASRSMFTLADQFT-----YVHYWITNIPGS-----  
SmSCPYP1-18 SVRL-----FSVVMADQKALPSPNAVYP-----YINYWIANIPAGS-----  
SmSCPYP1-1 TTRL-----FSVVMADQKALVASNKVYP-----YINFWVANIPAGS-----  
SmSCPYP1-6 TTRL-----FSVVMADQKALVASNKVYP-----YINFWIANIPAGS-----  
SmSCPYP1-2 TARL-----FSVVMADQKALVAPNKVYP-----YINFWIANIPAGS-----  
SmSCPYP1-10 TARL-----FSVVMADQKALSAPT KVYP-----YINFWIANIPAGS-----  
SmSCPYP1-8 TTRL-----FSVVMADQKALVASNKVYP-----YINFWIANIPAGS-----  
SmSCPYP1-9 TTRL-----FSVVMADQKALVASNKVYP-----YINFWIANIPAGS-----  
SmSCPYP1-5 TVSL-----FSVVMADQKALSAQNKVYP-----YINFWIANIPAGS-----  
SmSCPYP1-7 TTRL-----FSVVMADQKALVASNKVYP-----YINFWIANIPAGS-----  
PpSCPYP1-2 PGSL-----YTIMLVSSAIGEG---KE-----RVHWHVNYQGPQ-----  
MpSCPYP1-2 RPRRPRP-----HVVMVDPDAPAPRTAGRRHLPGAAGPWLHALWKDCDGD-----  
CsSCPYP1-1 LSKLDPLKQLQADTKYTLVLSDDPASPAMPTSRE-----FLHWIVTNAPFG-----  
SmSCPYP1-12 KGDY-----FTLLMVDPDADVSPKPIYRN-----VLHWIVTNIPGT-----  
SmSCPYP1-13 R-DL-----FTLVMDPDPDPGPIPIILRN-----ILHWIVVNIPAQ-----  
SmSCPYP1-4 --SL-----FTLVMTDPDAPSPAEP SLGE-----YLHWLVTDIPGT-----  
AtSCPYP1-5 R-SF-----FTLIMTDPDAPSPSNPYMRE-----YLHWMVTDIPGT-----  
VvSCPYP1-1 R-AA-----YTLIMTDPDAPSPSDPYLKE-----HLHWIVADIPGT-----  
FvSCPYP1-1 R-AA-----YTLIMTDPDAPSPSDPCLRE-----HLHWMVTDIPGT-----  
MtSCPYP1-8 R-SA-----YTLIMTDPDAPSPSDPHLRE-----HLHWMVTDIPGT-----  
AtSCPYP1-6 R-SF-----FTLVMTDPDVPGPSDPFLKE-----HLHWIVTNIPGT-----  
MtSCPYP1-1 R-SF-----FTLVMTDPDVPGPSDPYLKE-----HLHWIVTDIPGT-----  
AtSCPYP1-1 R-SF-----FTLVMTDPDVPGPSDPYLRE-----HLHWIVTDIPGT-----  
FvSCPYP1-3 R-SF-----FTLVMTDPDVPGPSDPYLKE-----HLHWIVTDIPGT-----  
VvSCPYP1-6 R-SF-----FTLIMTDPDVPGPSDPYLRE-----HLHWIVTDIPGT-----  
MtSCPYP1-5 R-SF-----FTLVMTDPDVPGPSDPYLRE-----HLHWIVTDIPGT-----  
VvSCPYP1-5 R-SF-----FTLVMTDPDVPGPSDPYLRE-----HLHWIVTDIPGT-----  
OsSCPYP1-13 R-SF-----FTLVMTDPDVPGPSDPYLRE-----HLHWIVTDIPGT-----  
OsSCPYP1-15 R-SF-----FTLVMTDPDVPGPSDPYLRE-----HLHWIVTDIPGT-----  
SbSCPYP1-9 R-SF-----FTLVMTDPDVPGPSDPYLRE-----HLHWIVTDIPGT-----  
SbSCPYP1-13 R-SF-----FTLVMTDPDVPGPSDPYLRE-----HLHWIVTDIPGT-----  
SbSCPYP1-11 R-SF-----FTLVMTDPDVPGPSDPYLRE-----HLHWIVTDIPGT-----  
OsSCPYP1-5 R-SF-----FTLVMTDPDVPGPSDPYLRE-----HLHWIVTDIPGT-----  
SbSCPYP1-7 R-SF-----FTLVMTDPDVPGPSDPYLRE-----HLHWIVTDIPGT-----  
OsSCPYP1-4 R-SF-----FTLVMTDPDVPGPSDPYLRE-----HLHWIVTDIPGT-----  
OsSCPYP1-12 R-VS-----YTLVLVDPDAPSPSDPSLRE-----YLHWMVTDIPET-----  
SbSCPYP1-5 R-VF-----YTLVLVDPDAPSPSNPSLRE-----YLHWMVIDIPGT-----  
OsSCPYP1-10 R-FA-----YTLVMVDPDAPNPSNPTLRE-----YLHWMVTDIPSS-----  
SbSCPYP1-17 R-VA-----YTLVMVDPDAPNPSNPTLRE-----YLHWMVTDIPAS-----  
OsSCPYP1-3 R-VA-----YTLVMVDPDAPNPSNPTLRE-----YLHWMVTDIPAS-----  
SbSCPYP1-6 R-VA-----YTLVMVDPDAPNPSNPTLRE-----YLHWMVTDIPAS-----  
SbSCPYP1-10 R-VA-----YTLVMVDPDAPNPSNPTLRE-----YLHWMVTDIPAS-----  
OsSCPYP1-11 T-KL-----YTLVMVDPDAPSPSKPEYRE-----YLHWLVTDIPEA-----  
SbSCPYP1-2 T-KL-----YTLVMVDPDAPSPSKPEYRE-----YLHWLVTDIPEA-----  
MtSCPYP1-2 R-TF-----YTMVMVDADAPSPSNPFLKE-----YLHWMVTDIPAT-----

OsSCPYP1-17 R-TL-----YTLVMVDPDPSPPSNPTKRE-----YLHHLVTDIPET-----  
 SbSCPYP1-8 R-TL-----YTLVMVDPDPSPPSNPTKRE-----YLHHLVTDIPES-----  
 OsSCPYP1-6 R-NL-----YTLVMVDPDPSPPSNPTKRE-----YLHHLVTDIPES-----  
 SbSCPYP1-12 R-NL-----YTLVMVDPDPSPPSNPTKRE-----YLHHLVTDIPES-----  
 OsSCPYP1-16 R-TL-----YTLVMVDPDAPSPSNPTKRE-----YLHWMVTDIPET-----  
 SbSCPYP1-1 R-TL-----YTLVMVDPDAPSPSNPTKRE-----NLHHLVTDIPET-----  
 OsSCPYP1-14 R-AL-----YTLVMVDPDAPSPSNPSKRE-----YLHHLVTDVPEG-----  
 SbSCPYP1-14 TPAF-----YTLMLLDPDAPSPSNPTKRE-----YLHHLVTDIPEG-----  
 MtSCPYP1-4 R-NL-----YTLVMVDPDPSPPSNPTFKE-----YLHHLVTDIPGT-----  
 MtSCPYP1-3 R-TL-----YTLVMVNDAPSPSDPNMRE-----YLYWMVTNIPAT-----  
 MtSCPYP1-6 R-TL-----YTLVMVDPDAPSPSNPNMRE-----YLHWMVTNIPAT-----  
 FvSCPYP1-5 R-NF-----YTLIMVDPDAPNPSEPNLKE-----YLHHLVTDIPAT-----  
 AtSCPYP1-2 R-NF-----YTLVMVDPDVPSPPSNPHQRE-----YLHHLVTDIPAT-----  
 AtSCPYP1-4 R-NF-----YTLVMVDPDVPSPPSNPHLRE-----YLHHLVTDIPAT-----  
 SbSCPYP1-3 R-TF-----YTLVMVDPDAPSPSDPNLRE-----YLHHLVTDIPAT-----  
 FvSCPYP1-2 R-TF-----YTLVMVDPDAPSPSDPNLKE-----YLHHLVTDIPAT-----  
 VvSCPYP1-2 R-TF-----YTLVMVDPDAPSPSNPNLRE-----YLHHLVTDIPAT-----  
 OsSCPYP1-2 R-TF-----YTLVMVDPDAPSPSDPNLRE-----YLHHLVTDIPAT-----  
 SbSCPYP1-15 R-TF-----YTLVMVDPDAPSPSDPNLRE-----YLHHLVTDIPGT-----  
 OsSCPYP1-7 R-TF-----YTLVMVDPDAPSPSNPNLRE-----YLHHLVTDIPGT-----  
 OsSCPYP1-8 R-TF-----YTLVMVDPDAPSPSDPNLRE-----YLHHLVTDIPGT-----  
 VvSCPYP1-3 SSNL-----YTLVMVDPDAPSPSEPTFRE-----WLHWIVVDIPEG-----  
 PpSCPYP1-1 DNNF-----FTLIMTDPDAPSPSEPSLRE-----WVHWIVTDIPGN-----  
 PpSCPYP1-4 GNNL-----YTLIMIDPDAPSPSEPTLRE-----WLHWIVTDIPGN-----  
 PpSCPYP1-5 DNNY-----YTLVMTDPDAPSPSEPSLRE-----WLHWIVTDIPGN-----  
 PpSCPYP1-6 GNNY-----YTLIMTDPDAPSPSEPSLRE-----WLHWIVTDIPGN-----  
 SmSCPYP1-3 EGAL-----YTLVMVDPDAPSPSEPSMRE-----WVHWIVADIPGG-----  
 MtSCPYP1-7 D-NL-----YTLVMTDPDAPSPSEPSMRE-----LIHWIVVDIPGG-----  
 AtSCPYP1-3 E--L-----YTLVMTDPDAPSPSEPNMRE-----WVHWIVVDIPGG-----  
 FvSCPYP1-4 E--L-----YTLVMTDPDAPSPSEPSMRE-----WVHWILADIPGG-----  
 VvSCPYP1-4 E--F-----YTLVMTDPDAPSPSEPSMRE-----WVHWIVADIPGG-----  
 OsSCPYP1-1 D--L-----YTLIMTDPDAPSPSDPSMRE-----FLHWIVVNIPGG-----  
 SbSCPYP1-4 D--L-----YTLIMTDPDAPSPSDPTMRE-----YLHWIVTNIPGG-----  
 OsSCPYP1-9 E--L-----FALVMTDPDAPSPSEPTMRE-----WLHHLVVNIPGG-----  
 SbSCPYP1-16 D--L-----FTLVMTDPDAPSPSEPTMRE-----LIHWLVVNIPGG-----  
 ::: .

SmSCPYP1-11 FTTKGL-DEKSEFA-----  
 PpSCPYP1-3 FTTKEHDDDRDEL-----  
 MpSCPYP1-1 -----A-----  
 SmSCPYP1-15 -----  
 SmSCPYP1-14 -----  
 SmSCPYP1-16 -----  
 SmSCPYP1-17 -----  
 SmSCPYP1-18 -----S-----  
 SmSCPYP1-1 -----T-----  
 SmSCPYP1-6 -----T-----  
 SmSCPYP1-2 -----T-----  
 SmSCPYP1-10 -----T-----  
 SmSCPYP1-8 -----T-----  
 SmSCPYP1-9 -----T-----  
 SmSCPYP1-5 -----T-----  
 SmSCPYP1-7 -----T-----  
 PpSCPYP1-2 -----DIG-----  
 MpSCPYP1-2 -----T-----SAAATAPGEARPRARRFPSRTFFLS  
 CsSCPYP1-1 -----  
 SmSCPYP1-12 -----T-----  
 SmSCPYP1-13 -----S-----  
 SmSCPYP1-4 -----T-----  
 AtSCPYP1-5 -----T-----  
 VvSCPYP1-1 -----T-----  
 FvSCPYP1-1 -----T-----  
 MtSCPYP1-8 -----T-----  
 AtSCPYP1-6 -----T-----  
 MtSCPYP1-1 -----T-----  
 AtSCPYP1-1 -----T-----  
 FvSCPYP1-3 -----T-----  
 VvSCPYP1-6 -----T-----  
 MtSCPYP1-5 -----T-----  
 VvSCPYP1-5 -----T-----  
 OsSCPYP1-13 -----T-----  
 OsSCPYP1-15 -----T-----  
 SbSCPYP1-9 -----T-----  
 SbSCPYP1-13 -----T-----  
 SbSCPYP1-11 -----T-----  
 OsSCPYP1-5 -----T-----  
 SbSCPYP1-7 -----T-----  
 OsSCPYP1-4 -----T-----  
 OsSCPYP1-12 -----T-----  
 SbSCPYP1-5 -----T-----  
 OsSCPYP1-10 -----T-----  
 SbSCPYP1-17 -----T-----  
 OsSCPYP1-3 -----T-----

SbSCPYP1-6 -----T-----  
 SbSCPYP1-10 -----T-----  
 OsSCPYP1-11 -----I-----  
 SbSCPYP1-2 -----R-----  
 MtSCPYP1-2 -----T-----  
 OsSCPYP1-17 -----T-----  
 SbSCPYP1-8 -----T-----  
 OsSCPYP1-6 -----A-----  
 SbSCPYP1-12 -----A-----  
 OsSCPYP1-16 -----T-----  
 SbSCPYP1-1 -----T-----  
 OsSCPYP1-14 -----G-----  
 SbSCPYP1-14 -----A-----  
 MtSCPYP1-4 -----T-----  
 MtSCPYP1-3 -----T-----  
 MtSCPYP1-6 -----T-----  
 FvSCPYP1-5 -----T-----  
 AtSCPYP1-2 -----T-----  
 AtSCPYP1-4 -----T-----  
 SbSCPYP1-3 -----T-----  
 FvSCPYP1-2 -----A-----  
 VvSCPYP1-2 -----T-----  
 OsSCPYP1-2 -----T-----  
 SbSCPYP1-15 -----T-----  
 OsSCPYP1-7 -----T-----  
 OsSCPYP1-8 -----T-----  
 VvSCPYP1-3 -----C-----  
 PpSCPYP1-1 -----SSTTTSVIRQSVAGQGSKRAREPASSAKQPNERKKKGPAASTTDKE  
 PpSCPYP1-4 -----S-----GGSEMTSG  
 PpSCPYP1-5 -----S-----GGSETNTG  
 PpSCPYP1-6 -----S-----GGSETTSG  
 SmSCPYP1-3 -----A-----  
 MtSCPYP1-7 -----T-----  
 AtSCPYP1-3 -----T-----  
 FvSCPYP1-4 -----T-----  
 VvSCPYP1-4 -----T-----  
 OsSCPYP1-1 -----T-----  
 SbSCPYP1-4 -----T-----  
 OsSCPYP1-9 -----T-----  
 SbSCPYP1-16 -----A-----

SmSCPYP1-11 -----EIQE--GYNDWKLPGYRGNPP-----VGTHRYVFKLYAL---  
 PpSCPYP1-3 -----QIRE--GINDFKVPSYFGPKPP-----VGEHNYEFRLYAL---  
 MpSCPYP1-1 -----TAPLAVP-RL--AVPYEPPVPP-----KGTHRYVFLFEQ---  
 SmSCPYP1-15 -----KVDA--G-TI--LEEYMRPAPH-----DFMLHKYEFILYKQ---  
 SmSCPYP1-14 -----KVDA--G-TI--LEEYMRPAPH-----DFMQHKYEFILYKQ---  
 SmSCPYP1-16 -----KVDA--G-TI--LEEYMRPAPH-----DFMQHKYEFILYKQ---  
 SmSCPYP1-17 -----KVDA--G-TI--LEEYMRPAPH-----DFMQHKYEFILYKQ---  
 SmSCPYP1-18 -----GTVN--G-SI--LEPYVAPSNTSNNIHYPNPFSAKNHTYDFVLVPQ---  
 SmSCPYP1-1 -----GAVK--G-SI--LEPYVSPSNTSKNIPYPNPFNARNHTYDFVLVPQ---  
 SmSCPYP1-6 -----GAVK--G-SI--LEPYVSPSNTSKNIPYPNPFNARNHTYDFVLVPQ---  
 SmSCPYP1-2 -----GAVK--S-SI--LEPYVAPSNTSKNIPYQNPFSAKNHTYDFVLVPQ---  
 SmSCPYP1-10 -----GAVK--G-SI--LEPYVSPSNTSKNIPYPNPFNARNHTYDFVLVPQ---  
 SmSCPYP1-8 -----GAVK--G-SI--LEPYVSPSNTSKNIPYPNPFNARNHTYDFVLVPQ---  
 SmSCPYP1-5 -----GAVK--G-SI--LEPYVSPSNTSKNIPYPNPFNAKNHTYDFVLVPQ---  
 SmSCPYP1-7 -----GAVK--G-SI--LEPYVSPSNTSKNIPYPNPFNARNHTYDFVLVLQ---  
 PpSCPYP1-2 -----SAVIRAG-AD--VLHCEAPKAG-----SNSNQLVFLFRQ---  
 MpSCPYP1-2 -----PPARGEDAHEEDLSRVPGL--L--LVPYNGPSPP-----SGHRYVFLFEQTDD  
 CsSCPYP1-1 -----DITK--G-EV--AVPYAPPSPP-----AGVHRYVFLFQ---  
 SmSCPYP1-12 -----KDVFKHG-TN--AVSYAGPSPP-----MGVHRYVFLVFKQ---  
 SmSCPYP1-13 -----TNASEQ--G-DH--LAPYLSPTPV-----QGVHRYVFLFRQ---  
 SmSCPYP1-4 -----DPSK--G-KG--VLPYERPKPP-----AGTHRYVFLFKQ---  
 AtSCPYP1-5 -----DASF--G-RE--IVRYETPKPV-----AGIHRVVFALFKQ---  
 VvSCPYP1-1 -----DASF--G-KE--IVSYEPPKPV-----IGIHRVVFLLFKQ---  
 FvSCPYP1-1 -----DVSF--G-RE--VVEYETPKPV-----VGIHRVVFLLFQ---  
 MtSCPYP1-8 -----DVSF--G-NE--IVEYENPKPV-----IGIHRVVFLLFKQ---  
 AtSCPYP1-6 -----DATF--G-KE--VVSVELPRPS-----IGIHRFVFLFRQ---  
 MtSCPYP1-1 -----DATF--G-KE--VMKYEMPRPN-----IGIHRFVFLLYKQ---  
 AtSCPYP1-1 -----DVSF--G-KE--IIGYEMPRPN-----IGIHRFVFLFKQ---  
 FvSCPYP1-3 -----DNTF--G-KE--VVKYEMPRPN-----IGIHRFVFLFKQ---  
 VvSCPYP1-6 -----DSTF--G-KE--IVNYEMPRPN-----IGIHRFVFLFKQ---  
 MtSCPYP1-5 -----DATF--G-KE--VVSYEIPKPN-----IGIHRFVFLFKQ---  
 VvSCPYP1-5 -----DATF--G-RE--VLSYEIPKPN-----IGIHRFVFLFKQ---  
 OsSCPYP1-13 -----DASF--G-RE--IISYESPKPS-----IGIHRFVFLFKQ---  
 OsSCPYP1-15 -----DASF--G-RE--VISYESPKPN-----IGIHRFVFLFKQ---  
 SbSCPYP1-9 -----DASF--G-RE--VISYESPRPS-----IGIHRFVFLFKQ---  
 SbSCPYP1-13 -----DASF--G-RE--VISYESPRPN-----IGIHRFVFLFKQ---  
 SbSCPYP1-11 -----DASF--G-TE--LAMYESPYP-----IGIHRFVFLFKQ---  
 OsSCPYP1-5 -----DASF--G-RE--VVSYESPKPN-----IGIHRFVFLFKQ---  
 SbSCPYP1-7 -----DASF--G-RE--VVSYESPRPN-----IGIHRFVFLFRQ---  
 OsSCPYP1-4 -----DASF--G-RE--VVSYESPRPN-----IGIHRFVFLFRQ---

OsSCPYP1-12 -----SISF--G-EE--LILYKPEPR-----SGIHRMVFLFRQ---  
 SbSCPYP1-5 -----GANF--G-QE--LMFYERPEPR-----SGIHRMVFLFRQ---  
 OsSCPYP1-10 -----DDSF--G-RE--IVTYESPSPPT-----MGIHRIVMVLVYQQ---  
 SbSCPYP1-17 -----DDSF--G-RE--LIPYENPSPT-----MGIHRIVLVLVYQQ---  
 OsSCPYP1-3 -----DATY--G-RE--VVCYESPNT-----TGIHRMVLVFLFRQ---  
 SbSCPYP1-6 -----DDTY--G-RE--VMCYEAPNPT-----TGIHRMVLVFLFRQ---  
 OsSCPYP1-10 -----DNTY--G-RE--MbcYEPAPPS-----TGIHRMVLVFLFQQ---  
 OsSCPYP1-11 -----DARF--G-NE--IVPYEAPRPP-----AGIHRVLVFLFKQ---  
 SbSCPYP1-2 -----DIRF--G-NE--IVPYESPRPP-----AGIHRIVLFLFKQ---  
 MtSCPYP1-2 -----SASF--G-KE--VVFYESPSPKPS-----AGIHRFVIALFKQ---  
 OsSCPYP1-17 -----NASF--G-NE--IVSYESPSPKPT-----AGIHRFVFLFRQ---  
 SbSCPYP1-8 -----NVSF--G-NE--VVSYESPKPS-----AGIHRFVFLFRQ---  
 OsSCPYP1-6 -----NASY--G-NE--VVSYESPKPT-----AGIHRFVFLFRQ---  
 SbSCPYP1-12 -----NASY--G-NE--IVSYENPKPT-----AGIHRFVFLFRQ---  
 OsSCPYP1-16 -----DARF--G-NE--IVPYESPRPT-----AGIHRFVFLFRQ---  
 SbSCPYP1-1 -----DASF--G-NE--IVPYESPRPT-----AGIHRFVFLFRQ---  
 OsSCPYP1-14 -----DTSK--G-TE--VWAYESPRPT-----AGIHRVLVFLVFRQ---  
 SbSCPYP1-14 -----GANH--G-NE--VWAYESPRPT-----AGIHRFVFLVFRQ---  
 MtSCPYP1-4 -----EVTF--G-NE--VVNYERPRPT-----SGIHRFVFLFRQ---  
 MtSCPYP1-3 -----GTTF--G-QE--IVSYESPRPA-----SGIHRVFLVFRQ---  
 MtSCPYP1-6 -----GTTF--G-QE--IVSYENPRPT-----SGIHRVFLVFRQ---  
 FvSCPYP1-5 -----GASF--G-QE--IVSYESPRPA-----MGIHRFVSVLYRQ---  
 AtSCPYP1-2 -----GNAF--G-NE--VVCYESPSPPP-----SGIHRIVLVLFRQ---  
 AtSCPYP1-4 -----GTTF--G-NE--IVCYENPSPT-----AGIHRVFLVFRQ---  
 SbSCPYP1-3 -----GVSF--G-TE--VVCYESPSPV-----LGIHRMVLVLLFQQ---  
 FvSCPYP1-2 -----GAVF--G-QE--IVCYESPRPT-----AGIHRFVFLFRQ---  
 VvSCPYP1-2 -----GANF--G-QE--IVCYESPRPT-----AGIHRFVFLFRQ---  
 OsSCPYP1-2 -----GVSF--G-TE--VVCYESPSPV-----LGIHRVLVLLFEQ---  
 SbSCPYP1-15 -----GAAF--G-QE--VICYESPRPT-----MGIHRFVFLVFLFQQ---  
 OsSCPYP1-7 -----GATF--G-QE--VMCYESPRPT-----MGIHRVLVFLVFLFQQ---  
 OsSCPYP1-8 -----AASF--G-QE--VMCYESPRPT-----MGIHRVLVFLVFLFQQ---  
 VvSCPYP1-3 -----DATQ--G-RE--VVPYMGPP-----TGIHRYIFLFLFKQ---  
 PpSCPYP1-1 LPSAADQGAAPRPTS--G-KE--VVPYVGPCPP-----IGIHRVFLVFLFKQ---  
 PpSCPYP1-4 FPRLNEL-IAPSKSC--G-RE--LVPYMGPP-----VGIHRYIFLFLFKQ---  
 PpSCPYP1-5 FSWLSEQ-ATSTSSS--G-RE--LVPYIGPRPP-----IGIHRVFLVFLFKQ---  
 PpSCPYP1-6 FSWLSEQ-VHTSSS--G-RE--LVPYMGPP-----IGIHRVFLVFLFKQ---  
 SmSCPYP1-3 -----DASQ--G-RE--ILQYIGPKPP-----TGIHRYIFVFLFRQ---  
 MtSCPYP1-7 -----NPKR--G-KE--ILPYIGPKPP-----VGIHRYILVFLFEQ---  
 AtSCPYP1-3 -----NPSR--G-KE--ILPYMEPRPP-----VGIHRYILVFLFRQ---  
 FvSCPYP1-4 -----NPIR--G-KE--ILPYVGRPP-----VGIHRYILVFLFQQ---  
 VvSCPYP1-4 -----NATR--G-KE--ALPYVGRPP-----VGIHRYILVFLFQQ---  
 OsSCPYP1-1 -----DASK--G-EE--MVEYMGPRPT-----VGIHRYVLVFLFEQ---  
 SbSCPYP1-4 -----DASK--G-EE--VVEYMGPRPP-----VGIHRYVLVFLFEQ---  
 OsSCPYP1-9 -----DPSQ--G-DV--VVPYMGPP-----VGIHRYVMVFLFQQ---  
 SbSCPYP1-16 -----DPSQ--GSET--VMPYLGPCPP-----VGIHRYVLVFLVYQQ---  
 \* : :

SmSCPYP1-11 -----D-----TK-LKL-----  
 PpSCPYP1-3 -----D-----AY-PKV-----  
 MpSCPYP1-1 -----A-----GE-KPI-----  
 SmSCPYP1-15 -----Q-----GQ-----  
 SmSCPYP1-14 -----Q-----GQ-----  
 SmSCPYP1-16 -----Q-----GQ-----  
 SmSCPYP1-17 -----Q-----GQ-----  
 SmSCPYP1-18 -----R-NPL-----  
 SmSCPYP1-1 -----RNPLEEQGHVALVSIKHNIHFTLRMLLKHHAKEEPYKIPSLWVGGRIPPV-----  
 SmSCPYP1-6 -----R-NPL-----  
 SmSCPYP1-2 -----R-NPL-----  
 SmSCPYP1-10 -----R-NPL-----  
 SmSCPYP1-8 -----R-NPL-----  
 SmSCPYP1-9 -----R-NPL-----  
 SmSCPYP1-5 -----R-NPL-----  
 SmSCPYP1-7 -----R-NPL-----  
 PpSCPYP1-2 -----P-----G-QLV-----  
 MpSCPYP1-2 AEVRAD-----GR-GVE-----  
 CsSCPYP1-1 -----PK-----GT-NLN-----  
 SmSCPYP1-12 -----K-----GK-ITA-----  
 SmSCPYP1-13 -----KQ-----IH-AGS-----  
 SmSCPYP1-4 -----SR-PMM-----  
 AtSCPYP1-5 -----R-----GR-QAV-----  
 VvSCPYP1-1 -----R-----GR-ETV-----  
 FvSCPYP1-1 -----TR-----GR-QTV-----  
 MtSCPYP1-8 -----R-----GR-QTV-----  
 AtSCPYP1-6 -----K-----QR-RVI-----  
 MtSCPYP1-1 -----K-----RR-QTV-----  
 AtSCPYP1-1 -----T-----RR-GSV-----  
 FvSCPYP1-3 -----K-----GR-QTV-----  
 VvSCPYP1-6 -----K-----RR-QTV-----  
 MtSCPYP1-5 -----K-----NR-ESV-----  
 VvSCPYP1-5 -----K-----RR-QTV-----  
 OsSCPYP1-13 -----K-----RR-QAV-----  
 OsSCPYP1-15 -----K-----RR-QTV-----  
 SbSCPYP1-9 -----K-----RR-QTV-----

|            |             |             |
|------------|-------------|-------------|
| SbSCPYI-13 | ----K-----  | GR-QTV----  |
| SbSCPYI-11 | ----K-----  | SR-QSV----  |
| OsSCPYI-5  | ----K-----  | RR-QAV----  |
| SbSCPYI-7  | ----K-----  | RR-QAV----  |
| OsSCPYI-4  | ----K-----  | RR-QAV----  |
| OsSCPYI-12 | ----L-----  | GR-RTV----  |
| SbSCPYI-5  | ----L-----  | GR-GTV----  |
| OsSCPYI-10 | ----L-----  | GR-GTV----  |
| SbSCPYI-17 | ----L-----  | GR-GTV----  |
| OsSCPYI-3  | ----L-----  | GR-ETV----  |
| SbSCPYI-6  | ----L-----  | GR-ETV----  |
| SbSCPYI-10 | ----L-----  | GR-DTV----  |
| OsSCPYI-11 | ----E-----  | AR-QTV----  |
| SbSCPYI-2  | ----Q-----  | AR-QTV----  |
| MtSCPYI-2  | ----L-----  | GR-DTV----  |
| OsSCPYI-17 | ----S-----  | VQ-QTI----  |
| SbSCPYI-8  | ----S-----  | VR-QTI----  |
| OsSCPYI-6  | ----Y-----  | VQ-QTI----  |
| SbSCPYI-12 | ----S-----  | VQ-QTV----  |
| OsSCPYI-16 | ----S-----  | VR-QTT----  |
| SbSCPYI-1  | ----S-----  | VR-QTT----  |
| OsSCPYI-14 | ----T-----  | VR-QSI----  |
| SbSCPYI-14 | ----A-----  | IR-QSI----  |
| MtSCPYI-4  | ----Q-----  | CR-QRV----  |
| MtSCPYI-3  | ----P-----  | CR-HTV----  |
| MtSCPYI-6  | ----P-----  | CR-HTV----  |
| FvSCPYI-5  | ----L-----  | GR-KTV----  |
| AtSCPYI-2  | ----L-----  | GR-QTV----  |
| AtSCPYI-4  | ----L-----  | GR-QTV----  |
| SbSCPYI-3  | ----L-----  | GR-QTV----  |
| FvSCPYI-2  | ----L-----  | GR-QTV----  |
| VvSCPYI-2  | ----L-----  | GR-QTV----  |
| OsSCPYI-2  | ----L-----  | GR-QTV----  |
| SbSCPYI-15 | ----L-----  | GR-QTV----  |
| OsSCPYI-7  | ----L-----  | GR-QTV----  |
| OsSCPYI-8  | ----L-----  | GR-QTV----  |
| VvSCPYI-3  | ----K-----  | AAAMSG----  |
| PpSCPYI-1  | ----PT----- | GK-PLL----  |
| PpSCPYI-4  | ----P-----  | LT-PFH----  |
| PpSCPYI-5  | ----P-----  | SQ-SFL----  |
| PpSCPYI-6  | ----P-----  | ST-PFL----  |
| SmSCPYI-3  | ----M-----  | GP-VLM----  |
| MtSCPYI-7  | ----K-----  | GP-IGM----  |
| AtSCPYI-3  | ----N-----  | SPVGLM----  |
| FvSCPYI-4  | ----K-----  | AP-MGL----  |
| VvSCPYI-4  | ----K-----  | AP-LGL----  |
| OsSCPYI-1  | ----K-----  | ARFVDGA---- |
| SbSCPYI-4  | ----K-----  | TRVH----    |
| OsSCPYI-9  | ----K-----  | AR-----     |
| SbSCPYI-16 | ----K-----  | AR--F----   |

|            |                                                           |
|------------|-----------------------------------------------------------|
| SmSCPYI-11 | -----GHKATKDKVEIAVQGHVLGETELIG-----                       |
| PpSCPYI-3  | -----PKKPNVDRLKEAMEGHILKEAVLTG-----                       |
| MpSCPYI-1  | -----VVSE-----GAETQRR-----                                |
| SmSCPYI-15 | -----INTP-LADRTKIEKKRY-----                               |
| SmSCPYI-14 | -----INTPLADRFVK--DWEA-----                               |
| SmSCPYI-16 | -----INTPLADRFVK--DWEA-----                               |
| SmSCPYI-17 | -----INTPLADRFVN--DWEA-----                               |
| SmSCPYI-18 | -----VKPM-----DSRI-----                                   |
| SmSCPYI-1  | -----ASLP-----RVAWEQ-----                                 |
| SmSCPYI-6  | WTLVSIKHKIHFTLRMLLKHHVEEA-----IWNDVREMKLIILEVIQFAEYPYRPST |
| SmSCPYI-2  | -----VKPM-----DSRI-----                                   |
| SmSCPYI-10 | -----VKPM-----DSRL-----                                   |
| SmSCPYI-8  | -----VKPM-----DSRL-----                                   |
| SmSCPYI-9  | -----VKPM-----DSRL-----                                   |
| SmSCPYI-5  | -----VKPM-----DSRL-----                                   |
| SmSCPYI-7  | -----VKPM-----DSRL-----                                   |
| PpSCPYI-2  | -----VPTA-----HSND-----                                   |
| MpSCPYI-2  | -----EPAA-----FERK-----                                   |
| CsSCPYI-1  | -----VPAP-----ASRA-----                                   |
| SmSCPYI-12 | -----GKI-----TRRQ-----                                    |
| SmSCPYI-13 | -----LVGS-----LSRT-----                                   |
| SmSCPYI-4  | -----ALAP-----VIRS-----                                   |
| AtSCPYI-5  | -----KAAP-----ETRE-----                                   |
| VvSCPYI-1  | -----MP-P-----ASRD-----                                   |
| FvSCPYI-1  | -----RV-P-----ASRD-----                                   |
| MtSCPYI-8  | -----RS-P-----SSRD-----                                   |
| AtSCPYI-6  | -----FPNI-----PSRD-----                                   |
| MtSCPYI-1  | -----MKIP-----TSRD-----                                   |
| AtSCPYI-1  | -----VSVF-----SYRD-----                                   |
| FvSCPYI-3  | -----IP-P-----PSKD-----                                   |
| VvSCPYI-6  | -----NP-P-----SSRD-----                                   |

|             |                             |
|-------------|-----------------------------|
| MtSCPYP1-5  | -----TASP-----SSRD-----     |
| VvSCPYP1-5  | -----NT-P-----TSRD-----     |
| OsSCPYP1-13 | -----VV-P-----SSRD-----     |
| OsSCPYP1-15 | -----IV-P-----SFRD-----     |
| SbSCPYP1-9  | -----AM-P-----SSRD-----     |
| SbSCPYP1-13 | -----TV-P-----SSRD-----     |
| SbSCPYP1-11 | -----RP-P-----SSRD-----     |
| OsSCPYP1-5  | -----TP-P-----SSRD-----     |
| SbSCPYP1-7  | -----NP-P-----SSKD-----     |
| OsSCPYP1-4  | -----SP-P-----PSRD-----     |
| OsSCPYP1-12 | -----FA-P-----EKRH-----     |
| SbSCPYP1-5  | -----FA-P-----DMRH-----     |
| OsSCPYP1-10 | -----FA-P-----QVRQ-----     |
| SbSCPYP1-17 | -----FA-P-----QVRQ-----     |
| OsSCPYP1-3  | -----YA-P-----AVRH-----     |
| SbSCPYP1-6  | -----YA-P-----SWRH-----     |
| SbSCPYP1-10 | -----FAAP-----SRRH-----     |
| OsSCPYP1-11 | -----YA-P-----GWRQ-----     |
| SbSCPYP1-2  | -----YA-P-----GWRQ-----     |
| MtSCPYP1-2  | -----FA-P-----DWRH-----     |
| OsSCPYP1-17 | -----YA-P-----GWRQ-----     |
| SbSCPYP1-8  | -----YA-P-----GWRQ-----     |
| OsSCPYP1-6  | -----YA-P-----GWRP-----     |
| SbSCPYP1-12 | -----YA-P-----GWRQ-----     |
| OsSCPYP1-16 | -----YA-P-----GWRQ-----     |
| SbSCPYP1-1  | -----YA-P-----GWS-----      |
| OsSCPYP1-14 | -----YA-P-----GWS-----      |
| SbSCPYP1-14 | -----YA-P-----GWRA-----     |
| MtSCPYP1-4  | -----YA-P-----GWRQ-----     |
| MtSCPYP1-3  | -----LA-P-----GWRQ-----     |
| MtSCPYP1-6  | -----LA-P-----GWRQ-----     |
| FvSCPYP1-5  | -----YA-P-----EWRQ-----     |
| AtSCPYP1-2  | -----YA-P-----GWRQ-----     |
| AtSCPYP1-4  | -----YA-P-----GWRQ-----     |
| SbSCPYP1-3  | -----YA-P-----GWRQ-----     |
| FvSCPYP1-2  | -----YA-P-----GWRQ-----     |
| VvSCPYP1-2  | -----YA-P-----GWRQ-----     |
| OsSCPYP1-2  | -----YA-P-----GWRQ-----     |
| SbSCPYP1-15 | -----YA-P-----GWRQ-----     |
| OsSCPYP1-7  | -----YA-P-----GWRQ-----     |
| OsSCPYP1-8  | -----YA-P-----GWRQ-----     |
| VvSCPYP1-3  | -----TLPP-----DTRS-----     |
| PpSCPYP1-1  | -----VTAP-----SVRN-----     |
| PpSCPYP1-4  | -----ITPP-----TVRS-----     |
| PpSCPYP1-5  | -----ISPP-----AARN-----     |
| PpSCPYP1-6  | -----ISPP-----TVRN-----     |
| SmSCPYP1-3  | -----LP-P-----LMRN-----     |
| MtSCPYP1-7  | -----VEQP-----TSRV-----     |
| AtSCPYP1-3  | -----VQPP-----PSRA-----     |
| FvSCPYP1-4  | -----VEQP-----PTR-----      |
| VvSCPYP1-4  | -----VEQP-----GSRA-----     |
| OsSCPYP1-1  | -----LMPP-----ADRP-----     |
| SbSCPYP1-4  | -----AEAP-----RERA-----     |
| OsSCPYP1-9  | -----VAAP-----PPEDAARA----- |
| SbSCPYP1-16 | -----RAPPVLAPGAEVEASRA----- |

|             |                                                              |
|-------------|--------------------------------------------------------------|
| SmSCPYP1-11 | -----HY-----TKEN-----F-STGHDSYV-----PPPGGPL-----             |
| PpSCPYP1-3  | -----HY-----SKDQ-----Y-GTGNEKGY-----YPSGVPQ-----             |
| MpSCPYP1-1  | -----EW-----DLKA-----F-LAKNPGAR-----AAAVNH-----              |
| SmSCPYP1-15 | -----DYSLEWCMEPGADRRNSHRITV-AAALNYSS-----PSIAKHAKPMKNGT----- |
| SmSCPYP1-14 | -----V-ASAYNLGS-----PVATTS-----                              |
| SmSCPYP1-16 | -----V-ASAYNLGS-----PVATTS-----                              |
| SmSCPYP1-17 | -----V-ASAYNLGS-----PVATTS-----                              |
| SmSCPYP1-18 | -----VL-----SLAD-----I-IRQYHCGS-----PLQTVS-----              |
| SmSCPYP1-1  | -----LW-----RTAACS-----LPTQQHSHSLNVQIWELLEQVVS-----          |
| SmSCPYP1-6  | RGVPPFSLHGNNF-----DVQRPVAS-LLTQQHSHSL-NVWGPESRMN-----        |
| SmSCPYP1-2  | -----VN-----SLAD-----I-IQQYHCGS-----PLQTVS-----              |
| SmSCPYP1-10 | -----VN-----SLAD-----I-IGQYHCGS-----PLQTVS-----              |
| SmSCPYP1-8  | -----VN-----SLAD-----I-IQQYHCGS-----PLQTVS-----              |
| SmSCPYP1-9  | -----VN-----SLAD-----I-VQQYHCGS-----PLQTVS-----              |
| SmSCPYP1-5  | -----VN-----SLAD-----I-IQQYHCGS-----PLQTVS-----              |
| SmSCPYP1-7  | -----VN-----SLAD-----I-IQQYHCGS-----PLQTVS-----              |
| PpSCPYP1-2  | -----EI-----SARS-----F-AATHHL-T-----PVGALC-----              |
| MpSCPYP1-2  | -----RW-----DFKK-----F-LEQNPGLR-----PRAVNY-----              |
| CsSCPYP1-1  | -----RF-----NTQK-----F-SQLYDLGE-----PVAAAY-----              |
| SmSCPYP1-12 | -----QF-----SVRK-----F-SDEYSLGF-----PVGQVY-----              |
| SmSCPYP1-13 | -----LF-----SVRV-----F-TENYDLGY-----PVDGVF-----              |
| SmSCPYP1-4  | -----NF-----STKC-----F-AQEHGLGL-----AVAALY-----              |
| AtSCPYP1-5  | -----CF-----NTNA-----F-SSYFGLSQ-----PVAAVY-----              |
| VvSCPYP1-1  | -----HF-----NTRK-----F-AEDNGLGS-----PVAAVY-----              |
| FvSCPYP1-1  | -----NF-----NTRK-----F-SQENSLGL-----PVAAVY-----              |
| MtSCPYP1-8  | -----NF-----NTRR-----F-SQENNLGL-----PVAAVY-----              |



AtSCPyl-6 -----HF-----NTRK-----F-AVEYDLGL-----PVAAVF-----  
 MtSCPyl-1 -----LF-----NTKK-----F-AQNDLGP-----PVAAVF-----  
 AtSCPyl-1 -----QF-----NTRE-----F-AHENDLGL-----PVAAVF-----  
 FvSCPyl-3 -----HF-----DSRK-----F-AETNEFGL-----PVAAVF-----  
 VvSCPyl-6 -----RF-----STRN-----F-AEENELGP-----PVAAVF-----  
 MtSCPyl-5 -----YF-----NTRN-----F-ASQNDLGL-----PVAAVF-----  
 VvSCPyl-5 -----HF-----NTRS-----F-AAENDLGL-----PVAAVF-----  
 OsSCPyl-13 -----HF-----NTRQ-----F-AEENELGL-----PVAAVF-----  
 OsSCPyl-15 -----HF-----NTRR-----F-AEENDLGL-----PVAAVF-----  
 SbSCPyl-9 -----HF-----ITRQ-----F-AEENDLGL-----PVAAVF-----  
 SbSCPyl-13 -----HF-----NTRQ-----F-AEENDLGL-----PVAAVF-----  
 SbSCPyl-11 -----YF-----STRR-----F-AADNDLGL-----PVAAVF-----  
 OsSCPyl-5 -----YF-----STRR-----F-AADNDLGL-----PVAAVF-----  
 SbSCPyl-7 -----RF-----STRQ-----F-AEDNDLGL-----PVAAVF-----  
 OsSCPyl-4 -----RF-----STRQ-----F-AEDNDLGL-----PVAAVF-----  
 OsSCPyl-12 -----NF-----NCRI-----F-ARQHHLNI-----VAATY-----  
 SbSCPyl-5 -----NF-----NCKN-----F-ARQYHLDI-----VAATY-----  
 OsSCPyl-10 -----NF-----NLRN-----F-ARRFNLGK-----PVAAMY-----  
 SbSCPyl-17 -----NF-----NLRN-----F-ARRFNLGK-----PVAAMY-----  
 OsSCPyl-3 -----NF-----TTRA-----F-ARRYNLGA-----PVAAVF-----  
 SbSCPyl-6 -----NF-----STRG-----F-ARRYNLGA-----PVAAMY-----  
 SbSCPyl-10 -----NF-----NTRA-----F-ARRYNLGA-----PVAAMY-----  
 OsSCPyl-11 -----NF-----NVRD-----F-SAFYNLGP-----PVAALY-----  
 SbSCPyl-2 -----NF-----NIRD-----F-SAIYNLGA-----PVAALY-----  
 MtSCPyl-2 -----NF-----NTTN-----F-AEINNLVI-----VASVY-----  
 OsSCPyl-17 -----NF-----NTRD-----F-SALYNLGP-----PVAAVF-----  
 SbSCPyl-8 -----NF-----NTRD-----F-SAFYNLGP-----PVAASF-----  
 OsSCPyl-6 -----NF-----NTRD-----F-SALYNLGP-----PVAAVF-----  
 SbSCPyl-12 -----NF-----NTRD-----F-SALYNLGP-----PVAAVF-----  
 OsSCPyl-16 -----NF-----NTRD-----F-AELYNLGS-----PVAALF-----  
 SbSCPyl-1 -----NF-----NTRD-----F-AAIYNLGS-----PVAAVF-----  
 OsSCPyl-14 -----NF-----NTRD-----F-AACYSLGS-----PVAAYY-----  
 SbSCPyl-14 -----NF-----NTRD-----F-AACYSLGP-----PVAATY-----  
 MtSCPyl-4 -----NF-----NTRE-----F-AELYNLGS-----PVAAVF-----  
 MtSCPyl-3 -----NF-----ITRD-----F-AEFYNLGL-----PVAALY-----  
 MtSCPyl-6 -----NF-----ITRD-----F-AEFYNLGL-----PVAALY-----  
 FvSCPyl-5 -----NF-----NTRK-----F-AENYNLGS-----PVAAVF-----  
 AtSCPyl-2 -----QF-----NTRE-----F-AEIYNLGL-----PVAASF-----  
 AtSCPyl-4 -----NF-----NTRE-----F-AEIYNLGL-----PVAAVF-----  
 SbSCPyl-3 -----NF-----STRD-----F-AELYNLGL-----PVAAVF-----  
 FvSCPyl-2 -----NF-----NTRD-----F-AELYNLGS-----PVAAVF-----  
 VvSCPyl-2 -----NF-----NTRD-----F-AELYNLGL-----PVAAVF-----  
 OsSCPyl-2 -----NF-----STRD-----F-AELYNLGL-----PVAAVF-----  
 SbSCPyl-15 -----NF-----NTRD-----F-AELYNLGP-----PVAAVF-----  
 OsSCPyl-7 -----NF-----STRN-----F-AELYNLGS-----PVATVY-----  
 OsSCPyl-8 -----NF-----NTKD-----F-AELYNLGS-----PVAAVF-----  
 VvSCPyl-3 -----NF-----STRQ-----F-AAGNGLGP-----PVALVY-----  
 PpSCPyl-1 -----NF-----NTRT-----F-AVEHGLGF-----PVAATY-----  
 PpSCPyl-4 -----NF-----NTRY-----F-AAQCGLGL-----PVAATY-----  
 PpSCPyl-5 -----NF-----STRN-----F-AAYYGLGL-----PVAATY-----  
 PpSCPyl-6 -----NF-----STRN-----F-ASHYGLGL-----PVAATY-----  
 SmSCPyl-3 -----NF-----STRW-----F-AQEYFLGL-----PVGAVY-----  
 MtSCPyl-7 -----SF-----NTRY-----F-ASQMNLGL-----PVATVY-----  
 AtSCPyl-3 -----NF-----STRM-----F-AGHFDLGL-----PVATVY-----  
 FvSCPyl-4 -----HF-----NTRY-----F-AAQLDLGL-----PVSTVY-----  
 VvSCPyl-4 -----HF-----STRA-----F-ANQLDLGL-----PVATVY-----  
 OsSCPyl-1 -----NF-----NTRA-----F-AAHQGLGL-----PTAVVH-----  
 SbSCPyl-4 -----NF-----NTRA-----F-AAHELGL-----PTAVVY-----  
 OsSCPyl-9 -----RF-----STRA-----F-ADRHDLGL-----PVAALY-----  
 SbSCPyl-16 -----RF-----RNRA-----F-ADRHDLGL-----PVAAMY-----

SmSCPyl-11 -----I-----  
 PpSCPyl-3 -----LSGPGRAQ-----LKSQHNTRVATVAHQ-----  
 MpSCPyl-1 -----LTCS-PPS-----KDRRTGVEDDVHV-----  
 SmSCPyl-15 LEAEFLNPVTDV-----IRKNNKAYPELWV-----  
 SmSCPyl-14 -----FVAQ-LTL-----NFRTRMFQC-----  
 SmSCPyl-16 -----FVAQ-LTL-----NFRTRMFQC-----  
 SmSCPyl-17 -----FVAQ-LTL-----NFRTRMFQC-----  
 SmSCPyl-18 -----FTTSLH-----  
 SmSCPyl-1 -----LVAHGYPA-----GATCTSR-----  
 SmSCPyl-6 -----ELSPWL-----  
 SmSCPyl-2 -----FTTSLA-----  
 SmSCPyl-10 -----FTTSLH-----  
 SmSCPyl-8 -----FTTSLY-----  
 SmSCPyl-9 -----FTTSLH-----  
 SmSCPyl-5 -----FTTSLY-----  
 SmSCPyl-7 -----FTTSLY-----  
 PpSCPyl-2 -----FMVA-----  
 MpSCPyl-2 -----FVCS-RERH-----  
 CsSCPyl-1 -----FEVA-----APGIE-----  
 SmSCPyl-12 -----FTVE-----AGVKVF-----  
 SmSCPyl-13 -----F-----

SmSCPYP1-4 ----FKAQGMEP-----  
 AtSCPYP1-5 ----FNAQ-RET-----APRRRPSY----  
 VvSCPYP1-1 ----FNAQ-RET-----AARRR-----  
 FvSCPYP1-1 ----FNAQ-RET-----AARRR-----  
 MtSCPYP1-8 ----FNAQ-RET-----AARRR-----  
 AtSCPYP1-6 ----FNAQ-RET-----AARKR-----  
 MtSCPYP1-1 ----FNAQ-RET-----AARRR-----  
 AtSCPYP1-1 ----FNCQ-RET-----AARRR-----  
 FvSCPYP1-3 ----FNAQ-RET-----AARRR-----  
 VvSCPYP1-6 ----FNAQ-RET-----AARKR-----  
 MtSCPYP1-5 ----FNAQ-RET-----AARRR-----  
 VvSCPYP1-5 ----FNAQ-RET-----AARRR-----  
 OsSCPYP1-13 ----FNAQ-RET-----AARRR-----  
 OsSCPYP1-15 ----FNAQ-RET-----AARRR-----  
 SbSCPYP1-9 ----FNAQ-RET-----AARRR-----  
 SbSCPYP1-13 ----FNAQ-RET-----AARRR-----  
 SbSCPYP1-11 ----FNAQ-RET-----AARRR-----  
 OsSCPYP1-5 ----FNAQ-RET-----AARRR-----  
 SbSCPYP1-7 ----FNAQ-RET-----AARRR-----  
 OsSCPYP1-4 ----FNAQ-RET-----AARRR-----  
 OsSCPYP1-12 ----FNCQ-REA-----GWGGRKFAPEGP-  
 SbSCPYP1-5 ----FNCQ-REA-----GSGGRRFRPESS-  
 OsSCPYP1-10 ----FNCQ-RPT-----GTGGRRPT----  
 SbSCPYP1-17 ----FNCQ-RQT-----GTGGRRFT----  
 OsSCPYP1-3 ----FNCQ-RQA-----GSGGRRFTGPYTS  
 SbSCPYP1-6 ----FNCQ-RQN-----GSGGRRFTGAYTG  
 SbSCPYP1-10 ----FNCQ-RQT-----GSGGPRFTGPYTS  
 OsSCPYP1-11 ----FNCQ-KES-----GVGGRR-----  
 SbSCPYP1-2 ----FNCQ-KES-----GVGGRR-----  
 MtSCPYP1-2 ----FNCQ-REK-----GCGGRR-----  
 OsSCPYP1-17 ----FNCQ-REN-----GCGGRRYIR---  
 SbSCPYP1-8 ----FNCQ-REN-----GCGGRRYIR---  
 OsSCPYP1-6 ----FNCQ-REN-----GCGGRRYIR---  
 SbSCPYP1-12 ----FNCQ-REN-----GCGGRRYIR---  
 OsSCPYP1-16 ----FNCQ-REN-----GCGGRRYIR---  
 SbSCPYP1-1 ----FNCQ-REN-----GCGGRRYIR---  
 OsSCPYP1-14 ----FNCQ-REG-----GCGGRRYRS---  
 SbSCPYP1-14 ----FNCQ-REG-----GCGGRRYR---  
 MtSCPYP1-4 ----FNCQ-RES-----GSGGRTFR---  
 MtSCPYP1-3 ----FNCQ-REN-----GSGGRRMVI---  
 MtSCPYP1-6 ----FNCQ-REN-----GSGGRRLLI---  
 FvSCPYP1-5 ----FNCQ-RET-----GCGGRRTIM---  
 AtSCPYP1-2 ----FNCQ-REN-----GCGGRRT---  
 AtSCPYP1-4 ----FNCQ-RES-----GCGGRRLL---  
 SbSCPYP1-3 ----FNCQ-RES-----GTGGRRM---  
 FvSCPYP1-2 ----FNCQ-RES-----GSGGRRRSS---  
 VvSCPYP1-2 ----FNCQ-REG-----GSGGRRS---  
 OsSCPYP1-2 ----FNCQ-RES-----GTGGRRM---  
 SbSCPYP1-15 ----FNCQ-REA-----GSGGRRMYS---  
 OsSCPYP1-7 ----FNCQ-REA-----GSGGRRVYP---  
 OsSCPYP1-8 ----FNCQ-REA-----GSGGRRVYP---  
 VvSCPYP1-3 ----FNSQ-KER-----TNRKH-----  
 PpSCPYP1-1 ----FNAK-KEPENELDSEAAATGPPWASPEGLDPLVQHVVVAIPSRGQQCKSID---  
 PpSCPYP1-4 ----LNAQ-KEP-----GSRRR-----  
 PpSCPYP1-5 ----CNSQ-KEP-----ASRRR-----  
 PpSCPYP1-6 ----CNAQ-KEP-----GSRRR-----  
 SmSCPYP1-3 ----YNAQ-KEP-----ASRRRT-----  
 MtSCPYP1-7 ----FNSQ-KEP-----QAKRR-----  
 AtSCPYP1-3 ----FNAQ-KEP-----ASRRR-----  
 FvSCPYP1-4 ----FNAQ-KEP-----ANRRR-----  
 VvSCPYP1-4 ----FNAQ-KEP-----ANRRR-----  
 OsSCPYP1-1 ----FNSQ-REP-----ANRRR-----  
 SbSCPYP1-4 ----FNAQ-KEP-----ANRRR-----  
 OsSCPYP1-9 ----FNAQ-KEP-----ANRRRRY-----  
 SbSCPYP1-16 ----FNAQ-KEP-----ANRRHRHY-----

SmSCPYP1-11 -----  
 PpSCPYP1-3 -----  
 MpSCPYP1-1 AEGHEPLTIDPLYVV  
 SmSCPYP1-15 RMQGIHVSE-----  
 SmSCPYP1-14 -----  
 SmSCPYP1-16 -----  
 SmSCPYP1-17 -----  
 SmSCPYP1-18 -----  
 SmSCPYP1-1 -----  
 SmSCPYP1-6 -----  
 SmSCPYP1-2 -----  
 SmSCPYP1-10 -----  
 SmSCPYP1-8 -----  
 SmSCPYP1-9 -----  
 SmSCPYP1-5 -----  
 SmSCPYP1-7 -----

PpSCPyl-2 -----  
MpSCPyl-2 -----  
CsSCPyl-1 -----  
SmSCPyl-12 -----  
SmSCPyl-13 -----  
SmSCPyl-4 -----  
AtSCPyl-5 -----  
VvSCPyl-1 -----  
FvSCPyl-1 -----  
MtSCPyl-8 -----  
AtSCPyl-6 -----  
MtSCPyl-1 -----  
AtSCPyl-1 -----  
FvSCPyl-3 -----  
VvSCPyl-6 -----  
MtSCPyl-5 -----  
VvSCPyl-5 -----  
OsSCPyl-13 -----  
OsSCPyl-15 -----  
SbSCPyl-9 -----  
SbSCPyl-13 -----  
SbSCPyl-11 -----  
OsSCPyl-5 -----  
SbSCPyl-7 -----  
OsSCPyl-4 -----  
OsSCPyl-12 -----  
SbSCPyl-5 -----  
OsSCPyl-10 -----  
SbSCPyl-17 -----  
OsSCPyl-3 RRRQA-----  
SbSCPyl-6 GRHG-----  
SbSCPyl-10 RRRAG-----  
OsSCPyl-11 -----  
SbSCPyl-2 -----  
MtSCPyl-2 -----  
OsSCPyl-17 -----  
SbSCPyl-8 -----  
OsSCPyl-6 -----  
SbSCPyl-12 -----  
OsSCPyl-16 -----  
SbSCPyl-1 -----  
OsSCPyl-14 -----  
SbSCPyl-14 -----  
MtSCPyl-4 -----  
MtSCPyl-3 -----  
MtSCPyl-6 -----  
FvSCPyl-5 -----  
AtSCPyl-2 -----  
AtSCPyl-4 -----  
SbSCPyl-3 -----  
FvSCPyl-2 -----  
VvSCPyl-2 -----  
OsSCPyl-2 -----  
SbSCPyl-15 -----  
OsSCPyl-7 -----  
OsSCPyl-8 -----  
VvSCPyl-3 -----  
PpSCPyl-1 -----  
PpSCPyl-4 -----  
PpSCPyl-5 -----  
PpSCPyl-6 -----  
SmSCPyl-3 -----  
MtSCPyl-7 -----  
AtSCPyl-3 -----  
FvSCPyl-4 -----  
VvSCPyl-4 -----  
OsSCPyl-1 -----  
SbSCPyl-4 -----  
OsSCPyl-9 -----  
SbSCPyl-16 -----
