# Supplementary material for: Plant protein peptidase inhibitors: an evolutionary overview based on comparative genomics
Source: PubMed Central journal article supplement (PMC4189545; doi:10.1186/1471-2164-15-812), 2014-09-25
Supplement: 12864_2014_6493_MOESM3_ESM.pdf [file 12864_2014_6493_MOESM3_ESM.pdf]

**Additional file 3.** Information about the sequences used in the phylogenetic trees.

**A. I1 Kazal sequences.**

| <b>Protein</b> | <b>Organism</b>                   | <b>Gene model</b>            |
|----------------|-----------------------------------|------------------------------|
| AtKaz-1        | <i>Arabidopsis thaliana</i>       | AT4G01575.1                  |
| AtKaz-2        | <i>Arabidopsis thaliana</i>       | AT3G61980.1                  |
| CsKaz-1        | <i>Cucumis sativus</i>            | Cucsa.174730.1               |
| FvKaz-1        | <i>Fragaria vesca</i>             | mrna12428.1-v1.0-hybrid      |
| FvKaz-2        | <i>Fragaria vesca</i>             | mrna21627.1-v1.0-hybrid      |
| GmKaz-1        | <i>Glycine max</i>                | Glyma14g36800.1              |
| GmKaz-2        | <i>Glycine max</i>                | Glyma02g38630.1              |
| GmKaz-3        | <i>Glycine max</i>                | Glyma04g40413.1              |
| MtKaz-1        | <i>Medicago truncatula</i>        | Medtr3g093240.1              |
| MtKaz-2        | <i>Medicago truncatula</i>        | Medtr5g068760.1              |
| MgKaz-1        | <i>Mimulus guttatus</i>           | mgv1a025397m                 |
| PtKaz-1        | <i>Populus trichocarpa</i>        | Potri.015G001800.1           |
| PtKaz-2        | <i>Populus trichocarpa</i>        | Potri.002G182800.1           |
| PtKaz-3        | <i>Populus trichocarpa</i>        | Potri.014G109000.1           |
| PtKaz-4        | <i>Populus trichocarpa</i>        | Potri.014G108900.1           |
| PtKaz-5        | <i>Populus trichocarpa</i>        | Potri.014G108800.1           |
| PtKaz-6        | <i>Populus trichocarpa</i>        | Potri.014G108700.1           |
| PtKaz-7        | <i>Populus trichocarpa</i>        | Potri.014G108600.1           |
| PpeKaz-1       | <i>Prunus persica</i>             | ppa014626m                   |
| PpeKaz-2       | <i>Prunus persica</i>             | ppa013184m                   |
| RcKaz-1        | <i>Ricinus communis</i>           | 30154.m001128_RICCO          |
| RcKaz-2        | <i>Ricinus communis</i>           | 30076.m004498_RICCO          |
| RcKaz-3        | <i>Ricinus communis</i>           | 30076.m004499_RICCO          |
| RcKaz-4        | <i>Ricinus communis</i>           | 30076.m004497_RICCO          |
| RcKaz-5        | <i>Ricinus communis</i>           | 30076.m004496_RICCO          |
| TcKaz-1        | <i>Theobroma cacao</i>            | Thecc1EG005000t1             |
| TcKaz-2        | <i>Theobroma cacao</i>            | Thecc1EG015543t1             |
| VvKaz-1        | <i>Vitis vinifera</i>             | GSVIVP00037147001_VITVI      |
| BdKaz-1        | <i>Brachypodium distachyon</i>    | Bradi2g52990.1_BRADI         |
| OsKaz-1        | <i>Oryza sativa</i>               | LOC_Os01g59610.1             |
| SbKaz-1        | <i>Sorghum bicolor</i>            | Sb03g037650.1                |
| ZmKaz-1        | <i>Zea mays</i>                   | GRMZM2G144936_T01            |
| ZmKaz-2        | <i>Zea mays</i>                   | GRMZM2G028266_T01            |
| ZmKaz-3        | <i>Zea mays</i>                   | GRMZM2G324806_T01            |
| SmKaz-1        | <i>Selaginella moellendorffii</i> | 414607                       |
| PpKaz-1        | <i>Physcomitrella patens</i>      | Pp1s80_198V6.2               |
| PpKaz-2        | <i>Physcomitrella patens</i>      | Pp1s70_36V6.1                |
| PpKaz-3        | <i>Physcomitrella patens</i>      | Pp1s227_63V6.1               |
| PpKaz-4        | <i>Physcomitrella patens</i>      | Pp1s288_41V6.1               |
| CrKaz-3        | <i>Chlamydomonas reinhardtii</i>  | Cre07.g329500.t2.1a          |
| CrKaz-3        | <i>Chlamydomonas reinhardtii</i>  | Cre07.g329500.t2.1b          |
| CrKaz-3        | <i>Chlamydomonas reinhardtii</i>  | Cre06.g267750.t1.2a          |
| CsuKaz-1       | <i>Coccomyxa subellipsoidea</i>   | Ext_fgenes1_pg.C_80144 47526 |

|         |                       |                  |
|---------|-----------------------|------------------|
| VcKaz-2 | <i>Volvox carteri</i> | Vocar20000301m.a |
|---------|-----------------------|------------------|

### B. I3 Kunitz-P sequences.

| <b>Protein</b> | <b>Organism</b>             | <b>Gene model</b> |
|----------------|-----------------------------|-------------------|
| MtKun-1a       | <i>Medicago truncatula</i>  | Medtr3g106580.1a  |
| MtKun-1b       | <i>Medicago truncatula</i>  | Medtr3g106580.1b  |
| MtKun-2        | <i>Medicago truncatula</i>  | Medtr3g014820.1   |
| MtKun-3        | <i>Medicago truncatula</i>  | Medtr3g014870.1   |
| MtKun-4        | <i>Medicago truncatula</i>  | Medtr3g106620.1   |
| MtKun-5        | <i>Medicago truncatula</i>  | Medtr7g037410.1   |
| MtKun-6        | <i>Medicago truncatula</i>  | Medtr6g078290.1   |
| MtKun-7        | <i>Medicago truncatula</i>  | Medtr6g059790.1   |
| MtKun-8        | <i>Medicago truncatula</i>  | Medtr6g078250.1   |
| MtKun-9        | <i>Medicago truncatula</i>  | Medtr6g044810.1   |
| MtKun-10       | <i>Medicago truncatula</i>  | Medtr6g078260.1   |
| MtKun-11       | <i>Medicago truncatula</i>  | Medtr6g059760.1b  |
| MtKun-12       | <i>Medicago truncatula</i>  | Medtr6g078120.1   |
| MtKun-13       | <i>Medicago truncatula</i>  | Medtr6g078070.1   |
| MtKun-14       | <i>Medicago truncatula</i>  | Medtr6g044780.1   |
| MtKun-15       | <i>Medicago truncatula</i>  | Medtr6g065460.1   |
| MtKun-16       | <i>Medicago truncatula</i>  | Medtr6g059650.1   |
| MtKun-17       | <i>Medicago truncatula</i>  | Medtr6g009650.1   |
| MtKun-18       | <i>Medicago truncatula</i>  | Medtr6g078280.1   |
| MtKun-19       | <i>Medicago truncatula</i>  | Medtr6g059810.1   |
| MtKun-20       | <i>Medicago truncatula</i>  | Medtr6g059530.1   |
| MtKun-21       | <i>Medicago truncatula</i>  | Medtr6g078140.1   |
| MtKun-22       | <i>Medicago truncatula</i>  | Medtr6g059680.1   |
| MtKun-23       | <i>Medicago truncatula</i>  | Medtr6g078100.1   |
| MtKun-24       | <i>Medicago truncatula</i>  | Medtr6g059410.1   |
| MtKun-25       | <i>Medicago truncatula</i>  | Medtr6g059730.1   |
| MtKun-26       | <i>Medicago truncatula</i>  | Medtr8g059790.1   |
| MtKun-27       | <i>Medicago truncatula</i>  | AC235677_10.1     |
| MtKun-28       | <i>Medicago truncatula</i>  | AC235677_27.1     |
| AtKun-1        | <i>Arabidopsis thaliana</i> | AT1G73330.1       |
| AtKun-2        | <i>Arabidopsis thaliana</i> | AT1G72290.1       |
| AtKun-3        | <i>Arabidopsis thaliana</i> | AT1G73325.1       |
| AtKun-4        | <i>Arabidopsis thaliana</i> | AT1G73260.1       |
| AtKun-5        | <i>Arabidopsis thaliana</i> | AT1G17860.1       |
| FvKun-1        | <i>Fragaria vesca</i>       | gene08979-v1.0    |
| FvKun-2        | <i>Fragaria vesca</i>       | gene08978-v1.0    |
| FvKun-3        | <i>Fragaria vesca</i>       | gene27334-v1.0    |
| FvKun-4        | <i>Fragaria vesca</i>       | gene27360-v1.0    |
| FvKun-5        | <i>Fragaria vesca</i>       | gene27359-v1.0    |
| VvKun-1        | <i>Vitis vinifera</i>       | GSVIVT01012920001 |
| VvKun-2        | <i>Vitis vinifera</i>       | GSVIVT01012922001 |

|         |                                |                   |
|---------|--------------------------------|-------------------|
| VvKun-3 | <i>Vitis vinifera</i>          | GSVIVT01012932001 |
| VvKun-4 | <i>Vitis vinifera</i>          | GSVIVT01012936001 |
| BdKun-1 | <i>Brachypodium distachyon</i> | Bradi4g01470.1    |
| BdKun-2 | <i>Brachypodium distachyon</i> | Bradi5g16290.1    |
| OsKun-1 | <i>Oryza sativa</i>            | LOC_Os04g44470.1  |
| SbKun-1 | <i>Sorghum bicolor</i>         | Sb06g023160.1     |
| ZmKun-1 | <i>Zea mays</i>                | GRMZM2G474575_T01 |

### C. I4 Serpin sequences.

| <b>Protein</b> | <b>Organism</b>             | <b>Gene model</b>       |
|----------------|-----------------------------|-------------------------|
| MtSRP-1        | <i>Medicago truncatula</i>  | Medtr3g100520.1         |
| MtSRP-2        | <i>Medicago truncatula</i>  | Medtr3g101030.1         |
| MtSRP-3        | <i>Medicago truncatula</i>  | Medtr3g101150.1         |
| MtSRP-4        | <i>Medicago truncatula</i>  | Medtr3g101180.1         |
| MtSRP-5        | <i>Medicago truncatula</i>  | Medtr3g101050.1         |
| MtSRP-6        | <i>Medicago truncatula</i>  | Medtr7g050750.1         |
| MtSRP-7        | <i>Medicago truncatula</i>  | Medtr3g101010.1         |
| MtSRP-8        | <i>Medicago truncatula</i>  | Medtr3g114310.1         |
| MtSRP-9        | <i>Medicago truncatula</i>  | Medtr3g101130.1         |
| MtSRP-10       | <i>Medicago truncatula</i>  | Medtr3g015760.1         |
| MtSRP-11       | <i>Medicago truncatula</i>  | Medtr3g101200.1         |
| MtSRP-12       | <i>Medicago truncatula</i>  | Medtr3g015620.1         |
| MtSRP-13       | <i>Medicago truncatula</i>  | Medtr3g111160.1         |
| MtSRP-14       | <i>Medicago truncatula</i>  | Medtr3g018740.1         |
| MtSRP-15       | <i>Medicago truncatula</i>  | Medtr3g100990.1         |
| MtSRP-16       | <i>Medicago truncatula</i>  | Medtr7g050810.1         |
| FvSRP-1        | <i>Fragaria vesca</i>       | mrna16217.1-v1.0-hybrid |
| FvSRP-2        | <i>Fragaria vesca</i>       | mrna31740.1-v1.0-hybrid |
| FvSRP-3        | <i>Fragaria vesca</i>       | mrna15046.1-v1.0-hybrid |
| FvSRP-4        | <i>Fragaria vesca</i>       | mrna01845.1-v1.0-hybrid |
| FvSRP-5        | <i>Fragaria vesca</i>       | mrna32429.1-v1.0-hybrid |
| FvSRP-6        | <i>Fragaria vesca</i>       | mrna10757.1-v1.0-hybrid |
| FvSRP-7        | <i>Fragaria vesca</i>       | mrna03508.1-v1.0-hybrid |
| FvSRP-8        | <i>Fragaria vesca</i>       | mrna30734.1-v1.0-hybrid |
| FvSRP-9        | <i>Fragaria vesca</i>       | mrna28549.1-v1.0-hybrid |
| FvSRP-10       | <i>Fragaria vesca</i>       | mrna29691.1-v1.0-hybrid |
| FvSRP-11       | <i>Fragaria vesca</i>       | mrna07851.1-v1.0-hybrid |
| FvSRP-12       | <i>Fragaria vesca</i>       | mrna07850.1-v1.0-hybrid |
| FvSRP-13       | <i>Fragaria vesca</i>       | mrna30732.1-v1.0-hybrid |
| FvSRP-14       | <i>Fragaria vesca</i>       | mrna28546.1-v1.0-hybrid |
| AtSRP-1        | <i>Arabidopsis thaliana</i> | AT2G14540.1             |
| AtSRP-2        | <i>Arabidopsis thaliana</i> | AT2G26390.1             |
| AtSRP-3        | <i>Arabidopsis thaliana</i> | AT2G25240.1             |
| AtSRP-4        | <i>Arabidopsis thaliana</i> | AT2G35580.1             |
| AtSRP-5        | <i>Arabidopsis thaliana</i> | AT1G47710.1             |
| AtSRP-6        | <i>Arabidopsis thaliana</i> | AT1G62170.2             |
| AtSRP-7        | <i>Arabidopsis thaliana</i> | AT1G64030.1             |

|          |                                   |                    |
|----------|-----------------------------------|--------------------|
| AtSRP-8  | <i>Arabidopsis thaliana</i>       | AT3G45220.1        |
| SbSRP-1  | <i>Sorghum bicolor</i>            | Sb01g006070.1      |
| SbSRP-2  | <i>Sorghum bicolor</i>            | Sb01g014730.1      |
| SbSRP-3  | <i>Sorghum bicolor</i>            | Sb01g014740.1      |
| SbSRP-4  | <i>Sorghum bicolor</i>            | Sb02g004040.1      |
| SbSRP-5  | <i>Sorghum bicolor</i>            | Sb03g010560.1      |
| SbSRP-6  | <i>Sorghum bicolor</i>            | Sb03g010570.1      |
| SbSRP-7  | <i>Sorghum bicolor</i>            | Sb03g035570.1      |
| SbSRP-8  | <i>Sorghum bicolor</i>            | Sb04g001380.1      |
| SbSRP-9  | <i>Sorghum bicolor</i>            | Sb05g007550.1      |
| SbSRP-10 | <i>Sorghum bicolor</i>            | Sb05g008400.1      |
| SbSRP-11 | <i>Sorghum bicolor</i>            | Sb05g008490.1      |
| SbSRP-12 | <i>Sorghum bicolor</i>            | Sb05g022570.1      |
| SbSRP-13 | <i>Sorghum bicolor</i>            | Sb06g023640.1      |
| SbSRP-14 | <i>Sorghum bicolor</i>            | Sb06g023660.1      |
| SbSRP-15 | <i>Sorghum bicolor</i>            | Sb07g025180.1      |
| SbSRP-16 | <i>Sorghum bicolor</i>            | Sb09g000460.1      |
| OsSRP-1  | <i>Oryza sativa</i>               | Os04g45120.1       |
| OsSRP-2  | <i>Oryza sativa</i>               | Os04g45110.1       |
| OsSRP-3  | <i>Oryza sativa</i>               | Os01g56010.1       |
| OsSRP-4  | <i>Oryza sativa</i>               | Os01g16200.1       |
| OsSRP-5  | <i>Oryza sativa</i>               | Os03g41438.1       |
| OsSRP-6a | <i>Oryza sativa</i>               | Os03g41419.1 a     |
| OsSRP-6b | <i>Oryza sativa</i>               | Os03g41419.1 b     |
| OsSRP-7  | <i>Oryza sativa</i>               | Os05g43590.1       |
| OsSRP-8  | <i>Oryza sativa</i>               | Os11g12410.1       |
| OsSRP-9  | <i>Oryza sativa</i>               | Os11g13530.1       |
| OsSRP-10 | <i>Oryza sativa</i>               | Os11g12460.1       |
| OsSRP-11 | <i>Oryza sativa</i>               | Os11g13540.1       |
| OsSRP-12 | <i>Oryza sativa</i>               | Os11g12420.1       |
| OsSRP-13 | <i>Oryza sativa</i>               | Os11g11720.1       |
| OsSRP-14 | <i>Oryza sativa</i>               | Os11g11500.1       |
| OsSRP-15 | <i>Oryza sativa</i>               | Os11g11760.1       |
| SmSRP-1  | <i>Selaginella moellendorffii</i> | 173749             |
| PpSRP-1  | <i>Physcomitrella patens</i>      | Pp019G069200.1     |
| PpSRP-2  | <i>Physcomitrella patens</i>      | Pp011G040300.1     |
| PpSRP-3  | <i>Physcomitrella patens</i>      | Pp001G054300.1     |
| PpSRP-4  | <i>Physcomitrella patens</i>      | Pp002G113700.1     |
| CrSRP-1  | <i>Chlamydomonas reinhardtii</i>  | Cre16.g679550.t1.1 |
| VcSRP-1  | <i>Volvox carteri</i>             | Vocar20000111m     |

#### D. I6 Cereal sequences.

| Protein  | Organism                | Gene model            |
|----------|-------------------------|-----------------------|
| MgATI-1  | <i>Mimulus guttatus</i> | gmgv1a015473m         |
| RcATI-1a | <i>Ricinus communis</i> | t00004428166.m001081a |
| RcATI-1b | <i>Ricinus communis</i> | t00004428166.m001081b |
| RcATI-2a | <i>Ricinus communis</i> | t00004528166.m001082a |

|          |                                |                       |
|----------|--------------------------------|-----------------------|
| RcATI-2b | <i>Ricinus communis</i>        | t00004528166.m001082b |
| RcATI-3  | <i>Ricinus communis</i>        | t00004628166.m001083  |
| RcATI-4  | <i>Ricinus communis</i>        | t00002230156.m001719  |
| RcATI-5  | <i>Ricinus communis</i>        | t00003628166.m001073  |
| RcATI-6a | <i>Ricinus communis</i>        | t00004228166.m001079a |
| RcATI-6b | <i>Ricinus communis</i>        | t00004228166.m001079b |
| VvATI-1  | <i>Vitis vinifera</i>          | GSVIVT01001973001     |
| BdATI-1  | <i>Brachypodium distachyon</i> | Bradi1g53970.1        |
| BdATI-2  | <i>Brachypodium distachyon</i> | Bradi1g54000.1        |
| BdATI-3  | <i>Brachypodium distachyon</i> | Bradi1g53990.1        |
| OsATI-1  | <i>Oryza sativa</i>            | LOC_Os07g11380.1      |
| OsATI-2  | <i>Oryza sativa</i>            | LOC_Os07g12080.1      |
| OsATI-3  | <i>Oryza sativa</i>            | LOC_Os07g11650.1      |
| OsATI-4  | <i>Oryza sativa</i>            | LOC_Os07g11630.1      |
| OsATI-5  | <i>Oryza sativa</i>            | LOC_Os07g11310.1      |
| OsATI-6  | <i>Oryza sativa</i>            | LOC_Os07g11330.1      |
| OsATI-7  | <i>Oryza sativa</i>            | LOC_Os07g11510.1      |
| OsATI-8  | <i>Oryza sativa</i>            | LOC_Os07g11410.1      |
| OsATI-9  | <i>Oryza sativa</i>            | LOC_Os05g41970.1      |
| OsATI-10 | <i>Oryza sativa</i>            | Os07g11320.1_ORYSA    |
| OsATI-11 | <i>Oryza sativa</i>            | Os07g11360.1_ORYSA    |
| SbATI-1  | <i>Sorghum bicolor</i>         | Sb02g002495.1         |
| SbATI-2  | <i>Sorghum bicolor</i>         | Sb02g002500.1         |
| SbATI-3  | <i>Sorghum bicolor</i>         | Sb02g006470.1         |
| SbATI-4  | <i>Sorghum bicolor</i>         | Sb02g006480.1         |
| SbATI-5  | <i>Sorghum bicolor</i>         | Sb02g006550.1         |
| SbATI-6  | <i>Sorghum bicolor</i>         | Sb02g006560.1         |
| SbATI-7  | <i>Sorghum bicolor</i>         | Sb02g006570.1         |
| SbATI-8  | <i>Sorghum bicolor</i>         | Sb09g024570.1         |
| ZmATI-1  | <i>Zea mays</i>                | GRMZM2G404688_T01     |
| ZmATI-2  | <i>Zea mays</i>                | GRMZM2G304548_T01     |

#### E. I12 Bowman-Birk sequences.

| <b>Protein</b> | <b>Organism</b>            | <b>Gene model</b> |
|----------------|----------------------------|-------------------|
| GmBBI-1        | <i>Glycine max</i>         | Glyma14g26400.1   |
| GmBBI-2        | <i>Glycine max</i>         | Glyma14g26410.1   |
| GmBBI-3        | <i>Glycine max</i>         | Glyma09g28720.1   |
| GmBBI-4        | <i>Glycine max</i>         | Glyma09g28730.1   |
| GmBBI-5        | <i>Glycine max</i>         | Glyma09g28713.1   |
| GmBBI-6        | <i>Glycine max</i>         | Glyma09g39640.1   |
| GmBBI-7        | <i>Glycine max</i>         | Glyma09g39630.1   |
| GmBBI-8        | <i>Glycine max</i>         | Glyma09g39621.1   |
| GmBBI-9        | <i>Glycine max</i>         | Glyma16g33400.1   |
| GmBBI-10       | <i>Glycine max</i>         | Glyma18g46550.1   |
| GmBBI-11       | <i>Glycine max</i>         | Glyma18g46560.1   |
| GmBBI-12       | <i>Glycine max</i>         | Glyma18g46580.1   |
| MtBBI-1        | <i>Medicago truncatula</i> | Medtr7g077320.1   |

|           |                                |                  |
|-----------|--------------------------------|------------------|
| MtBBI-2   | <i>Medicago truncatula</i>     | Medtr7g077300.1  |
| MtBBI-3   | <i>Medicago truncatula</i>     | Medtr7g077340.1  |
| MtBBI-4   | <i>Medicago truncatula</i>     | Medtr7g077260.1  |
| MtBBI-5   | <i>Medicago truncatula</i>     | Medtr7g077190.1  |
| MtBBI-6   | <i>Medicago truncatula</i>     | Medtr7g077310.1  |
| MtBBI-7   | <i>Medicago truncatula</i>     | Medtr7g077160.1  |
| MtBBI-8   | <i>Medicago truncatula</i>     | Medtr7g077220.1  |
| MtBBI-9   | <i>Medicago truncatula</i>     | Medtr7g077230.1  |
| MtBBI-10  | <i>Medicago truncatula</i>     | Medtr7g077180.1  |
| MtBBI-11a | <i>Medicago truncatula</i>     | Medtr7g077210.1  |
| MtBBI-11b | <i>Medicago truncatula</i>     | Medtr7g077210.1  |
| MtBBI-12  | <i>Medicago truncatula</i>     | Medtr7g077350.1  |
| BdBBI-1   | <i>Brachypodium distachyon</i> | Bradi3g22860.1   |
| BdBBI-2a  | <i>Brachypodium distachyon</i> | Bradi2g01920.1   |
| BdBBI-2b  | <i>Brachypodium distachyon</i> | Bradi2g01920.1   |
| BdBBI-3   | <i>Brachypodium distachyon</i> | Bradi1g50670.2   |
| BdBBI-4a  | <i>Brachypodium distachyon</i> | Bradi2g01930.1   |
| BdBBI-4b  | <i>Brachypodium distachyon</i> | Bradi2g01930.1   |
| BdBBI-5   | <i>Brachypodium distachyon</i> | Bradi1g50670.1   |
| BdBBI-6a  | <i>Brachypodium distachyon</i> | Bradi2g01910.1   |
| BdBBI-6b  | <i>Brachypodium distachyon</i> | Bradi2g01910.1   |
| OsBBI-1a  | <i>Oryza sativa</i>            | LOC_Os01g03380.1 |
| OsBBI-1b  | <i>Oryza sativa</i>            | LOC_Os01g03380.1 |
| OsBBI-2a  | <i>Oryza sativa</i>            | LOC_Os01g03310.1 |
| OsBBI-2b  | <i>Oryza sativa</i>            | LOC_Os01g03310.1 |
| OsBBI-3a  | <i>Oryza sativa</i>            | LOC_Os01g03390.1 |
| OsBBI-3b  | <i>Oryza sativa</i>            | LOC_Os01g03390.1 |
| OsBBI-4a  | <i>Oryza sativa</i>            | LOC_Os01g03680.1 |
| OsBBI-4b  | <i>Oryza sativa</i>            | LOC_Os01g03680.1 |
| OsBBI-5a  | <i>Oryza sativa</i>            | LOC_Os01g03320.1 |
| OsBBI-5b  | <i>Oryza sativa</i>            | LOC_Os01g03320.1 |
| OsBBI-6a  | <i>Oryza sativa</i>            | LOC_Os01g03360.1 |
| OsBBI-6b  | <i>Oryza sativa</i>            | LOC_Os01g03360.1 |
| OsBBI-6c  | <i>Oryza sativa</i>            | LOC_Os01g03360.1 |
| OsBBI-7a  | <i>Oryza sativa</i>            | LOC_Os01g03340.1 |
| OsBBI-7b  | <i>Oryza sativa</i>            | LOC_Os01g03340.1 |
| OsBBI-7c  | <i>Oryza sativa</i>            | LOC_Os01g03340.1 |
| OsBBI-8a  | <i>Oryza sativa</i>            | LOC_Os01g03330.1 |
| OsBBI-8b  | <i>Oryza sativa</i>            | LOC_Os01g03330.1 |
| OsBBI-8c  | <i>Oryza sativa</i>            | LOC_Os01g03330.1 |
| OsBBI-9   | <i>Oryza sativa</i>            | LOC_Os03g60840.1 |
| SbBBI-1   | <i>Sorghum bicolor</i>         | Sb01g003000.1    |
| SbBBI-2   | <i>Sorghum bicolor</i>         | Sb03g039790.1    |
| SbBBI-3   | <i>Sorghum bicolor</i>         | Sb03g039800.1    |
| SbBBI-4   | <i>Sorghum bicolor</i>         | Sb05g026650.1    |
| SbBBI-5   | <i>Sorghum bicolor</i>         | Sb05g026670.1    |
| SbBBI-6   | <i>Sorghum bicolor</i>         | Sb05g026680.1    |
| SbBBI-7   | <i>Sorghum bicolor</i>         | Sb05g026700.1    |

|          |                 |                   |
|----------|-----------------|-------------------|
| ZmBBI-1a | <i>Zea mays</i> | GRMZM2G114552_T01 |
| ZmBBI-1b | <i>Zea mays</i> | GRMZM2G114552_T01 |
| ZmBBI-2a | <i>Zea mays</i> | AC208221.3_FGT002 |
| ZmBBI-2b | <i>Zea mays</i> | AC208221.3_FGT002 |
| ZmBBI-3a | <i>Zea mays</i> | GRMZM2G447785_T02 |
| ZmBBI-3b | <i>Zea mays</i> | GRMZM2G447785_T02 |
| ZmBBI-4  | <i>Zea mays</i> | AC212728.3_FGT001 |

#### F. I13 Pin-I sequences.

| <b>Protein</b> | <b>Organism</b>             | <b>Gene model</b>       |
|----------------|-----------------------------|-------------------------|
| MtPINI-1       | <i>Medicago truncatula</i>  | Medtr3g020800.1         |
| MtPINI-2       | <i>Medicago truncatula</i>  | Medtr3g020930.1         |
| MtPINI-3       | <i>Medicago truncatula</i>  | Medtr3g020970.1         |
| MtPINI-4       | <i>Medicago truncatula</i>  | Medtr3g020880.1         |
| MtPINI-5       | <i>Medicago truncatula</i>  | Medtr5g090250.1         |
| MtPINI-6       | <i>Medicago truncatula</i>  | Medtr5g045470.1         |
| MtPINI-7       | <i>Medicago truncatula</i>  | Medtr1g075340.1         |
| MtPINI-8       | <i>Medicago truncatula</i>  | Medtr1g075380.1         |
| MtPINI-9       | <i>Medicago truncatula</i>  | Medtr1g075410.1         |
| FvPINI-1       | <i>Fragaria vesca</i>       | mrna32568.1-v1.0-hybrid |
| FvPINI-2       | <i>Fragaria vesca</i>       | mrna32558.1-v1.0-hybrid |
| FvPINI-3       | <i>Fragaria vesca</i>       | mrna32561.1-v1.0-hybrid |
| FvPINI-4       | <i>Fragaria vesca</i>       | mrna32563.1-v1.0-hybrid |
| FvPINI-5       | <i>Fragaria vesca</i>       | mrna32562.1-v1.0-hybrid |
| AtPINI-1       | <i>Arabidopsis thaliana</i> | AT3G46860.1             |
| AtPINI-2       | <i>Arabidopsis thaliana</i> | AT3G50020.1             |
| AtPINI-3       | <i>Arabidopsis thaliana</i> | AT5G43580.1             |
| AtPINI-4       | <i>Arabidopsis thaliana</i> | AT5G43570.1             |
| AtPINI-5       | <i>Arabidopsis thaliana</i> | AT2G38870.1             |
| AtPINI-6       | <i>Arabidopsis thaliana</i> | AT2G38900.2             |
| VvPINI-1       | <i>Vitis vinifera</i>       | GSVIVT01018137001       |
| VvPINI-2       | <i>Vitis vinifera</i>       | GSVIVT01018139001       |
| VvPINI-3       | <i>Vitis vinifera</i>       | GSVIVT01018141001       |
| VvPINI-4       | <i>Vitis vinifera</i>       | GSVIVT01018142001       |
| VvPINI-5       | <i>Vitis vinifera</i>       | GSVIVT01032743001       |
| VvPINI-6       | <i>Vitis vinifera</i>       | GSVIVT01034125001       |
| SbPINI-1       | <i>Sorghum bicolor</i>      | Sb04g001965.1           |
| SbPINI-2       | <i>Sorghum bicolor</i>      | Sb04g001970.1           |
| SbPINI-3       | <i>Sorghum bicolor</i>      | Sb04g002002.1           |
| SbPINI-4       | <i>Sorghum bicolor</i>      | Sb04g002030.1           |
| SbPINI-5       | <i>Sorghum bicolor</i>      | Sb04g002045.1           |
| SbPINI-6       | <i>Sorghum bicolor</i>      | Sb08g005570.1           |
| SbPINI-7       | <i>Sorghum bicolor</i>      | Sb09g001010.1           |
| SbPINI-8       | <i>Sorghum bicolor</i>      | Sb09g001020.1           |

|           |                                   |                 |
|-----------|-----------------------------------|-----------------|
| SbPINI-9  | <i>Sorghum bicolor</i>            | Sb09g001030.1   |
| SbPINI-10 | <i>Sorghum bicolor</i>            | Sb09g001040.1   |
| SbPINI-11 | <i>Sorghum bicolor</i>            | Sb09g001050.1   |
| SbPINI-12 | <i>Sorghum bicolor</i>            | Sb09g001060.1   |
| SbPINI-13 | <i>Sorghum bicolor</i>            | Sb09g001070.1   |
| SbPINI-14 | <i>Sorghum bicolor</i>            | Sb09g001080.1   |
| SbPINI-15 | <i>Sorghum bicolor</i>            | Sb09g001083.1   |
| SbPINI-16 | <i>Sorghum bicolor</i>            | Sb09g001086.1   |
| SbPINI-17 | <i>Sorghum bicolor</i>            | Sb09g017500.1   |
| SbPINI-18 | <i>Sorghum bicolor</i>            | Sb04g001980.1   |
| SbPINI-19 | <i>Sorghum bicolor</i>            | Sb04g001990.1   |
| SbPINI-20 | <i>Sorghum bicolor</i>            | Sb1445s002010.1 |
| SbPINI-21 | <i>Sorghum bicolor</i>            | Sb04g002020.1   |
| SbPINI-22 | <i>Sorghum bicolor</i>            | Sb04g002040.1   |
| SbPINI-23 | <i>Sorghum bicolor</i>            | Sb04g002050.1   |
| OsPINI-1  | <i>Oryza sativa</i>               | Os02g03170.1    |
| OsPINI-2  | <i>Oryza sativa</i>               | Os06g21540.1    |
| OsPINI-3  | <i>Oryza sativa</i>               | Os08g34258.1    |
| OsPINI-4  | <i>Oryza sativa</i>               | Os08g34249.1    |
| OsPINI-5  | <i>Oryza sativa</i>               | Os01g42860.1    |
| OsPINI-6  | <i>Oryza sativa</i>               | Os02g03140.1    |
| OsPINI-7  | <i>Oryza sativa</i>               | Os02g03190.1    |
| OsPINI-8  | <i>Oryza sativa</i>               | Os02g03150.1    |
| OsPINI-9  | <i>Oryza sativa</i>               | Os12g36210.1    |
| OsPINI-10 | <i>Oryza sativa</i>               | Os12g25090.2    |
| OsPINI-11 | <i>Oryza sativa</i>               | Os12g36240.1    |
| OsPINI-12 | <i>Oryza sativa</i>               | Os05g01920.1    |
| OsPINI-13 | <i>Oryza sativa</i>               | Os11g17790.1    |
| OsPINI-14 | <i>Oryza sativa</i>               | Os02g03180.1    |
| OsPINI-15 | <i>Oryza sativa</i>               | Os12g36220.1    |
| SmPINI-1  | <i>Selaginella moellendorffii</i> | 84301           |
| PpPINI-1  | <i>Physcomitrella patens</i>      | Pp017G009600.1  |
| PpPINI-2  | <i>Physcomitrella patens</i>      | Pp023G080500.1  |
| CsuPINI-1 | <i>Coccomyxa subellipsoidea</i>   | 60469           |

### G. I20 Pin-II sequences.

| <b>Protein</b> | <b>Organism</b>             | <b>Gene model</b>       |
|----------------|-----------------------------|-------------------------|
| RcPinII-1      | <i>Ricinus communis</i>     | 30074.m001422           |
| PtPinII-1      | <i>Populus trichocarpa</i>  | Potri.019G080600.1      |
| PpPinII-1      | <i>Prunus persica</i>       | ppa017948m              |
| PpPinII-2      | <i>Prunus persica</i>       | ppb022308m              |
| FvPinII-1      | <i>Fragaria vesca</i>       | mrna25667.1-v1.0-hybrid |
| AtPinII-1      | <i>Arabidopsis thaliana</i> | AT1G72060.1             |



|            |                                   |                      |
|------------|-----------------------------------|----------------------|
| VvPinII-1  | <i>Vitis vinifera</i>             | GSVIVT01023245001    |
| MgPinII-1  | <i>Mimulus guttatus</i>           | mgv1a025135m         |
| SbPinII-1  | <i>Sorghum bicolor</i>            | Sb01g008960.1        |
| SbPinII-2  | <i>Sorghum bicolor</i>            | Sb03g009370.1        |
| ZmPinII-1  | <i>Zea mays</i>                   | GRMZM2G108847_T01    |
| OsPinII-1  | <i>Oryza sativa</i>               | Os03g52390.1         |
| BdPinII-1  | <i>Brachypodium distachyon</i>    | Bradi2g08720.1_BRADI |
| SmPinII-4a | <i>Selaginella moellendorffii</i> | 444521               |
| SmPinII-4b | <i>Selaginella moellendorffii</i> | 444521               |
| SmPinII-1a | <i>Selaginella moellendorffii</i> | 438273               |
| SmPinII-1b | <i>Selaginella moellendorffii</i> | 438273               |
| SmPinII-2a | <i>Selaginella moellendorffii</i> | 438274               |
| SmPinII-2b | <i>Selaginella moellendorffii</i> | 438274               |
| SmPinII-3a | <i>Selaginella moellendorffii</i> | 438284               |
| SmPinII-3b | <i>Selaginella moellendorffii</i> | 438284               |

#### H. I25 Cystatin sequences.

| <b>Protein</b> | <b>Organism</b>                  | <b>Gene model</b>       |
|----------------|----------------------------------|-------------------------|
| AtCPI-2        | <i>Arabidopsis thaliana</i>      | AT2G31980.1             |
| AtCPI-3        | <i>Arabidopsis thaliana</i>      | AT2G40880.1             |
| AtCPI-4        | <i>Arabidopsis thaliana</i>      | AT4G16500.1             |
| AtCPI-6        | <i>Arabidopsis thaliana</i>      | AT3G12490.2             |
| AtCPI-5        | <i>Arabidopsis thaliana</i>      | AT5G47550.1             |
| AtCPI-1        | <i>Arabidopsis thaliana</i>      | AT5G12140.1             |
| AtCPI-7        | <i>Arabidopsis thaliana</i>      | AT5G05110.1             |
| CrCPI-1        | <i>Chlamydomonas reinhardtii</i> | Cre04.g225650.t1.2      |
| VcCPI-1        | <i>Volvox carteri</i>            | Vocar20011820m          |
| FvCPI-1        | <i>Fragaria vesca</i>            | mrna21484.1-v1.0-hybrid |
| FvCPI-2        | <i>Fragaria vesca</i>            | mrna21476.1-v1.0-hybrid |
| FvCPI-3        | <i>Fragaria vesca</i>            | mrna06633.1-v1.0-hybrid |
| FvCPI-4        | <i>Fragaria vesca</i>            | mrna25711.1-v1.0-hybrid |
| FvCPI-5        | <i>Fragaria vesca</i>            | mrna34164.1-v1.0-hybrid |
| FvCPI-6        | <i>Fragaria vesca</i>            | mrna19785.1-v1.0-hybrid |
| FvCPI-7        | <i>Fragaria vesca</i>            | mrna13968.1-v1.0-hybrid |
| FvCPI-8        | <i>Fragaria vesca</i>            | mrna29824.1-v1.0-hybrid |
| FvCPI-9        | <i>Fragaria vesca</i>            | mrna16463.1-v1.0-hybrid |
| FvCPI-10       | <i>Fragaria vesca</i>            | mrna25708.1-v1.0-hybrid |
| FvCPI-11       | <i>Fragaria vesca</i>            | mrna20093.1-v1.0-hybrid |
| FvCPI-12       | <i>Fragaria vesca</i>            | mrna29817.1-v1.0-hybrid |
| OsCPI-10       | <i>Oryza sativa</i>              | Os04g28250.1            |
| OsCPI-1        | <i>Oryza sativa</i>              | Os01g58890.1            |
| OsCPI-12       | <i>Oryza sativa</i>              | Os01g16430.1            |
| OsCPI-5        | <i>Oryza sativa</i>              | Os01g68670.1            |

|          |                              |                 |
|----------|------------------------------|-----------------|
| OsCPI-4  | <i>Oryza sativa</i>          | Os01g68660.1    |
| OsCPI-6  | <i>Oryza sativa</i>          | Os03g11180.1    |
| OsCPI-7  | <i>Oryza sativa</i>          | Os03g11170.1    |
| OsCPI-9  | <i>Oryza sativa</i>          | Os03g11160.1    |
| OsCPI-13 | <i>Oryza sativa</i>          | Os03g07620.1    |
| OsCPI-8  | <i>Oryza sativa</i>          | Os03g31510.1    |
| OsCPI-11 | <i>Oryza sativa</i>          | Os09g08100.1    |
| OsCPI-2  | <i>Oryza sativa</i>          | Os05g41460.1    |
| OsCPI-14 | <i>Oryza sativa</i>          | Os03g07610.1    |
| OsCPI-15 | <i>Oryza sativa</i>          | Os03g07660.1    |
| OsCPI-16 | <i>Oryza sativa</i>          | Os03g07650.1    |
| OsCPI-17 | <i>Oryza sativa</i>          | Os03g07700.1    |
| OsCPI-18 | <i>Oryza sativa</i>          | Os02g17770.1    |
| OsCPI-3  | <i>Oryza sativa</i>          | Os05g33880.2    |
| PpCPI-1  | <i>Physcomitrella patens</i> | Pp1s66_209V6.2  |
| PpCPI-2  | <i>Physcomitrella patens</i> | Pp1s212_8V6.1   |
| PpCPI-4  | <i>Physcomitrella patens</i> | Pp1s238_59V6.1  |
| PpCPI-3  | <i>Physcomitrella patens</i> | Pp1s238_60V6.1  |
| PpCPI-5  | <i>Physcomitrella patens</i> | Pp1s142_12V6.1  |
| SbCPI-1  | <i>Sorghum bicolor</i>       | Sb01g031440.1   |
| SbCPI-2  | <i>Sorghum bicolor</i>       | Sb01g031450.1   |
| SbCPI-3  | <i>Sorghum bicolor</i>       | Sb01g031460.1   |
| SbCPI-4  | <i>Sorghum bicolor</i>       | Sb01g031470.1   |
| SbCPI-5  | <i>Sorghum bicolor</i>       | Sb01g043320.1   |
| SbCPI-6  | <i>Sorghum bicolor</i>       | Sb01g045590.1   |
| SbCPI-7  | <i>Sorghum bicolor</i>       | Sb01g045610.1   |
| SbCPI-8  | <i>Sorghum bicolor</i>       | Sb01g045630.1   |
| SbCPI-9  | <i>Sorghum bicolor</i>       | Sb03g010730.1   |
| SbCPI-10 | <i>Sorghum bicolor</i>       | Sb03g037370.1   |
| SbCPI-11 | <i>Sorghum bicolor</i>       | Sb03g043680.1   |
| SbCPI-12 | <i>Sorghum bicolor</i>       | Sb04g026140.1   |
| SbCPI-13 | <i>Sorghum bicolor</i>       | Sb09g020170.1   |
| SbCPI-14 | <i>Sorghum bicolor</i>       | Sb09g024230.1   |
| SbCPI-15 | <i>Sorghum bicolor</i>       | Sb09g024240.1   |
| SbCPI-16 | <i>Sorghum bicolor</i>       | Sb1560s002010.1 |
| SbCPI-17 | <i>Sorghum bicolor</i>       | Sb01g023010.1   |
| SbCPI-18 | <i>Sorghum bicolor</i>       | Sb01g045600.1   |
| SbCPI-19 | <i>Sorghum bicolor</i>       | Sb01g015950.1   |
| SbCPI-20 | <i>Sorghum bicolor</i>       | Sb09g024410.1   |
| MtCPI-1  | <i>Medicago truncatula</i>   | Medtr3g043750.1 |
| MtCPI-2  | <i>Medicago truncatula</i>   | Medtr3g084780.1 |
| MtCPI-3  | <i>Medicago truncatula</i>   | Medtr2g076740.1 |
| MtCPI-4  | <i>Medicago truncatula</i>   | Medtr2g028060.1 |
| MtCPI-5  | <i>Medicago truncatula</i>   | Medtr2g103740.1 |
| MtCPI-6  | <i>Medicago truncatula</i>   | Medtr2g076800.1 |

|          |                                   |                   |
|----------|-----------------------------------|-------------------|
| MtCPI-7  | <i>Medicago truncatula</i>        | Medtr2g028100.1   |
| MtCPI-8  | <i>Medicago truncatula</i>        | Medtr2g028520.1   |
| MtCPI-9  | <i>Medicago truncatula</i>        | Medtr2g026040.1   |
| MtCPI-10 | <i>Medicago truncatula</i>        | Medtr2g028080.1   |
| MtCPI-11 | <i>Medicago truncatula</i>        | Medtr6g078440.1   |
| MtCPI-12 | <i>Medicago truncatula</i>        | Medtr5g091360.1   |
| MtCPI-13 | <i>Medicago truncatula</i>        | Medtr5g088770.1   |
| MtCPI-14 | <i>Medicago truncatula</i>        | Medtr5g098560.1   |
| MtCPI-15 | <i>Medicago truncatula</i>        | Medtr5g091260.1   |
| MtCPI-16 | <i>Medicago truncatula</i>        | Medtr5g098550.1   |
| MtCPI-17 | <i>Medicago truncatula</i>        | Medtr5g091280.1   |
| MtCPI-18 | <i>Medicago truncatula</i>        | Medtr5g091520.1   |
| MtCPI-19 | <i>Medicago truncatula</i>        | Medtr8g041410.1   |
| MtCPI-20 | <i>Medicago truncatula</i>        | Medtr8g079410.1   |
| MtCPI-21 | <i>Medicago truncatula</i>        | Medtr4g095630.1   |
| MtCPI-22 | <i>Medicago truncatula</i>        | Medtr4g133540.1   |
| SmCPI-1  | <i>Selaginella moellendorffii</i> | 19455             |
| SmCPI-2  | <i>Selaginella moellendorffii</i> | 418098            |
| SmCPI-3  | <i>Selaginella moellendorffii</i> | 85303             |
| VvCPI-1  | <i>Vitis vinifera</i>             | GSVIVT01003320001 |
| VvCPI-2  | <i>Vitis vinifera</i>             | GSVIVT01025801001 |
| VvCPI-3  | <i>Vitis vinifera</i>             | GSVIVT01026080001 |
| VvCPI-4  | <i>Vitis vinifera</i>             | GSVIVT01036582001 |
| VvCPI-5  | <i>Vitis vinifera</i>             | GSVIVT01037389001 |

### I. I51 Serine Carboxypeptidase Y inhibitor sequences.

| <b>Protein</b> | <b>Organism</b>             | <b>Gene model</b>       |
|----------------|-----------------------------|-------------------------|
| AtSCPYP1-1     | <i>Arabidopsis thaliana</i> | AT2G27550.1             |
| AtSCPYP1-2     | <i>Arabidopsis thaliana</i> | AT4G20370.1             |
| AtSCPYP1-3     | <i>Arabidopsis thaliana</i> | AT1G18100.1             |
| AtSCPYP1-4     | <i>Arabidopsis thaliana</i> | AT1G65480.1             |
| AtSCPYP1-5     | <i>Arabidopsis thaliana</i> | AT5G62040.1             |
| AtSCPYP1-6     | <i>Arabidopsis thaliana</i> | AT5G03840.1             |
| FvSCPYP1-1     | <i>Fragaria vesca</i>       | mrna13304.1-v1.0-hybrid |
| FvSCPYP1-2     | <i>Fragaria vesca</i>       | mrna21535.1-v1.0-hybrid |
| FvSCPYP1-3     | <i>Fragaria vesca</i>       | mrna21992.1-v1.0-hybrid |
| FvSCPYP1-4     | <i>Fragaria vesca</i>       | mrna09405.1-v1.0-hybrid |
| FvSCPYP1-5     | <i>Fragaria vesca</i>       | mrna28959.1-v1.0-hybrid |
| MtSCPYP1-1     | <i>Medicago truncatula</i>  | Medtr2g086270.1         |
| MtSCPYP1-2     | <i>Medicago truncatula</i>  | Medtr7g085040.1         |
| MtSCPYP1-3     | <i>Medicago truncatula</i>  | Medtr7g006690.1         |
| MtSCPYP1-4     | <i>Medicago truncatula</i>  | Medtr7g084970.1         |
| MtSCPYP1-5     | <i>Medicago truncatula</i>  | Medtr7g104460.1         |

|            |                                   |                   |
|------------|-----------------------------------|-------------------|
| MtSCPYI-6  | <i>Medicago truncatula</i>        | Medtr7g006630.1   |
| MtSCPYI-7  | <i>Medicago truncatula</i>        | Medtr8g106840.1   |
| MtSCPYI-8  | <i>Medicago truncatula</i>        | AC146807_25.1     |
| VvSCPYI-1  | <i>Vitis vinifera</i>             | GSVIVP00007370001 |
| VvSCPYI-2  | <i>Vitis vinifera</i>             | GSVIVP00012870001 |
| VvSCPYI-3  | <i>Vitis vinifera</i>             | GSVIVP00013086001 |
| VvSCPYI-4  | <i>Vitis vinifera</i>             | GSVIVP00017800001 |
| VvSCPYI-5  | <i>Vitis vinifera</i>             | GSVIVP00021628001 |
| VvSCPYI-6  | <i>Vitis vinifera</i>             | GSVIVP00037374001 |
| OsSCPYI-1  | <i>Oryza sativa</i>               | Os01g02120.1      |
| OsSCPYI-2  | <i>Oryza sativa</i>               | Os01g11940.1      |
| OsSCPYI-3  | <i>Oryza sativa</i>               | Os02g13830.1      |
| OsSCPYI-4  | <i>Oryza sativa</i>               | Os02g32950.1      |
| OsSCPYI-5  | <i>Oryza sativa</i>               | Os04g33570.1      |
| OsSCPYI-6  | <i>Oryza sativa</i>               | Os04g41130.1      |
| OsSCPYI-7  | <i>Oryza sativa</i>               | Os06g06300.1      |
| OsSCPYI-8  | <i>Oryza sativa</i>               | Os06g06320.1      |
| OsSCPYI-9  | <i>Oryza sativa</i>               | Os06g30370.1      |
| OsSCPYI-10 | <i>Oryza sativa</i>               | Os06g35940.1      |
| OsSCPYI-11 | <i>Oryza sativa</i>               | Os09g33850.1      |
| OsSCPYI-12 | <i>Oryza sativa</i>               | Os05g44180.1      |
| OsSCPYI-13 | <i>Oryza sativa</i>               | Os12g05590.1      |
| OsSCPYI-14 | <i>Oryza sativa</i>               | Os12g13030.1      |
| OsSCPYI-15 | <i>Oryza sativa</i>               | Os11g05470.1      |
| OsSCPYI-16 | <i>Oryza sativa</i>               | Os11g18870.1      |
| OsSCPYI-17 | <i>Oryza sativa</i>               | Os02g39064.1      |
| SbSCPYI-1  | <i>Sorghum bicolor</i>            | Sb0010s003120.1   |
| SbSCPYI-2  | <i>Sorghum bicolor</i>            | Sb02g029725.1     |
| SbSCPYI-3  | <i>Sorghum bicolor</i>            | Sb03g001700.1     |
| SbSCPYI-4  | <i>Sorghum bicolor</i>            | Sb03g008270.1     |
| SbSCPYI-5  | <i>Sorghum bicolor</i>            | Sb03g034580.1     |
| SbSCPYI-6  | <i>Sorghum bicolor</i>            | Sb04g008320.1     |
| SbSCPYI-7  | <i>Sorghum bicolor</i>            | Sb04g021650.1     |
| SbSCPYI-8  | <i>Sorghum bicolor</i>            | Sb04g025210.1     |
| SbSCPYI-9  | <i>Sorghum bicolor</i>            | Sb05g003200.1     |
| SbSCPYI-10 | <i>Sorghum bicolor</i>            | Sb06g012260.1     |
| SbSCPYI-11 | <i>Sorghum bicolor</i>            | Sb06g015490.1     |
| SbSCPYI-12 | <i>Sorghum bicolor</i>            | Sb06g020850.1     |
| SbSCPYI-13 | <i>Sorghum bicolor</i>            | Sb08g003210.1     |
| SbSCPYI-14 | <i>Sorghum bicolor</i>            | Sb08g008180.1     |
| SbSCPYI-15 | <i>Sorghum bicolor</i>            | Sb10g003940.1     |
| SbSCPYI-16 | <i>Sorghum bicolor</i>            | Sb10g013070.1     |
| SbSCPYI-17 | <i>Sorghum bicolor</i>            | Sb10g021790.1     |
| SmSCPYI-1  | <i>Selaginella moellendorffii</i> | 416612            |
| SmSCPYI-2  | <i>Selaginella moellendorffii</i> | 411506            |
| SmSCPYI-3  | <i>Selaginella moellendorffii</i> | 235975            |
| SmSCPYI-4  | <i>Selaginella moellendorffii</i> | 166207            |
| SmSCPYI-5  | <i>Selaginella moellendorffii</i> | 413641            |

|            |                                   |                                  |
|------------|-----------------------------------|----------------------------------|
| SmSCPYI-6  | <i>Selaginella moellendorffii</i> | 413642                           |
| SmSCPYI-7  | <i>Selaginella moellendorffii</i> | 413646                           |
| SmSCPYI-8  | <i>Selaginella moellendorffii</i> | 413647                           |
| SmSCPYI-9  | <i>Selaginella moellendorffii</i> | 413648                           |
| SmSCPYI-10 | <i>Selaginella moellendorffii</i> | 413667                           |
| SmSCPYI-11 | <i>Selaginella moellendorffii</i> | 143762                           |
| SmSCPYI-12 | <i>Selaginella moellendorffii</i> | 17528                            |
| SmSCPYI-13 | <i>Selaginella moellendorffii</i> | 416299                           |
| SmSCPYI-14 | <i>Selaginella moellendorffii</i> | 416302                           |
| SmSCPYI-15 | <i>Selaginella moellendorffii</i> | 416303                           |
| SmSCPYI-16 | <i>Selaginella moellendorffii</i> | 416312                           |
| SmSCPYI-17 | <i>Selaginella moellendorffii</i> | 416313                           |
| SmSCPYI-18 | <i>Selaginella moellendorffii</i> | 445941                           |
| PpSCPYI-1  | <i>Physcomitrella patens</i>      | Pp1s111_36V6.1                   |
| PpSCPYI-2  | <i>Physcomitrella patens</i>      | Pp1s441_20V6.1                   |
| PpSCPYI-3  | <i>Physcomitrella patens</i>      | Pp1s243_37V6.1                   |
| PpSCPYI-4  | <i>Physcomitrella patens</i>      | Pp1s34_16V6.1                    |
| PpSCPYI-5  | <i>Physcomitrella patens</i>      | Pp1s34_16V6.2                    |
| PpSCPYI-6  | <i>Physcomitrella patens</i>      | Pp1s68_5V6.1                     |
| CsSCPYI-1  | <i>Coccomyxa subellipsoidea</i>   | estExt_fgenesh1_pg.C_20153 46092 |
| MpSCPYI-1  | <i>Micromonas pusilla</i>         | CCMP1545.EuGene.0000070162 59313 |
| MpSCPYI-2  | <i>Micromonas pusilla</i>         | CCMP1545.EuGene.0000050752 58447 |
